# Supplementary material for: The pathophysiological impact of intra-abdominal hypertension in pigs
Source: PubMed Central journal article supplement (PMC10461824; doi:10.1371/journal.pone.0290451), 2023-08-28
Supplement: pone.0290451.s001.pdf [file pone.0290451.s001.pdf]

| Unique pig number | ANIMAL-Pig | Category | GROUP   | IAP Level | Study duration | WEIGHT |
|-------------------|------------|----------|---------|-----------|----------------|--------|
| 1                 | 1          | Control  | Control | 0         | 3              | 24.45  |
| 1                 | 1          | Control  | Control | 0         | 3              | 24.45  |
| 1                 | 1          | Control  | Control | 0         | 3              | 24.45  |
| 1                 | 1          | Control  | Control | 0         | 3              | 24.45  |
| 1                 | 1          | Control  | Control | 0         | 3              | 24.45  |
| 1                 | 1          | Control  | Control | 0         | 3              | 24.45  |
| 1                 | 1          | Control  | Control | 0         | 3              | 24.45  |
| 2                 | 2          | Control  | Control | 0         | 3              | 19.4   |
| 2                 | 2          | Control  | Control | 0         | 3              | 19.4   |
| 2                 | 2          | Control  | Control | 0         | 3              | 19.4   |
| 2                 | 2          | Control  | Control | 0         | 3              | 19.4   |
| 2                 | 2          | Control  | Control | 0         | 3              | 19.4   |
| 2                 | 2          | Control  | Control | 0         | 3              | 19.4   |
| 2                 | 2          | Control  | Control | 0         | 3              | 19.4   |
| 2                 | 2          | Control  | Control | 0         | 3              | 19.4   |
| 3                 | 3          | Control  | Control | 0         | 3              | 20.9   |
| 3                 | 3          | Control  | Control | 0         | 3              | 20.9   |
| 3                 | 3          | Control  | Control | 0         | 3              | 20.9   |
| 3                 | 3          | Control  | Control | 0         | 3              | 20.9   |
| 3                 | 3          | Control  | Control | 0         | 3              | 20.9   |
| 3                 | 3          | Control  | Control | 0         | 3              | 20.9   |
| 3                 | 3          | Control  | Control | 0         | 3              | 20.9   |
| 3                 | 3          | Control  | Control | 0         | 3              | 20.9   |
| 4                 | 4          | Control  | Control | 0         | 3              | 23.85  |
| 4                 | 4          | Control  | Control | 0         | 3              | 23.85  |
| 4                 | 4          | Control  | Control | 0         | 3              | 23.85  |
| 4                 | 4          | Control  | Control | 0         | 3              | 23.85  |
| 4                 | 4          | Control  | Control | 0         | 3              | 23.85  |
| 4                 | 4          | Control  | Control | 0         | 3              | 23.85  |
| 4                 | 4          | Control  | Control | 0         | 3              | 23.85  |
| 5                 | 5          | Control  | Control | 0         | 3              | 24.7   |
| 5                 | 5          | Control  | Control | 0         | 3              | 24.7   |
| 5                 | 5          | Control  | Control | 0         | 3              | 24.7   |
| 5                 | 5          | Control  | Control | 0         | 3              | 24.7   |
| 5                 | 5          | Control  | Control | 0         | 3              | 24.7   |
| 5                 | 5          | Control  | Control | 0         | 3              | 24.7   |
| 5                 | 5          | Control  | Control | 0         | 3              | 24.7   |
| 6                 | 1          | Study    | Pneumo  | 20        | 3              | 23     |
| 6                 | 1          | Study    | Pneumo  | 20        | 3              | 23     |
| 6                 | 1          | Study    | Pneumo  | 20        | 3              | 23     |
| 6                 | 1          | Study    | Pneumo  | 20        | 3              | 23     |
| 6                 | 1          | Study    | Pneumo  | 20        | 3              | 23     |
| 6                 | 1          | Study    | Pneumo  | 20        | 3              | 23     |
| 6                 | 1          | Study    | Pneumo  | 20        | 3              | 23     |
| 7                 | 2          | Study    | Pneumo  | 20        | 3              | 23.5   |
| 7                 | 2          | Study    | Pneumo  | 20        | 3              | 23.5   |
| 7                 | 2          | Study    | Pneumo  | 20        | 3              | 23.5   |
| 7                 | 2          | Study    | Pneumo  | 20        | 3              | 23.5   |
| 7                 | 2          | Study    | Pneumo  | 20        | 3              | 23.5   |
| 7                 | 2          | Study    | Pneumo  | 20        | 3              | 23.5   |
| 7                 | 2          | Study    | Pneumo  | 20        | 3              | 23.5   |
| 8                 | 3          | Study    | Pneumo  | 20        | 3              | 24     |
| 8                 | 3          | Study    | Pneumo  | 20        | 3              | 24     |



















| MEASUREMENT | TIME  | Alive/Dead | HEART RATE | RESP RATE | SYSTOLIC BP(mmHg) |
|-------------|-------|------------|------------|-----------|-------------------|
| 10          | 19:20 | 1          | 111        | 14        | 75                |
| 9           | 18:50 | 1          | 102        | 14        | 75                |
| 8           | 18:20 | 1          | 101        | 14        | 78                |
| 7           | 17:50 | 1          | 99         | 14        | 71                |
| 6           | 17:20 | 1          | 95         | 14        | 71                |
| 5           | 16:50 | 1          | 95         | 14        | 77                |
| 4           | 16:20 | 1          | 86         | 14        | 60                |
| 10          | 16:31 | 1          | 120        | 14        | 81                |
| 9           | 16:01 | 1          | 109        | 14        | 81                |
| 8           | 15:31 | 1          | 109        | 14        | 87                |
| 6           | 14:31 | 1          | 109        | 14        | 91                |
| 5           | 14:01 | 1          | 109        | 14        | 106               |
| 7           | 15:01 | 1          | 104        | 14        | 86                |
| 4           | 13:31 | 1          | 104        | 14        | 120               |
| 10          | 15:01 | 1          | 115        | 14        | 93                |
| 9           | 14:31 | 1          | 101        | 14        | 86                |
| 8           | 14:01 | 1          | 100        | 14        | 96                |
| 7           | 13:31 | 1          | 88         | 14        | 84                |
| 6           | 13:01 | 1          | 84         | 14        | 74                |
| 4           | 12:01 | 1          | 92         | 14        | 94                |
| 5           | 12:31 | 1          | 102        | 14        | 87                |
| 10          | 15:05 | 1          | 110        | 14        | 78                |
| 9           | 14:35 | 1          | 109        | 14        | 80                |
| 8           | 14:05 | 1          | 111        | 14        | 88                |
| 7           | 13:35 | 1          | 103        | 14        | 90                |
| 6           | 13:05 | 1          | 94         | 14        | 86                |
| 5           | 12:35 | 1          | 84         | 14        | 80                |
| 4           | 12:05 | 1          | 73         | 14        | 76                |
| 4           | 11:45 | 1          | 109        | 14        | 112               |
| 6           | 12:45 | 1          | 125        | 14        | 110               |
| 5           | 12:15 | 1          | 118        | 14        | 108               |
| 9           | 14:15 | 1          | 128        | 14        | 108               |
| 7           | 13:15 | 1          | 128        | 14        | 105               |
| 10          | 14:45 | 1          | 122        | 14        | 94                |
| 8           | 13:45 | 1          | 128        | 14        | 99                |
| 4           | 11:10 | 1          | 82         | 14        | 71                |
| 5           | 11:40 | 1          | 84         | 14        | 74                |
| 6           | 12:10 | 1          | 92         | 14        | 74                |
| 7           | 12:40 | 1          | 95         | 14        | 71                |
| 8           | 13:10 | 1          | 99         | 14        | 72                |
| 9           | 13:40 | 1          | 98         | 14        | 68                |
| 10          | 14:10 | 1          | 99         | 14        | 66                |
| 4           | 10:30 | 1          | 82         | 14        | 69                |
| 5           | 11:00 | 1          | 84         | 14        | 70                |
| 6           | 11:30 | 1          | 86         | 14        | 66                |
| 7           | 12:00 | 1          | 88         | 14        | 64                |
| 8           | 12:30 | 1          | 90         | 14        | 63                |
| 9           | 13:00 | 1          | 92         | 14        | 60                |
| 10          | 13:30 | 1          | 84         | 14        | 56                |
| 4           | 10:20 | 1          | 83         | 14        | 80                |
| 5           | 10:50 | 1          | 86         | 14        | 81                |

|    |       |   |     |    |    |
|----|-------|---|-----|----|----|
| 6  | 11:20 | 1 | 88  | 14 | 78 |
| 7  | 11:50 | 1 | 89  | 14 | 72 |
| 8  | 12:20 | 1 | 91  | 14 | 68 |
| 9  | 12:50 | 1 | 92  | 14 | 66 |
| 10 | 13:20 | 1 | 96  | 14 | 65 |
| 4  | 10:00 | 1 | 73  | 14 | 66 |
| 5  | 10:30 | 1 | 76  | 14 | 64 |
| 6  | 11:00 | 1 | 77  | 14 | 64 |
| 8  | 12:00 | 1 | 73  | 14 | 56 |
| 9  | 12:30 | 1 | 73  | 14 | 52 |
| 10 | 13:00 | 1 | 75  | 14 | 50 |
| 7  | 11:30 | 1 | 75  | 14 | 56 |
| 10 | 13:45 | 1 | 131 | 63 | 63 |
| 9  | 13:15 | 1 | 117 | 58 | 58 |
| 4  | 10:45 | 1 | 92  | 75 | 75 |
| 6  | 11:45 | 1 | 107 | 69 | 69 |
| 8  | 12:45 | 1 | 102 | 56 | 56 |
| 5  | 11:15 | 1 | 101 | 71 | 71 |
| 7  | 12:15 | 1 | 101 | 59 | 59 |
| 4  | 10:20 | 1 | 88  | 14 | 63 |
| 5  | 10:50 | 1 | 89  | 14 | 62 |
| 6  | 11:20 | 1 | 88  | 14 | 60 |
| 7  | 11:50 | 1 | 89  | 14 | 58 |
| 8  | 12:20 | 1 | 85  | 14 | 55 |
| 9  | 12:50 | 1 | 75  | 14 | 53 |
| 11 | 13:50 | 1 | 75  | 14 | 48 |
| 10 | 13:20 | 1 | 76  | 14 | 51 |
| 12 | 14:20 | 1 | 86  | 14 | 45 |
| 13 | 14:50 | 1 | 43  | 14 | 54 |
| 14 | 15:20 | 1 | 34  | 14 | 51 |
| 3  | 10:20 | 1 | 105 | 14 | 52 |
| 4  | 10:40 | 1 | 143 | 14 | 51 |
| 5  | 11:10 | 1 | 167 | 14 | 50 |
| 6  | 11:40 | 1 | 147 | 14 | 48 |
| 7  | 12:10 | 1 | 146 | 14 | 49 |
| 8  | 12:40 | 1 | 138 | 14 | 41 |
| 9  | 13:10 | 1 | 141 | 14 | 40 |
| 10 | 13:18 | 2 |     |    |    |
| 4  | 10:25 | 1 | 61  | 14 | 58 |
| 5  | 10:55 | 1 | 56  | 14 | 63 |
| 6  | 11:25 | 1 | 76  | 14 | 68 |
| 7  | 11:55 | 1 | 82  | 14 | 60 |
| 8  | 12:25 | 1 | 90  | 14 | 57 |
| 9  | 12:55 | 1 | 99  | 14 | 53 |
| 14 | 15:25 | 1 | 107 | 14 | 52 |
| 10 | 13:25 | 1 | 101 | 14 | 52 |
| 12 | 14:25 | 1 | 108 | 14 | 54 |
| 11 | 13:55 | 1 | 104 | 14 | 51 |
| 13 | 14:55 | 1 | 108 | 14 | 56 |
| 3  | 9:31  | 1 | 89  | 14 | 60 |
| 4  | 9:51  | 1 | 78  | 14 | 51 |
| 5  | 10:21 | 1 | 88  | 14 | 49 |

|    |       |   |     |    |    |
|----|-------|---|-----|----|----|
| 6  | 10:51 | 1 | 100 | 14 | 48 |
| 7  | 11:21 | 1 | 97  | 14 | 43 |
| 8  | 11:51 | 1 | 98  | 14 | 43 |
| 9  | 12:21 | 1 | 112 | 14 | 44 |
| 10 | 12:51 | 1 | 116 | 14 | 45 |
| 11 | 12:31 | 1 | 101 | 14 | 44 |
| 12 | 12:51 | 1 | 97  | 14 | 42 |
| 13 | 13:31 | 1 | 112 | 14 | 46 |
| 14 | 13:51 | 1 | 116 | 14 | 46 |
| 4  | 9:50  | 1 | 84  | 14 | 53 |
| 5  | 10:20 | 1 | 80  | 14 | 44 |
| 6  | 10:50 | 1 | 75  | 14 | 48 |
| 7  | 11:20 | 1 | 74  | 14 | 47 |
| 8  | 11:50 | 1 | 71  | 14 | 45 |
| 9  | 12:20 | 1 | 68  | 14 | 45 |
| 10 | 12:50 | 1 | 68  | 14 | 43 |
| 14 | 14:50 | 1 | 74  | 14 | 41 |
| 11 | 13:20 | 1 | 67  | 14 | 41 |
| 12 | 13:50 | 1 | 67  | 14 | 40 |
| 13 | 14:20 | 1 | 70  | 14 | 40 |
| 3  | 10:20 | 1 | 75  | 14 | 63 |
| 4  | 10:40 | 1 | 92  | 14 | 65 |
| 5  | 11:10 | 1 | 102 | 14 | 62 |
| 6  | 11:40 | 1 | 113 | 14 | 62 |
| 7  | 12:10 | 1 | 114 | 14 | 62 |
| 8  | 12:40 | 1 | 116 | 14 | 61 |
| 9  | 13:15 | 1 | 110 | 14 | 60 |
| 10 | 13:40 | 1 | 94  | 14 | 53 |
| 3  | 9:45  | 1 | 85  | 14 | 66 |
| 4  | 10:05 | 1 | 89  | 14 | 64 |
| 5  | 10:45 | 1 | 98  | 14 | 65 |
| 6  | 11:05 | 1 | 107 | 14 | 64 |
| 8  | 12:05 | 1 | 120 | 14 | 68 |
| 7  | 11:45 | 1 | 118 | 14 | 67 |
| 9  | 12:45 | 1 | 126 | 14 | 65 |
| 10 | 13:05 | 1 | 133 | 14 | 60 |
| 3  | 9:45  | 1 | 85  | 14 | 60 |
| 4  | 10:05 | 1 | 107 | 14 | 59 |
| 5  | 10:45 | 1 | 129 | 14 | 62 |
| 6  | 11:05 | 1 | 142 | 14 | 68 |
| 7  | 11:45 | 1 | 139 | 14 | 67 |
| 8  | 12:05 | 1 | 134 | 14 | 64 |
| 9  | 12:45 | 1 | 130 | 14 | 64 |
| 10 | 13:05 | 1 | 125 | 14 | 60 |
| 3  | 9:30  | 1 | 60  | 14 | 54 |
| 4  | 9:50  | 1 | 167 | 14 |    |
| 5  | 10:20 | 1 | 102 | 14 | 68 |
| 6  | 10:50 | 1 | 156 | 14 | 84 |
| 7  | 11:20 | 1 | 148 | 14 | 85 |
| 8  | 11:50 | 1 | 89  | 14 | 43 |
| 9  | 12:20 | 1 | 95  | 14 | 47 |
| 10 | 12:50 | 1 | 91  | 14 | 44 |

|    |       |   |     |    |    |
|----|-------|---|-----|----|----|
| 3  | 9:20  | 1 | 92  | 14 | 75 |
| 4  | 9:40  | 1 | 85  | 14 | 73 |
| 5  | 10:10 | 1 | 84  | 14 | 62 |
| 6  | 10:40 | 1 | 102 | 14 | 58 |
| 7  | 11:10 | 1 | 109 | 14 | 59 |
| 8  | 11:40 | 1 | 113 | 14 | 58 |
| 9  | 12:10 | 1 | 110 | 14 | 56 |
| 10 | 12:40 | 1 | 105 | 14 | 55 |
| 3  | 10:10 | 1 | 83  | 14 | 65 |
| 4  | 10:30 | 1 | 99  | 14 | 72 |
| 5  | 11:00 | 1 | 124 | 14 | 79 |
| 6  | 11:30 | 1 | 150 | 14 | 72 |
| 7  | 12:00 | 1 | 154 | 14 | 70 |
| 8  | 12:30 | 1 | 115 | 14 | 55 |
| 9  | 13:00 | 1 | 146 | 14 | 63 |
| 10 | 13:30 | 1 | 139 | 14 | 57 |
| 11 | 14:00 | 1 | 136 | 14 | 52 |
| 12 | 14:30 | 1 | 136 | 14 | 54 |
| 13 | 15:00 | 1 | 68  | 14 | 54 |
| 3  | 10:13 | 1 | 79  | 14 | 56 |
| 4  | 10:33 | 1 | 103 | 14 | 62 |
| 5  | 11:03 | 1 | 111 | 14 | 60 |
| 6  | 11:33 | 1 | 126 | 14 | 60 |
| 7  | 12:03 | 1 | 133 | 14 | 61 |
| 8  | 12:33 | 1 | 130 | 14 | 59 |
| 9  | 13:03 | 1 | 127 | 14 | 59 |
| 10 | 13:33 | 1 | 132 | 14 | 60 |
| 11 | 14:03 | 1 | 135 | 14 | 61 |
| 12 | 14:33 | 1 | 136 | 14 | 59 |
| 13 | 15:03 | 1 | 132 | 14 | 58 |
| 14 | 15:33 | 1 | 127 | 14 | 52 |
| 3  | 9:30  | 1 | 95  | 14 | 63 |
| 4  | 9:50  | 1 | 108 | 14 | 62 |
| 5  | 10:20 | 1 | 105 | 14 | 61 |
| 6  | 10:50 | 1 | 100 | 14 | 58 |
| 8  | 11:50 | 1 | 163 | 14 |    |
| 9  | 12:20 | 1 | 109 | 14 | 63 |
| 10 | 12:50 | 1 | 84  | 14 | 55 |
| 11 | 13:20 | 1 | 100 | 14 | 56 |
| 12 | 13:50 | 1 | 85  | 14 | 51 |
| 13 | 14:20 | 1 | 82  | 14 | 50 |
| 14 | 14:50 | 1 | 68  | 14 | 42 |
| 7  | 11:20 | 1 | 129 | 14 | 58 |
| 3  | 9:33  | 1 | 83  | 14 | 65 |
| 4  | 9:53  | 1 | 92  | 14 | 58 |
| 5  | 10:23 | 1 | 100 | 14 | 62 |
| 6  | 10:53 | 1 | 96  | 14 | 58 |
| 7  | 11:23 | 1 | 106 | 14 | 60 |
| 8  | 11:53 | 1 | 98  | 14 | 55 |
| 9  | 12:23 | 1 | 90  | 14 | 44 |
| 10 | 12:53 | 1 | 80  | 14 | 50 |
| 11 | 13:23 | 1 | 87  | 14 | 45 |

|    |       |   |     |    |     |
|----|-------|---|-----|----|-----|
| 12 | 13:53 | 1 | 123 | 14 |     |
| 13 | 14:23 | 1 | 78  | 14 | 43  |
| 14 | 14:53 | 1 | 84  | 14 | 50  |
| 3  | 9:31  | 1 | 71  | 14 | 63  |
| 4  | 9:51  | 1 | 92  | 14 | 58  |
| 5  | 10:21 | 1 | 94  | 14 | 52  |
| 6  | 10:51 | 1 | 109 | 14 | 51  |
| 7  | 11:21 | 1 | 122 | 14 | 58  |
| 8  | 11:51 | 1 | 117 | 14 | 49  |
| 9  | 12:21 | 1 | 136 | 14 | 53  |
| 10 | 12:51 | 1 | 127 | 14 | 47  |
| 11 | 13:21 | 1 | 142 | 14 | 50  |
| 12 | 13:51 | 1 | 158 | 14 | 53  |
| 13 | 14:21 | 1 | 123 | 14 | 42  |
| 14 | 14:40 | 2 | 71  | 14 |     |
| 4  | 11:35 | 1 | 181 | 14 | 81  |
| 5  | 12:05 | 1 | 177 | 14 | 79  |
| 6  | 12:35 | 1 | 149 | 14 | 64  |
| 10 | 14:35 | 1 | 88  | 14 | 57  |
| 8  | 13:35 | 1 | 109 | 14 | 63  |
| 9  | 14:05 | 1 | 102 | 14 | 59  |
| 7  | 13:05 | 1 | 112 | 14 | 53  |
| 11 | 14:51 | 2 | 0   | 14 | 0   |
| 7  | 11:30 | 1 | 162 | 14 | 114 |
| 6  | 11:00 | 1 | 172 | 14 | 98  |
| 5  | 10:30 | 1 | 152 | 14 | 69  |
| 4  | 10:00 | 1 | 110 | 14 | 70  |
| 8  | 12:00 | 1 | 119 | 14 | 56  |
| 10 | 13:00 | 1 | 117 | 14 | 60  |
| 9  | 12:30 | 1 | 98  | 14 | 52  |
| 4  | 10:15 | 1 | 157 | 14 | 64  |
| 6  | 11:15 | 1 | 199 | 14 | 68  |
| 5  | 10:45 | 1 | 151 | 14 | 65  |
| 7  | 11:45 | 1 | 187 | 14 | 64  |
| 8  | 12:15 | 1 | 187 | 14 | 62  |
| 9  | 12:45 | 1 | 180 | 14 | 61  |
| 10 | 13:15 | 1 | 157 | 14 | 57  |
| 11 | 13:20 | 1 | 99  | 14 | 32  |
| 4  | 10:10 | 1 | 129 | 14 | 77  |
| 5  | 10:40 | 1 | 114 | 14 | 71  |
| 6  | 11:10 | 1 | 132 | 14 | 61  |
| 7  | 11:40 | 1 | 126 | 14 | 56  |
| 8  | 12:10 | 1 | 103 | 14 | 56  |
| 9  | 12:40 | 1 | 116 | 14 | 54  |
| 10 | 13:10 | 1 | 131 | 14 | 51  |
| 11 | 13:28 | 2 | 0   | 14 | 0   |
| 11 | 13:25 | 2 | 0   | 14 | 0   |
| 4  | 9:55  | 1 | 75  | 14 | 82  |
| 5  | 10:25 | 1 | 130 | 14 | 77  |
| 6  | 10:55 | 1 | 150 | 14 | 76  |
| 7  | 11:25 | 1 | 176 | 14 | 78  |
| 8  | 11:55 | 1 | 171 | 14 | 72  |

|    |       |   |     |    |    |
|----|-------|---|-----|----|----|
| 9  | 12:25 | 1 | 171 | 14 | 65 |
| 10 | 12:55 | 1 | 142 | 14 | 67 |
| 11 | 13:08 | 1 | 71  | 14 | 67 |
| 4  | 10:30 | 1 | 150 | 14 | 61 |
| 5  | 11:00 | 1 | 180 | 14 | 66 |
| 6  | 11:30 | 1 | 180 | 14 | 67 |
| 7  | 12:00 | 1 | 176 | 14 | 60 |
| 8  | 12:30 | 1 | 166 | 14 | 57 |
| 9  | 13:00 | 1 | 165 | 14 | 53 |
| 10 | 13:30 | 1 | 156 | 14 | 49 |
| 11 | 14:00 | 1 | 130 | 14 | 39 |
| 12 | 14:30 | 1 | 100 | 14 | 41 |
| 13 | 15:00 | 1 | 76  | 14 | 36 |
| 14 | 15:30 | 2 |     |    |    |
| 4  | 11:10 | 1 | 200 | 14 |    |
| 5  | 11:40 | 1 | 109 | 14 | 55 |
| 6  | 12:10 | 1 | 114 | 14 | 50 |
| 7  | 12:40 | 1 | 133 | 14 | 51 |
| 8  | 13:10 | 1 | 85  | 14 | 47 |
| 9  | 13:40 | 1 | 65  | 14 | 40 |
| 10 | 13:45 | 2 |     |    |    |
| 4  | 11:22 | 1 | 85  | 14 | 67 |
| 5  | 11:52 | 1 | 94  | 14 | 67 |
| 6  | 12:22 | 1 | 100 | 14 | 69 |
| 7  | 12:52 | 1 | 103 | 14 | 66 |
| 8  | 13:22 | 1 | 104 | 14 | 64 |
| 9  | 13:52 | 1 | 102 | 14 | 58 |
| 10 | 14:22 | 1 | 109 | 14 | 63 |
| 11 | 14:52 | 1 | 103 | 14 | 61 |
| 12 | 15:22 | 1 | 95  | 14 | 58 |
| 15 | 16:48 | 1 | 72  | 14 | 28 |
| 13 | 15:52 | 1 | 107 | 14 | 64 |
| 14 | 16:22 | 1 | 113 | 14 | 63 |
| 4  | 10:32 | 1 | 96  | 14 | 87 |
| 5  | 11:02 | 1 | 89  | 14 | 79 |
| 6  | 11:32 | 1 | 83  | 14 | 75 |
| 7  | 12:02 | 1 | 92  | 14 | 77 |
| 8  | 12:32 | 1 | 100 | 14 | 83 |
| 9  | 13:02 | 1 | 108 | 14 | 82 |
| 10 | 13:32 | 1 | 118 | 14 | 91 |
| 11 | 14:02 | 1 | 128 | 14 | 96 |
| 12 | 14:32 | 1 | 62  | 14 |    |
| 13 | 15:02 | 1 | 94  | 14 | 80 |
| 15 | 16:00 | 1 | 56  | 14 | 30 |
| 14 | 15:32 | 1 | 72  | 14 | 53 |
| 4  | 10:42 | 1 | 118 | 14 | 66 |
| 5  | 11:12 | 1 | 152 | 14 | 68 |
| 6  | 11:42 | 1 | 157 | 14 | 73 |
| 7  | 12:12 | 1 | 166 | 14 | 70 |
| 8  | 12:42 | 1 | 163 | 14 | 70 |
| 9  | 13:12 | 1 | 161 | 14 | 68 |
| 10 | 13:42 | 1 | 154 | 14 | 65 |

|    |       |   |     |    |    |
|----|-------|---|-----|----|----|
| 11 | 14:12 | 1 | 161 | 14 | 73 |
| 12 | 14:42 | 1 | 148 | 14 | 73 |
| 13 | 15:12 | 1 | 103 | 14 | 42 |
| 14 | 15:42 | 1 | 72  | 14 | 46 |
| 15 | 15:54 | 2 |     |    |    |
| 5  | 14:45 | 1 | 139 | 14 | 54 |
| 6  | 15:15 | 1 | 138 | 14 | 50 |
| 7  | 15:45 | 1 | 130 | 14 | 62 |
| 8  | 16:15 | 1 | 105 | 14 | 56 |
| 10 | 17:15 | 1 | 72  | 14 | 37 |
| 9  | 16:45 | 1 | 95  | 14 | 47 |
| 11 | 17:45 | 2 |     |    |    |
| 5  | 11:30 | 1 | 112 | 14 | 65 |
| 6  | 12:00 | 1 | 131 | 14 | 65 |
| 7  | 12:30 | 1 | 124 | 14 | 65 |
| 8  | 13:00 | 1 | 118 | 14 | 65 |
| 9  | 13:30 | 1 | 119 | 14 | 65 |
| 10 | 14:00 | 1 | 106 | 14 | 65 |
| 5  | 11:50 | 1 | 105 | 14 | 73 |
| 6  | 12:20 | 1 | 128 | 14 | 78 |
| 7  | 12:50 | 1 | 101 | 14 | 61 |
| 8  | 13:20 | 1 | 96  | 14 | 57 |
| 10 | 14:20 | 1 | 122 | 14 | 58 |
| 9  | 13:50 | 1 | 120 | 14 | 78 |
| 9  | 14:15 | 1 | 78  | 14 | 63 |
| 5  | 12:15 | 1 | 100 | 14 | 74 |
| 10 | 14:45 | 1 | 89  | 14 | 64 |
| 6  | 12:45 | 1 | 100 | 14 | 76 |
| 7  | 13:15 | 1 | 93  | 14 | 71 |
| 8  | 13:45 | 1 | 88  | 14 | 64 |
| 3  | 13:35 | 1 | 163 | 14 | 65 |
| 7  | 15:30 | 1 | 150 | 14 | 42 |
| 6  | 15:00 | 1 | 157 | 14 | 43 |
| 4  | 14:00 | 1 | 200 | 14 | 66 |
| 8  | 16:00 | 1 | 140 | 14 | 40 |
| 5  | 14:30 | 1 | 169 | 14 | 45 |
| 9  | 16:30 | 1 | 114 | 14 | 35 |
| 10 | 17:00 | 1 | 126 | 14 | 38 |
| 3  | 12:15 | 1 | 120 | 14 | 96 |
| 4  | 12:35 | 1 | 157 | 14 |    |
| 6  | 13:35 | 1 | 111 | 14 | 77 |
| 5  | 13:05 | 1 | 121 | 14 | 76 |
| 10 | 15:35 | 1 | 137 | 14 | 77 |
| 8  | 14:35 | 1 | 122 | 14 | 77 |
| 7  | 14:05 | 1 | 129 | 14 | 80 |
| 9  | 15:05 | 1 | 135 | 14 | 76 |
| 11 | 16:05 | 1 | 152 | 14 | 80 |
| 12 | 16:35 | 1 | 159 | 14 | 79 |
| 13 | 17:05 | 1 | 150 | 14 | 76 |
| 14 | 17:35 | 1 | 145 | 14 | 76 |
| 3  | 10:30 | 1 | 95  | 14 | 61 |
| 4  | 10:50 | 1 | 139 | 14 | 74 |



|    |       |   |     |    |     |
|----|-------|---|-----|----|-----|
| 5  | 11:20 | 1 | 139 | 14 | 62  |
| 6  | 11:50 | 1 | 136 | 14 | 52  |
| 7  | 12:20 | 1 | 121 | 14 | 45  |
| 8  | 12:50 | 1 | 103 | 14 | 43  |
| 9  | 13:20 | 1 | 101 | 14 | 42  |
| 10 | 13:50 | 1 | 100 | 14 | 41  |
| 11 | 14:20 | 1 | 77  | 14 | 44  |
| 12 | 14:50 | 1 | 75  | 14 | 36  |
| 13 | 15:20 | 1 | 77  | 14 | 35  |
| 14 | 15:50 | 1 | 75  | 14 | 35  |
| 15 | 16:00 | 2 |     |    |     |
| 4  | 11:20 | 1 | 71  | 14 | 70  |
| 5  | 11:50 | 1 | 68  | 14 | 70  |
| 6  | 12:20 | 1 | 67  | 14 | 70  |
| 7  | 12:50 | 1 | 67  | 14 | 67  |
| 8  | 13:20 | 1 | 66  | 14 | 63  |
| 9  | 13:50 | 1 | 64  | 14 | 61  |
| 10 | 14:20 | 1 | 61  | 14 | 59  |
| 11 | 14:50 | 1 | 59  | 14 | 57  |
| 12 | 15:20 | 1 | 66  | 14 | 57  |
| 13 | 15:50 | 1 | 56  | 14 | 55  |
| 14 | 16:20 | 1 | 55  | 14 | 53  |
| 4  | 10:55 | 1 | 66  | 14 | 47  |
| 5  | 11:25 | 1 | 57  | 14 | 47  |
| 6  | 11:55 | 1 | 54  | 14 | 48  |
| 7  | 12:25 | 1 | 51  | 14 | 46  |
| 8  | 12:55 | 1 | 49  | 14 | 46  |
| 9  | 13:25 | 1 | 47  | 14 | 45  |
| 10 | 13:55 | 1 | 48  | 14 | 44  |
| 11 | 14:25 | 1 | 47  | 14 | 46  |
| 12 | 14:55 | 1 | 48  | 14 | 40  |
| 13 | 15:25 | 1 | 48  | 14 | 40  |
| 14 | 15:55 | 1 | 55  | 14 | 45  |
| 3  | 10:40 | 1 | 77  | 14 | 53  |
| 4  | 11:00 | 1 | 88  | 14 | 79  |
| 5  | 11:30 | 1 | 85  | 14 | 79  |
| 6  | 12:00 | 1 | 86  | 14 | 75  |
| 9  | 13:30 | 1 | 119 | 14 | 69  |
| 8  | 13:00 | 1 | 108 | 14 | 71  |
| 10 | 14:00 | 1 | 116 | 14 | 66  |
| 7  | 12:30 | 1 | 87  | 14 | 77  |
| 7  | 12:25 | 1 | 157 | 14 | 107 |
| 8  | 12:55 | 1 | 138 | 14 | 98  |
| 9  | 13:25 | 1 | 119 | 14 | 93  |
| 10 | 13:55 | 1 | 103 | 14 | 45  |
| 6  | 11:55 | 1 | 167 | 14 | 112 |
| 5  | 11:25 | 1 | 155 | 14 | 104 |
| 4  | 10:55 | 1 | 157 | 14 |     |
| 3  | 10:35 | 1 | 129 | 14 | 102 |
| 10 | 14:40 | 1 | 142 | 14 | 92  |
| 4  | 11:40 | 1 | 117 | 14 | 83  |
| 8  | 13:40 | 1 | 136 | 14 | 95  |

|             |       |            |            |           |                   |
|-------------|-------|------------|------------|-----------|-------------------|
| 9           | 14:10 | 1          | 139        | 14        | 87                |
| 7           | 13:10 | 1          | 137        | 14        | 97                |
| 5           | 12:10 | 1          | 83         | 14        | 76                |
| 3           | 11:20 | 1          | 160        | 14        | 108               |
| 6           | 12:40 | 1          | 94         | 14        | 80                |
| 3           | 10:35 | 1          | 132        | 14        | 90                |
| 4           | 10:55 | 1          | 145        | 14        | 72                |
| 5           | 11:25 | 1          | 129        | 14        | 72                |
| 6           | 11:55 | 1          | 117        | 14        | 68                |
| 7           | 12:25 | 1          | 104        | 14        | 61                |
| 8           | 12:55 | 1          | 93         | 14        | 55                |
| 9           | 13:25 | 1          | 83         | 14        | 51                |
| 10          | 13:55 | 1          | 85         | 14        | 48                |
| 3           | 11:10 | 1          | 110        | 14        | 65                |
| 4           | 11:30 | 1          | 155        | 14        |                   |
| 5           | 12:00 | 1          | 156        | 14        | 84                |
| 6           | 12:30 | 1          | 153        | 14        | 70                |
| 7           | 13:00 | 1          | 149        | 14        | 71                |
| 8           | 13:30 | 1          | 156        | 14        | 92                |
| 10          | 14:30 | 1          | 135        | 14        | 60                |
| 9           | 14:00 | 1          | 137        | 14        | 55                |
| 11          | 15:00 | 2          |            |           |                   |
| MEASUREMENT | TIME  | Alive/Dead | HEART RATE | RESP RATE | SYSTOLIC BP(mmHg) |

| DIASTOLIC BP(mmHg) | MAP(mmHg) | PgCO <sub>2</sub> (Kpa) | PgCO <sub>2</sub> (mmHg) | P(g-Et)CO <sub>2</sub> |
|--------------------|-----------|-------------------------|--------------------------|------------------------|
| 33                 | 50        | 12.4                    | 93.01                    | 7.8                    |
| 34                 | 50        | 13.3                    | 99.76                    | 8.9                    |
| 35                 | 51        | 15.3                    | 114.76                   | 10.1                   |
| 38                 | 52        | 15                      | 112.51                   | 9.4                    |
| 35                 | 48        | 12.5                    | 93.76                    | 6.7                    |
| 38                 | 52        | 11.6                    | 87.01                    | 5.4                    |
| 52                 | 56        | 10.3                    | 77.26                    | 5.3                    |
| 40                 | 58        | 9.1                     | 68.26                    | 4.1                    |
| 40                 | 59        | 8.8                     | 66.01                    | 3.8                    |
| 44                 | 63        | 8.8                     | 66.01                    | 4.1                    |
| 43                 | 65        | 8.6                     | 64.51                    | 3.7                    |
| 53                 | 79        | 8.2                     | 61.51                    | 3.8                    |
| 43                 | 63        | 8.7                     | 65.26                    | 4.1                    |
| 70                 | 97        | 8.1                     | 60.75                    | 3.5                    |
| 51                 | 67        | 9.3                     | 69.76                    | 4.3                    |
| 45                 | 59        | 9.4                     | 70.51                    | 4.7                    |
| 53                 | 70        | 9.6                     | 72.01                    | 4.6                    |
| 45                 | 60        | 9.7                     | 72.76                    | 4.8                    |
| 40                 | 53        | 9.3                     | 69.76                    | 4.3                    |
| 54                 | 70        | 8.6                     | 64.51                    | 4                      |
| 49                 | 65        | 8.5                     | 63.76                    | 3.7                    |
| 37                 | 54        | 7.9                     | 59.25                    | 3.2                    |
| 38                 | 55        | 7.8                     | 58.50                    | 3.4                    |
| 43                 | 61        | 8.1                     | 60.75                    | 3.6                    |
| 41                 | 61        | 8.1                     | 60.75                    | 3.6                    |
| 40                 | 57        | 8.1                     | 60.75                    | 3.3                    |
| 37                 | 54        | 8                       | 60.00                    | 3.4                    |
| 35                 | 50        | 8.2                     | 61.51                    | 3.9                    |
| 66                 | 85        | 8.6                     | 64.51                    | 3.9                    |
| 65                 | 84        | 8.4                     | 63.01                    | 3.7                    |
| 64                 | 83        | 8.6                     | 64.51                    | 3.9                    |
| 63                 | 83        | 8.2                     | 61.51                    | 3.7                    |
| 60                 | 80        | 8.3                     | 62.26                    | 3.6                    |
| 53                 | 71        | 8                       | 60.00                    | 3.3                    |
| 56                 | 74        | 8.2                     | 61.51                    | 3.5                    |
| 67                 | 66        | 8.4                     | 63.01                    | 2.9                    |
| 71                 | 68        | 9.5                     | 71.26                    | 3.9                    |
| 64                 | 68        | 10.3                    | 77.26                    | 4.6                    |
| 60                 | 64        | 10.3                    | 77.26                    | 4.4                    |
| 56                 | 63        | 10.4                    | 78.01                    | 4.3                    |
| 50                 | 58        | 10.4                    | 78.01                    | 4.3                    |
| 48                 | 53        | 10.5                    | 78.76                    | 4.2                    |
| 54                 | 62        | 11.3                    | 84.76                    | 6.9                    |
| 58                 | 65        | 11.7                    | 87.76                    | 7.3                    |
| 54                 | 60        | 11.1                    | 83.26                    | 6.8                    |
| 51                 | 57        | 10.6                    | 79.51                    | 6.4                    |
| 49                 | 55        | 10.3                    | 77.26                    | 5.9                    |
| 46                 | 52        | 9.9                     | 74.26                    | 5.7                    |
| 42                 | 48        | 9.6                     | 72.01                    | 5.4                    |
| 59                 | 68        | 16.9                    | 126.76                   | 11.9                   |
| 60                 | 70        | 15.8                    | 118.51                   | 10.5                   |

|    |    |      |        |      |
|----|----|------|--------|------|
| 58 | 68 | 14.6 | 109.51 | 9.3  |
| 54 | 62 | 14.1 | 105.76 | 8.8  |
| 51 | 58 | 13.3 | 99.76  | 7.8  |
| 50 | 56 | 12.9 | 96.76  | 7.4  |
| 49 | 56 | 12.7 | 95.26  | 7.2  |
| 46 | 54 | 11.3 | 84.76  | 7.2  |
| 47 | 54 | 12.4 | 93.01  | 8.2  |
| 49 | 56 | 12.5 | 93.76  | 8.4  |
| 40 | 46 | 12.1 | 90.76  | 8.1  |
| 37 | 43 | 12.1 | 90.76  | 8.1  |
| 35 | 40 | 13   | 97.51  | 8    |
| 41 | 48 | 12.4 | 93.01  | 8.3  |
| 42 | 48 | 9.8  | 73.51  | 4.5  |
| 41 | 46 | 9.5  | 71.26  | 4.5  |
| 57 | 66 | 9    | 67.51  | 4.4  |
| 53 | 60 | 9.4  | 70.51  | 4.4  |
| 42 | 45 | 9.3  | 69.76  | 4.5  |
| 53 | 62 | 9.5  | 71.26  | 4.8  |
| 45 | 50 | 9.3  | 69.76  | 4.7  |
| 41 | 50 | 11.7 | 87.76  | 7.1  |
| 40 | 49 | 13.4 | 100.51 | 8.9  |
| 38 | 48 | 14.5 | 108.76 | 10.1 |
| 36 | 46 | 16.6 | 124.51 | 12.2 |
| 35 | 43 | 18.4 | 138.01 | 14.2 |
| 34 | 41 | 19.3 | 144.76 | 15.5 |
| 30 | 37 | 21.9 | 164.26 | 18.3 |
| 33 | 40 | 20.9 | 156.76 | 17   |
| 28 | 34 | 23.7 | 177.76 | 20.4 |
| 26 | 34 | 26.6 | 199.52 | 23.5 |
| 23 | 31 | 29.1 | 218.27 | 26.4 |
| 39 | 43 | 11.7 | 87.76  | 7.7  |
| 36 | 41 | 12.3 | 92.26  | 7.9  |
| 33 | 39 | 14.3 | 107.26 | 9.9  |
| 32 | 38 | 15.5 | 116.26 | 11.2 |
| 33 | 39 | 18   | 135.01 | 13.5 |
| 29 | 33 | 19.5 | 146.26 | 16.3 |
| 27 | 31 | 21.5 | 161.26 | 18.6 |
| 44 | 50 | 10.2 | 76.51  | 5.6  |
| 43 | 54 | 9.8  | 73.51  | 4.6  |
| 48 | 58 | 10   | 75.01  | 4.4  |
| 43 | 50 | 10   | 75.01  | 4.4  |
| 40 | 47 | 10.2 | 76.51  | 4.5  |
| 37 | 43 | 10.3 | 77.26  | 4.3  |
| 31 | 37 | 15   | 112.51 | 8.6  |
| 35 | 41 | 11.4 | 85.51  | 5.2  |
| 33 | 41 | 13.4 | 100.51 | 6.8  |
| 33 | 40 | 12.4 | 93.01  | 6.2  |
| 32 | 40 | 14.5 | 108.76 | 7.7  |
| 42 | 50 | 10   | 75.01  | 5    |
| 35 | 42 | 10.4 | 78.01  | 6.4  |
| 36 | 41 | 10.7 | 80.26  | 7.1  |

|    |     |       |        |      |
|----|-----|-------|--------|------|
| 34 | 39  | 11.2  | 84.01  | 7.7  |
| 31 | 35  | 11.4  | 85.51  | 8.2  |
| 29 | 34  | 12.4  | 93.01  | 9.3  |
| 27 | 33  | 12.3  | 92.26  | 9.3  |
| 27 | 34  | 12    | 90.01  | 9    |
| 26 | 33  | 11.9  | 89.26  | 8.9  |
| 25 | 32  | 11.5  | 86.26  | 8.6  |
| 26 | 33  | 11.4  | 85.51  | 8.4  |
| 25 | 32  | 11.3  | 84.76  | 8.6  |
| 37 | 43  | 13.4  | 100.51 | 9    |
| 31 | 36  | 13.4  | 100.51 | 9.3  |
| 34 | 40  | 13    | 97.51  | 9    |
| 33 | 39  | 12.2  | 91.51  | 8.2  |
| 31 | 37  | 12    | 90.01  | 7.9  |
| 31 | 37  | 12.1  | 90.76  | 8.1  |
| 30 | 36  | 12.3  | 92.26  | 8.3  |
| 27 | 33  | 15.2  | 114.01 | 11.1 |
| 28 | 33  | 12.6  | 94.51  | 8.6  |
| 27 | 33  | 13.3  | 99.76  | 9.3  |
| 26 | 32  | 14.2  | 106.51 | 10.3 |
| 45 | 53  | 11.6  | 87.01  | 7.1  |
| 45 | 51  | 12.6  | 94.51  | 7.8  |
| 40 | 46  | 17.7  | 132.76 | 13.1 |
| 38 | 46  | 17.7  | 132.76 | 13.2 |
| 36 | 44  | 20.5  | 153.76 | 16.1 |
| 36 | 44  | 21.5  | 161.26 | 17.1 |
| 38 | 45  | 23.3  | 174.76 | 19.1 |
| 39 | 44  | 25.8  | 193.52 | 22   |
| 47 | 54  | 9.7   | 72.76  | 5    |
| 44 | 52  | 11.6  | 87.01  | 7.5  |
| 44 | 52  | 13.9  | 104.26 | 9.5  |
| 42 | 51  | 15.5  | 116.26 | 11.1 |
| 41 | 52  | 18.3  | 137.26 | 13.1 |
| 41 | 51  | 16.9  | 126.76 | 12   |
| 38 | 48  | 19.4  | 145.51 | 14   |
| 35 | 46  | 20.9  | 156.76 | 15.6 |
| 44 | 50  | 11.4  | 85.51  | 7    |
| 42 | 49  | 15.3  | 114.76 | 11.7 |
| 43 | 51  | 16.7  | 125.26 | 13   |
| 42 | 51  | 19.2  | 144.01 | 15.6 |
| 38 | 47  | 22.7  | 170.26 | 19   |
| 36 | 45  | 27.9  | 209.27 | 24.2 |
| 35 | 44  | 29.6  | 222.02 | 26   |
| 34 | 43  | 29.7  | 222.77 | 26   |
| 38 | 41  | 10.5  | 78.76  | 6.35 |
|    | 131 | 10.87 | 81.53  | 8.4  |
| 41 | 52  | 13.3  | 99.76  | 9.6  |
| 52 | 61  | 14    | 105.01 | 9.9  |
| 49 | 61  | 15    | 112.51 | 11.4 |
| 31 | 36  | 15.5  | 116.26 | 11   |
| 31 | 37  | 16.3  | 122.26 | 11.5 |
| 30 | 35  | 16.9  | 126.76 | 12.6 |

|    |    |      |        |      |
|----|----|------|--------|------|
| 57 | 68 | 10.8 | 81.01  | 6.3  |
| 54 | 64 | 11.1 | 83.26  | 6.7  |
| 45 | 53 | 10.8 | 81.01  | 6.9  |
| 45 | 49 | 11.2 | 84.01  | 7.4  |
| 45 | 50 | 11.7 | 87.76  | 7.7  |
| 41 | 47 | 12.1 | 90.76  | 8.1  |
| 40 | 45 | 12.9 | 96.76  | 8.9  |
| 38 | 43 | 13.3 | 99.76  | 9.3  |
| 46 | 51 | 11.9 | 89.26  | 6.6  |
| 50 | 60 | 12.8 | 96.01  | 8.5  |
| 54 | 64 | 13.9 | 104.26 | 9    |
| 45 | 53 | 14.6 | 109.51 | 9.6  |
| 42 | 51 | 16.1 | 120.76 | 11.2 |
| 37 | 44 | 17.7 | 132.76 | 12.6 |
| 38 | 45 | 18.6 | 139.51 | 14   |
| 36 | 42 | 19.5 | 146.26 | 15.3 |
| 34 | 40 | 21.6 | 162.01 | 17.6 |
| 33 | 40 | 23.4 | 175.51 | 20.1 |
| 26 | 34 | 25.7 | 192.77 | 22.1 |
| 41 | 45 | 11.4 | 85.51  | 6.4  |
| 40 | 46 | 13.3 | 99.76  | 9    |
| 38 | 45 | 15.1 | 113.26 | 10.9 |
| 36 | 45 | 16.2 | 121.51 | 11.7 |
| 35 | 42 | 16.4 | 123.01 | 11.8 |
| 34 | 41 | 16.3 | 122.26 | 12.2 |
| 35 | 42 | 16   | 120.01 | 12.1 |
| 34 | 41 | 15.7 | 117.76 | 11.9 |
| 32 | 40 | 15.9 | 119.26 | 12.1 |
| 31 | 39 | 15.9 | 119.26 | 12.4 |
| 30 | 37 | 16.3 | 122.26 | 13.3 |
| 27 | 34 | 16.8 | 126.01 | 14.1 |
| 42 | 50 | 9.3  | 69.76  | 5.6  |
| 39 | 48 | 10.7 | 80.26  | 6.8  |
| 37 | 46 | 13.2 | 99.01  | 9.5  |
| 36 | 44 | 14.8 | 111.01 | 11.3 |
| 50 | 63 | 15.2 | 114.01 | 10.6 |
| 36 | 48 | 15   | 112.51 | 10.2 |
| 33 | 41 | 15.5 | 116.26 | 11.9 |
| 34 | 43 | 15.6 | 117.01 | 11.8 |
| 30 | 39 | 16   | 120.01 | 12.4 |
| 28 | 37 | 16.1 | 120.76 | 12.8 |
| 27 | 33 | 16.2 | 121.51 | 13.2 |
| 37 | 46 | 15.7 | 117.76 | 12.2 |
| 47 | 53 | 12.5 | 93.76  | 8    |
| 42 | 48 | 13.8 | 103.51 | 9.9  |
| 45 | 52 | 15.3 | 114.76 | 11.5 |
| 40 | 48 | 16.3 | 122.26 | 12.6 |
| 40 | 48 | 19.1 | 143.26 | 15.5 |
| 36 | 44 | 20.9 | 156.76 | 17.6 |
| 29 | 38 | 20.9 | 156.76 | 18   |
| 26 | 35 | 19.4 | 145.51 | 17.4 |
| 29 | 36 | 18.3 | 137.26 | 15.6 |

|    |    |      |        |      |
|----|----|------|--------|------|
| 44 | 64 | 18.4 | 138.01 | 13.7 |
| 29 | 33 | 17.6 | 132.01 | 15.7 |
| 31 | 40 | 17.9 | 134.26 | 14.9 |
| 47 | 58 | 8.1  | 60.75  | 4    |
| 43 | 47 | 10.2 | 76.51  | 6.6  |
| 38 | 43 | 12.4 | 93.01  | 8.8  |
| 36 | 42 | 14.4 | 108.01 | 11   |
| 40 | 43 | 16.8 | 126.01 | 13.5 |
| 34 | 39 | 19.2 | 144.01 | 16.1 |
| 36 | 41 | 21.6 | 162.01 | 18.4 |
| 31 | 36 | 23.7 | 177.76 | 20.5 |
| 31 | 37 | 26.1 | 195.77 | 23   |
| 32 | 36 | 28.5 | 213.77 | 25.9 |
| 28 | 32 | 29.5 | 221.27 | 27.4 |
|    | 26 | 29.5 | 221.27 | 28.1 |
| 54 | 68 | 15.8 | 118.51 | 12.3 |
| 51 | 60 | 19.4 | 145.51 | 16.3 |
| 45 | 54 | 22.5 | 168.76 | 19.5 |
| 40 | 48 | 29.9 | 224.27 | 28.2 |
| 40 | 50 | 29.7 | 222.77 | 27.5 |
| 39 | 47 | 30   | 225.02 | 27.6 |
| 37 | 44 | 26   | 195.02 | 23.4 |
|    | 0  | 28.5 | 213.77 | 24.2 |
|    | 86 | 17   | 127.51 | 11.8 |
| 62 | 74 | 16.7 | 125.26 | 12.1 |
| 54 | 62 | 16.1 | 120.76 | 12.1 |
| 52 | 58 | 14.4 | 108.01 | 9.7  |
| 42 | 49 | 17.5 | 131.26 | 14.2 |
| 41 | 50 | 15.8 | 118.51 | 11.7 |
| 37 | 42 | 15.3 | 114.76 | 12.4 |
| 47 | 54 | 12.7 | 95.26  | 9.2  |
| 46 | 53 | 23.1 | 173.26 | 19.6 |
| 46 | 53 | 18.6 | 139.51 | 14.5 |
| 44 | 49 | 26.4 | 198.02 | 22.9 |
| 42 | 48 | 28.8 | 216.02 | 25.7 |
| 41 | 47 | 30   | 225.02 | 26   |
| 34 | 40 | 30   | 225.02 | 27.2 |
| 18 | 26 | 13.4 | 100.51 | 8.3  |
| 58 | 62 | 12.4 | 93.01  | 9.3  |
| 46 | 58 | 21.6 | 162.01 | 17.2 |
| 43 | 49 | 30   | 225.02 | 27.2 |
| 37 | 43 | 29.9 | 224.27 | 27.2 |
| 37 | 43 | 30   | 225.02 | 27   |
| 36 | 43 | 30   | 225.02 | 27   |
| 35 | 41 | 30   | 225.02 | 27   |
|    | 0  | 30   | 225.02 | 24.8 |
|    | 0  | 29.3 | 219.77 | 27.2 |
| 55 | 65 | 15.8 | 118.51 | 11.3 |
| 53 | 62 | 22.6 | 169.51 | 17.6 |
| 49 | 60 | 27.9 | 209.27 | 23.3 |
| 48 | 60 | 30   | 225.02 | 25   |
| 43 | 54 | 30   | 225.02 | 25   |

|    |     |      |        |      |
|----|-----|------|--------|------|
| 37 | 46  | 30   | 225.02 | 26   |
| 36 | 46  | 30   | 225.02 | 27   |
| 36 | 47  | 30   | 225.02 | 27.3 |
| 43 | 50  | 12.7 | 95.26  | 9.4  |
| 40 | 48  | 14.7 | 110.26 | 11.6 |
| 39 | 46  | 15.8 | 118.51 | 12.7 |
| 37 | 44  | 16.1 | 120.76 | 13.6 |
| 37 | 42  | 19   | 142.51 | 16.9 |
| 32 | 39  | 21.7 | 162.76 | 19.7 |
| 30 | 36  | 24.9 | 186.77 | 23   |
| 27 | 31  | 28.6 | 214.52 | 26.9 |
| 29 | 32  | 29.8 | 223.52 | 28.4 |
| 21 | 27  | 30   | 225.02 | 28.4 |
|    | 125 | 14.8 | 111.01 | 11.7 |
| 37 | 43  | 16.7 | 125.26 | 12.5 |
| 35 | 42  | 18.1 | 135.76 | 15.3 |
| 30 | 37  | 18.4 | 138.01 | 15.7 |
| 29 | 31  | 19   | 142.51 | 16.9 |
| 20 | 21  | 19.8 | 148.51 | 18.5 |
| 48 | 56  | 13   | 97.51  | 9.2  |
| 45 | 54  | 15.5 | 116.26 | 11.6 |
| 45 | 54  | 17.5 | 131.26 | 14.1 |
| 43 | 52  | 19.4 | 145.51 | 16.2 |
| 42 | 51  | 21.3 | 159.76 | 18.2 |
| 38 | 46  | 22.4 | 168.01 | 19.5 |
| 40 | 49  | 24   | 180.01 | 21.3 |
| 37 | 47  | 24.9 | 186.77 | 21.9 |
| 36 | 45  | 26.6 | 199.52 | 23.8 |
| 14 | 19  | 27.6 | 207.02 | 24.1 |
| 38 | 47  | 27.5 | 206.27 | 24.8 |
| 37 | 47  | 28.2 | 211.52 | 25.8 |
| 63 | 70  |      |        |      |
| 48 | 60  |      |        |      |
| 56 | 61  |      |        |      |
| 54 | 62  |      |        |      |
| 53 | 63  |      |        |      |
| 51 | 62  |      |        |      |
| 54 | 66  |      |        |      |
| 56 | 69  |      |        |      |
| 38 | 45  |      |        |      |
| 46 | 60  |      |        |      |
| 10 | 10  |      |        |      |
| 34 | 44  |      |        |      |
| 49 | 55  |      |        |      |
| 48 | 55  |      |        |      |
| 47 | 55  |      |        |      |
| 40 | 48  |      |        |      |
| 38 | 46  |      |        |      |
| 37 | 46  |      |        |      |
| 37 | 44  |      |        |      |



|    |    |      |        |      |
|----|----|------|--------|------|
| 41 | 50 |      |        |      |
| 41 | 51 |      |        |      |
| 29 | 34 |      |        |      |
| 33 | 35 |      |        |      |
| 45 | 48 | 8.6  | 64.51  | 4.9  |
| 41 | 44 | 9    | 67.51  | 5.1  |
| 39 | 48 | 8.7  | 65.26  | 6.1  |
| 33 | 43 | 8.2  | 61.51  | 6.7  |
| 23 | 30 | 7.8  | 58.50  | 6.7  |
| 30 | 37 | 8.2  | 61.51  | 6.7  |
| 40 | 48 | 9.2  | 69.01  | 2.9  |
| 39 | 45 | 9.5  | 71.26  | 3.8  |
| 37 | 43 | 9.7  | 72.76  | 4.1  |
| 35 | 41 | 9.7  | 72.76  | 4.2  |
| 33 | 39 | 9.5  | 71.26  | 3.8  |
| 35 | 41 | 9.7  | 72.76  | 3.5  |
| 51 | 57 | 9.2  | 69.01  | 1.6  |
| 52 | 56 | 10   | 75.01  | 1.5  |
| 46 | 49 | 10.9 | 81.76  | 2    |
| 39 | 44 | 11.6 | 87.01  | 2    |
| 43 | 47 | 12.7 | 95.26  | 3.3  |
| 50 | 55 | 12.2 | 91.51  | 3    |
| 37 | 50 | 9.2  | 69.01  | 3.5  |
| 54 | 64 | 8.8  | 66.01  | 4    |
| 38 | 51 | 8.9  | 66.76  | 3    |
| 54 | 66 | 8.4  | 63.01  | 3.1  |
| 46 | 57 | 8.8  | 66.01  | 3.3  |
| 39 | 51 | 9    | 67.51  | 3.5  |
| 45 | 52 | 8.8  | 66.01  | 4.7  |
| 22 | 28 | 17.4 | 130.51 | 13.2 |
| 25 | 32 | 16.2 | 121.51 | 12.3 |
| 42 | 50 | 12.1 | 90.76  | 8.1  |
| 23 | 29 | 18.2 | 136.51 | 14.9 |
| 28 | 34 | 14.4 | 108.01 | 11.2 |
| 24 | 29 | 19   | 142.51 | 16.6 |
| 22 | 27 | 19.6 | 147.01 | 17.3 |
| 74 | 84 | 10.1 | 75.76  | 6    |
|    | 93 | 10   | 75.01  | 6    |
| 60 | 69 | 9.2  | 69.01  | 5.2  |
| 58 | 67 | 9.8  | 73.51  | 5.7  |
| 52 | 62 | 8.3  | 62.26  | 4.3  |
| 59 | 68 | 8.5  | 63.76  | 4.6  |
| 59 | 69 | 8.8  | 66.01  | 4.9  |
| 58 | 68 | 8.8  | 66.01  | 4.8  |
| 51 | 61 | 8.5  | 63.76  | 4.4  |
| 47 | 57 | 9    | 67.51  | 4.8  |
| 43 | 54 | 9.4  | 70.51  | 5.1  |
| 41 | 52 | 10.1 | 75.76  | 5.4  |
| 48 | 53 | 12.8 | 96.01  | 8.8  |
| 52 | 62 | 12.6 | 94.51  | 8.6  |

|    |    |      |        |      |
|----|----|------|--------|------|
| 41 | 49 | 11.9 | 89.26  | 8.4  |
| 34 | 41 | 11   | 82.51  | 7.9  |
| 31 | 36 | 10   | 75.01  | 7.4  |
| 30 | 35 | 9.2  | 69.01  | 6.9  |
| 30 | 35 | 8.4  | 63.01  | 6.3  |
| 30 | 34 | 7.7  | 57.75  | 5.7  |
| 30 | 35 | 7    | 52.50  | 5.1  |
| 25 | 29 | 6.4  | 48.00  | 3.6  |
| 25 | 29 | 6.1  | 45.75  | 3.5  |
| 26 | 25 | 5.8  | 43.50  | 3.4  |
| 50 | 59 | 10.8 | 81.01  | 7.1  |
| 51 | 60 | 10.2 | 76.51  | 6.5  |
| 50 | 60 | 9.8  | 73.51  | 6.1  |
| 47 | 57 | 9.3  | 69.76  | 5.7  |
| 45 | 54 | 8.9  | 66.76  | 5.4  |
| 42 | 51 | 8.5  | 63.76  | 5    |
| 41 | 49 | 8.1  | 60.75  | 4.6  |
| 39 | 47 | 8.1  | 60.75  | 4.5  |
| 41 | 48 | 8.1  | 60.75  | 4.6  |
| 37 | 45 | 8    | 60.00  | 4.9  |
| 36 | 43 | 7.5  | 56.25  | 4.5  |
| 34 | 39 | 9.8  | 73.51  | 6.5  |
| 35 | 39 | 8.8  | 66.01  | 5.6  |
| 34 | 39 | 7.9  | 59.25  | 5    |
| 32 | 38 | 7.6  | 57.00  | 4.7  |
| 32 | 37 | 7.6  | 57.00  | 4.8  |
| 33 | 36 | 8.7  | 65.26  | 6.1  |
| 34 | 36 | 11.1 | 83.26  | 8.6  |
| 34 | 36 | 11.8 | 88.51  | 9.4  |
| 31 | 33 | 11.9 | 89.26  | 9.6  |
| 31 | 31 | 11.5 | 86.26  | 9.4  |
| 31 | 33 | 11.4 | 85.51  | 9.3  |
| 37 | 42 | 18.2 | 136.51 | 14.6 |
| 63 | 70 | 19.6 | 147.01 | 16.1 |
| 62 | 70 | 20.9 | 156.76 | 17.6 |
| 58 | 66 | 21.7 | 162.76 | 18.2 |
| 52 | 59 | 18.7 | 140.26 | 14.6 |
| 55 | 61 | 19.7 | 147.76 | 15.4 |
| 49 | 56 | 18.4 | 138.01 | 14.4 |
| 60 | 68 | 20.8 | 156.01 | 17.1 |
| 73 | 87 | 20.9 | 156.76 | 14.9 |
| 72 | 85 | 21.9 | 164.26 | 16.9 |
| 68 | 79 | 22.7 | 170.26 | 17.9 |
| 29 | 35 | 24.3 | 182.26 | 21.2 |
| 78 | 93 | 20.7 | 155.26 | 14.4 |
| 72 | 82 | 18.8 | 141.01 | 13.5 |
| 68 | 75 | 14.5 | 108.76 | 9.8  |
| 78 | 87 | 11.5 | 86.26  | 7.2  |
| 51 | 68 | 9.2  | 69.01  | 4.3  |
| 55 | 70 | 10.2 | 76.51  | 6.4  |
| 61 | 74 | 8.5  | 63.76  | 3.7  |

|    |     |      |        |      |
|----|-----|------|--------|------|
| 51 | 65  | 9    | 67.51  | 4.2  |
| 55 | 72  | 8.5  | 63.76  | 3.9  |
| 53 | 64  | 9.5  | 71.26  | 5.6  |
| 64 | 82  | 9.6  | 72.01  | 6.4  |
| 51 | 63  | 8.7  | 65.26  | 4.5  |
| 73 | 81  | 13.5 | 101.26 | 9.5  |
| 56 | 63  | 15.7 | 117.76 | 11   |
| 56 | 63  | 17.8 | 133.51 | 13.2 |
| 53 | 69  | 19.3 | 144.76 | 14.9 |
| 45 | 52  | 20   | 150.01 | 15.7 |
| 40 | 44  | 19.9 | 149.26 | 16   |
| 36 | 42  | 19.4 | 145.51 | 15.6 |
| 34 | 40  | 19   | 142.51 | 15.1 |
| 49 | 56  | 12.7 | 95.26  | 9.8  |
|    | 130 | 14.4 | 108.01 | 10.3 |
| 54 | 63  | 15   | 112.51 | 11.6 |
| 43 | 51  | 15.6 | 117.01 | 12.3 |
| 42 | 51  | 16.3 | 122.26 | 12.3 |
| 58 | 69  | 17.1 | 128.26 | 13.8 |
| 39 | 46  | 17.9 | 134.26 | 14   |
| 38 | 45  | 17.5 | 131.26 | 14   |

DIASTOLIC BP(mmHg)    MAP(mmHg)    PgCO<sub>2</sub>(Kpa)    PgCO<sub>2</sub>(mmHg)    P(g-Et)CO<sub>2</sub>

| pH (gastric tonometry) | EtCO <sub>2</sub> (mmHg) | PCO <sub>2</sub> (gap) | PCCO | PCCI(l/min/m <sup>2</sup> ) | PPV(%) | SV   |
|------------------------|--------------------------|------------------------|------|-----------------------------|--------|------|
| 7.10                   | 38                       | 7.2                    | 3.51 | 5.81                        | 10     | 31.7 |
| 7.09                   | 36                       | 8.1                    | 2.96 | 4.9                         | 12     | 29.3 |
| 7.01                   | 38                       | 10.2                   | 3.34 | 5.53                        | 11     | 30.6 |
| 7.08                   | 43                       | 8.2                    | 3.06 | 5.07                        | 16     | 31.2 |
| 7.17                   | 44                       | 4.9                    | 2.69 | 4.45                        |        | 27.9 |
| 7.21                   | 45                       | 4                      | 3.03 | 5.02                        | 16     | 32.1 |
| 7.23                   | 41                       | 3                      | 2.51 | 4.16                        | 15     | 29   |
| 7.20                   | 40                       | 2.79                   | 2.79 | 5.71                        | 25     | 23.9 |
| 7.17                   | 40                       | 3.27                   | 2.65 | 5.42                        | 24     | 24.2 |
| 7.22                   | 37                       | 2.72                   | 2.52 | 5.15                        | 16     | 23.3 |
| 7.24                   | 36                       | 2.87                   | 2.62 | 5.36                        | 17     | 23.9 |
| 7.26                   | 37                       | 2.41                   | 2.61 | 5.34                        | 16     | 23.2 |
| 7.25                   | 36                       | 2.6                    | 2.48 | 5.07                        | 19     | 23.6 |
| 7.25                   | 37                       | 1.83                   | 2.23 | 4.56                        | 11     | 21.2 |
| 7.24                   | 40                       | 3.72                   | 2.52 | 4.36                        | 20     | 16   |
| 7.22                   | 40                       | 3.99                   | 2.62 | 3.74                        | 19     | 18   |
| 7.19                   | 37                       | 4.58                   | 2.25 | 4.01                        | 17     | 23   |
| 7.21                   | 41                       | 4.07                   | 2.17 | 3.73                        | 17     | 25   |
| 7.22                   | 38                       | 3.83                   | 2.05 | 3.89                        | 19     | 25   |
| 7.20                   | 37                       | 4.03                   | 1.96 | 3.43                        | 10     | 22.2 |
| 7.20                   | 38                       | 3.76                   | 2.2  | 3.73                        | 17     | 23   |
| 7.26                   | 36                       | 2.66                   | 2.35 | 3.89                        | 28     | 21.2 |
| 7.26                   | 35                       | 2.83                   | 2.26 | 3.74                        | 25     | 20.4 |
| 7.25                   | 35                       | 3.1                    | 2.32 | 3.84                        | 23     | 21   |
| 7.26                   | 37                       | 2.82                   | 2.18 | 3.61                        | 22     | 21.3 |
| 7.26                   | 38                       | 2.78                   | 2.13 | 3.53                        | 21     | 23.2 |
| 7.28                   | 37                       | 2.33                   | 1.89 | 3.13                        | 25     | 23   |
| 7.25                   | 34                       | 3.13                   | 1.88 | 3.11                        | 21     | 23.1 |
| 7.29                   | 37                       | 3.06                   | 2.43 | 3.76                        | 11     | 22.1 |
| 7.30                   | 38                       | 2.57                   | 2.97 | 4.6                         | 15     | 24.3 |
| 7.30                   | 37                       | 2.91                   | 2.58 | 3.99                        | 14     | 21.7 |
| 7.32                   | 37                       | 2.55                   | 2.74 | 4.24                        | 16     | 21.6 |
| 7.30                   | 37                       | 2.61                   | 2.6  | 4.03                        | 13     | 20.3 |
| 7.33                   | 38                       | 2.07                   | 2.77 | 4.29                        | 19     | 22.4 |
| 7.32                   | 37                       | 2.49                   | 2.74 | 4.24                        | 18     | 21.8 |
| 7.23                   | 45                       | 8.4                    | 1.26 | 1.73                        | 22     | 8    |
| 7.13                   | 45                       | 6.2                    | 1.06 | 1.45                        | 36     | 7    |
| 7.14                   | 46                       | 9.9                    | 1.28 | 2.05                        |        | 10   |
| 7.17                   | 47                       | 8.4                    | 1.64 | 2.16                        |        | 20   |
| 7.18                   | 49                       | 10.2                   | 1.78 | 2.45                        | 35     | 15   |
| 7.19                   | 50                       | 8.8                    | 1.64 | 2.37                        | 29     | 13   |
| 7.21                   | 50                       | 10.5                   | 1.84 | 2.11                        | 22     | 18   |
| 7.14                   | 36                       | 13                     | 1.21 | 0.96                        | 26     | 15   |
| 7.18                   | 35                       | 13.6                   | 1.5  | 1.93                        | 37     | 9    |
| 7.20                   | 35                       | 13.2                   | 0.94 | 1.72                        | 27     | 11   |
| 7.21                   | 34                       | 11.6                   | 1.42 | 1.73                        | 26     | 27   |
| 7.21                   | 34                       | 12.6                   | 1.28 | 1.65                        | 25     | 15   |
| 7.21                   | 34                       | 10.9                   | 1.25 | 1.65                        | 27     | 14   |
| 7.24                   | 34                       | 11.7                   | 1.33 | 1.6                         | 27     | 22   |
| 6.97                   | 41                       | 15.3                   | 1.7  | 2.18                        | 25     | 20   |
| 7.03                   | 42                       | 14.7                   | 1.75 | 2.39                        | 25     | 20   |

|      |    |      |      |      |    |    |
|------|----|------|------|------|----|----|
| 7.08 | 43 | 18.7 | 1.49 | 2.32 | 26 | 21 |
| 7.10 | 43 | 14.3 | 1.67 | 2.14 | 28 | 18 |
| 7.18 | 43 | 16.9 | 1.54 | 2.02 | 29 | 16 |
| 7.20 | 45 | 11.8 | 1.7  | 2.23 | 29 | 18 |
| 7.14 | 46 | 14   | 1.77 | 2.32 | 28 | 19 |
| 7.12 | 32 | 12.1 | 1.17 | 1.54 | 16 | 16 |
| 7.07 | 35 | 12.4 | 1.06 | 1.3  | 17 | 13 |
| 7.08 | 34 | 13.5 | 0.9  | 1.22 | 21 | 12 |
| 7.11 | 32 | 12.4 | 0.89 | 1.33 | 26 | 12 |
| 7.09 | 32 | 12.2 | 0.99 | 1.27 | 27 | 15 |
| 7.09 | 32 | 13   | 0.89 | 1.31 | 28 | 10 |
| 7.15 | 33 | 12.8 | 0.89 | 1.25 | 24 | 12 |
| 7.20 | 43 | 9.8  | 1.69 |      | 20 | 12 |
| 7.20 | 40 | 10.8 | 1.08 | 2.38 | 23 | 9  |
| 7.23 | 37 | 11   | 1.43 | 2.25 | 21 | 15 |
| 7.23 | 41 | 8.3  | 1.56 | 2.38 | 26 | 13 |
| 7.23 | 39 | 12   | 1.09 | 1.55 | 28 | 10 |
| 7.22 | 38 | 10.5 | 1.37 | 2.05 | 22 | 13 |
| 7.22 | 38 | 10.2 | 1.3  | 1.71 | 26 | 9  |
| 7.15 | 36 | 4.9  | 1.44 | 1.62 | 20 | 16 |
| 7.03 | 37 | 7.5  | 1.62 | 2.03 | 21 | 18 |
| 7.08 | 35 | 7.2  | 1.75 | 2.1  | 23 | 19 |
| 7.00 | 36 | 9.6  | 1.79 | 2.14 | 24 | 20 |
| 6.96 | 35 | 11.4 | 1.71 | 2.1  | 24 | 20 |
| 6.93 | 30 | 13.1 | 1.3  | 1.94 | 25 | 19 |
| 6.89 | 29 | 15.6 | 1.28 | 1.63 | 27 | 18 |
| 6.92 | 30 | 14.6 | 1.38 | 1.89 | 27 | 18 |
| 6.86 | 26 | 17.6 | 1.37 | 1.67 | 27 | 15 |
| 6.75 | 25 | 21.4 | 0.77 | 1.21 | 18 | 19 |
| 6.72 | 22 | 24.2 | 0.89 | 1.05 | 18 | 22 |
| 7.15 | 33 | 4.8  | 1.07 | 1.81 | 21 | 9  |
| 7.11 | 36 | 5.9  | 1.55 | 2.18 | 23 | 11 |
| 7.05 | 35 | 7.8  | 1.62 | 2.08 | 26 | 10 |
| 6.98 | 32 | 8.9  | 1.5  | 2.21 | 31 | 10 |
| 6.93 | 35 | 12.0 | 1.63 | 2.2  | 31 | 11 |
| 6.88 | 26 | 14.1 | 0.98 | 0.99 | 38 | 8  |
| 6.81 | 22 | 16.6 | 0.8  | 1.32 | 37 | 7  |
| 7.23 | 37 | 3.0  | 0.97 | 1.22 | 22 | 23 |
| 7.24 | 42 | 1.8  | 0.98 | 1.58 | 18 | 27 |
| 7.25 | 44 | 1.2  | 1.3  | 1.94 | 19 | 25 |
| 7.23 | 44 | 1.6  | 1.01 | 1.45 | 21 | 17 |
| 7.22 | 47 | 1.2  | 1.17 | 1.88 | 22 | 21 |
| 7.24 | 48 | 0.9  | 1.36 | 1.76 | 23 | 18 |
| 7.09 | 51 | 4.8  | 1.56 | 2.18 | 23 | 21 |
| 7.22 | 49 | 1.6  | 1.24 | 1.9  | 27 | 18 |
| 7.13 | 53 | 3.0  | 1.46 | 2.03 | 22 | 19 |
| 7.17 | 50 | 2.4  | 1.34 | 2.18 | 25 | 21 |
| 7.11 | 54 | 3.2  | 1.41 | 2.1  | 21 | 21 |
| 7.22 | 34 | 3.9  | 1.28 | 1.6  | 20 | 15 |
| 7.20 | 32 | 4.6  | 1.11 | 1.47 | 28 | 15 |
| 7.18 | 29 | 5.0  | 1.35 | 1.57 | 29 | 15 |

|      |    |      |      |      |    |    |
|------|----|------|------|------|----|----|
| 7.16 | 28 | 5.7  | 1.44 | 1.86 | 28 | 14 |
| 7.17 | 26 | 6.0  | 1.35 | 1.73 | 30 | 14 |
| 7.11 | 25 | 7.2  | 1.26 | 1.57 | 26 | 13 |
| 7.12 | 24 | 7.0  | 1.41 | 1.74 | 26 | 13 |
| 7.10 | 24 | 6.8  | 1.55 | 1.91 | 22 | 13 |
| 7.10 | 24 | 6.5  | 1.2  | 1.82 | 24 | 13 |
| 7.09 | 23 | 6.3  | 1.13 | 1.51 | 25 | 13 |
| 7.10 | 24 | 5.8  | 1.22 | 1.78 | 24 | 12 |
| 7.06 | 23 | 5.9  | 1.26 | 1.46 | 20 | 11 |
| 7.12 | 35 | 6.1  | 0.84 | 1.3  | 26 | 10 |
| 7.12 | 32 | 6.1  | 0.77 | 1.14 | 31 | 10 |
| 7.12 | 33 | 5.9  | 0.87 | 1.3  | 29 | 11 |
| 7.14 | 32 | 5.1  | 0.93 | 1.26 | 29 | 14 |
| 7.13 | 32 | 5.3  | 0.9  | 1.37 | 30 | 13 |
| 7.14 | 32 | 4.7  | 0.89 | 1.29 | 30 | 13 |
| 7.16 | 32 | 5.0  | 0.88 | 1.24 | 30 | 14 |
| 7.06 | 33 | 7.2  | 0.97 | 1.3  | 27 | 12 |
| 7.13 | 32 | 5.2  | 0.86 | 1.33 | 29 | 13 |
| 7.10 | 32 | 5.8  | 0.91 | 1.32 | 28 | 14 |
| 7.08 | 32 | 6.6  | 0.91 | 1.26 | 28 | 13 |
| 7.10 | 36 | 4.4  | 0.66 | 1.07 | 22 | 11 |
| 7.10 | 37 | 5.4  | 1.01 | 1.61 | 21 | 11 |
| 7.10 | 34 | 10.2 | 1.29 | 1.56 | 22 | 12 |
| 6.96 | 36 | 10.2 | 1.31 | 1.73 | 21 | 12 |
| 6.89 | 35 | 12.8 | 1.48 | 1.86 | 23 | 14 |
| 6.88 | 37 | 13.7 | 1.36 | 1.88 | 24 | 13 |
| 6.81 | 34 | 16.3 | 1.15 | 1.8  | 29 | 13 |
| 6.72 | 29 | 19.7 | 1.05 | 1.16 |    | 10 |
| 7.23 | 34 | 3.2  | 1.3  | 1.51 | 24 | 14 |
| 7.15 | 33 | 4.8  | 1.29 | 1.98 | 25 | 13 |
| 7.07 | 34 | 6.7  | 1.69 | 1.86 | 24 | 17 |
| 7.03 | 35 | 8.0  | 1.79 | 2.39 | 25 | 17 |
| 6.94 | 41 | 10.5 | 2.15 | 2.59 | 24 | 18 |
| 6.99 | 39 | 9.0  | 1.81 | 2.76 | 23 | 18 |
| 6.89 | 44 | 11.4 | 2.14 | 2.93 | 23 | 17 |
| 6.89 | 43 | 12.6 | 2.13 | 2.99 | 25 | 17 |
| 7.18 | 27 | 6.2  | 1.03 | 1.55 | 21 | 12 |
| 7.11 | 29 | 8.4  | 1.3  | 1.99 | 22 | 12 |
| 7.01 | 29 | 10.5 | 1.36 | 2.04 | 21 | 10 |
| 7.00 | 28 | 11.7 | 1.57 | 2.33 | 19 | 11 |
| 6.86 | 31 | 16.3 | 1.6  | 2.43 | 20 | 12 |
| 6.96 | 30 | 20.7 | 1.63 | 2.39 | 21 | 12 |
| 6.74 | 29 | 23.0 | 1.59 | 2.49 | 24 | 13 |
| 6.89 | 27 | 22.9 | 1.6  | 2.39 | 26 | 12 |
| 7.17 | 41 | 3.6  | 0.77 | 1.04 |    | 12 |
| 7.13 | 51 | 3.9  | 1.98 | 2.54 |    | 12 |
| 7.09 | 35 | 4.4  | 1.64 | 1.71 | 14 | 10 |
| 7.04 | 41 | 5.5  | 1.51 | 2.28 | 17 | 10 |
| 6.97 | 43 | 7.2  | 1.71 | 2.24 | 18 | 15 |
| 6.94 | 29 | 9.2  | 0.9  | 1.78 | 45 | 10 |
| 6.89 | 29 | 10.1 | 1.07 | 1.74 | 39 | 13 |
| 6.89 | 28 | 10.8 | 1.03 | 1.4  | 43 | 12 |

|      |    |      |      |      |    |    |
|------|----|------|------|------|----|----|
| 7.18 | 36 | 4.3  | 1.15 | 1.94 | 24 | 14 |
| 7.18 | 34 | 4.3  | 1.31 | 1.89 | 22 | 16 |
| 7.16 | 31 | 4.6  | 1.08 | 1.3  | 26 | 13 |
| 7.16 | 30 | 4.7  | 1.05 | 1.46 | 31 | 10 |
| 7.15 | 32 | 4.8  | 1.27 | 1.65 | 30 | 12 |
| 7.11 | 33 | 5.3  | 1.42 | 1.69 | 28 | 12 |
| 7.09 | 32 | 6.1  | 1.49 | 1.95 | 28 | 13 |
| 7.08 | 32 | 6.4  | 1.31 | 1.79 | 26 | 13 |
| 7.14 | 33 | 5.8  | 1.08 | 1.86 |    | 12 |
| 7.10 | 35 | 6.0  | 1.82 | 2.7  |    | 20 |
| 7.08 | 39 | 6.0  | 2.52 | 3.36 |    | 22 |
| 7.05 | 40 | 6.6  | 2.8  | 4    |    | 19 |
| 6.97 | 38 | 8.4  | 3.03 | 3.97 |    | 20 |
| 6.94 | 33 | 10.5 | 2.4  | 3.17 |    | 20 |
| 6.92 | 37 | 10.9 | 2.66 | 3.47 |    | 19 |
| 6.87 | 31 | 12.3 | 2.59 | 3.62 |    | 19 |
| 6.80 | 30 | 14.8 | 2.77 | 3.49 |    | 20 |
| 6.74 | 28 | 16.5 | 2.35 | 3.17 |    | 17 |
| 6.66 | 23 | 18.9 | 1.5  | 2.08 |    | 23 |
| 7.14 | 34 | 5.7  | 1.11 | 1.3  | 27 | 14 |
| 7.10 | 34 | 6.8  | 1.54 | 1.94 | 21 | 15 |
| 7.03 | 34 | 8.4  | 1.88 | 2.41 | 22 | 16 |
| 6.98 | 37 | 8.9  | 2.05 | 2.6  | 22 | 16 |
| 6.95 | 36 | 9.2  | 2.16 | 2.4  | 23 | 15 |
| 6.90 | 33 | 10.2 | 2.16 | 2.52 | 25 | 16 |
| 6.91 | 30 | 9.7  | 2.17 | 2.6  | 26 | 16 |
| 6.90 | 32 | 9.1  | 2.21 | 2.85 | 25 | 16 |
| 6.86 | 31 | 9.3  | 2.15 | 2.72 | 23 | 16 |
| 6.80 | 27 | 10.0 | 1.97 | 2.63 | 25 | 16 |
| 6.73 | 24 | 11.4 | 1.81 | 2.13 | 26 | 14 |
| 6.71 | 21 | 12.0 | 1.77 | 2.05 | 28 | 14 |
| 7.09 | 31 | 4.7  | 1.13 | 1.52 | 26 | 12 |
| 7.09 | 32 | 5.1  | 1.22 | 1.81 | 23 | 12 |
| 7.00 | 29 | 7.8  | 1.22 | 1.73 | 22 | 12 |
| 6.96 | 28 | 9.1  | 1.2  | 1.71 | 24 | 12 |
| 6.93 | 39 | 8.4  | 1.8  | 2.69 |    | 12 |
| 6.88 | 39 | 7.8  | 1.59 | 2.39 | 19 | 14 |
| 6.82 | 30 | 9.8  | 1.25 | 1.76 | 23 | 13 |
| 6.80 | 31 | 9.5  | 1.29 | 1.83 | 22 | 13 |
| 6.77 | 28 | 10.4 | 1.21 | 1.85 | 23 | 15 |
| 6.77 | 27 | 10.5 | 1.23 | 1.82 | 26 | 16 |
| 6.77 | 24 | 10.6 | 1.01 | 1.32 | 33 | 15 |
| 6.92 | 30 | 9.5  | 1.78 | 2.45 | 18 | 13 |
| 7.11 | 31 | 7.0  | 1.34 | 1.92 | 36 | 16 |
| 7.06 | 30 | 7.8  | 1.57 | 2.04 | 40 | 18 |
| 7.01 | 31 | 9.2  | 1.88 | 2.58 | 39 | 18 |
| 7.00 | 29 | 10.4 | 1.88 | 2.78 | 39 | 20 |
| 6.87 | 29 | 13.7 | 2.04 | 2.94 | 34 | 20 |
| 6.85 | 26 | 15.2 | 1.98 | 2.77 | 37 | 19 |
| 6.82 | 21 | 16.3 | 1.67 | 2.49 | 50 | 20 |
| 6.78 | 16 | 15.6 | 1.64 | 2.16 | 50 | 19 |
| 6.76 | 19 | 14.1 | 2.05 | 2.49 |    | 22 |

|      |       |      |      |      |    |    |
|------|-------|------|------|------|----|----|
| 6.78 | 37    | 11.3 | 2.91 |      |    | 25 |
| 6.71 | 14    | 13.4 | 2.45 | 2.65 |    | 19 |
| 6.66 | 19    | 13.4 | 2.22 | 2.85 | 45 | 24 |
| 7.28 | 32    | 2.6  | 0.89 | 1.3  | 27 | 13 |
| 7.16 | 29    | 4.5  | 1.26 | 1.62 | 27 | 14 |
| 7.14 | 29    | 5.6  | 1.17 | 1.64 | 27 | 13 |
| 6.99 | 28    | 8.6  | 1.41 | 2.18 | 25 | 14 |
| 6.88 | 27    | 11.3 | 1.59 | 2.65 | 22 | 14 |
| 6.81 | 26    | 13.8 | 1.64 | 2.25 | 25 | 15 |
| 6.76 | 26    | 15.8 | 2.07 | 2.89 | 22 | 16 |
| 6.67 | 25    | 18.1 | 1.63 | 2.53 | 25 | 14 |
| 6.58 | 25    | 20.6 | 1.82 | 3.03 | 22 | 13 |
| 6.47 | 22    | 23.9 | 1.84 | 2.65 | 24 | 12 |
| 6.44 | 17    | 25.2 | 1.78 | 2.35 | 34 | 15 |
| 6.38 | 12    | 26.4 |      |      |    |    |
| 6.90 | 10.83 | 27   | 2.7  | 2.15 |    | 17 |
| 6.76 | 14.7  | 25   | 2.34 | 2.53 |    | 15 |
| 6.62 | 18.25 | 21   | 2.44 | 1.99 |    | 17 |
| 6.43 | 27.1  | 14   | 1.81 | 1.5  |    | 21 |
| 6.47 | 25.52 | 20   | 2.22 | 1.81 |    | 20 |
| 6.48 | 26.31 | 17   | 2.25 | 1.77 |    | 22 |
| 6.51 | 22.31 | 17   | 1.84 | 1.83 |    | 18 |
| 6.37 | 22.74 | 2    |      |      |    |    |
| 6.84 | 10.7  | 42   | 2.63 | 3.31 |    | 17 |
| 6.94 | 10.08 | 32   | 2.62 | 3.28 |    | 15 |
| 6.92 | 10.64 | 33   | 2.4  | 2.36 |    | 18 |
| 6.98 | 8.96  | 31   | 2.86 | 3.69 |    | 22 |
| 6.83 | 11.84 | 23   | 2.19 | 2.43 |    | 16 |
| 6.78 | 10.99 | 24   | 2.15 | 2.38 |    | 19 |
| 6.81 | 11.2  | 19   | 1.64 | 2.33 |    | 18 |
| 6.92 | 7.6   | 25   | 2.61 | 1.95 |    | 16 |
| 6.67 | 17.64 | 30   | 2.94 | 2.11 |    | 15 |
| 6.70 | 13.62 | 30   | 2.73 | 2.65 |    | 18 |
| 6.53 | 21.63 | 28   | 2.64 | 2.25 |    | 14 |
| 6.44 | 24.31 | 25   | 2.83 | 2.86 |    | 17 |
| 6.44 | 25.38 | 25   | 4.26 | 3.08 |    | 23 |
| 6.37 | 25.6  | 24   | 3.39 | 2.52 |    | 20 |
| 6.86 | 7.71  | 32   | 3    | 3.55 |    | 30 |
| 7.02 | 7.67  | 25   | 1.95 | 2.56 |    | 8  |
| 7.01 | 16.99 | 28   | 2.02 | 2.46 |    | 19 |
| 6.49 | 25.87 | 22   | 1.68 | 2.13 |    | 13 |
| 6.37 | 26.41 | 22   | 1.83 | 2.07 |    | 15 |
| 6.37 | 26.67 | 20   | 1.75 | 2.21 |    | 16 |
| 6.37 | 26.14 | 24   | 1.49 | 1.85 |    | 12 |
| 6.44 | 25.87 | 23   | 1.71 | 2.06 |    | 12 |
| 6.34 | 25.16 | 7    |      |      |    |    |
| 6.40 | 23.44 | 4    |      |      |    |    |
| 6.82 | 9.67  | 37   | 0.91 | 1.25 |    | 12 |
| 6.68 | 15.67 | 40   | 1.45 | 1.86 |    | 11 |
| 6.63 | 21.77 | 37   | 1.6  | 2.11 |    | 11 |
| 6.63 | 24.67 | 38   | 1.89 | 2.46 |    | 10 |
| 6.63 | 25.6  | 30   | 1.77 | 2.34 |    | 10 |



|      |       |    |      |      |    |      |
|------|-------|----|------|------|----|------|
| 6.39 | 25.8  | 25 | 1.78 | 2.38 |    | 10   |
| 6.37 | 24.67 | 23 | 1.64 | 2.16 |    | 11   |
| 6.37 | 30    | 5  | 1.64 | 2.15 |    | 15   |
| 6.96 | 8.13  | 26 | 2.13 | 3.66 |    | 14   |
| 6.94 | 9.77  | 24 | 2.22 | 3.81 |    | 12.2 |
| 6.88 | 10.95 | 23 | 2.64 | 4.54 |    | 14.8 |
| 6.80 | 12.04 | 20 | 2.25 | 3.87 |    | 12.8 |
| 6.68 | 15.4  | 17 | 2.26 | 3.88 |    | 13.6 |
| 6.61 | 18.1  | 16 | 2.87 | 4.93 |    | 17.5 |
| 6.51 | 21.46 | 15 | 2.87 | 4.93 |    | 18   |
| 6.39 | 25.23 | 14 | 2.26 | 3.88 |    | 17.1 |
| 6.34 | 26.66 | 10 | 1.49 | 2.56 |    | 13.1 |
| 6.34 | 27.46 | 11 | 1.19 | 2.04 |    | 15.9 |
|      |       |    |      |      |    |      |
| 6.98 | 7.6   | 51 | 2.36 | 3.55 |    | 11.8 |
| 6.85 | 12.3  | 25 | 1.39 | 2.09 |    | 11.2 |
| 6.81 | 12.7  | 22 | 1.72 | 2.58 |    | 11.8 |
| 6.74 | 13.8  | 23 | 1.5  | 2.25 |    | 13.5 |
| 6.72 | 15.5  | 15 |      |      |    |      |
| 6.70 | 17.1  | 10 |      |      |    |      |
|      |       |    |      |      |    |      |
| 7.02 | 8.23  | 30 | 1.47 | 1.93 | 22 | 16.4 |
| 7.00 | 9.36  | 30 | 1.82 | 2.39 | 26 | 19.2 |
| 6.80 | 12.85 | 28 | 1.72 | 2.25 | 28 | 17.1 |
| 6.84 | 14.04 | 26 | 1.77 | 2.32 | 30 | 17.1 |
| 6.81 | 14.61 | 25 | 1.81 | 2.37 | 28 | 17.2 |
| 6.71 | 17.91 | 24 | 1.76 | 2.31 |    | 17.2 |
| 6.68 | 19.28 | 22 | 2.03 | 2.66 | 28 | 18.4 |
| 6.63 | 19.97 | 24 | 1.87 | 2.45 | 28 | 18.4 |
| 6.58 | 21.62 | 22 | 1.97 | 2.58 | 37 | 20.8 |
| 6.49 | 21.94 | 24 | 1.81 | 2.37 | 30 | 25   |
| 6.53 | 22.62 | 21 | 2.05 | 2.69 | 30 | 19.2 |
| 6.49 | 23.6  | 19 | 1.93 | 2.53 | 29 | 16.8 |
|      |       | 34 | 0.36 | 0.49 | 24 | 3.7  |
|      |       | 40 | 0.85 | 1.17 | 28 | 9.4  |
|      |       | 33 | 0.57 | 0.78 | 28 | 6.1  |
|      |       | 31 | 0.74 | 1.02 | 29 | 8.1  |
|      |       | 30 | 1.14 | 1.57 | 27 | 11   |
|      |       | 30 | 2.14 | 2.95 | 31 | 19.6 |
|      |       | 34 | 2.48 | 3.42 | 28 | 20.6 |
|      |       | 30 | 2.43 | 3.37 | 31 | 19.1 |
|      |       | 20 | 0.45 | 0.62 | 30 | 9.4  |
|      |       | 32 | 2.92 | 4.03 | 28 | 33.1 |
|      |       | 19 |      |      |    |      |
|      |       | 22 | 0.36 | 0.49 | 29 | 7.7  |
|      |       | 34 | 0.97 | 1.22 | 24 | 8.1  |
|      |       | 36 | 1.28 | 1.61 | 23 | 9.8  |
|      |       | 38 | 1.36 | 1.71 | 22 | 8.8  |
|      |       | 36 | 1.51 | 1.9  | 27 | 9.3  |
|      |       | 36 | 1.37 | 1.73 | 29 | 8.6  |
|      |       | 35 | 1.37 | 1.73 | 30 | 8.7  |
|      |       | 28 | 1.4  | 1.76 | 25 | 9.2  |

|      |      |       |      |      |    |      |
|------|------|-------|------|------|----|------|
|      |      | 24    | 1.37 | 1.73 | 29 | 8.5  |
|      |      | 26    | 1.28 | 1.61 | 26 | 8.7  |
|      |      | 18    | 0.94 | 1.18 | 26 | 9.2  |
|      |      | 16    | 0.3  | 0.37 | 24 | 4.2  |
| 7.29 | 38   | -0.46 | 1.61 | 1.37 | 31 | 11.9 |
| 7.23 | 38   | -0.2  | 2.1  | 1.78 | 27 | 15.3 |
| 7.23 | 36   | -0.63 | 1.45 | 1.23 | 31 | 11.3 |
| 7.23 | 36   | -0.86 | 1.31 | 1.11 | 25 | 12.6 |
| 7.20 | 28   | 0.56  | 1.39 | 1.18 | 24 | 19.8 |
| 7.21 | 35   | -0.6  | 1.24 | 1.05 | 30 | 12.8 |
| 7.21 | 43   | 1.74  | 2.35 | 4.27 | 31 | 21.3 |
| 7.20 | 45   | 0.88  | 1.57 | 2.85 | 26 | 12   |
| 7.17 | 44   | 1.49  | 1.3  | 2.36 | 25 | 10.6 |
| 7.15 | 43   | 2.08  | 1.23 | 2.23 | 28 | 10.3 |
| 7.11 | 45   | 2.18  | 1.2  | 2.18 | 27 | 10.1 |
| 7.12 | 49   | 2     | 1.4  | 2.54 | 28 | 13.2 |
| 7.24 | 62   | -1.6  | 2.38 | 3    | 31 | 17.8 |
| 7.21 | 68   | -2.24 | 1.94 | 2.69 | 27 | 16.8 |
| 7.13 | 72   | -0.4  | 1.39 | 2.26 | 27 | 13.2 |
| 7.13 | 71   | -2.02 | 2.01 | 2.17 | 27 | 14.2 |
| 7.09 | 84   | -2.72 | 2.45 | 2.16 | 27 | 16.5 |
| 7.09 | 83   | -1.54 | 1.85 | 2.15 | 31 | 14.2 |
| 7.19 | 46   | 0.71  | 1.67 | 2.46 | 22 | 20   |
| 7.23 | 39   | 1.48  | 2.27 | 3.27 | 25 | 23   |
| 7.19 | 47   | 0.52  | 1.89 | 2.62 | 23 | 20   |
| 7.25 | 42   | 0.28  | 2.09 | 2.85 | 25 | 24   |
| 7.19 | 45   | 1.54  | 1.82 | 2.57 | 23 | 19   |
| 7.21 | 45   | 0.54  | 1.79 | 2.59 | 24 | 20   |
| 7.12 | 31   |       | 2.36 | 3.43 | 27 | 15   |
| 6.84 | 34   | 11.59 | 2.24 | 2.88 | 29 | 12   |
| 6.79 | 32   | 11.63 | 2.35 | 3.28 | 31 | 16   |
| 6.96 | 31   | 7.17  | 2.73 | 3.88 | 24 | 13   |
| 6.75 | 26   | 14.3  | 1.9  | 2.78 | 33 | 14   |
| 6.89 | 26   | 9.52  | 2.28 | 3.11 |    | 15   |
| 6.71 | 20   | 15.78 | 1.38 | 2.91 |    | 13   |
| 6.73 | 19   | 16.15 | 1.69 | 2.33 | 33 | 13   |
| 7.16 | 5.12 | 32    | 2.43 | 3.14 | 23 | 16.4 |
| 7.15 | 4.86 | 33    | 2.54 | 3.28 | 23 | 15.9 |
| 7.18 | 3.99 | 32    | 2.45 | 3.16 | 30 | 22   |
| 7.12 | 5.06 | 32    | 2.65 | 3.42 | 20 | 22.3 |
| 7.19 | 3.09 | 32    | 2.94 | 3.8  | 29 | 21.8 |
| 7.23 | 3.05 | 30    | 2.45 | 3.16 | 28 | 20   |
| 7.19 | 3.8  | 31    | 2.8  | 3.62 | 31 | 21.5 |
| 7.17 | 3.64 | 32    | 2.64 | 3.41 | 29 | 19.6 |
| 7.15 | 3.34 | 32    | 3.78 | 4.94 | 29 | 24.2 |
| 7.14 | 3.39 | 34    | 4.34 | 5.61 | 28 | 27.6 |
| 7.12 | 3.44 | 35    | 4.43 | 5.73 | 34 | 29.4 |
| 7.04 | 4.5  | 37    | 4.26 | 5.51 | 31 | 28.9 |
| 7.02 | 7.4  | 29    | 1.1  | 1.57 | 30 | 10.9 |
| 6.99 | 7.28 | 31    | 1.81 | 2.59 | 30 | 13   |

|      |       |    |      |      |    |      |
|------|-------|----|------|------|----|------|
| 6.94 | 7.28  | 29 | 1.86 | 2.66 | 28 | 13.5 |
| 6.94 | 6.82  | 23 | 1.8  | 2.57 | 35 | 13.5 |
| 6.95 | 6.07  | 22 | 1.76 | 2.51 | 30 | 14.6 |
| 6.95 | 5.54  | 18 | 1.42 | 2.03 | 22 | 14.7 |
| 6.96 | 5.14  | 17 | 1.28 | 1.83 |    | 13   |
| 7.01 | 4.16  | 16 | 1.23 | 1.76 |    | 14.9 |
| 6.97 | 4.15  | 15 |      |      |    |      |
| 7.03 | 3.58  | 13 |      |      |    |      |
| 7.03 | 3.5   | 13 |      |      |    |      |
| 7.04 | 3.6   | 12 |      |      |    |      |
| 7.14 | 5.54  | 30 | 1.41 | 2.08 | 21 | 19.9 |
| 7.12 | 5.35  | 30 | 1.4  | 2.07 | 15 | 20.1 |
| 7.10 | 5.11  | 29 | 1.5  | 2.21 | 17 | 22   |
| 7.13 | 4.54  | 29 | 1.54 | 2.27 | 14 | 22.9 |
| 7.16 | 3.86  | 29 | 1.49 | 2.2  | 19 | 22.4 |
| 7.19 | 3.21  | 28 | 1.5  | 2.21 | 16 | 23.5 |
| 7.20 | 2.77  | 28 | 1.38 | 2.04 | 17 | 22.5 |
| 7.14 | 3.3   | 28 | 1.32 | 1.95 | 16 | 22.3 |
| 7.17 | 2.8   | 29 | 1.45 | 2.14 | 22 | 21.1 |
| 7.18 | 3.1   | 26 | 1.39 | 2.05 | 16 | 24.5 |
| 7.19 | 2.89  | 23 | 1.26 | 1.86 | 21 | 23   |
| 7.11 | 5.03  | 26 | 0.93 | 1.37 | 20 | 13.6 |
| 7.17 | 3.96  | 25 | 0.79 | 1.16 | 22 | 13.1 |
| 7.20 | 3.46  | 24 | 0.85 | 1.25 | 25 | 15.5 |
| 7.23 | 2.8   | 23 | 0.92 | 1.36 | 26 | 17.2 |
| 7.20 | 3.1   | 21 | 0.82 | 1.21 | 22 | 16.2 |
| 7.15 | 4.12  | 21 | 0.81 | 1.19 | 20 | 16.3 |
| 7.01 | 6.85  | 20 | 0.84 | 1.24 |    | 16.7 |
| 6.92 | 7.76  | 19 |      |      |    |      |
| 6.94 | 7.76  | 19 |      |      |    |      |
| 6.90 | 7.74  | 17 |      |      |    |      |
| 6.93 | 7.26  | 16 |      |      |    |      |
| 6.83 | 12.9  | 25 | 0.62 | 0.77 | 30 | 12.4 |
| 6.81 | 14.63 | 29 | 1.5  | 1.88 | 31 | 17.1 |
| 6.80 | 15.76 | 27 | 1.35 | 1.69 | 22 | 16.2 |
| 6.71 | 17.12 | 26 | 1.37 | 1.72 | 23 | 16   |
| 6.75 | 13.1  | 34 | 2.24 | 2.81 | 26 | 18.9 |
| 6.72 | 14.5  | 32 | 1.64 | 2.06 | 28 | 15.2 |
| 6.84 | 11.47 | 32 | 2.36 | 2.96 | 26 | 20   |
| 6.72 | 15.96 | 26 | 1.43 | 1.79 | 29 | 16.6 |
| 6.86 |       | 50 | 2.14 | 2.52 | 21 | 12.8 |
| 6.79 |       | 40 | 1.99 | 2.35 | 23 | 13.9 |
| 6.78 |       | 37 | 1.89 | 2.23 | 21 | 13.9 |
| 6.76 |       | 24 | 1.59 | 1.87 | 29 | 14.5 |
| 6.89 |       | 50 | 2.41 | 2.84 | 20 | 14.6 |
| 7.00 | 10.94 | 41 | 2.13 | 2.51 | 18 | 13.7 |
| 7.13 | 7.17  | 38 | 2.38 | 2.81 | 18 | 15.2 |
| 7.13 | 4.17  | 37 | 2.04 | 2.46 |    | 30   |
| 7.12 | 1.68  | 40 | 2.66 | 2.97 | 32 | 18.6 |
| 7.08 | 4.68  | 31 | 2.87 | 3.2  | 29 | 23.6 |
| 7.17 | 1.37  | 39 | 2.15 | 2.4  | 33 | 15.8 |

|      |       |    |      |      |    |      |
|------|-------|----|------|------|----|------|
| 7.13 | 2.08  | 39 | 2.6  | 2.9  |    | 18.5 |
| 7.17 | 1.74  | 37 | 2.61 | 2.91 | 24 | 19   |
| 7.13 | 3.62  | 31 | 1.77 | 1.97 | 27 | 21.7 |
| 7.09 | 3.55  | 26 | 2.18 | 2.43 | 25 | 13.7 |
| 7.02 | 4.2   | 34 | 1.9  | 2.12 | 23 | 19.9 |
| 6.84 | 8.09  | 35 | 2.03 | 2.26 | 35 | 16.3 |
|      | 10    | 36 | 2.15 | 2.4  | 35 | 14.4 |
| 6.81 | 13.18 | 36 | 2.07 | 2.31 | 29 | 16.8 |
| 6.82 | 13.41 | 36 | 1.97 | 2.2  | 33 | 16.6 |
| 6.72 | 15.34 | 34 | 2.07 | 2.31 | 26 | 18.9 |
| 6.82 | 14.86 | 31 | 1.75 | 1.95 | 27 | 18.1 |
| 6.82 | 14.5  | 30 | 1.69 | 1.77 |    |      |
| 6.82 | 13.86 | 30 | 1.76 | 1.81 |    |      |
| 7.06 | 8.2   | 24 | 1.76 | 1.99 | 27 | 17.3 |
| 6.93 | 9.31  | 24 | 1.99 | 2.25 | 28 | 11.3 |
| 6.91 | 9.74  | 28 | 3.16 | 3.57 | 34 | 20.2 |
| 6.81 | 10.6  | 27 | 3.18 | 3.6  | 28 | 20.6 |
| 6.87 | 9.86  | 31 | 2.61 | 2.95 | 33 | 17.3 |
| 6.78 | 11.57 | 31 | 2.12 | 2.4  | 34 | 13.8 |
| 6.79 | 11.76 | 31 | 3.27 | 3.7  | 33 | 24.1 |
| 6.81 | 11.73 | 28 | 2.38 | 2.69 | 34 | 17.9 |

pH (gastric tonometry)    EtCO<sub>2</sub>(mmHg)    PCO<sub>2</sub>(gap)    PCCO    PCCI(l/min/m<sup>2</sup>)    PPV(%)    SV

| SVI(ml/m2) | SVV(%) | FIO2(%) | Peak Pulm Press(cmH2O) | Mean Pulm Press(cmH2O) |
|------------|--------|---------|------------------------|------------------------|
| 52.6       | 7      | 90      | 24                     | 6                      |
| 48.6       | 10     | 90      | 23                     | 6                      |
| 50.7       |        | 91      | 25                     | 6                      |
| 51.8       | 18     | 95      | 24                     | 6                      |
| 46.2       | 18     | 95      | 21                     | 5                      |
| 53.3       | 16     | 95      | 21                     | 5                      |
| 48.1       | 12     | 95      | 21                     | 5                      |
| 48.9       | 25     | 91      | 22                     | 6                      |
| 49.6       | 27     | 91      | 21                     | 6                      |
| 47.7       | 23     | 91      | 20                     | 5                      |
| 49         | 20     | 91      | 20                     | 6                      |
| 47.4       | 19     | 91      | 20                     | 5                      |
| 48.3       | 21     | 91      | 21                     | 6                      |
| 43.3       | 14     | 91      | 21                     | 5                      |
| 39         | 20     | 90      | 22                     | 5                      |
| 35         | 12     | 90      | 22                     | 5                      |
| 41         | 13     | 91      | 20                     | 5                      |
| 42         | 11     | 91      | 19                     | 5                      |
|            | 20     | 91      | 18                     | 5                      |
| 38.9       | 10     | 91      | 17                     | 5                      |
| 39         | 20     | 91      | 18                     | 5                      |
| 35.2       | 21     | 92      | 19                     | 5                      |
| 33.9       | 22     | 91      | 19                     | 5                      |
| 34.7       | 21     | 91      | 19                     | 5                      |
| 35.3       | 21     | 91      | 17                     | 5                      |
| 38.4       | 21     | 91      | 16                     | 4                      |
| 38.2       | 22     | 91      | 16                     | 4                      |
| 38.3       | 22     | 91      | 16                     | 4                      |
| 34.2       | 12     | 91      | 18                     | 5                      |
| 37.6       | 24     | 91      | 18                     | 5                      |
| 33.6       | 14     | 91      | 18                     | 5                      |
| 33.4       | 19     | 91      | 17                     | 5                      |
| 31.5       | 17     | 91      | 18                     | 5                      |
| 34.8       | 21     | 91      | 18                     | 5                      |
| 33.8       | 17     | 91      | 18                     | 5                      |
| 20.2       | 19     | 83      | 29                     | 7                      |
|            | 21     | 83      | 29                     | 7                      |
| 18         | 24     | 83      | 29                     | 7                      |
| 24         | 22     | 83      | 29                     | 8                      |
| 20         | 25     | 82      | 29                     | 8                      |
| 24         | 17     | 83      | 29                     | 8                      |
| 21         | 19     | 82      | 29                     | 8                      |
| 10         | 21     | 83      | 23                     | 5                      |
| 12         | 22     | 84      | 23                     | 6                      |
| 21         | 25     | 83      | 24                     | 6                      |
| 20         | 26     | 83      | 24                     | 6                      |
| 19         | 28     | 83      | 25                     | 6                      |
| 19         |        | 83      | 25                     | 6                      |
| 19         | 20     | 83      | 25                     | 6                      |
| 26         | 21     | 82      | 29                     | 6                      |
| 27         | 29     | 82      | 29                     | 6                      |

|    |    |    |    |   |
|----|----|----|----|---|
| 26 | 28 | 82 | 29 | 6 |
| 23 | 25 | 82 | 29 | 6 |
| 23 |    | 82 | 29 | 6 |
| 24 | 22 | 82 | 29 | 6 |
| 22 | 28 | 82 | 29 | 6 |
| 22 | 27 | 83 | 27 | 6 |
| 18 | 37 | 82 | 29 | 6 |
| 17 | 36 | 82 | 29 | 6 |
| 17 | 32 | 82 | 29 | 6 |
| 18 | 24 | 82 | 29 | 6 |
| 18 | 23 | 82 | 29 | 6 |
| 17 |    | 82 | 29 | 6 |
| 25 | 23 | 82 | 28 | 7 |
| 17 | 32 | 82 | 29 | 7 |
| 23 | 21 | 83 | 28 | 6 |
| 22 | 23 | 83 | 28 | 7 |
| 15 | 36 | 83 | 28 | 7 |
| 18 | 22 | 83 | 27 | 6 |
| 16 | 35 | 83 | 28 | 7 |
| 17 | 30 | 95 | 25 | 6 |
| 21 | 30 | 95 | 26 | 6 |
| 26 | 26 | 95 | 27 | 6 |
| 24 | 29 | 95 | 27 | 6 |
| 27 | 30 | 94 | 29 | 7 |
| 24 | 21 | 95 | 28 | 7 |
| 21 | 25 | 94 | 29 | 7 |
| 25 | 27 | 94 | 29 | 7 |
| 21 | 27 | 94 | 29 | 7 |
| 22 | 28 | 95 | 30 | 6 |
| 23 |    | 95 | 30 | 7 |
| 15 | 27 | 95 | 25 | 6 |
| 16 | 26 | 95 | 25 | 6 |
| 13 | 24 | 94 | 27 | 6 |
| 15 | 27 | 95 | 27 | 6 |
| 13 | 31 | 94 | 28 | 6 |
| 10 | 28 | 95 | 29 | 7 |
| 12 | 27 | 94 | 29 | 7 |
| 23 | 24 | 96 | 29 | 6 |
| 27 |    | 94 | 29 | 6 |
| 25 | 30 | 94 | 30 | 6 |
| 17 | 34 | 94 | 30 | 6 |
| 21 | 34 | 94 | 30 | 6 |
| 18 | 31 | 94 | 30 | 6 |
| 21 | 30 | 94 | 30 | 6 |
| 18 | 30 | 94 | 30 | 6 |
| 19 | 29 | 94 | 30 | 6 |
| 21 | 33 | 94 | 30 | 6 |
| 21 | 30 | 93 | 30 | 6 |
| 20 |    | 95 | 26 | 6 |
| 18 | 23 | 95 | 29 | 7 |
| 18 | 28 | 95 | 29 | 7 |

|    |    |    |    |   |
|----|----|----|----|---|
| 18 | 24 | 95 | 29 | 6 |
| 18 | 30 | 95 | 30 | 6 |
| 16 | 22 | 95 | 29 | 6 |
| 17 | 33 | 95 | 29 | 6 |
| 17 | 32 | 95 | 30 | 6 |
| 18 |    | 95 | 30 | 6 |
| 15 | 26 | 95 | 30 | 6 |
| 18 | 26 | 95 | 30 | 6 |
| 14 | 27 | 95 | 30 | 6 |
| 15 | 26 | 94 | 28 | 7 |
| 16 | 20 | 95 | 29 | 7 |
| 18 | 27 | 95 | 30 | 7 |
| 17 | 33 | 95 | 30 | 7 |
| 20 | 27 | 95 | 30 | 7 |
| 21 | 23 | 94 | 30 | 7 |
| 18 | 22 | 94 | 30 | 7 |
| 18 | 31 | 94 | 29 | 7 |
| 21 | 27 | 94 | 30 | 7 |
| 20 | 26 | 94 | 29 | 7 |
| 20 | 26 | 94 | 29 | 7 |
| 15 |    | 91 | 30 | 6 |
| 18 | 36 | 91 | 30 | 6 |
| 15 | 30 | 91 | 34 | 6 |
| 15 |    | 91 | 34 | 6 |
| 16 |    | 91 | 34 | 6 |
| 16 | 30 | 91 | 35 | 6 |
| 17 | 36 | 91 | 35 | 6 |
| 13 | 36 | 91 | 35 | 7 |
| 20 | 33 | 95 | 33 | 7 |
| 21 |    | 95 | 34 | 6 |
| 23 |    | 95 | 35 | 7 |
| 23 |    | 95 | 35 | 7 |
| 20 |    | 94 | 35 | 7 |
| 24 |    | 94 | 35 | 7 |
| 23 | 32 | 94 | 35 | 7 |
| 23 |    | 94 | 35 | 7 |
| 19 | 23 | 95 | 29 | 7 |
| 19 | 27 | 95 | 29 | 7 |
| 16 | 33 | 95 | 30 | 7 |
| 16 | 34 | 95 | 30 | 7 |
| 18 | 37 | 95 | 33 | 7 |
| 17 | 36 | 94 | 33 | 7 |
| 19 |    | 95 | 34 | 8 |
| 19 | 31 | 95 | 33 | 7 |
| 18 |    | 93 | 20 | 6 |
| 22 | 24 | 95 | 34 | 8 |
| 12 | 29 | 94 | 35 | 8 |
| 15 | 30 | 94 | 35 | 8 |
| 15 | 32 | 85 | 35 | 6 |
| 21 |    | 94 | 35 | 8 |
| 19 | 35 | 94 | 35 | 8 |
| 18 |    | 94 | 35 | 8 |

|    |    |    |    |   |
|----|----|----|----|---|
| 22 | 28 | 94 | 29 | 7 |
| 21 | 28 | 94 | 31 | 7 |
| 16 | 24 | 95 | 34 | 7 |
| 14 |    | 95 | 34 | 7 |
| 12 | 28 | 94 | 35 | 7 |
| 16 | 25 | 94 | 35 | 7 |
| 18 | 23 | 94 | 35 | 7 |
| 17 | 31 | 94 | 35 | 8 |
| 23 |    | 91 | 37 | 7 |
| 28 | 27 | 91 | 37 | 7 |
| 27 | 28 | 91 | 37 | 7 |
| 27 | 36 | 91 | 37 | 7 |
| 26 | 34 | 91 | 37 | 7 |
| 28 | 34 | 91 | 37 | 7 |
| 24 | 30 | 91 | 37 | 7 |
| 26 | 36 | 91 | 37 | 7 |
| 27 | 34 | 91 | 37 | 7 |
|    | 29 | 91 | 37 | 7 |
| 35 |    | 91 | 37 | 8 |
| 17 | 20 | 90 | 22 | 6 |
| 19 | 31 | 91 | 27 | 6 |
| 21 | 26 | 91 | 28 | 6 |
| 20 | 30 | 91 | 30 | 7 |
| 20 | 29 | 91 | 30 | 7 |
| 20 | 29 | 91 | 29 | 6 |
| 21 | 29 | 92 | 33 | 7 |
| 20 | 28 | 91 | 33 | 7 |
| 21 | 29 | 91 | 36 | 8 |
| 19 |    | 91 | 35 | 8 |
| 17 | 34 | 91 | 35 | 7 |
| 17 | 31 | 91 | 34 | 7 |
| 17 | 25 | 91 | 37 | 8 |
| 18 | 24 | 91 | 37 | 8 |
| 17 | 33 | 91 | 37 | 8 |
| 18 | 33 | 91 | 37 | 8 |
| 24 | 32 | 91 | 37 | 7 |
| 22 | 37 | 91 | 37 | 8 |
| 17 | 30 | 91 | 37 | 7 |
| 19 | 34 | 91 | 37 | 8 |
| 22 | 32 | 91 | 37 | 8 |
| 24 |    | 91 | 37 | 8 |
| 20 |    | 91 | 37 | 8 |
| 20 | 33 | 91 | 37 | 8 |
| 24 | 26 | 91 | 30 | 7 |
| 24 | 34 | 91 | 33 | 7 |
| 25 | 30 | 91 | 35 | 8 |
| 28 |    | 91 | 36 | 7 |
| 29 | 36 | 91 | 37 | 7 |
| 27 | 34 | 91 | 37 | 7 |
| 27 | 24 | 91 | 37 | 7 |
| 29 | 32 | 91 | 37 | 8 |
| 35 |    | 91 | 37 | 7 |



|    |    |    |    |    |
|----|----|----|----|----|
| 35 | 26 | 91 | 37 | 7  |
| 30 | 29 | 91 | 38 | 7  |
| 35 | 27 | 91 | 37 | 7  |
| 13 | 19 | 91 | 27 | 6  |
| 19 | 19 | 91 | 29 | 6  |
| 18 | 26 | 91 | 29 | 7  |
| 20 | 25 | 91 | 32 | 7  |
| 19 | 28 | 91 | 32 | 7  |
| 21 | 37 | 91 | 32 | 7  |
| 22 | 40 | 91 | 35 | 7  |
| 22 | 34 | 91 | 34 | 6  |
| 19 | 37 | 91 | 37 | 7  |
| 18 | 38 | 91 | 36 | 7  |
| 21 | 33 | 91 | 37 | 7  |
|    |    | 91 | 36 | 7  |
| 12 | 28 | 82 | 42 | 7  |
| 13 | 28 | 82 | 37 | 7  |
| 14 | 30 | 82 | 42 | 8  |
| 17 | 37 | 83 | 45 | 8  |
| 17 | 34 | 83 | 44 | 8  |
| 18 | 32 | 83 | 45 | 8  |
| 14 | 27 | 83 | 40 | 7  |
|    |    |    | 16 | 4  |
| 21 | 30 | 82 | 31 | 6  |
| 24 | 28 | 82 | 32 | 6  |
| 18 | 22 | 82 | 31 | 6  |
| 24 |    | 82 | 29 | 6  |
| 24 | 25 | 82 | 33 | 6  |
| 22 | 26 | 82 | 35 | 7  |
| 22 | 29 | 82 | 33 | 7  |
| 13 | 30 | 82 | 39 | 8  |
| 12 | 33 | 82 | 44 | 8  |
| 17 | 39 | 82 | 42 | 8  |
| 13 |    | 82 | 44 | 8  |
| 16 |    | 82 | 46 | 9  |
| 17 |    | 82 | 43 | 8  |
| 16 |    | 82 | 45 | 9  |
| 35 | 28 | 82 | 12 | 4  |
| 16 | 31 | 82 | 33 | 8  |
| 25 | 22 | 82 | 35 | 8  |
| 18 | 26 | 82 | 37 | 8  |
| 17 | 26 | 82 | 37 | 8  |
| 20 | 33 | 82 | 39 | 9  |
| 16 |    | 82 | 42 | 9  |
| 16 |    | 82 | 41 | 9  |
|    |    | 81 | 19 |    |
|    |    | 82 | 16 |    |
| 14 | 27 | 82 | 50 | 9  |
| 14 | 29 | 82 | 50 | 9  |
| 15 | 28 | 82 | 50 | 10 |
| 14 | 28 | 82 | 50 | 9  |
| 13 | 31 | 83 | 59 | 10 |

|      |    |    |    |    |
|------|----|----|----|----|
| 15   | 28 | 83 | 55 | 10 |
| 14   | 30 | 83 | 57 | 10 |
| 15   | 28 | 82 | 23 |    |
| 24   | 32 | 82 | 50 | 10 |
| 21   | 32 | 82 | 49 | 10 |
| 25.4 | 35 | 82 | 53 | 11 |
| 21.9 | 30 | 83 | 54 | 11 |
| 23.3 |    | 83 | 56 | 11 |
| 30   | 27 | 83 | 55 | 11 |
| 31   | 35 | 82 | 57 | 11 |
| 29.4 | 34 | 82 | 56 | 11 |
| 22.5 | 32 | 81 | 58 | 11 |
| 27.4 | 33 | 80 | 59 | 11 |
| 17.7 | 27 | 82 | 47 | 8  |
| 16.8 | 37 | 83 | 52 | 9  |
| 17.8 | 32 | 83 | 53 | 9  |
| 20.2 | 29 | 83 | 51 | 9  |
|      | 30 | 83 | 52 | 9  |
|      | 29 | 83 | 56 | 10 |
| 21.6 | 25 | 83 | 39 | 7  |
| 25.2 | 25 | 82 | 39 | 7  |
| 22.5 | 32 | 83 | 42 | 8  |
| 22.5 | 30 | 83 | 42 | 8  |
| 22.6 | 33 | 83 | 44 | 8  |
| 22.5 | 31 | 83 | 42 | 8  |
| 24.2 | 32 | 83 | 45 | 8  |
| 24.1 | 32 | 83 | 46 | 9  |
| 27.3 | 30 | 83 | 47 | 9  |
| 32.9 |    | 83 | 18 |    |
| 25.2 | 33 | 83 | 50 | 9  |
| 22   | 34 | 83 | 49 | 9  |
| 5.2  | 25 | 83 | 38 | 7  |
| 13   | 27 | 83 | 39 | 7  |
| 8.4  | 24 | 83 | 37 | 8  |
| 11.2 | 23 | 82 | 41 | 8  |
| 15.1 | 24 | 83 | 41 | 8  |
| 27.1 | 25 | 82 | 42 | 8  |
| 28.5 | 25 | 82 | 42 | 8  |
| 26.4 | 26 | 82 | 43 | 8  |
|      | 27 | 83 | 45 | 9  |
|      | 35 | 82 | 45 | 9  |
|      | 30 | 83 | 16 |    |
| 16.6 | 30 | 83 | 45 | 9  |
| 10.3 |    | 82 | 36 | 8  |
| 11.7 |    | 82 | 36 | 8  |
| 11.1 | 31 | 82 | 38 | 8  |
| 11.8 |    | 82 | 43 | 9  |
| 10.8 |    | 82 | 44 | 10 |
| 11   |    | 82 | 45 | 10 |
| 11.6 | 21 | 83 | 47 | 10 |

|      |    |    |    |    |
|------|----|----|----|----|
| 10.7 | 34 | 83 | 47 | 10 |
| 11   | 37 | 83 | 50 | 10 |
| 11.6 |    | 83 | 48 | 11 |
| 5.3  |    | 83 | 49 | 10 |
| 10.1 | 20 | 84 | 20 | 6  |
| 13   | 27 | 84 | 20 | 6  |
| 9.6  | 26 | 84 | 20 | 6  |
| 10.7 | 22 | 84 | 20 | 6  |
| 16.9 | 22 | 84 | 20 | 6  |
| 10.9 | 21 | 84 | 20 | 6  |
| 38.8 | 28 | 84 | 19 | 5  |
| 21.9 | 26 | 84 | 20 | 5  |
| 19.2 | 25 | 84 | 19 | 5  |
| 18.8 | 32 | 83 | 19 | 5  |
| 18.4 | 33 | 83 | 19 | 5  |
| 24   | 30 | 83 | 20 | 5  |
| 25.2 | 24 | 83 | 19 | 6  |
| 22.4 | 25 | 84 | 19 | 6  |
| 19.2 | 31 | 83 | 20 | 6  |
| 19.8 | 33 | 83 | 20 | 6  |
| 22.9 | 27 | 83 | 20 | 6  |
| 20.5 | 30 | 83 | 20 | 6  |
| 30   | 19 | 83 | 19 | 6  |
| 33   | 22 | 83 | 19 | 5  |
| 28   | 24 | 83 | 20 | 6  |
| 34   | 25 | 83 | 20 | 6  |
| 26   | 25 | 84 | 19 | 6  |
| 29   | 20 | 83 | 19 | 6  |
| 20   | 25 | 82 | 29 | 7  |
| 22   | 22 | 83 | 29 | 7  |
| 21   | 24 | 82 | 29 | 7  |
| 20   |    | 82 | 29 | 7  |
| 21   | 19 | 83 | 29 | 7  |
| 19   | 26 | 83 | 29 | 7  |
| 23   | 20 | 83 | 30 | 7  |
| 19   | 18 | 83 | 29 | 7  |
| 21.2 | 30 | 90 | 25 | 5  |
| 20.6 | 24 | 90 | 27 | 6  |
| 28.5 | 34 | 90 | 27 | 6  |
| 28.8 | 25 | 90 | 28 | 6  |
| 28.2 | 22 | 90 | 28 | 6  |
| 25.9 | 35 | 90 | 27 | 6  |
| 27.8 | 24 | 90 | 28 | 6  |
| 25.3 | 30 | 90 | 27 | 6  |
| 31.4 | 26 | 90 | 29 | 6  |
| 35.7 | 23 | 90 | 29 | 6  |
| 38   | 35 | 90 | 29 | 6  |
| 37.3 | 32 | 90 | 29 | 6  |
| 15.6 | 30 | 34 | 23 | 6  |
| 18.5 |    | 36 | 23 | 5  |

|      |    |    |    |   |
|------|----|----|----|---|
| 19.4 |    | 31 | 24 | 6 |
| 19.4 | 40 | 30 | 26 | 6 |
| 20.9 | 29 | 20 | 25 | 6 |
| 21.1 | 24 | 21 | 26 | 6 |
| 18.6 | 23 | 16 | 27 | 5 |
| 21.4 | 20 | 16 | 27 | 5 |
|      |    |    | 29 | 6 |
|      |    |    | 28 | 6 |
|      |    |    | 28 | 6 |
|      |    |    | 27 | 6 |
| 29.4 | 23 | 91 | 18 | 4 |
| 32.5 | 16 | 91 | 19 | 5 |
| 33.8 | 17 | 91 | 19 | 5 |
| 33.8 | 19 | 91 | 20 | 5 |
| 33.2 | 22 | 91 | 20 | 5 |
| 34.7 | 21 | 91 | 20 | 5 |
| 33.2 | 20 | 91 | 22 | 5 |
| 33   | 19 | 91 | 22 | 5 |
| 31.2 | 24 | 91 | 22 | 5 |
| 36.2 | 19 | 91 | 22 | 5 |
| 34   | 22 | 91 | 23 | 5 |
| 20.1 | 24 | 91 | 22 | 5 |
| 19.4 | 23 | 91 | 21 | 5 |
| 23   | 30 | 91 | 23 | 5 |
| 25.4 | 28 | 91 | 22 | 5 |
| 23.9 | 22 | 91 | 25 | 6 |
| 24.1 | 21 | 91 | 24 | 6 |
| 24.7 | 21 | 91 | 25 | 6 |
|      |    | 91 | 25 | 5 |
|      |    | 91 | 26 | 5 |
|      |    | 91 | 26 | 5 |
|      |    | 91 | 28 | 6 |
| 15.6 | 30 | 83 | 23 | 5 |
| 21.4 | 30 | 83 | 23 | 5 |
| 20.3 | 27 | 83 | 24 | 5 |
| 20.1 | 29 | 84 | 24 | 5 |
| 23.8 | 25 | 83 | 29 | 6 |
| 19.1 | 31 | 83 | 28 | 6 |
| 25.1 | 29 | 82 | 30 | 6 |
| 20.9 | 30 | 84 | 25 | 6 |
| 15.1 | 34 | 86 | 42 | 7 |
| 16.4 | 35 | 86 | 42 | 7 |
| 16.4 | 32 | 86 | 42 | 7 |
| 17.1 | 22 | 86 | 39 | 7 |
| 17.2 | 33 | 86 | 42 | 7 |
| 15.7 | 23 | 86 | 41 | 8 |
| 17.9 | 23 | 82 | 37 | 7 |
| 18.9 | 30 | 83 | 34 | 6 |
| 20.8 | 28 | 83 | 33 | 6 |
| 26.4 | 30 | 83 | 28 | 5 |
| 17.6 | 25 | 83 | 32 | 6 |

|      |    |    |    |   |
|------|----|----|----|---|
| 20.7 | 24 | 83 | 33 | 6 |
| 21.3 | 25 | 83 | 30 | 6 |
| 24.3 | 25 | 83 | 30 | 5 |
| 15.4 | 22 | 84 | 27 | 5 |
| 22.2 | 25 | 83 | 31 | 6 |
| 18.2 | 28 | 85 | 22 | 6 |
| 16.1 | 26 | 84 | 22 | 6 |
| 18.7 | 27 | 85 | 22 | 6 |
| 18.5 | 29 | 85 | 21 | 6 |
| 21.2 | 28 | 85 | 21 | 6 |
| 20.8 | 24 | 85 | 22 | 6 |
| 17   | 23 | 85 | 22 | 6 |
| 19   | 24 | 85 | 22 | 6 |
| 19.6 | 24 | 83 | 26 | 6 |
| 12.8 | 25 | 83 | 30 | 5 |
| 22.9 | 30 | 83 | 30 | 5 |
| 23.3 | 31 | 83 | 31 | 6 |
| 19.6 | 28 | 84 | 33 | 6 |
| 15.6 | 27 | 83 | 32 | 6 |
| 27.3 | 36 | 83 | 36 | 6 |
| 20.2 | 32 | 83 | 32 | 6 |

SVI(ml/m2)    SVV(%)    FIO2(%)    Peak Pulm Press(cmH2O)    Mean Pulm Press(cmH2O)

| Plateau Press(cmH2O) | PEEP(cmH2O) | Compliance(mlcmH2O) | Compliance static (mlcmH2O) |
|----------------------|-------------|---------------------|-----------------------------|
| 22                   | 2           | 22                  | 24.50                       |
| 21                   | 2           | 23                  | 25.26                       |
| 23                   | 2           | 25                  | 25.24                       |
| 22                   | 1           | 22                  | 21.43                       |
| 20                   | 2           | 21                  | 22.22                       |
| 19                   | 2           | 21                  | 22.94                       |
| 19                   | 2           | 23                  | 23.53                       |
| 22                   | 1           | 13                  | 11.90                       |
| 20                   | 2           | 13                  | 12.78                       |
| 19                   | 2           | 12                  | 12.94                       |
| 20                   | 2           | 12                  | 11.67                       |
| 19                   | 2           | 13                  | 12.35                       |
| 21                   | 2           | 12                  | 12.11                       |
| 20                   | 2           | 12                  | 12.22                       |
| 21                   | 2           | 18                  | 17.89                       |
| 21                   | 2           | 17                  | 17.89                       |
| 19                   | 2           | 18                  | 17.65                       |
| 18                   | 1           | 17                  | 16.47                       |
| 17                   | 2           | 18                  | 18.00                       |
| 16                   | 2           | 18                  | 18.57                       |
| 17                   | 2           | 18                  | 18.00                       |
| 18                   | 2           | 19                  | 18.13                       |
| 18                   | 2           | 16                  | 16.88                       |
| 17                   | 2           | 17                  | 18.67                       |
| 17                   | 2           | 17                  | 16.67                       |
| 15                   | 1           | 17                  | 17.14                       |
| 15                   | 1           | 17                  | 17.14                       |
| 16                   | 2           | 17                  | 17.86                       |
| 17                   | 2           | 20                  | 20.67                       |
| 18                   | 2           | 19                  | 18.13                       |
| 17                   | 2           | 19                  | 19.33                       |
| 16                   | 2           | 20                  | 20.71                       |
| 18                   | 2           | 18                  | 18.75                       |
| 17                   | 2           | 19                  | 20.00                       |
| 18                   | 2           | 19                  | 18.13                       |
| 28                   | 2           | 10                  | 10.00                       |
| 27                   | 2           | 11                  | 11.04                       |
| 27                   | 1           | 11                  | 10.38                       |
| 26                   | 2           | 11                  | 11.25                       |
| 26                   | 2           | 11                  | 10.83                       |
| 26                   | 1           | 10                  | 9.60                        |
| 26                   | 1           | 10                  | 9.20                        |
| 22                   | 1           | 10                  | 10.00                       |
| 23                   | 1           | 10                  | 9.09                        |
| 23                   | 2           | 10                  | 10.00                       |
| 24                   | 2           | 9.4                 | 9.55                        |
| 24                   | 1           | 9.3                 | 9.13                        |
| 25                   | 2           | 9.4                 | 9.13                        |
| 24                   | 2           | 10                  | 9.55                        |
| 29                   | 1           | 8.7                 | 8.21                        |
| 28                   | 2           | 8.8                 | 9.23                        |

|    |   |     |      |
|----|---|-----|------|
| 28 | 1 | 8.9 | 8.89 |
| 28 | 2 | 9   | 9.62 |
| 28 | 2 | 8.8 | 9.23 |
| 28 | 1 | 9.2 | 9.26 |
| 28 | 2 | 8.5 | 8.85 |
| 26 | 1 | 10  | 9.60 |
| 28 | 2 | 9.2 | 9.62 |
| 28 | 1 | 10  | 9.63 |
| 28 | 1 | 10  | 9.63 |
| 28 | 1 | 9.1 | 9.26 |
| 29 | 2 | 9.3 | 9.26 |
| 29 | 2 | 9.3 | 9.26 |
| 28 | 2 | 7.9 | 8.46 |
| 28 | 2 | 8.1 | 8.08 |
| 27 | 1 | 7.7 | 7.69 |
| 28 | 2 | 8   | 8.08 |
| 28 | 2 | 8.1 | 8.46 |
| 27 | 1 | 8   | 7.69 |
| 27 | 2 | 8.1 | 8.40 |
| 25 | 2 | 10  | 9.13 |
| 25 | 1 | 9   | 9.17 |
| 26 | 1 | 8.9 | 8.80 |
| 27 | 1 | 10  | 8.85 |
| 28 | 2 | 8.9 | 8.85 |
| 28 | 1 | 8.7 | 8.52 |
| 29 | 2 | 8.7 | 8.89 |
| 29 | 2 | 8.9 | 8.89 |
| 29 | 2 | 8.1 | 8.89 |
| 28 | 2 | 8   | 8.85 |
| 29 | 2 | 8.4 | 8.15 |
| 24 | 2 |     | 8.18 |
| 25 | 1 | 7.7 | 7.50 |
| 26 | 2 | 7.4 | 7.92 |
| 27 | 2 | 7.6 | 7.60 |
| 27 | 2 | 7.5 | 7.60 |
| 28 | 2 | 7.5 | 7.69 |
| 29 | 2 | 7.4 | 7.41 |
| 29 | 1 | 6.3 | 6.79 |
| 29 | 2 | 6.5 | 7.04 |
| 29 | 1 | 5.9 | 6.07 |
| 29 | 1 | 6.2 | 6.07 |
| 29 | 1 | 6.1 | 6.07 |
| 29 | 1 | 5.7 | 5.71 |
| 29 | 1 | 5.3 | 5.36 |
| 29 | 1 | 5.6 | 5.71 |
| 29 | 1 | 5.3 | 5.36 |
| 29 | 1 | 5.7 | 5.71 |
| 29 | 2 | 5.2 | 5.56 |
| 26 | 1 | 8.4 | 8.80 |
| 28 | 2 | 8.4 | 8.85 |
| 29 | 2 | 8.1 | 8.52 |

|    |   |     |       |
|----|---|-----|-------|
| 29 | 1 | 8.1 | 7.86  |
| 29 | 1 | 8.3 | 7.86  |
| 29 | 2 | 7.7 | 7.78  |
| 28 | 2 | 7.9 | 8.46  |
| 29 | 2 | 7.9 | 7.78  |
| 29 | 2 | 7.8 | 7.78  |
| 29 | 2 | 7.7 | 7.78  |
| 29 | 2 | 7.6 | 7.78  |
| 29 | 1 | 7.5 | 7.14  |
| 28 | 1 | 6.6 | 6.67  |
| 29 | 2 | 6.6 | 6.67  |
| 29 | 2 | 6.7 | 6.67  |
| 29 | 2 | 6.3 | 6.67  |
| 29 | 2 | 6.4 | 6.67  |
| 29 | 2 | 6.3 | 6.30  |
| 29 | 2 | 6.3 | 7.04  |
| 29 | 1 | 5.9 | 6.07  |
| 29 | 2 | 6.7 | 7.41  |
| 29 | 2 | 6.2 | 6.67  |
| 29 | 2 | 6.2 | 6.30  |
| 29 | 1 | 6.1 | 6.07  |
| 29 | 1 | 6.2 | 6.43  |
| 33 | 1 | 6.1 | 6.25  |
| 34 | 1 | 6.7 | 6.36  |
| 33 | 1 | 6.4 | 6.56  |
| 34 | 1 | 6.4 | 6.06  |
| 34 | 1 | 6.3 | 6.36  |
| 34 | 1 | 6.1 | 6.36  |
| 32 | 2 | 5.9 | 6.00  |
| 34 | 2 | 8.9 | 5.94  |
| 34 | 2 | 5.7 | 5.63  |
| 34 | 2 | 5.5 | 5.63  |
| 35 | 2 | 5.1 | 5.15  |
| 35 | 1 | 5.3 | 5.00  |
| 35 | 2 | 5.1 | 5.15  |
| 35 | 1 | 4.8 | 4.71  |
| 29 | 1 | 7   | 6.79  |
| 28 | 2 | 6.7 | 6.92  |
| 29 | 2 | 6.5 | 6.30  |
| 30 | 2 | 6.4 | 6.43  |
| 32 | 2 | 6   | 6.33  |
| 33 | 2 | 6.1 | 6.13  |
| 33 | 2 | 5.9 | 5.81  |
| 33 | 2 | 5.9 | 6.13  |
|    | 2 | 5.6 | 10.00 |
| 34 | 2 | 5.9 | 5.94  |
| 35 | 1 | 5.3 | 5.00  |
| 35 | 2 | 5.2 | 4.85  |
| 35 | 0 | 5.4 | 5.14  |
| 35 | 2 | 5   | 4.85  |
| 35 | 2 | 4.8 | 4.85  |
| 35 | 2 | 5   | 4.85  |



|    |   |     |      |
|----|---|-----|------|
| 29 | 1 | 6.6 | 6.43 |
| 31 | 1 | 6.3 | 6.33 |
| 34 | 2 | 6.1 | 5.94 |
| 33 | 2 | 6   | 6.45 |
| 35 | 2 | 5.8 | 5.76 |
| 35 | 2 | 5.6 | 5.76 |
| 34 | 2 | 5.8 | 5.94 |
| 34 | 1 | 5.8 | 5.45 |
| 37 | 1 | 6.3 | 6.11 |
| 37 | 2 | 6.3 | 6.57 |
| 37 | 1 | 5.7 | 5.56 |
| 37 | 1 | 5.4 | 5.28 |
| 37 | 2 | 5.5 | 5.43 |
| 37 | 2 | 5.5 | 5.43 |
| 37 | 2 | 5.2 | 5.14 |
| 37 | 2 | 4.9 | 5.43 |
| 37 | 2 | 5   | 5.14 |
| 37 | 1 | 5   | 4.72 |
| 37 | 2 | 5.2 | 4.86 |
| 22 | 1 | 7.8 | 8.57 |
| 27 | 2 | 7.1 | 7.60 |
| 27 | 1 | 7.1 | 7.31 |
| 30 | 1 | 6.9 | 6.55 |
| 30 | 2 | 6.5 | 6.79 |
| 30 | 2 | 6.9 | 7.14 |
| 32 | 1 | 6.5 | 6.45 |
| 33 | 2 | 6.7 | 6.77 |
| 35 | 1 | 6   | 5.88 |
| 35 | 1 | 6.3 | 6.18 |
| 35 | 2 | 6.3 | 6.06 |
| 34 | 2 | 6.3 | 6.56 |
| 36 | 1 | 6.9 | 6.86 |
| 37 | 2 | 6   | 6.29 |
| 37 | 1 | 5.6 | 5.56 |
| 35 | 2 | 6.1 | 6.67 |
| 37 | 2 | 5.5 | 5.71 |
| 37 | 1 | 5.7 | 5.56 |
| 37 | 2 | 5.5 | 5.43 |
| 36 | 2 | 5.4 | 5.29 |
| 37 | 2 | 5.2 | 5.14 |
| 37 | 2 | 5.2 | 5.14 |
| 37 | 2 | 5   | 7.43 |
| 35 | 1 | 5.6 | 5.88 |
| 30 | 1 | 6.7 | 6.55 |
| 33 | 2 | 6.4 | 6.13 |
| 34 | 2 | 6.5 | 6.25 |
| 35 | 1 | 6   | 6.18 |
| 37 | 1 | 5.9 | 5.56 |
| 37 | 2 | 5.6 | 6.00 |
| 37 | 2 | 5.5 | 6.00 |
| 37 | 2 | 5.6 | 5.71 |
| 37 | 2 | 5.8 | 5.71 |

|    |   |     |      |
|----|---|-----|------|
| 37 | 2 | 5.4 | 5.14 |
| 37 | 1 | 5.3 | 5.56 |
| 37 | 2 | 5.5 | 5.43 |
| 27 | 2 | 8   | 8.00 |
| 28 | 1 | 7.5 | 7.78 |
| 29 | 2 | 7.3 | 7.78 |
| 32 | 2 | 7.2 | 7.33 |
| 32 | 1 | 7.1 | 7.42 |
| 32 | 1 | 6.8 | 7.10 |
| 35 | 2 | 6.8 | 6.67 |
| 34 | 2 | 6.8 | 6.88 |
| 37 | 1 | 6.3 | 6.39 |
| 36 | 2 | 6.5 | 6.47 |
| 37 | 2 | 8   | 6.57 |
| 36 | 2 | 6.6 | 6.76 |
| 41 | 0 | 8.3 | 8.00 |
| 35 | 0 | 10  | 8.29 |
| 41 | 0 | 7.9 | 9.43 |
| 44 | 0 | 7.4 | 7.44 |
| 43 | 0 | 7.5 | 8.46 |
| 43 | 0 | 7.5 | 7.67 |
| 39 | 0 | 8.7 | 7.80 |
|    | 2 |     | 7.50 |
| 30 | 1 | 8.6 | 8.33 |
| 31 | 1 | 8.4 | 8.00 |
| 31 | 1 | 8.3 | 8.57 |
| 29 | 1 | 9   | 9.60 |
| 33 | 1 | 8.6 | 8.62 |
| 34 | 2 | 8.4 | 8.71 |
| 32 | 1 | 9.3 | 8.44 |
| 39 | 1 | 8.1 | 8.79 |
| 43 | 2 | 7.6 | 7.95 |
| 41 | 2 | 7.7 | 7.89 |
| 43 | 1 | 7.9 | 7.80 |
| 45 | 1 | 7.7 | 7.86 |
| 41 | 1 | 8.6 | 7.50 |
| 44 | 1 | 7.9 | 8.50 |
|    | 2 |     | 8.44 |
| 33 | 1 | 8   | 8.62 |
| 35 | 2 | 7.6 | 7.81 |
| 36 | 2 | 7.4 | 7.88 |
| 36 | 2 | 7.9 | 7.65 |
| 38 | 2 | 7.2 | 7.65 |
| 41 | 1 | 6.7 | 7.22 |
| 40 | 2 | 6.8 | 7.00 |
|    | 2 |     | 7.44 |
|    | 2 |     | 7.11 |
| 49 | 1 | 7   | 6.38 |
| 49 | 1 | 6.3 | 6.88 |
| 49 | 1 | 6.1 | 6.67 |
| 49 | 1 | 6.3 | 6.25 |
| 58 | 1 | 6.3 | 6.25 |

|    |   |     |      |
|----|---|-----|------|
| 54 | 1 | 7   | 6.32 |
| 56 | 1 | 6.6 | 7.36 |
|    | 2 |     | 6.73 |
| 49 | 1 | 5.4 | 5.63 |
| 49 | 0 | 5.2 | 5.42 |
| 53 | 0 | 5.2 | 5.31 |
| 53 | 0 | 5.1 | 5.09 |
| 55 | 0 | 5   | 5.09 |
| 55 | 0 | 4.9 | 4.91 |
| 57 | 0 | 4.7 | 4.91 |
| 55 | 0 | 4.8 | 4.56 |
| 57 | 0 | 4.5 | 4.91 |
| 58 | 0 | 4.5 | 4.56 |
|    |   |     | 4.66 |
| 47 | 1 | 6.3 | 5.85 |
| 51 | 1 | 6.1 | 6.52 |
| 52 | 1 | 6.1 | 6.00 |
| 51 | 1 | 6.3 | 6.08 |
| 51 | 1 | 6.4 | 6.20 |
| 55 | 1 | 5.9 | 6.40 |
|    |   |     | 5.93 |
| 38 | 1 | 7.2 | 8.13 |
| 39 | 1 | 7.4 | 7.30 |
| 41 | 2 | 6.9 | 7.11 |
| 42 | 1 | 7   | 7.18 |
| 43 | 1 | 6.9 | 6.83 |
| 41 | 1 | 7.2 | 6.90 |
| 45 | 1 | 6.9 | 7.00 |
| 45 | 2 | 6.6 | 6.82 |
| 47 | 1 | 6.2 | 6.74 |
|    | 2 |     | 5.83 |
| 49 | 1 | 6   | 6.09 |
| 49 | 1 | 5.7 | 5.83 |
| 37 | 1 | 6.1 | 6.56 |
| 38 | 1 | 7   | 6.11 |
| 37 | 1 | 6.5 | 6.76 |
| 41 | 1 | 6.1 | 6.67 |
| 40 | 1 | 6.1 | 6.00 |
| 42 | 1 | 6   | 6.15 |
| 41 | 1 | 6.3 | 5.85 |
| 43 | 1 | 6   | 6.25 |
| 44 | 2 | 5.9 | 5.95 |
| 44 | 1 | 5.9 | 5.95 |
|    | 2 |     | 6.05 |
| 45 | 2 | 5.9 | 5.81 |
| 35 | 1 | 6.2 | 5.76 |
| 36 | 0 | 6.3 | 6.47 |
| 38 | 1 | 6.2 | 6.11 |
| 43 | 1 | 6.5 | 5.95 |
| 44 | 1 | 6.5 | 6.43 |
| 45 | 1 | 6.3 | 6.51 |
| 47 | 1 | 6.2 | 6.36 |

|    |   |     |       |
|----|---|-----|-------|
| 47 | 1 | 6.1 | 6.09  |
| 50 | 1 | 5.9 | 6.09  |
| 48 | 1 | 6.1 | 5.71  |
| 49 | 1 | 6   | 5.96  |
|    |   |     | 6.04  |
| 17 | 1 | 5.4 | 5.25  |
| 17 | 1 | 5.3 | 5.31  |
| 17 | 1 | 5.2 | 5.31  |
| 17 | 1 | 5.4 | 5.19  |
| 17 | 1 | 5.5 | 5.44  |
| 17 | 1 | 5.4 | 5.31  |
|    |   |     |       |
| 19 | 2 | 7.4 | 7.06  |
| 19 | 2 | 6.9 | 7.06  |
| 18 | 2 | 7.5 | 7.50  |
| 18 | 2 | 7.4 | 8.13  |
| 18 | 2 | 7.7 | 8.13  |
| 18 | 2 | 6.9 | 6.88  |
| 18 | 2 | 6.6 | 6.25  |
| 18 | 2 | 6   | 6.13  |
| 18 | 2 | 6   | 5.88  |
| 18 | 2 | 6.2 | 5.81  |
| 18 | 2 | 5.8 | 5.75  |
| 18 | 2 | 5.8 | 5.69  |
| 18 | 2 | 8.2 | 8.13  |
| 18 | 2 | 8.5 | 8.75  |
| 18 | 2 | 8   | 8.13  |
| 18 | 2 | 7.8 | 7.50  |
| 18 | 2 | 7.7 | 7.50  |
| 18 | 2 | 7.8 | 8.13  |
| 29 | 2 | 8.4 | 8.52  |
| 29 | 1 | 7.2 | 7.14  |
| 29 | 1 | 7.3 | 7.14  |
| 29 | 2 | 7.6 | 7.78  |
| 29 | 2 | 7.3 | 7.41  |
| 29 | 2 | 7.7 | 7.78  |
| 29 | 2 | 7.5 | 7.78  |
| 29 | 2 | 6.8 | 7.04  |
| 24 | 1 | 11  | 11.30 |
| 26 | 1 | 11  | 10.80 |
| 26 | 1 | 12  | 12.00 |
| 27 | 1 | 11  | 10.77 |
| 26 | 1 | 12  | 12.40 |
| 26 | 0 | 11  | 11.15 |
| 27 | 0 | 11  | 10.37 |
| 26 | 1 | 12  | 12.00 |
| 28 | 1 | 11  | 9.26  |
| 27 | 0 | 12  | 11.48 |
| 28 | 0 | 12  | 11.07 |
| 28 | 1 | 12  | 12.22 |
| 23 | 1 | 9   | 9.09  |
| 22 | 1 | 9.1 | 9.52  |

|    |   |     |       |
|----|---|-----|-------|
| 24 | 1 | 8.6 | 8.70  |
| 25 | 1 | 8.3 | 8.33  |
| 25 | 1 | 8.6 | 8.33  |
| 25 | 1 | 8.5 | 8.75  |
| 27 | 1 | 8.4 | 8.46  |
| 27 | 1 | 8.4 | 8.46  |
| 28 | 0 | 8.2 | 7.86  |
| 28 | 1 | 8.5 | 8.15  |
| 28 | 1 | 8.1 | 8.15  |
| 26 | 1 | 8.4 | 8.80  |
| 17 | 1 | 11  | 11.25 |
| 18 | 1 | 10  | 11.18 |
| 19 | 1 | 9.1 | 10.56 |
| 20 | 1 | 10  | 9.47  |
| 20 | 1 | 10  | 10.00 |
| 19 | 1 | 10  | 10.56 |
| 21 | 0 | 9.3 | 9.05  |
| 22 | 1 | 9.3 | 9.05  |
| 22 | 1 | 8.9 | 9.05  |
| 21 | 0 | 9   | 9.05  |
| 22 | 0 | 8.7 | 8.64  |
| 21 | 1 | 10  | 10.00 |
| 21 | 1 | 11  | 10.00 |
| 22 | 1 | 10  | 10.48 |
| 22 | 1 | 10  | 10.00 |
| 24 | 1 | 9.1 | 9.13  |
| 23 | 1 | 10  | 9.55  |
| 25 | 1 | 8.7 | 8.75  |
| 25 | 1 | 9.2 | 9.17  |
| 26 | 1 | 8.4 | 8.40  |
| 26 | 1 | 7.7 | 8.40  |
| 27 | 1 | 8   | 8.46  |
| 23 | 1 | 8.7 | 9.09  |
| 23 | 1 | 9.1 | 9.09  |
| 24 | 1 | 9   | 8.70  |
| 24 | 1 | 9.1 | 9.13  |
| 29 | 1 | 7.9 | 7.86  |
| 27 | 1 | 7.8 | 8.08  |
| 29 | 1 | 7.6 | 7.86  |
| 25 | 1 | 8.5 | 8.75  |
| 41 | 1 | 5.4 | 5.50  |
| 41 | 1 | 5.6 | 5.75  |
| 41 | 1 | 5.6 | 5.75  |
| 38 | 1 | 6.9 | 6.76  |
| 42 | 0 | 5.6 | 5.48  |
| 41 | 0 | 5.4 | 5.37  |
| 36 | 1 | 6.8 | 6.86  |
| 33 | 1 | 7.3 | 7.50  |
| 33 | 1 | 8.4 | 8.75  |
| 27 | 1 | 10  | 10.00 |
| 32 | 1 | 9   | 9.03  |

|    |   |     |       |
|----|---|-----|-------|
| 33 | 0 | 8.7 | 8.48  |
| 30 | 1 | 10  | 9.66  |
| 29 | 1 | 10  | 9.64  |
| 27 | 1 | 11  | 10.38 |
| 30 | 1 | 9.2 | 9.31  |
| 19 | 2 | 8.8 | 8.82  |
| 19 | 2 | 8.7 | 8.82  |
| 19 | 2 | 8.5 | 8.24  |
| 19 | 2 | 8.4 | 8.24  |
| 19 | 2 | 8.2 | 8.82  |
| 19 | 2 | 8.2 | 8.82  |
| 19 | 2 | 8.1 | 8.24  |
| 19 | 2 | 8.4 | 8.24  |
| 26 | 1 | 10  | 9.60  |
| 29 | 1 | 8.9 | 8.57  |
| 30 | 1 | 8.8 | 8.62  |
| 30 | 1 | 8.5 | 8.62  |
| 32 | 1 | 7.9 | 8.39  |
| 31 | 1 | 8.7 | 8.67  |
| 36 | 1 | 7.2 | 7.43  |
| 32 | 1 | 8.2 | 8.39  |

Plateau Press(cmH2O)   PEEP(cmH2O)   Compliance(mlcmH2O)   Compliance static (mlcmH2O)

| Compliance dynamic(mlcmH2O) | VT expiratory(ml) | Glomerular Filtration -TP |
|-----------------------------|-------------------|---------------------------|
| 22.27                       | 490               | 50                        |
| 22.86                       | 480               | 48                        |
| 23.04                       | 530               | 51                        |
| 19.57                       | 450               | 50                        |
| 21.05                       | 400               | 46                        |
| 20.53                       | 390               | 52                        |
| 21.05                       | 400               | 54                        |
| 11.90                       | 250               | 56                        |
| 12.11                       | 230               | 57                        |
| 12.22                       | 220               | 61                        |
| 11.67                       | 210               | 63                        |
| 11.67                       | 210               | 77                        |
| 12.11                       | 230               | 61                        |
| 11.58                       | 220               | 95                        |
| 17.00                       | 340               | 67                        |
| 17.00                       | 340               | 59                        |
| 16.67                       | 300               | 70                        |
| 15.56                       | 280               | 60                        |
| 16.88                       | 270               | 53                        |
| 17.33                       | 260               | 70                        |
| 16.88                       | 270               | 65                        |
| 17.06                       | 290               | 50                        |
| 15.88                       | 270               | 53                        |
| 16.47                       | 280               | 57                        |
| 16.67                       | 250               | 59                        |
| 16.00                       | 240               | 53                        |
| 16.00                       | 240               | 50                        |
| 17.86                       | 250               | 46                        |
| 19.38                       | 310               | 83                        |
| 18.13                       | 290               | 80                        |
| 18.13                       | 290               | 81                        |
| 19.33                       | 290               | 79                        |
| 18.75                       | 300               | 76                        |
| 18.75                       | 300               | 67                        |
| 18.13                       | 290               | 70                        |
| 9.63                        | 260               | 36                        |
| 10.22                       | 276               | 38                        |
| 9.64                        | 270               | 38                        |
| 10.00                       | 270               | 34                        |
| 9.63                        | 260               | 31                        |
| 8.57                        | 240               | 26                        |
| 8.21                        | 230               | 23                        |
| 9.55                        | 210               | 22                        |
| 9.09                        | 200               | 25                        |
| 9.55                        | 210               | 18                        |
| 9.55                        | 210               | 15                        |
| 8.75                        | 210               | 15                        |
| 9.13                        | 210               | 10                        |
| 9.13                        | 210               | 6                         |
| 8.21                        | 230               | 26                        |
| 8.89                        | 240               | 26                        |

|      |     |     |
|------|-----|-----|
| 8.57 | 240 | 26  |
| 9.26 | 250 | 20  |
| 8.89 | 240 | 14  |
| 8.93 | 250 | 14  |
| 8.52 | 230 | 14  |
| 9.23 | 240 | 12  |
| 9.26 | 250 | 12  |
| 9.29 | 260 | 16  |
| 9.29 | 260 | 6   |
| 8.93 | 250 | 1   |
| 9.26 | 250 | 0   |
| 9.26 | 250 | 6   |
| 8.46 | 220 | 10  |
| 7.78 | 210 | 10  |
| 7.41 | 200 | 20  |
| 8.08 | 210 | 30  |
| 8.46 | 220 | 13  |
| 7.69 | 200 | 24  |
| 8.08 | 210 | 18  |
| 9.13 | 210 | 4   |
| 8.80 | 220 | 5   |
| 8.46 | 220 | 4   |
| 8.85 | 230 | 2   |
| 8.52 | 230 | -1  |
| 8.52 | 230 | -3  |
| 8.89 | 240 | -7  |
| 8.89 | 240 | -4  |
| 8.89 | 240 | -10 |
| 8.21 | 230 | -12 |
| 7.86 | 220 | -13 |
| 7.83 | 180 | 3   |
| 7.50 | 180 | -1  |
| 7.60 | 190 | -3  |
| 7.60 | 190 | -4  |
| 7.31 | 190 | -3  |
| 7.41 | 200 | -9  |
| 7.41 | 200 | -11 |
| 6.79 | 190 | 4   |
| 7.04 | 190 | 8   |
| 5.86 | 170 | 12  |
| 5.86 | 170 | 4   |
| 5.86 | 170 | 1   |
| 5.52 | 160 | -3  |
| 5.17 | 150 | -7  |
| 5.52 | 160 | -5  |
| 5.17 | 150 | -5  |
| 5.52 | 160 | -6  |
| 5.36 | 150 | -6  |
| 8.80 | 220 | 12  |
| 8.52 | 230 | 2   |
| 8.52 | 230 | 1   |



|      |     |     |
|------|-----|-----|
| 7.86 | 220 | -1  |
| 7.59 | 220 | -5  |
| 7.78 | 210 | -6  |
| 8.15 | 220 | -7  |
| 7.50 | 210 | -6  |
| 7.50 | 210 | -7  |
| 7.50 | 210 | -8  |
| 7.50 | 210 | -7  |
| 6.90 | 200 | -6  |
| 6.67 | 180 | 1   |
| 6.67 | 180 | -6  |
| 6.43 | 180 | -2  |
| 6.43 | 180 | -3  |
| 6.43 | 180 | -5  |
| 6.07 | 170 | -3  |
| 6.79 | 190 | -4  |
| 6.07 | 170 | -9  |
| 7.14 | 200 | -7  |
| 6.67 | 180 | -9  |
| 6.30 | 170 | -10 |
| 5.86 | 170 | -7  |
| 6.21 | 180 | -13 |
| 6.06 | 200 | -20 |
| 6.36 | 210 | -20 |
| 6.36 | 210 | -18 |
| 5.88 | 200 | -20 |
| 6.18 | 210 | -19 |
| 6.18 | 210 | -22 |
| 5.81 | 180 | -6  |
| 5.94 | 190 | -6  |
| 5.45 | 180 | -8  |
| 5.45 | 180 | -9  |
| 5.15 | 170 | -8  |
| 5.00 | 170 | -9  |
| 5.15 | 170 | -12 |
| 4.71 | 160 | -14 |
| 6.79 | 190 | -14 |
| 6.67 | 180 | -15 |
| 6.07 | 170 | -13 |
| 6.43 | 180 | -17 |
| 6.13 | 190 | -17 |
| 6.13 | 190 | -19 |
| 5.63 | 180 | -20 |
| 6.13 | 190 | -19 |
| 8.89 | 160 | -27 |
| 5.94 | 190 |     |
| 5.00 | 170 | -18 |
| 4.85 | 160 | -7  |
| 5.14 | 180 | -7  |
| 4.85 | 160 | -34 |
| 4.85 | 160 | -31 |
| 4.85 | 160 | -33 |

|      |     |     |
|------|-----|-----|
| 6.43 | 180 | 4   |
| 6.33 | 190 | 0   |
| 5.94 | 190 | -9  |
| 6.25 | 200 | -19 |
| 5.76 | 190 | -22 |
| 5.76 | 190 | -23 |
| 5.76 | 190 | -23 |
| 5.29 | 180 | -27 |
| 6.11 | 220 | -15 |
| 6.57 | 230 | -8  |
| 5.56 | 200 | -2  |
| 5.28 | 190 | -13 |
| 5.43 | 190 | -11 |
| 5.43 | 190 | -18 |
| 5.14 | 180 | -17 |
| 5.43 | 190 | -18 |
| 5.14 | 180 | -20 |
| 4.72 | 170 | -18 |
| 4.86 | 170 | -22 |
| 8.57 | 180 | -21 |
| 7.60 | 190 | -20 |
| 7.04 | 190 | -23 |
| 6.55 | 190 | -21 |
| 6.79 | 190 | -26 |
| 7.41 | 200 | -23 |
| 6.25 | 200 | -24 |
| 6.77 | 210 | -27 |
| 5.71 | 200 | -24 |
| 6.18 | 210 | -27 |
| 6.06 | 200 | -29 |
| 6.56 | 210 | -34 |
| 6.67 | 240 | -14 |
| 6.29 | 220 | -16 |
| 5.56 | 200 | -22 |
| 6.29 | 220 | -24 |
| 5.71 | 200 |     |
| 5.56 | 200 | -18 |
| 5.43 | 190 | -29 |
| 5.14 | 180 | -29 |
| 5.14 | 180 | -31 |
| 5.14 | 180 | -33 |
| 7.43 | 260 | -39 |
| 5.56 | 200 | -24 |
| 6.55 | 190 | -5  |
| 6.13 | 190 | -10 |
| 6.06 | 200 | -6  |
| 6.00 | 210 | -12 |
| 5.56 | 200 | -10 |
| 6.00 | 210 | -14 |
| 6.00 | 210 | -20 |
| 5.71 | 200 | -23 |
| 5.71 | 200 | -20 |

|      |     |     |
|------|-----|-----|
| 5.14 | 180 |     |
| 5.41 | 200 | -25 |
| 5.43 | 190 | -18 |
| 8.00 | 200 | 0   |
| 7.50 | 210 | -15 |
| 7.78 | 210 | -19 |
| 7.33 | 220 | -18 |
| 7.42 | 230 | -11 |
| 7.10 | 220 | -19 |
| 6.67 | 220 | -15 |
| 6.88 | 220 | -18 |
| 6.39 | 230 | -17 |
| 6.47 | 220 | -22 |
| 6.57 | 230 | -24 |
| 6.76 | 230 | -26 |
| 8.00 | 320 | -8  |
| 8.10 | 340 | -4  |
| 8.92 | 330 | -16 |
| 7.11 | 320 | -37 |
| 8.25 | 330 | -32 |
| 7.50 | 330 | -32 |
| 7.62 | 320 | -24 |
| 7.33 | 330 | -30 |
| 8.06 | 250 | -22 |
| 8.00 | 240 | -26 |
| 8.57 | 240 | -38 |
| 9.23 | 240 | -22 |
| 8.33 | 250 |     |
| 8.44 | 270 | -32 |
| 8.44 | 270 | -33 |
| 8.53 | 290 | -31 |
| 7.75 | 310 | -31 |
| 7.89 | 300 | -26 |
| 7.62 | 320 | -29 |
| 7.67 | 330 | -29 |
| 7.33 | 330 | -32 |
| 8.10 | 340 | -31 |
| 8.18 | 270 | -32 |
| 8.62 | 250 | -22 |
| 7.81 | 250 | -14 |
| 7.88 | 260 | -22 |
| 7.43 | 260 | -35 |
| 7.43 | 260 | -39 |
| 7.03 | 260 | -41 |
| 6.83 | 280 | -37 |
| 7.27 | 320 | -32 |
| 6.92 | 270 | -37 |
| 6.38 | 300 | -17 |
| 6.73 | 330 | -17 |
| 6.53 | 320 | -24 |
| 6.12 | 300 | -26 |
| 6.12 | 300 | -26 |

|      |     |     |
|------|-----|-----|
| 6.21 | 360 | -32 |
| 7.22 | 390 | -28 |
| 6.61 | 370 | -28 |
| 5.51 | 270 | 13  |
| 5.31 | 260 | 10  |
| 5.31 | 260 | 8   |
| 5.09 | 270 | 7   |
| 5.00 | 270 | 6   |
| 4.82 | 270 | 1   |
| 4.91 | 270 | -1  |
| 4.56 | 260 | -5  |
| 4.82 | 270 | -7  |
| 4.48 | 260 | -7  |
| 4.58 | 270 | -12 |
| 5.71 | 240 | 1   |
| 6.52 | 300 |     |
| 5.88 | 300 | -2  |
| 5.96 | 310 | -2  |
| 6.20 | 310 | -4  |
| 6.27 | 320 | -6  |
| 5.82 | 320 | -19 |
| 7.88 | 260 | 19  |
| 7.11 | 270 | 12  |
| 7.11 | 270 | 13  |
| 7.00 | 280 | 10  |
| 6.83 | 280 | 11  |
| 6.74 | 290 | 9   |
| 6.83 | 280 | 4   |
| 6.82 | 300 | 7   |
| 6.59 | 290 | 6   |
| 5.83 | 280 | 5   |
| 6.09 | 280 | 4   |
| 5.71 | 280 | 5   |
| 6.56 | 210 | 24  |
| 5.95 | 220 | 23  |
| 6.58 | 250 | 18  |
| 6.67 | 240 | 22  |
| 6.00 | 240 | 17  |
| 6.00 | 240 | 19  |
| 5.85 | 240 | 19  |
| 6.10 | 250 | 24  |
| 5.95 | 250 | 24  |
| 5.81 | 250 |     |
| 6.05 | 260 | 1   |
| 5.68 | 250 | 16  |
| 5.59 | 190 | 11  |
| 6.29 | 220 | 7   |
| 6.11 | 220 | 11  |
| 5.95 | 220 | 8   |
| 6.43 | 270 | 4   |
| 6.51 | 280 | 2   |
| 6.36 | 280 | 1   |

|       |     |     |
|-------|-----|-----|
| 6.09  | 280 | -3  |
| 6.09  | 280 | 6   |
| 5.71  | 280 | 5   |
| 5.96  | 280 | -10 |
| 6.04  | 290 | -12 |
| 4.42  | 84  | 26  |
| 4.47  | 85  | 24  |
| 4.47  | 85  | 28  |
| 4.37  | 83  | 21  |
| 4.58  | 87  | 12  |
| 4.47  | 85  | 17  |
| 7.06  | 120 | 28  |
| 6.67  | 120 | 25  |
| 7.06  | 120 | 21  |
| 7.65  | 130 | 21  |
| 7.65  | 130 | 21  |
| 6.11  | 110 | 15  |
| 5.88  | 100 | 27  |
| 5.76  | 98  | 28  |
| 5.22  | 94  | 19  |
| 5.17  | 93  | 16  |
| 5.11  | 92  | 17  |
| 5.06  | 91  | 23  |
| 7.65  | 130 | 24  |
| 8.24  | 140 | 32  |
| 7.22  | 130 | 21  |
| 6.67  | 120 | 20  |
| 7.06  | 120 | 19  |
| 7.65  | 130 | 23  |
| 8.52  | 230 | 24  |
| 7.14  | 200 | 6   |
| 7.14  | 200 | 12  |
| 7.78  | 210 | 28  |
| 7.41  | 200 | 5   |
| 7.78  | 210 | 12  |
| 7.50  | 210 | 5   |
| 7.04  | 190 | -1  |
| 10.83 | 260 | 54  |
| 10.38 | 270 | 61  |
| 11.54 | 300 | 39  |
| 10.37 | 280 | 35  |
| 11.48 | 310 | 32  |
| 10.74 | 290 | 36  |
| 10.00 | 280 | 37  |
| 11.54 | 300 | 38  |
| 8.93  | 250 | 29  |
| 10.69 | 310 | 27  |
| 10.69 | 310 | 22  |
| 11.79 | 330 | 20  |
| 9.09  | 200 | 25  |
| 9.09  | 200 |     |

|       |     |     |
|-------|-----|-----|
| 8.70  | 200 | 23  |
| 8.00  | 200 | 21  |
| 8.33  | 200 | 18  |
| 8.40  | 210 | 17  |
| 8.46  | 220 | 15  |
| 8.46  | 220 | 12  |
| 7.59  | 220 | 7   |
| 8.15  | 220 | -5  |
| 8.15  | 220 | -1  |
| 8.46  | 220 | -9  |
| 10.59 | 180 | 17  |
| 10.56 | 190 | 14  |
| 10.56 | 190 | 16  |
| 9.47  | 180 | 13  |
| 10.00 | 190 | 6   |
| 10.00 | 190 | 7   |
| 8.64  | 190 | 3   |
| 9.05  | 190 | 1   |
| 9.05  | 190 | 2   |
| 8.64  | 190 | 1   |
| 8.26  | 190 | -5  |
| 9.52  | 200 | -3  |
| 10.00 | 200 | -1  |
| 10.00 | 220 | -3  |
| 10.00 | 210 | -2  |
| 8.75  | 210 | -9  |
| 9.13  | 210 | -6  |
| 8.75  | 210 | -8  |
| 9.17  | 220 | -6  |
| 8.40  | 210 | -11 |
| 8.40  | 210 | -11 |
| 8.15  | 220 | -15 |
| 9.09  | 200 | -18 |
| 9.09  | 200 | 8   |
| 8.70  | 200 | 8   |
| 9.13  | 210 | 6   |
| 7.86  | 220 | -1  |
| 7.78  | 210 | -1  |
| 7.59  | 220 | -4  |
| 8.75  | 210 | 6   |
| 5.37  | 220 | 23  |
| 5.61  | 230 | 23  |
| 5.61  | 230 | 19  |
| 6.58  | 250 |     |
| 5.48  | 230 | 29  |
| 5.37  | 220 | 22  |
| 6.67  | 240 | 16  |
| 7.27  | 240 | 27  |
| 8.75  | 280 | -16 |
| 9.63  | 260 | 6   |
| 9.03  | 280 | -2  |

|       |     |     |
|-------|-----|-----|
| 8.48  | 280 | -13 |
| 9.66  | 280 | 2   |
| 9.31  | 270 | -8  |
| 10.38 | 270 | 8   |
| 9.00  | 270 | -11 |
| 7.50  | 150 | 51  |
| 7.50  | 150 | 33  |
| 7.00  | 140 | 25  |
| 7.37  | 140 | 27  |
| 7.89  | 150 | 16  |
| 7.50  | 150 | 14  |
| 7.00  | 140 | 16  |
| 7.00  | 140 | -4  |
| 9.60  | 240 | 22  |
| 8.28  | 240 |     |
| 8.62  | 250 | 19  |
| 8.33  | 250 | 9   |
| 8.13  | 260 | 5   |
| 8.39  | 260 |     |
| 7.43  | 260 | 0   |
| 8.39  | 260 | 1   |

Compliance dynamic(mlcmH2O)

VT expiratory(ml)

Glomerular Filtration -TP

| IAP TP press (mmHg) | Glomerular Filtration -TG | IAP TG press(mmHg) | Glomerular Filtration -TV |
|---------------------|---------------------------|--------------------|---------------------------|
| 0                   | 47.4                      | 1.3                | 44                        |
| 1                   | 34.1                      | 7.95               | 41                        |
| 0                   | 48.2                      | 1.4                | 42                        |
| 1                   | 47.6                      | 2.2                | 45.6                      |
| 1                   | 30.4                      | 8.8                | 42                        |
| 0                   | 48                        | 2                  | 40                        |
| 1                   | 51.8                      | 2.1                | 49                        |
| 1                   | 45.6                      | 6.2                | 49.4                      |
| 1                   | 49.2                      | 4.9                | 49                        |
| 1                   | 52                        | 5.5                | 54                        |
| 1                   | 54.2                      | 5.4                | 58                        |
| 1                   | 70.2                      | 4.4                | 71                        |
| 1                   | 53.8                      | 4.6                | 54                        |
| 1                   | 87                        | 5                  | 90                        |
| 0                   | 64.2                      | 1.4                | 53                        |
| 0                   | 53.8                      | 2.6                | 53                        |
| 0                   | 66.8                      | 1.6                | 64                        |
| 0                   | 54.8                      | 2.6                | 56                        |
| 0                   | 49.2                      | 1.9                | 47                        |
| 0                   | 65.2                      | 2.4                | 65                        |
| 0                   | 59.8                      | 2.6                | 59                        |
| 2                   | 51.6                      | 1.2                | 48                        |
| 1                   | 52                        | 1.5                | 35                        |
| 2                   | 58.6                      | 1.2                | 51                        |
| 1                   | 57.6                      | 1.7                | 43                        |
| 2                   | 54                        | 1.5                | 46                        |
| 2                   | 50.6                      | 1.7                | 47                        |
| 2                   | 47.6                      | 1.2                | 42                        |
| 1                   | 71.6                      | 6.7                | 78                        |
| 2                   | 73                        | 5.5                | 78                        |
| 1                   | 70.2                      | 6.4                | 77                        |
| 2                   | 72.6                      | 5.2                | 77                        |
| 2                   | 66.6                      | 6.7                | 74                        |
| 2                   | 59.2                      | 5.9                | 67                        |
| 2                   | 62                        | 6                  | 68                        |
| 15                  | 26                        | 20                 | 26                        |
| 15                  | 23.4                      | 22.3               | 30                        |
| 15                  | 27.2                      | 20.4               | 28                        |
| 15                  | 20.2                      | 21.9               | 24                        |
| 16                  | 22.6                      | 20.2               | 23                        |
| 16                  | 14.8                      | 21.6               | 18                        |
| 15                  | 13                        | 20                 | 13                        |
| 20                  | 25.4                      | 18.3               | 22                        |
| 20                  | 28.8                      | 18.1               | 25                        |
| 21                  | 24.2                      | 17.9               | 20                        |
| 21                  | 20                        | 18.5               | 18                        |
| 20                  | 20.6                      | 17.2               | 16                        |
| 21                  | 15                        | 18.5               | 13                        |
| 21                  | 13.2                      | 17.4               | 9                         |
| 21                  | 27.8                      | 20.1               | 31                        |
| 22                  | 30.8                      | 19.6               | 33                        |



|    |      |      |      |
|----|------|------|------|
| 21 | 30.2 | 18.9 | 22   |
| 21 | 22.4 | 19.8 | 22   |
| 22 | 19.6 | 19.2 | 12.4 |
| 21 | 16.8 | 19.6 | 19   |
| 21 | 17.6 | 19.2 | 15   |
| 21 | 14.6 | 19.7 | 13   |
| 21 | 15   | 19.5 | 15   |
| 20 | 18   | 19   | 16   |
| 20 | 7.6  | 19.2 | 7    |
| 21 | 4.2  | 19.4 | 4    |
| 20 | 2    | 19   | 2    |
| 21 | 8.8  | 19.6 | 8    |
| 19 | 14   | 17   | 14   |
| 18 | 9.6  | 18.2 | 7    |
| 23 | 28   | 19   | 24   |
| 15 | 23.8 | 18.1 | 26   |
| 16 | 11.4 | 16.8 | 6    |
| 19 | 24   | 19   | 22   |
| 16 | 13.8 | 18.1 | 12   |
| 23 | 10   | 20   | 9    |
| 22 | 9.2  | 19.9 | 8    |
| 22 | 7.2  | 20.4 | 7    |
| 22 | 5    | 20.5 | 5    |
| 22 | 4    | 19.5 | 2    |
| 22 | 2.2  | 19.4 | 0    |
| 22 | -1.4 | 19.2 | -4   |
| 22 | 1    | 19.5 | -1   |
| 22 | -4.8 | 19.4 | -7   |
| 23 | -4.8 | 19.4 | -7   |
| 22 | -7.6 | 19.3 | -10  |
| 20 | 2.6  | 20.2 | 3    |
| 21 | 0.2  | 20.4 | 1    |
| 21 | 0.4  | 19.3 | -2   |
| 21 | -1.6 | 19.8 | -3   |
| 21 | 0.8  | 19.1 | -11  |
| 21 | -6.8 | 19.9 | -7   |
| 21 | -6.8 | 18.9 | -6   |
|    |      |      | 0    |
| 23 | 15.6 | 17.2 | 9    |
| 23 | 16.4 | 18.8 | 14   |
| 23 | 23.2 | 17.4 | 18   |
| 23 | 18.4 | 15.8 | 9    |
| 23 | 11.4 | 17.8 | 7    |
| 23 | 9.2  | 16.9 | 2    |
| 22 | 2    | 17.5 | -4   |
| 23 | 5.4  | 17.8 | 1    |
| 23 | 5    | 18   | 0    |
| 23 | 6.6  | 16.7 | -2   |
| 23 | 7    | 16.5 | 0    |
| 19 | 10.8 | 19.6 | 8    |
| 20 | 4    | 19   | -1   |
| 20 | 0.6  | 20.2 | -2   |

|    |       |      |     |
|----|-------|------|-----|
| 20 | 0.8   | 19.1 | -4  |
| 20 | -5    | 20   | -8  |
| 20 | -4.4  | 19.2 | -5  |
| 20 | -6    | 19.5 | -9  |
| 20 | -3    | 18.5 | -8  |
| 20 | -3.8  | 18.4 | -9  |
| 20 | -5.8  | 18.9 | -10 |
| 20 | -2.4  | 17.7 | -7  |
| 19 | -4.4  | 18.2 | -7  |
| 21 | 7.6   | 17.7 | 2   |
| 21 | 1     | 17.5 | -5  |
| 21 | 4.6   | 17.7 | -2  |
| 21 | 4     | 17.5 | -3  |
| 21 | 1.6   | 17.7 | -5  |
| 20 | 2.4   | 17.3 | -5  |
| 20 | 0.8   | 17.6 | -6  |
| 21 | -2.6  | 17.8 | -8  |
| 20 | -1.6  | 17.3 | -8  |
| 21 | -2.4  | 17.7 | -8  |
| 21 | -2.6  | 17.3 | -10 |
| 30 | -1    | 27   | -6  |
| 32 | -0.2  | 25.6 | -10 |
| 33 | -11.8 | 28.9 | -15 |
| 33 | -5.4  | 25.7 | -15 |
| 31 | -10.6 | 27.3 | -18 |
| 32 | -5.6  | 24.8 | -16 |
| 32 | -11.2 | 28.1 | -15 |
| 33 | -7.8  | 25.9 | -18 |
| 30 | -4.8  | 29.4 | -4  |
| 29 | -5.4  | 28.7 | -6  |
| 30 | -4.2  | 28.1 | -4  |
| 30 | -5.6  | 28.3 | -7  |
| 30 | -5.2  | 28.6 | -6  |
| 30 | -6.4  | 28.7 | -8  |
| 30 | -8.4  | 28.2 | -4  |
| 30 | -9.6  | 27.8 | -12 |
| 32 | -8    | 29   | -4  |
| 32 | -9.4  | 29.2 | -7  |
| 32 | -7.2  | 29.1 | -7  |
| 34 | -9.8  | 30.4 | -9  |
| 32 | -9.6  | 28.3 | -9  |
| 32 | -12.6 | 28.8 | -13 |
| 32 | -17   | 30.5 | -12 |
| 31 | -17.2 | 30.1 | -15 |
| 34 | -15.2 | 28.1 | -20 |
| 35 |       | 28.1 |     |
| 35 | -2    | 27   | -8  |
| 34 | 12.4  | 24.3 | 1   |
| 34 | 8     | 26.5 | 3   |
| 35 | -23   | 29.5 | -21 |
| 34 | -17.4 | 27.2 | -22 |
| 34 | -18.8 | 26.9 | -23 |

|    |       |      |     |
|----|-------|------|-----|
| 32 | 11    | 28.5 | 8   |
| 32 | 7     | 28.5 | 4   |
| 31 | -1.8  | 27.4 | -7  |
| 34 | -4.8  | 26.9 | -11 |
| 36 | -7.6  | 28.8 | -10 |
| 35 | -9.4  | 28.2 | -12 |
| 34 | -13.4 | 29.2 | -15 |
| 35 | -15   | 29   | -17 |
| 33 | -8    | 29.5 | -9  |
| 34 | 3.6   | 28.2 | 0   |
| 33 | 6.8   | 28.6 | 3   |
| 33 | -6    | 29.5 | -7  |
| 31 | -6.4  | 28.7 | -9  |
| 31 | -12.6 | 28.3 | -17 |
| 31 | -11.2 | 28.1 | -16 |
| 30 | -16.6 | 29.3 | -18 |
| 30 | -18   | 29   | -20 |
| 29 | -20.8 | 30.4 | -20 |
| 28 | -24.4 | 29.2 | -26 |
| 33 | -15   | 30   | -15 |
| 33 | -15.4 | 30.7 | -14 |
| 34 | -18   | 31.5 | -15 |
| 33 | -12.8 | 28.9 | -14 |
| 34 | -20.4 | 31.2 | -17 |
| 32 | -17.4 | 29.2 | -18 |
| 33 | -22   | 32   | -17 |
| 34 | -18.6 | 29.8 | -18 |
| 32 | -24   | 32   | -19 |
| 33 | -22.8 | 30.9 | -20 |
| 33 | -28   | 32.5 | -22 |
| 34 | -26.4 | 30.2 | -27 |
| 32 | -8.8  | 29.4 | -10 |
| 32 | -12.2 | 30.1 | -12 |
| 34 | -15.2 | 30.6 | -14 |
| 34 | -15.6 | 29.8 | -16 |
| 35 |       | 29.4 |     |
| 33 | -8.4  | 28.2 | -12 |
| 35 | -16.8 | 28.9 | -19 |
| 36 | -18   | 30.5 | -16 |
| 35 | -20.4 | 29.7 | -23 |
| 35 | -23.2 | 30.1 | -25 |
| 36 | -26.8 | 29.9 | -25 |
| 35 | -13.8 | 29.9 | -14 |
| 29 | -6.2  | 29.6 | -8  |
| 29 | -12   | 30   | -13 |
| 29 | -6.4  | 29.2 | -9  |
| 30 | -13.2 | 30.6 | -14 |
| 29 | -14.4 | 31.2 | -13 |
| 29 | -20.6 | 32.3 | -16 |
| 29 | -23   | 30.5 | -23 |
| 29 | -26.8 | 30.9 | -26 |
| 28 | -25.8 | 30.9 | -24 |

|    |       |      |     |
|----|-------|------|-----|
| 29 |       | 30.1 |     |
| 29 | -26.8 | 29.9 | -28 |
| 29 | -21   | 30.5 | -19 |
| 29 | 0.4   | 28.8 | 2   |
| 31 | -12.6 | 29.8 | -13 |
| 31 | -13.4 | 28.2 | -16 |
| 30 | -14.6 | 28.3 | -16 |
| 27 | -12.8 | 27.9 | -16 |
| 29 | -18   | 28.5 | -19 |
| 28 | -14.8 | 27.9 | -18 |
| 27 | -18.2 | 27.1 | -23 |
| 27 | -19   | 28   | -22 |
| 29 | -22   | 29   | -24 |
| 28 | -24   | 28   | -28 |
| 26 | -26   | 26   | -34 |
| 35 | -14.6 | 38.3 | -18 |
| 36 | -6.2  | 37.1 | -12 |
| 38 | -14.4 | 37.2 | -19 |
| 42 | -32   | 39.5 | -33 |
| 38 | -33   | 38.5 | -36 |
| 41 | -29.4 | 39.7 | -30 |
| 39 | -17   | 35.5 | -25 |
| 39 | -26.2 | 37.1 | -32 |
| 48 |       | 40.1 |     |
| 44 | -7.8  | 34.9 | -12 |
| 48 | -11.6 | 34.8 | -12 |
| 39 | -19.8 | 37.9 | -22 |
| 42 |       | 35.1 |     |
| 37 | -21.4 | 31.7 | -30 |
| 41 | -26   | 37.5 | -29 |
| 43 | -28.6 | 41.8 | -25 |
| 42 | -29   | 41   | -27 |
| 40 | -26.2 | 40.1 | -26 |
| 41 | -26.8 | 39.9 | -27 |
| 39 | -27.6 | 38.3 | -29 |
| 40 | -28   | 38   | -30 |
| 39 | -27   | 37   | -23 |
| 41 | -26.4 | 38.2 | -29 |
| 38 | -24.4 | 39.2 | -26 |
| 38 | -15.2 | 38.6 | -16 |
| 40 | -22.4 | 40.2 | -22 |
| 42 | -28.8 | 38.9 | -31 |
| 41 | -33.4 | 38.2 | -37 |
| 42 | -35.2 | 39.1 | -37 |
| 40 | -34.8 | 38.9 | -37 |
| 36 | -32   | 36   | -30 |
| 39 | -35.2 | 38.1 | -39 |
| 41 | -18   | 41.5 | -15 |
| 41 | -16.8 | 40.9 | -15 |
| 43 | -18.4 | 40.2 | -18 |
| 43 | -22.6 | 41.3 | -20 |
| 43 | -24.2 | 42.1 | -20 |

|    |       |      |       |
|----|-------|------|-------|
| 43 | -31.8 | 42.9 | -26   |
| 37 | -28.2 | 37.1 | -34   |
| 37 | -28.4 | 37.2 | -34   |
| 42 | 16    | 39   | 16.5  |
| 40 | 14.1  | 35.9 | 11    |
| 40 | 12.7  | 35.3 | 9     |
| 39 | 11.8  | 34.2 | 10    |
| 38 | 10    | 34   | 10.1  |
| 41 | 7.3   | 34.7 | 7     |
| 40 | 4.2   | 34.8 | 3.5   |
| 41 | -0.1  | 36.1 | 1     |
| 38 | -3.7  | 34.7 | -4    |
| 39 | -2.7  | 34.7 | -3    |
| 39 | -7.3  | 34.3 | -11.5 |
| 50 | 9     | 42   | 11    |
| 42 |       | 42   |       |
| 45 | 6.1   | 36.9 | 3     |
| 44 | 7.4   | 34.6 | 2     |
| 41 | 1.8   | 35.2 | -3    |
| 37 | -0.8  | 31.8 | -9    |
| 40 | -15.5 | 36.5 | -19   |
| 37 | 23.3  | 32.7 | 23    |
| 44 | 17.7  | 38.3 | 18    |
| 41 | 18.3  | 35.7 | 20    |
| 44 | 14.2  | 39.8 | 22    |
| 41 | 14.7  | 37.3 | 21    |
| 42 | 12.2  | 38.8 | 15    |
| 42 | 8.1   | 37.9 | 8     |
| 42 | 8.9   | 40.1 | 12    |
| 41 | 10.1  | 36.9 | 10    |
| 42 | 6.8   | 40.2 | 7     |
| 41 | 5.8   | 39.2 | 8     |
| 42 | 8.6   | 38.4 | 9     |
| 44 | 29.3  | 38.7 | 28    |
| 47 | 28.5  | 41.5 | 30    |
| 42 | 25.4  | 34.6 | 25    |
| 39 | 29.6  | 31.4 | 26    |
| 45 | 25.3  | 36.7 | 25    |
| 44 | 25.8  | 37.2 | 26    |
| 43 | 24.4  | 37.6 | 25    |
| 42 | 28.6  | 37.4 | 31    |
| 45 | 29.3  | 39.7 | 34    |
| 44 |       | 39.1 |       |
| 43 | 8.5   | 35.5 | 16    |
| 44 | 23.9  | 36.1 | 26    |
| 47 | 16.8  | 41.2 | 19    |
| 48 | 13.6  | 41.4 | 16    |
| 44 | 16.1  | 38.9 | 16    |
| 47 | 16.2  | 38.8 | 16    |
| 44 | 12    | 36   | 12    |
| 44 | 9.9   | 36.1 | 10    |
| 45 | 9.6   | 36.4 | 8     |

|    |       |      |     |
|----|-------|------|-----|
| 47 | 4.9   | 39.1 | 7   |
| 44 | 13.2  | 36.8 | 13  |
| 46 | 11.8  | 39.2 | 15  |
| 44 | -1.9  | 35.9 | -3  |
| 47 | -3.8  | 38.8 | 0   |
| 11 | 39    | 4.5  | -3  |
| 10 | 36.8  | 3.6  | -7  |
| 10 | 32.2  | 7.9  | -2  |
| 11 | 29.2  | 6.9  | -8  |
| 9  | 15.4  | 7.3  | -15 |
| 10 | 23.2  | 6.9  | -7  |
| 10 | 34.6  | 6.7  | 8   |
| 10 | 32.4  | 6.3  | 5   |
| 11 | 32.6  | 5.2  | 1   |
| 10 | 30    | 5.5  | -7  |
| 9  | 28.2  | 5.4  | -7  |
| 13 | 29.4  | 5.8  | -2  |
| 15 | 22.2  | 17.4 | 17  |
| 14 | 19.8  | 18.1 | 16  |
| 15 | 16    | 16.5 | 9   |
| 14 | 9.4   | 17.3 | 4   |
| 15 | 9.4   | 18.8 | 11  |
| 16 | 17    | 19   | 15  |
| 13 | 5.8   | 22.1 | 14  |
| 16 | 24    | 20   | 26  |
| 15 | 0.6   | 25.2 | 15  |
| 23 | 16.8  | 24.6 | 27  |
| 19 | 10.6  | 23.2 | 19  |
| 14 | 5     | 23   | 12  |
| 14 | 12    | 20   | 3   |
| 11 | -12.4 | 20.2 | -19 |
| 10 | -8.2  | 20.1 | -16 |
| 11 | 8     | 21   | 1   |
| 12 | -11.6 | 20.3 | -18 |
| 11 | -5.4  | 19.7 | -14 |
| 12 | -10.8 | 19.9 | -18 |
| 14 | -16.6 | 21.8 | -20 |
| 15 | 44    | 20   | 42  |
| 16 | 50.8  | 21.1 | 48  |
| 15 | 28.6  | 20.2 | 25  |
| 16 | 24    | 21.5 | 24  |
| 15 | 21.4  | 20.3 | 20  |
| 16 | 27.4  | 20.3 | 26  |
| 16 | 25.8  | 21.6 | 26  |
| 15 | 26.8  | 20.6 | 25  |
| 16 | 18.2  | 21.4 | 18  |
| 15 | 15.8  | 20.6 | 15  |
| 16 | 12.6  | 20.7 | 12  |
| 16 | 11.8  | 20.1 | 10  |
| 14 | 13.6  | 19.7 | 13  |
| 11 |       | 18.5 |     |

|      |       |      |     |
|------|-------|------|-----|
| 13   | 9.2   | 19.9 | 8   |
| 10   | -0.6  | 20.8 | -3  |
| 9    | -6    | 21   | -4  |
| 9    | -5.2  | 20.1 | -5  |
| 10   | -6.6  | 20.8 | -5  |
| 11   | -5.2  | 19.6 | -6  |
| 14   | -6    | 20.5 | -5  |
| 17   | -10.2 | 19.6 | -11 |
| 15   | -9    | 19   | -9  |
| 17   | -15   | 20   | -15 |
| 21   | 18.4  | 20.3 | 19  |
| 23   | 17.8  | 21.1 | 19  |
| 22   | 18.2  | 20.9 | 19  |
| 22   | 16.8  | 20.1 | 17  |
| 24   | 10.4  | 21.8 | 14  |
| 22   | 12    | 19.5 | 11  |
| 23   | 9.8   | 19.6 | 8   |
| 23   | 6     | 20.5 | 7   |
| 23   | 8.8   | 19.6 | 8   |
| 22   | 5.8   | 19.6 | 5   |
| 24   | 3.2   | 19.9 | 3   |
| 21   | -1    | 20   | -2  |
| 20   | -1    | 20   | -1  |
| 21   | -1    | 20   | -1  |
| 20   | -2    | 20   | -2  |
| 23   | -3.2  | 20.1 | -5  |
| 21   | -3    | 19.5 | -6  |
| 22   | -4.8  | 20.4 | -4  |
| 21   | -3.6  | 19.8 | -4  |
| 22   | -7.4  | 20.2 | -9  |
| 21   | -11.4 | 21.2 | -9  |
| 24   | -9.2  | 21.1 | -8  |
| 30   | -8.4  | 25.2 | -18 |
| 31   | 19.4  | 25.3 | 9   |
| 31   | 19.8  | 25.1 | 8   |
| 30   | 19    | 23.5 | 5   |
| 30   | 11.2  | 23.9 | -3  |
| 31   | 10.2  | 25.4 | -1  |
| 30   | 4.8   | 25.6 | -6  |
| 31   | 19.2  | 24.4 | 7   |
| 32   | 35    | 26   | 28  |
| 31   | 19    | 33   | 25  |
| 30   | 13    | 33   | 19  |
| 36   |       | 33   |     |
| 32   | 25.8  | 33.6 | 34  |
| 30   | 23.4  | 29.3 | 22  |
| 29.5 | 23    | 26   | 15  |
| 30   | 37    | 25   | 27  |
| 42   | 7.4   | 30.3 | -9  |
| 32   | 14.8  | 27.6 | 9   |
| 38   | 17    | 28.5 | 10  |

|    |       |      |     |
|----|-------|------|-----|
| 39 | -6    | 35.5 | -1  |
| 35 | 11.4  | 30.3 | 10  |
| 36 | 1.8   | 31.1 | 3   |
| 37 | 22    | 30   | 20  |
| 37 | 3     | 30   | 1   |
| 15 | 18    | 31.5 | 21  |
| 15 | 2.2   | 30.4 | 3   |
| 19 | 2.2   | 30.4 | 3   |
| 21 | 6.2   | 31.4 | 8   |
| 18 | -12.2 | 32.1 | -10 |
| 15 | -16   | 30   | -16 |
| 13 | -19.6 | 30.8 | -18 |
| 22 | -24   | 32   | -20 |
| 17 | -3.4  | 29.7 | 22  |
| 22 |       | 32.7 |     |
| 22 | 2.6   | 30.2 | 19  |
| 21 | -9.6  | 30.3 | 9   |
| 23 | -7.6  | 29.3 | 5   |
| 24 |       | 32.7 |     |
| 23 | -17   | 31.5 | 2   |
| 22 | -14   | 29.5 | 1   |

IAP TP press (mmHg)    Glomerular Filtration -TG    IAP TG press(mmHg)    Glomerular Filtration -TV



| IAP TV press(mmHg) | Mean IAP TP | Mean IAP TG | Mean IAP TV | IAP mean | IAP bias | Urine (ml) |
|--------------------|-------------|-------------|-------------|----------|----------|------------|
| 3                  |             |             |             |          | -1.7     | 275.8      |
| 4.5                |             |             |             |          | 3.45     | 272.4      |
| 4.5                |             |             |             |          | -3.1     | 262.2      |
| 3.2                |             |             |             |          | -1       | 257        |
| 3                  |             |             |             |          | 5.8      | 256        |
| 6                  |             |             |             |          | -4       | 248.8      |
| 3.5                | 1.0         | 4.7         | 4.2         | 4.5      | -1.4     | 201.1      |
| 4.3                |             |             |             |          | 1.9      | 162.4      |
| 5                  |             |             |             |          | -0.1     | 161.8      |
| 4.5                |             |             |             |          | 1        | 142.2      |
| 3.5                |             |             |             |          | 1.9      | 132.3      |
| 4                  |             |             |             |          | 0.4      | 120.5      |
| 4.5                |             |             |             |          | 0.1      | 140.5      |
| 3.5                | 0.1         | 2.5         | 3.4         | 3.0      | 1.5      | 90.6       |
| 7                  |             |             |             |          | -5.6     | 191        |
| 3                  |             |             |             |          | -0.4     | 163.2      |
| 3                  |             |             |             |          | -1.4     | 139.9      |
| 2                  |             |             |             |          | 0.6      | 133.3      |
| 3                  |             |             |             |          | -1.1     | 107.6      |
| 2.5                | 1.1         | 1.7         | 5.4         | 3.6      | -0.1     | 74.6       |
| 3                  |             |             |             |          | -0.4     | 92         |
| 3                  |             |             |             |          | -1.8     | 143.3      |
| 10                 |             |             |             |          | -8.5     | 133.9      |
| 5                  |             |             |             |          | -3.8     | 111        |
| 9                  |             |             |             |          | -7.3     | 108.4      |
| 5.5                |             |             |             |          | -4       | 106.5      |
| 3.5                |             |             |             |          | -1.8     | 104.6      |
| 4                  | 1.7         | 5.4         | 3.1         | 4.2      | -2.8     | 99.7       |
| 3.5                | 1.7         | 6.1         | 2.9         | 4.5      | 3.2      | 33.2       |
| 3                  |             |             |             |          | 2.5      | 48.4       |
| 3                  |             |             |             |          | 3.4      | 35.8       |
| 3                  |             |             |             |          | 2.2      | 85.2       |
| 3                  |             |             |             |          | 3.7      | 51.1       |
| 2                  |             |             |             |          | 3.9      | 88.2       |
| 3                  |             |             |             |          | 3        | 65.6       |
| 20                 | 15.3        | 20.9        | 19.9        | 20.4     | 0        | 57.5       |
| 19                 |             |             |             |          | 3.3      | 63.8       |
| 20                 |             |             |             |          | 0.4      | 83         |
| 20                 |             |             |             |          | 1.9      | 83.6       |
| 20                 |             |             |             |          | 0.2      | 90.6       |
| 20                 |             |             |             |          | 1.6      | 91.6       |
| 20                 |             |             |             |          | 0        | 93.2       |
| 20                 | 20.6        | 18.0        | 19.7        | 18.9     | -1.7     | 146.5      |
| 20                 |             |             |             |          | -1.9     | 147.4      |
| 20                 |             |             |             |          | -2.1     | 156.3      |
| 19.5               |             |             |             |          | -1       | 157.2      |
| 19.5               |             |             |             |          | -2.3     | 159.2      |
| 19.5               |             |             |             |          | -1       | 160.1      |
| 19.5               |             |             |             |          | -2.1     | 160.4      |
| 18.5               | 21.3        | 19.5        | 20.3        | 19.9     | 1.6      | 24.5       |
| 18.5               |             |             |             |          | 1.1      | 24.5       |

|      |      |      |      |      |      |      |
|------|------|------|------|------|------|------|
| 23   |      |      |      |      | -4.1 | 26.5 |
| 20   |      |      |      |      | -0.2 | 26.5 |
| 22.8 |      |      |      |      | -3.6 | 26.6 |
| 18.5 |      |      |      |      | 1.1  | 27.6 |
| 20.5 |      |      |      |      | -1.3 | 27.8 |
| 20.5 | 20.6 | 19.3 | 19.7 | 19.5 | -0.8 | 63.2 |
| 19.5 |      |      |      |      | 0    | 64.2 |
| 20   |      |      |      |      | -1   | 65.8 |
| 19.5 |      |      |      |      | -0.3 | 67.1 |
| 19.5 |      |      |      |      | -0.1 | 68.5 |
| 19   |      |      |      |      | 0    | 71.4 |
| 20   |      |      |      |      | -0.4 | 66.7 |
| 17   |      |      |      |      | 0    | 47.4 |
| 19.5 |      |      |      |      | -1.3 | 39.6 |
| 21   | 19.1 | 18.7 | 19.6 | 19.2 | -2   | 34.4 |
| 17   |      |      |      |      | 1.1  | 37.2 |
| 19.5 |      |      |      |      | -2.7 | 38.6 |
| 20   |      |      |      |      | -1   | 35.7 |
| 19   |      |      |      |      | -0.9 | 37.3 |
| 20.5 | 22.2 | 19.7 | 20.5 | 20.1 | -0.5 | 29.8 |
| 20.5 |      |      |      |      | -0.6 | 30.1 |
| 20.5 |      |      |      |      | -0.1 | 30.2 |
| 20.5 |      |      |      |      | 0    | 31.6 |
| 20.5 |      |      |      |      | -1   | 32.3 |
| 20.5 |      |      |      |      | -1.1 | 32.4 |
| 20.5 |      |      |      |      | -1.3 | 33.1 |
| 20.5 |      |      |      |      | -1   | 33.1 |
| 20.5 |      |      |      |      | -1.1 | 33.1 |
| 20.5 |      |      |      |      | -1.1 | 33.1 |
| 20.5 |      |      |      |      | -1.2 | 33.4 |
| 20   | 20.9 | 19.7 | 20.6 | 20.2 | 0.2  | 29.3 |
| 20   |      |      |      |      | 0.4  | 29.6 |
| 20.5 |      |      |      |      | -1.2 | 29.8 |
| 20.5 |      |      |      |      | -0.7 | 30.7 |
| 25   |      |      |      |      | -5.9 | 30.7 |
| 20   |      |      |      |      | -0.1 | 30.7 |
| 18.5 |      |      |      |      | 0.4  | 30.7 |
|      |      |      |      |      | 0    |      |
| 20.5 | 22.9 | 17.3 | 20.3 | 18.8 | -3.3 | 28.6 |
| 20   |      |      |      |      | -1.2 | 29.6 |
| 20   |      |      |      |      | -2.6 | 30.4 |
| 20.5 |      |      |      |      | -4.7 | 30.6 |
| 20   |      |      |      |      | -2.2 | 31.4 |
| 20.5 |      |      |      |      | -3.6 | 32   |
| 20.5 |      |      |      |      | -3   | 32.3 |
| 20   |      |      |      |      | -2.2 | 32   |
| 20.5 |      |      |      |      | -2.5 | 32.2 |
| 21   |      |      |      |      | -4.3 | 32   |
| 20   |      |      |      |      | -3.5 | 32.2 |
| 21   | 19.8 | 19.0 | 20.8 | 19.9 | -1.4 | 25.7 |
| 21.5 |      |      |      |      | -2.5 | 25.7 |
| 21.5 |      |      |      |      | -1.3 | 26.3 |

|      |      |      |      |      |      |       |
|------|------|------|------|------|------|-------|
| 21.5 |      |      |      |      | -2.4 | 26.7  |
| 21.5 |      |      |      |      | -1.5 | 26.7  |
| 19.5 |      |      |      |      | -0.3 | 26.7  |
| 21   |      |      |      |      | -1.5 | 26.8  |
| 21   |      |      |      |      | -2.5 | 26.8  |
| 21   |      |      |      |      | -2.6 | 26.8  |
| 21   |      |      |      |      | -2.1 | 26.8  |
| 20   |      |      |      |      | -2.3 | 26.8  |
| 19.5 |      |      |      |      | -1.3 | 26.8  |
| 20.5 | 20.7 | 17.6 | 20.8 | 19.2 | -2.8 | 23.1  |
| 20.5 |      |      |      |      | -3   | 23.1  |
| 21   |      |      |      |      | -3.3 | 23.1  |
| 21   |      |      |      |      | -3.5 | 24.3  |
| 21   |      |      |      |      | -3.3 | 24.3  |
| 21   |      |      |      |      | -3.7 | 24.3  |
| 21   |      |      |      |      | -3.4 | 24.3  |
| 20.5 |      |      |      |      | -2.7 | 24.3  |
| 20.5 |      |      |      |      | -3.2 | 24.3  |
| 20.5 |      |      |      |      | -2.8 | 24.3  |
| 21   |      |      |      |      | -3.7 | 24.3  |
| 29.5 | 31.4 | 27.2 | 29.9 | 28.6 | -2.5 | 27    |
| 30.5 |      |      |      |      | -4.9 | 27.3  |
| 30.5 |      |      |      |      | -1.6 | 27.4  |
| 30.5 |      |      |      |      | -4.8 | 27.7  |
| 31   |      |      |      |      | -3.7 | 28    |
| 30   |      |      |      |      | -5.2 | 28.3  |
| 30   |      |      |      |      | -1.9 | 29.6  |
| 31   |      |      |      |      | -5.1 | 29.7  |
| 29   | 30.5 | 28.6 | 28.4 | 28.5 | 0.4  | 24.18 |
| 29   |      |      |      |      | -0.3 | 24.29 |
| 28   |      |      |      |      | 0.1  | 24.31 |
| 29   |      |      |      |      | -0.7 | 24.34 |
| 29   |      |      |      |      | -0.4 | 24.37 |
| 29.5 |      |      |      |      | -0.8 | 24.36 |
| 26   |      |      |      |      | 2.2  | 24.43 |
| 29   |      |      |      |      | -1.2 | 24.66 |
| 27   | 32.8 | 29.0 | 29.0 | 29.0 | 2    | 23.2  |
| 28   |      |      |      |      | 1.2  | 23.2  |
| 29   |      |      |      |      | 0.1  | 23.6  |
| 30   |      |      |      |      | 0.4  | 23.7  |
| 28   |      |      |      |      | 0.3  | 24.2  |
| 29   |      |      |      |      | -0.2 | 24.2  |
| 28   |      |      |      |      | 2.5  | 24.2  |
| 29   |      |      |      |      | 1.1  | 25.6  |
| 30.5 | 33.6 | 27.5 | 29.7 | 28.6 | -2.4 | 21.1  |
| 30   |      |      |      |      | -1.9 | 21.5  |
| 30   |      |      |      |      | -3   | 21.8  |
| 30   |      |      |      |      | -5.7 | 21.8  |
| 29   |      |      |      |      | -2.5 | 22    |
| 28.5 |      |      |      |      | 1    | 22    |
| 29.5 |      |      |      |      | -2.3 | 22    |
| 29   |      |      |      |      | -2.1 | 22    |

|      |      |      |      |      |      |      |
|------|------|------|------|------|------|------|
| 30   | 33.5 | 28.4 | 30.0 | 29.2 | -1.5 | 30   |
| 30   |      |      |      |      | -1.5 | 32.7 |
| 30   |      |      |      |      | -2.6 | 33.5 |
| 30   |      |      |      |      | -3.1 | 34.6 |
| 30   |      |      |      |      | -1.2 | 35.5 |
| 29.5 |      |      |      |      | -1.3 | 37.4 |
| 30   |      |      |      |      | -0.8 | 38   |
| 30   |      |      |      |      | -1   | 38.2 |
| 30   | 31.2 | 29.0 | 30.1 | 29.6 | -0.5 | 24.2 |
| 30   |      |      |      |      | -1.8 | 24.7 |
| 30.5 |      |      |      |      | -1.9 | 26.1 |
| 30   |      |      |      |      | -0.5 | 27.4 |
| 30   |      |      |      |      | -1.3 | 28.6 |
| 30.5 |      |      |      |      | -2.2 | 28.6 |
| 30.5 |      |      |      |      | -2.4 | 28.6 |
| 30   |      |      |      |      | -0.7 | 28.6 |
| 30   |      |      |      |      | -1   | 28.6 |
| 30   |      |      |      |      | 0.4  | 28.6 |
| 30   |      |      |      |      | -0.8 | 28.6 |
| 30   | 33.1 | 30.8 | 29.6 | 30.2 | 0    | 22.1 |
| 30   |      |      |      |      | 0.7  | 23.4 |
| 30   |      |      |      |      | 1.5  | 23.4 |
| 29.5 |      |      |      |      | -0.6 | 23.7 |
| 29.5 |      |      |      |      | 1.7  | 23.7 |
| 29.5 |      |      |      |      | -0.3 | 23.7 |
| 29.5 |      |      |      |      | 2.5  | 23.7 |
| 29.5 |      |      |      |      | 0.3  | 23.7 |
| 29.5 |      |      |      |      | 2.5  | 23.7 |
| 29.5 |      |      |      |      | 1.4  | 23.7 |
| 29.5 |      |      |      |      | 3    | 23.7 |
| 30.5 |      |      |      |      | -0.3 | 23.7 |
| 30   | 34.3 | 29.7 | 30.0 | 29.9 | -0.6 | 22.1 |
| 30   |      |      |      |      | 0.1  | 22.4 |
| 30   |      |      |      |      | 0.6  | 23.1 |
| 30   |      |      |      |      | -0.2 | 23.5 |
| 30   |      |      |      |      | -0.6 | 23.9 |
| 30   |      |      |      |      | -1.8 | 24   |
| 30   |      |      |      |      | -1.1 | 24.7 |
| 29.5 |      |      |      |      | 1    | 24.7 |
| 31   |      |      |      |      | -1.3 | 24.7 |
| 31   |      |      |      |      | -0.9 | 24.7 |
| 29   |      |      |      |      | 0.9  | 24.7 |
| 30   |      |      |      |      | -0.1 | 23.5 |
| 30.5 | 29.0 | 30.5 | 30.5 | 30.5 | -0.9 | 26.5 |
| 30.5 |      |      |      |      | -0.5 | 26.6 |
| 30.5 |      |      |      |      | -1.3 | 26.6 |
| 31   |      |      |      |      | -0.4 | 27   |
| 30.5 |      |      |      |      | 0.7  | 27.1 |
| 30   |      |      |      |      | 2.3  | 27.1 |
| 30.5 |      |      |      |      | 0    | 27.8 |
| 30.5 |      |      |      |      | 0.4  | 27.8 |
| 30   |      |      |      |      | 0.9  | 27.8 |

|      |      |      |      |      |      |       |
|------|------|------|------|------|------|-------|
| 30.5 |      |      |      |      | -0.4 | 27.8  |
| 30.5 |      |      |      |      | -0.6 | 27.8  |
| 29.5 |      |      |      |      | 1    | 27.8  |
| 28   | 28.7 | 28.3 | 29.4 | 28.9 | 0.8  | 26.6  |
| 30   |      |      |      |      | -0.2 | 26.6  |
| 29.5 |      |      |      |      | -1.3 | 26.7  |
| 29   |      |      |      |      | -0.7 | 26.7  |
| 29.5 |      |      |      |      | -1.6 | 28    |
| 29   |      |      |      |      | -0.5 | 29.4  |
| 29.5 |      |      |      |      | -1.6 | 29.4  |
| 29.5 |      |      |      |      | -2.4 | 29.4  |
| 29.5 |      |      |      |      | -1.5 | 29.4  |
| 30   |      |      |      |      | -1   | 29.4  |
| 30   |      |      |      |      | -2   | 29.4  |
| 30   |      |      |      |      | -4   | 29.4  |
| 40   | 40.7 | 37.5 | 39.1 | 38.3 | -1.7 | 30    |
| 40   |      |      |      |      | -2.9 | 30    |
| 39.5 |      |      |      |      | -2.3 | 30    |
| 40   |      |      |      |      | -0.5 | 30    |
| 40   |      |      |      |      | -1.5 | 30    |
| 40   |      |      |      |      | -0.3 | 30    |
| 39.5 |      |      |      |      | -4   | 30    |
| 40   |      |      |      |      | -2.9 | 30    |
| 39   |      |      |      |      | 1.1  | 13.53 |
| 37   |      |      |      |      | -2.1 | 13.53 |
| 35   |      |      |      |      | -0.2 | 13.53 |
| 39   | 40.3 | 38.0 | 38.8 | 38.4 | -1.1 | 13.53 |
| 39.5 |      |      |      |      | -4.4 | 13.53 |
| 36   |      |      |      |      | -4.3 | 13.53 |
| 39   |      |      |      |      | -1.5 | 13.53 |
| 40   |      |      |      |      | 1.8  | 35.8  |
| 40   |      |      |      |      | 1    | 35.8  |
| 40   |      |      |      |      | 0.1  | 35.8  |
| 40   |      |      |      |      | -0.1 | 35.8  |
| 39   |      |      |      |      | -0.7 | 35.8  |
| 39   |      |      |      |      | -1   | 35.8  |
| 35   |      |      |      |      | 2    | 35.8  |
| 39.5 | 39.8 | 38.8 | 39.4 | 39.1 | -1.3 |       |
| 40   |      |      |      |      | -0.8 | 27.2  |
| 39   |      |      |      |      | -0.4 | 27.2  |
| 40   |      |      |      |      | 0.2  | 27.2  |
| 40   |      |      |      |      | -1.1 | 27.2  |
| 40   |      |      |      |      | -1.8 | 27.2  |
| 40   |      |      |      |      | -0.9 | 27.2  |
| 40   |      |      |      |      | -1.1 | 27.2  |
| 35   | 40.5 | 39.7 | 39.4 | 39.5 | 1    | 35.8  |
| 40   |      |      |      |      | -1.9 | 27.2  |
| 40   | 40.9 | 39.4 | 39.7 | 39.5 | 1.5  | 26.4  |
| 40   |      |      |      |      | 0.9  | 26.4  |
| 40   |      |      |      |      | 0.2  | 28.2  |
| 40   |      |      |      |      | 1.3  | 28.7  |
| 40   |      |      |      |      | 2.1  | 28.7  |

|      |      |      |      |      |      |      |
|------|------|------|------|------|------|------|
| 40   |      |      |      |      | 2.9  | 28.7 |
| 40   |      |      |      |      | -2.9 | 28.7 |
| 40   |      |      |      |      | -2.8 | 28.7 |
| 38.5 | 39.7 | 35.2 | 36.4 | 35.8 | 0.5  | 26.6 |
| 39   |      |      |      |      | -3.1 | 26.6 |
| 39   |      |      |      |      | -3.7 | 26.6 |
| 36   |      |      |      |      | -1.8 | 26.6 |
| 33.9 |      |      |      |      | 0.1  | 26.6 |
| 35   |      |      |      |      | -0.3 | 26.6 |
| 35.5 |      |      |      |      | -0.7 | 26.6 |
| 35   |      |      |      |      | 1.1  | 26.6 |
| 35   |      |      |      |      | -0.3 | 26.6 |
| 35   |      |      |      |      | -0.3 | 26.6 |
| 38.5 |      |      |      |      | -4.2 |      |
| 40   | 42.3 | 36.9 | 37.6 | 37.3 | 2    | 24.8 |
| 37   |      |      |      |      | 5    | 24.8 |
| 40   |      |      |      |      | -3.1 | 24.8 |
| 40   |      |      |      |      | -5.4 | 24.8 |
| 40   |      |      |      |      | -4.8 | 24.8 |
| 40   |      |      |      |      | -8.2 | 24.8 |
| 40   |      |      |      |      | -3.5 |      |
| 33   | 41.5 | 37.9 | 35.7 | 36.8 | -0.3 | 22.7 |
| 38   |      |      |      |      | 0.3  | 22.7 |
| 34   |      |      |      |      | 1.7  | 22.7 |
| 32   |      |      |      |      | 7.8  | 22.7 |
| 31   |      |      |      |      | 6.3  | 22.7 |
| 36   |      |      |      |      | 2.8  | 22.7 |
| 38   |      |      |      |      | -0.1 | 22.7 |
| 37   |      |      |      |      | 3.1  | 22.7 |
| 37   |      |      |      |      | -0.1 | 22.7 |
| 40   |      |      |      |      | 0.2  | 22.7 |
| 37   |      |      |      |      | 2.2  | 22.7 |
| 38   |      |      |      |      | 0.4  | 22.7 |
| 40   | 43.5 | 37.2 | 35.9 | 36.6 | -1.3 | 24.3 |
| 40   |      |      |      |      | 1.5  | 24.3 |
| 35   |      |      |      |      | -0.4 | 24.3 |
| 35   |      |      |      |      | -3.6 | 25.6 |
| 37   |      |      |      |      | -0.3 | 25.6 |
| 37   |      |      |      |      | 0.2  | 25.6 |
| 37   |      |      |      |      | 0.6  | 26   |
| 35   |      |      |      |      | 2.4  | 26   |
| 35   |      |      |      |      | 4.7  | 26   |
| 36   |      |      |      |      | 3.1  | 26   |
| 28   |      |      |      |      | 7.5  | 26   |
| 34   |      |      |      |      | 2.1  | 26   |
| 39   | 45.5 | 38.2 | 37.5 | 37.8 | 2.2  | 22.6 |
| 39   |      |      |      |      | 2.4  | 22.7 |
| 39   |      |      |      |      | -0.1 | 22.7 |
| 39   |      |      |      |      | -0.2 | 22.7 |
| 36   |      |      |      |      | 0    | 22.7 |
| 38   |      |      |      |      | -1.9 | 22.7 |
| 37   |      |      |      |      | -0.6 | 22.7 |

|      |      |      |      |      |       |       |
|------|------|------|------|------|-------|-------|
| 37   |      |      |      |      | 2.1   | 22.7  |
| 36   |      |      |      |      | 0.8   | 22.7  |
| 37   |      |      |      |      | 2.2   | 22.7  |
| 35   |      |      |      |      | 0.9   | 22.7  |
| 36   |      |      |      |      | 2.8   |       |
| 25.5 | 10.2 | 6.2  | 24.3 | 15.3 | -21   | 57    |
| 25.5 |      |      |      |      | -21.9 | 71.5  |
| 25   |      |      |      |      | -17.1 | 74.5  |
| 25.5 |      |      |      |      | -18.6 | 76.6  |
| 22.5 |      |      |      |      | -15.2 | 85.1  |
| 22   |      |      |      |      | -15.1 | 80.8  |
|      |      |      |      |      | 0     |       |
| 20   | 10.5 | 5.8  | 21.6 | 13.7 | -13.3 | 152.9 |
| 20   |      |      |      |      | -13.7 | 154.8 |
| 21   |      |      |      |      | -15.8 | 154.9 |
| 24   |      |      |      |      | -18.5 | 163.4 |
| 23   |      |      |      |      | -17.6 | 167   |
| 21.5 |      |      |      |      | -15.7 | 175.2 |
| 20   | 14.8 | 17.9 | 19.7 | 18.8 | -2.6  | 124.1 |
| 20   |      |      |      |      | -1.9  | 125.9 |
| 20   |      |      |      |      | -3.5  | 126.7 |
| 20   |      |      |      |      | -2.7  | 127.3 |
| 18   |      |      |      |      | 0.8   | 130.2 |
| 20   |      |      |      |      | -1    | 128.9 |
| 18   |      |      |      |      | 4.1   | 44.4  |
| 19   | 16.8 | 22.7 | 19.9 | 21.3 | 1     | 37.1  |
| 18   |      |      |      |      | 7.2   | 49.2  |
| 19.5 |      |      |      |      | 5.1   | 37.3  |
| 19   |      |      |      |      | 4.2   | 39.1  |
| 19.5 |      |      |      |      | 3.5   | 39.6  |
| 24.5 | 11.9 | 20.4 | 23.9 | 22.1 | -4.5  | 34.4  |
| 23.5 |      |      |      |      | -3.3  | 36.4  |
| 24   |      |      |      |      | -3.9  | 36.4  |
| 24.5 |      |      |      |      | -3.5  | 36.4  |
| 23.5 |      |      |      |      | -3.2  | 36.4  |
| 24   |      |      |      |      | -4.3  | 36.4  |
| 23.5 |      |      |      |      | -3.6  | 36.4  |
| 23.5 |      |      |      |      | -1.7  | 36.4  |
| 21   | 15.6 | 20.7 | 21.4 | 21.0 | -1    | 25.5  |
| 22.5 |      |      |      |      | -1.4  | 27.2  |
| 22   |      |      |      |      | -1.8  | 27.3  |
| 21.5 |      |      |      |      | 0     | 27.3  |
| 21   |      |      |      |      | -0.7  | 31.4  |
| 21   |      |      |      |      | -0.7  | 28.8  |
| 21.5 |      |      |      |      | 0.1   | 28.5  |
| 21.5 |      |      |      |      | -0.9  | 30.2  |
| 21.5 |      |      |      |      | -0.1  | 40.2  |
| 21   |      |      |      |      | -0.4  | 41.7  |
| 21   |      |      |      |      | -0.3  | 45.7  |
| 21   |      |      |      |      | -0.9  | 49.1  |
| 20   | 12.5 | 20.0 | 20.1 | 20.0 | -0.3  | 31.8  |
| 20   |      |      |      |      | -1.5  | 31.8  |

|      |      |      |      |      |      |      |
|------|------|------|------|------|------|------|
| 20.5 |      |      |      |      | -0.6 | 32.2 |
| 22   |      |      |      |      | -1.2 | 32.2 |
| 20   |      |      |      |      | 1    | 32.2 |
| 20   |      |      |      |      | 0.1  | 32.2 |
| 20   |      |      |      |      | 0.8  | 32.2 |
| 20   |      |      |      |      | -0.4 | 32.2 |
| 20   |      |      |      |      | 0.5  | 32.2 |
| 20   |      |      |      |      | -0.4 | 32.2 |
| 19   |      |      |      |      | 0    | 32.2 |
| 20   |      |      |      |      | 0    | 32.2 |
|      |      |      |      |      | 0    |      |
| 20   | 22.5 | 20.2 | 20.2 | 20.2 | 0.3  | 31.2 |
| 20.5 |      |      |      |      | 0.6  | 32.9 |
| 20.5 |      |      |      |      | 0.4  | 32.9 |
| 20   |      |      |      |      | 0.1  | 32.9 |
| 20   |      |      |      |      | 1.8  | 32.9 |
| 20   |      |      |      |      | -0.5 | 32.9 |
| 20.5 |      |      |      |      | -0.9 | 32.9 |
| 20   |      |      |      |      | 0.5  | 32.9 |
| 20   |      |      |      |      | -0.4 | 32.9 |
| 20   |      |      |      |      | -0.4 | 32.9 |
| 20   |      |      |      |      | -0.1 | 32.9 |
| 20.5 | 21.5 | 20.2 | 20.4 | 20.3 | -0.5 | 26.4 |
| 20   |      |      |      |      | 0    | 26.6 |
| 20   |      |      |      |      | 0    | 26.6 |
| 20   |      |      |      |      | 0    | 27.5 |
| 21   |      |      |      |      | -0.9 | 27.5 |
| 21   |      |      |      |      | -1.5 | 27.5 |
| 20   |      |      |      |      | 0.4  | 27.5 |
| 20   |      |      |      |      | -0.2 | 27.5 |
| 21   |      |      |      |      | -0.8 | 27.5 |
| 20   |      |      |      |      | 1.2  | 27.5 |
| 20.5 |      |      |      |      | 0.6  | 27.5 |
| 30   | 30.6 | 26.4 | 30.5 | 28.4 | -4.8 | 32.6 |
| 30.5 |      |      |      |      | -5.2 | 32.6 |
| 31   |      |      |      |      | -5.9 | 32.6 |
| 30.5 |      |      |      |      | -7   | 32.6 |
| 31   |      |      |      |      | -7.1 | 32.6 |
| 31   |      |      |      |      | -5.6 | 32.6 |
| 31   |      |      |      |      | -5.4 | 32.6 |
| 30.5 |      |      |      |      | -6.1 | 32.6 |
| 29.5 |      |      |      |      | -3.5 | 36   |
| 30   |      |      |      |      | 3    | 36   |
| 30   |      |      |      |      | 3    | 36   |
| 30   |      |      |      |      | 3    | 36   |
| 29.5 |      |      |      |      | 4.1  | 36   |
| 30   |      |      |      |      | -0.7 | 36   |
| 30   |      |      |      |      | -4   | 36   |
| 30   | 32.4 | 30.0 | 31.6 | 30.8 | -5   | 36   |
| 38.5 |      |      |      |      | -8.2 | 69.8 |
| 30.5 |      |      |      |      | -2.9 | 66.5 |
| 32   |      |      |      |      | -3.5 | 69.8 |



|      |      |      |      |      |      |      |
|------|------|------|------|------|------|------|
| 33   |      |      |      |      | 2.5  | 69.8 |
| 31   |      |      |      |      | -0.7 | 67.3 |
| 30.5 |      |      |      |      | 0.6  | 66.5 |
| 31   | 20.8 | 30.8 | 29.1 | 29.9 | -1   | 50.2 |
| 31   |      |      |      |      | -1   | 66.5 |
| 30   | 18.1 | 31.0 | 27.5 | 29.3 | 1.5  | 22   |
| 30   |      |      |      |      | 0.4  | 22   |
| 30   |      |      |      |      | 0.4  | 22.2 |
| 30.5 |      |      |      |      | 0.9  | 22.2 |
| 31   |      |      |      |      | 1.1  | 22.2 |
| 30   |      |      |      |      | 0    | 22.2 |
| 30   |      |      |      |      | 0.8  | 22.2 |
| 30   |      |      |      |      | 2    | 22.2 |
| 17   | 21.8 | 30.7 | 21.6 | 26.2 | 12.7 | 33.3 |
| 22   |      |      |      |      | 10.7 | 33.3 |
| 22   |      |      |      |      | 8.2  | 35.7 |
| 21   |      |      |      |      | 9.3  | 36.3 |
| 23   |      |      |      |      | 6.3  | 36.3 |
| 24   |      |      |      |      | 8.7  | 36.3 |
| 22   |      |      |      |      | 9.5  | 36.3 |
| 22   |      |      |      |      | 7.5  | 36.3 |

| IAP TV press(mmHg) | Mean IAP TP | Mean IAP TG | Mean IAP TV | IAP mean | IAP bias | Urine (ml) |
|--------------------|-------------|-------------|-------------|----------|----------|------------|
|--------------------|-------------|-------------|-------------|----------|----------|------------|

| APP | APP checked | PCO2(Kpa) | PCO2(mmHg) | PO2(Kpa) | PO2(mmHg) | BEecf(mmol/L) | HCO3(mmol/L) |
|-----|-------------|-----------|------------|----------|-----------|---------------|--------------|
| 50  | 50          | 5.2       | 39.00      | 47.2     | 354.03    | 6             | 28.9         |
| 49  | 49          | 5.2       | 39.00      | 56       | 420.03    | 4             | 30.6         |
| 51  | 51          | 5.1       | 38.25      | 47.6     | 357.03    | 6             | 32.5         |
| 51  | 51          | 6.8       | 51.00      | 56.4     | 423.03    | 5             | 32.5         |
| 47  | 47          | 7.6       | 57.00      | 50.1     | 375.78    | 3             | 33.4         |
| 52  | 52          | 7.6       | 57.00      | 50.1     | 375.78    | 4             | 33.4         |
| 55  | 55          | 7.3       | 54.75      | 52.1     | 390.78    | 3             | 32           |
| 57  | 57          | 6.31      | 47.33      | 33.5     | 251.27    | 1             | 26.7         |
| 58  | 58          | 5.53      | 41.48      | 33.1     | 248.27    | -1            | 24           |
| 62  | 62          | 6.08      | 45.60      | 38.6     | 289.52    | 2             | 27           |
| 64  | 64          | 5.73      | 42.98      | 30.3     | 227.27    | 3             | 27.8         |
| 78  | 78          | 5.79      | 43.43      | 26.7     | 200.27    | 3             | 27.6         |
| 62  | 62          | 6.1       | 45.75      | 34.7     | 260.27    | 4             | 28.5         |
| 96  | 96          | 6.27      | 47.03      | 25.7     | 192.77    | 2             | 26.9         |
| 67  | 67          | 5.58      | 41.85      | 45.2     | 339.03    | 6             | 30.2         |
| 59  | 59          | 5.41      | 40.58      | 49.4     | 370.53    | 5             | 29.1         |
| 70  | 70          | 5.02      | 37.65      | 42.2     | 316.53    | 4             | 27.7         |
| 60  | 60          | 5.63      | 42.23      | 45.8     | 343.53    | 5             | 28.9         |
| 53  | 53          | 5.47      | 41.03      | 44.8     | 336.03    | 4             | 28.5         |
| 70  | 70          | 4.57      | 34.28      | 38.9     | 291.77    | 2             | 25.2         |
| 65  | 65          | 4.74      | 35.55      | 31.9     | 239.27    | 1             | 25.1         |
| 52  | 52          | 5.24      | 39.30      | 48.4     | 363.03    | 3             | 26.8         |
| 54  | 54          | 4.97      | 37.28      | 49.7     | 372.78    | 2             | 26.1         |
| 59  | 59          | 5         | 37.50      | 51.6     | 387.03    | 3             | 26.6         |
| 60  | 60          | 5.28      | 39.60      | 51.2     | 384.03    | 3             | 27.4         |
| 55  | 55          | 5.32      | 39.90      | 48       | 360.03    | 3             | 27.3         |
| 52  | 52          | 5.67      | 42.53      | 47.4     | 355.53    | 4             | 28.5         |
| 48  | 48          | 5.07      | 38.03      | 46.8     | 351.03    | 3             | 26.9         |
| 84  | 84          | 5.54      | 41.55      | 43.1     | 323.28    | 7             | 30.7         |
| 82  | 82          | 5.83      | 43.73      | 43.9     | 329.28    | 8             | 31.5         |
| 82  | 82          | 5.69      | 42.68      | 47.4     | 355.53    | 8             | 31.5         |
| 81  | 81          | 5.65      | 42.38      | 51.8     | 388.53    | 8             | 31.4         |
| 78  | 78          | 5.69      | 42.68      | 48.8     | 366.03    | 7             | 30.9         |
| 69  | 69          | 5.93      | 44.48      | 57.4     | 430.54    | 8             | 31.8         |
| 72  | 72          | 5.71      | 42.83      | 48.5     | 363.78    | 8             | 31.7         |
| 51  | 51          | 6.37      | 47.78      | 49.5     | 371.28    | 4             | 29.1         |
| 53  | 53          | 6.75      | 50.63      | 56.45    | 423.41    | 4.6           | 29.4         |
| 53  | 53          | 6.6       | 49.50      | 45       | 337.53    | 0             | 25.3         |
| 49  | 49          | 7.46      | 55.95      | 57.7     | 432.79    | -0.4          | 25.6         |
| 47  | 47          | 8.13      | 60.98      | 53.2     | 399.03    | 1.6           | 27.6         |
| 42  | 42          | 8.4       | 63.01      | 46.9     | 351.78    | 3             | 29.6         |
| 38  | 38          | 8.64      | 64.81      | 41.8     | 313.53    | 3             | 29.9         |
| 42  | 42          | 5.77      | 43.28      | 37       | 277.52    | 5             | 29.5         |
| 45  | 45          | 6.81      | 51.08      | 61.6     | 462.04    | 6             | 30.8         |
| 39  | 39          | 6.92      | 51.90      | 62.1     | 465.79    | 7             | 31.7         |
| 36  | 36          | 6.74      | 50.55      | 65.2     | 489.04    | 6             | 31.1         |
| 35  | 35          | 6.77      | 50.78      | 64.5     | 483.79    | 6             | 30.7         |
| 31  | 31          | 6.89      | 51.68      | 49       | 367.53    | 6             | 31.1         |
| 27  | 27          | 7.45      | 55.88      | 52.62    | 394.68    | 7             | 32.4         |
| 47  | 47          | 6.96      | 52.20      | 41.7     | 312.78    | 3             | 29           |
| 48  | 48          | 7.61      | 57.08      | 47.6     | 357.03    | 6             | 31.5         |

|    |    |       |       |       |        |     |      |
|----|----|-------|-------|-------|--------|-----|------|
| 47 | 47 | 7.76  | 58.20 | 47.2  | 354.03 | 7   | 32.9 |
| 41 | 41 | 7.85  | 58.88 | 52    | 390.03 | 7   | 32.3 |
| 36 | 36 | 7.9   | 59.25 | 47.2  | 354.03 | 6   | 32.2 |
| 35 | 35 | 8.32  | 62.41 | 52.8  | 396.03 | 6   | 32.5 |
| 35 | 35 | 8.09  | 60.68 | 49.3  | 369.78 | 6   | 32.1 |
| 33 | 33 | 6.5   | 48.75 | 60.9  | 456.79 | 4.7 | 29.4 |
| 33 | 33 | 5.8   | 43.50 | 58.4  | 438.04 | 2.7 | 27   |
| 35 | 36 | 5.8   | 43.50 | 51.7  | 387.78 | 3.2 | 27.4 |
| 26 | 26 | 6.13  | 45.98 | 64.1  | 480.79 | 3.7 | 28.1 |
| 22 | 22 | 6     | 45.00 | 68.5  | 513.79 | 3.1 | 27.5 |
| 20 | 20 | 6.4   | 48.00 | 59.3  | 444.79 | 5   | 29.5 |
| 27 | 27 | 6.53  | 48.98 | 61.6  | 462.04 | 6.8 | 31.4 |
| 29 | 29 | 7.33  | 54.98 | 60.1  | 450.79 | 2.6 | 28   |
| 28 | 28 | 7.4   | 55.50 | 60    | 450.04 | 4.5 | 30.1 |
| 43 | 43 | 6.26  | 46.95 | 58.4  | 438.04 | 4   | 28.5 |
| 45 | 45 | 6.8   | 51.00 | 65.6  | 492.04 | 3.9 | 28.8 |
| 29 | 29 | 6.8   | 51.00 | 64    | 480.04 | 3   | 28   |
| 43 | 43 | 6.8   | 51.00 | 58.2  | 436.54 | 4   | 28.5 |
| 34 | 34 | 7.14  | 53.55 | 59.1  | 443.29 | 5   | 30.1 |
| 27 | 27 | 6.8   | 51.00 | 67.2  | 504.04 | 6   | 31.1 |
| 27 | 27 | 5.86  | 43.95 | 60.1  | 450.79 | 2   | 26.9 |
| 26 | 26 | 7.3   | 54.75 | 82.9  | 621.80 | 7   | 32.3 |
| 24 | 24 | 7.02  | 52.65 | 73    | 547.55 | 6   | 31.5 |
| 21 | 21 | 7     | 52.50 | 72    | 540.04 | 6   | 31.2 |
| 19 | 19 | 6.17  | 46.28 | 69.46 | 520.99 | 6   | 30.8 |
| 15 | 15 | 6.32  | 47.40 | 82.26 | 617.00 | 7   | 31.6 |
| 18 | 18 | 6.34  | 47.55 | 76.4  | 573.05 | 7   | 31.6 |
| 12 | 12 | 6.08  | 45.60 | 81.4  | 610.55 | 8   | 31.5 |
| 11 | 11 | 5.25  | 39.38 |       | 411.78 | 4   | 28.2 |
| 9  | 9  | 4.88  | 36.60 | 77.7  | 582.80 | 5   | 28   |
| 23 | 23 | 6.94  | 52.05 | 85.6  | 642.05 | 8   | 32.4 |
| 20 | 20 | 6.41  | 48.08 | 80.8  | 606.05 | 6   | 30.3 |
| 18 | 18 | 6.5   | 48.75 | 76.9  | 576.80 | 4   | 29.4 |
| 17 | 17 | 6.65  | 49.88 | 79.7  | 597.80 | 3   | 28.6 |
| 18 | 18 | 5.96  | 44.70 | 76.5  | 573.80 | 3   | 28.1 |
| 12 | 12 | 5.41  | 40.58 | 79.4  | 595.55 | 3   | 26.9 |
| 10 | 10 | 4.89  | 36.68 | 79.2  | 594.05 | 1   | 25.3 |
| 27 | 27 | 7.17  | 53.78 | 74.6  | 559.55 | 7   | 31.8 |
| 31 | 31 | 8.04  | 60.30 | 66.9  | 501.79 | 6   | 31.9 |
| 35 | 35 | 8.8   | 66.01 |       | 405.78 | 7   | 33.5 |
| 27 | 27 | 8.41  | 63.08 | 63.4  | 475.54 | 6   | 32.1 |
| 24 | 24 | 8.97  | 67.28 | 62.9  | 471.79 | 5   | 31.8 |
| 20 | 20 | 9.41  | 70.58 | 62.5  | 468.79 | 7   | 33.5 |
| 15 | 15 | 10.24 | 76.81 | 66.4  | 498.04 | 6   | 33.4 |
| 18 | 18 | 9.8   | 73.51 | 62.6  | 469.54 | 7   | 34.2 |
| 18 | 18 | 10.36 | 77.71 | 61.8  | 463.54 | 6   | 33.4 |
| 17 | 17 | 9.98  | 74.86 | 67.3  | 504.79 | 7   | 33.7 |
| 17 | 17 |       | 85.06 | 60.9  | 456.79 | 7   | 34.5 |
| 31 | 31 | 6.12  | 45.90 | 48    | 360.03 | 7   | 30.9 |
| 22 | 22 | 5.8   | 43.50 | 62.1  | 465.79 | 6   | 30.2 |
| 21 | 21 | 5.69  | 42.68 | 52.2  | 391.53 | 6   | 30.1 |

|    |    |      |       |       |        |    |      |
|----|----|------|-------|-------|--------|----|------|
| 19 | 19 | 5.5  | 41.25 | 64.8  | 486.04 | 6  | 29.8 |
| 15 | 15 | 5.44 | 40.80 | 72    | 540.04 | 8  | 31.3 |
| 14 | 14 | 5.24 | 39.30 |       | 394.53 | 6  | 29.8 |
| 15 | 13 | 5.32 | 39.90 | 70.8  | 531.04 | 6  | 29.5 |
| 13 | 14 | 5.17 | 38.78 | 70.1  | 525.79 | 4  | 27.9 |
| 15 | 13 | 5.36 | 40.20 | 73    | 547.55 | 4  | 28.2 |
| 13 | 12 | 5.21 | 39.08 | 68.5  | 513.79 | 2  | 26.6 |
| 14 | 13 | 5.6  | 42.00 | 72    | 540.04 | 2  | 26.6 |
| 13 | 13 | 5.37 | 40.28 | 68.1  | 510.79 | -1 | 24.2 |
| 22 | 22 | 7.34 | 55.05 | 55.3  | 414.78 | 8  | 32.7 |
| 15 | 15 | 7.28 | 54.60 | 68.2  | 511.54 | 7  | 32.3 |
| 19 | 19 | 7.1  | 53.25 | 61.2  | 459.04 | 7  | 32.2 |
| 18 | 18 | 7.08 | 53.10 | 65.4  | 490.54 | 6  | 31.4 |
| 16 | 16 | 6.74 | 50.55 |       | 354.78 | 5  | 30.2 |
| 17 | 17 | 7.37 | 55.28 | 63.6  | 477.04 | 6  | 31.7 |
| 16 | 16 | 7.34 | 55.05 | 64.9  | 486.79 | 7  | 32.4 |
| 12 | 12 | 8.04 | 60.30 | 51.2  | 384.03 | 7  | 32.7 |
| 13 | 13 | 7.37 | 55.28 | 62.1  | 465.79 | 6  | 31.5 |
| 12 | 12 | 7.46 | 55.95 | 61.3  | 459.79 | 6  | 31.2 |
| 11 | 11 | 7.65 | 57.38 | 54.4  | 408.03 | 6  | 31.9 |
| 23 | 23 | 7.24 | 54.30 | 72.5  | 543.79 | 7  | 32.1 |
| 19 | 19 | 7.24 | 54.30 | 72.5  | 543.79 | 7  | 32.1 |
| 13 | 13 | 7.53 | 56.48 | 62.5  | 468.79 | 6  | 31.7 |
| 13 | 13 | 7.53 | 56.48 | 78.5  | 588.80 | 6  | 31.1 |
| 13 | 13 | 7.69 | 57.68 | 79.7  | 597.80 | 6  | 31.9 |
| 12 | 12 | 7.84 | 58.80 | 80.53 | 604.02 | 5  | 31.2 |
| 13 | 13 | 6.98 | 52.35 | 80    | 600.05 | 3  | 29   |
| 11 | 11 | 6.08 | 45.60 | 77.7  | 582.80 | 3  | 27.5 |
| 24 | 24 | 6.48 | 48.60 | 54.4  | 408.03 | 6  | 30.3 |
| 23 | 23 | 6.8  | 51.00 | 65.3  | 489.79 | 6  | 30.7 |
| 22 | 22 | 7.2  | 54.00 | 67.2  | 504.04 | 4  | 29.8 |
| 21 | 21 | 7.52 | 56.40 | 71    | 532.54 | 5  | 30.9 |
| 22 | 22 | 7.82 | 58.65 | 68.8  | 516.04 | 4  | 29.8 |
| 21 | 21 | 7.94 | 59.55 | 75.2  | 564.05 | 5  | 30.9 |
| 18 | 18 | 8    | 60.00 | 76.6  | 574.55 | 2  | 28.4 |
| 16 | 16 | 8.28 | 62.11 | 73.4  | 550.55 | 3  | 29.6 |
| 18 | 18 | 5.2  | 39.00 | 75.6  | 567.05 | 10 | 32.4 |
| 17 | 17 | 6.95 | 52.13 |       |        |    |      |
| 19 | 19 | 6.16 | 46.20 | 73.3  | 549.80 | 8  | 31.7 |
| 17 | 17 | 7.51 | 56.33 |       |        |    |      |
| 15 | 15 | 6.42 | 48.15 | 77    | 577.55 | 7  | 31.6 |
| 13 | 13 | 7.19 | 53.93 |       |        |    |      |
| 12 | 12 | 6.64 | 49.80 | 78.2  | 586.55 | 5  | 30.2 |
| 12 | 12 | 6.84 | 51.30 |       |        |    |      |
| 7  | 7  | 6.9  | 51.75 | 29.3  | 219.77 | 4  | 29.6 |
| 96 | 96 | 6.95 | 52.13 |       |        |    |      |
| 17 | 17 | 8.93 | 66.98 | 28.4  | 213.02 | 3  | 29.8 |
| 27 | 27 | 8.52 | 63.91 | 46.93 | 352.00 | 1  | 28.4 |
| 27 | 27 | 7.76 | 58.20 | 39.6  | 297.02 | -1 | 26.2 |
| 1  | 1  | 6.3  | 47.25 | 50    | 375.03 | 0  | 25.6 |
| 2  | 3  | 6.18 | 46.35 | 60.26 | 451.99 | -2 | 24.1 |
| 1  | 1  | 6.08 | 45.60 | 63.6  | 477.04 | -2 | 23.9 |

|    |    |      |       |       |        |     |      |
|----|----|------|-------|-------|--------|-----|------|
| 32 | 36 | 6.53 | 48.98 | 65.2  | 489.04 | 6   | 30.5 |
| 32 | 32 | 6.82 | 51.15 | 71.46 | 535.99 | 6   | 30.7 |
| 31 | 22 | 6.18 | 46.35 |       | 382.01 | 5   | 29.6 |
| 34 | 15 | 6.48 | 48.60 | 68.66 | 514.99 | 5   | 30.1 |
| 36 | 14 | 6.89 | 51.68 | 68.4  | 513.04 | 6   | 30.9 |
| 35 | 12 | 6.8  | 51.00 | 66.4  | 498.04 | 5   | 29.8 |
| 11 | 11 | 6.76 | 50.70 | 69.3  | 519.79 | 4   | 29.4 |
| 8  | 8  | 6.93 | 51.98 | 74.2  | 556.55 | 4   | 29.3 |
| 18 | 18 | 6.13 | 45.98 | 64.6  | 484.54 | 7   | 30.8 |
| 26 | 26 | 6.78 | 50.85 | 49.7  | 372.78 | 6   | 30.7 |
| 31 | 31 | 7.93 | 59.48 | 48    | 360.03 | 5   | 31.4 |
| 20 | 20 | 8.05 | 60.38 | 46.2  | 346.53 | 5   | 30.9 |
| 20 | 20 | 7.73 | 57.98 | 46.5  | 348.78 | 3   | 29.5 |
| 13 | 13 | 7.24 | 54.30 | 43.8  | 328.53 | 3   | 28.8 |
| 14 | 14 | 7.73 | 57.98 | 46.8  | 351.03 | 3   | 29.5 |
| 12 | 12 | 7.16 | 53.70 | 51.4  | 385.53 | 1   | 27.1 |
| 10 | 10 | 6.82 | 51.15 | 45.3  | 339.78 | -1  | 25.5 |
| 11 | 11 | 6.89 | 51.68 | 46    | 345.03 | -2  | 24.7 |
| 6  | 6  | 6.85 | 51.38 | 42.2  | 316.53 | -5  | 22.3 |
| 12 | 12 | 5.68 | 42.60 | 76.4  | 573.05 | 7   | 31   |
| 13 | 13 | 6.5  | 48.75 | 73    | 547.55 | 7   | 31.2 |
| 11 | 11 | 6.74 | 50.55 | 74    | 555.05 | 5   | 29.9 |
| 12 | 12 | 7.34 | 55.05 | 78    | 585.05 | 3   | 29.1 |
| 8  | 8  | 7.18 | 53.85 | 75.7  | 567.80 | 1   | 27.1 |
| 9  | 9  | 6.08 | 45.60 | 65.7  | 492.79 | -3  | 23.3 |
| 9  | 9  | 6.32 | 47.40 | 84    | 630.05 | -2  | 24.3 |
| 7  | 7  | 6.61 | 49.58 | 83.8  | 628.55 | -4  | 23   |
| 8  | 8  | 6.61 | 49.58 | 85.2  | 639.05 | -6  | 21.2 |
| 6  | 6  | 5.89 | 44.18 | 75.4  | 565.55 | -9  | 18.7 |
| 4  | 4  | 4.92 | 36.90 | 77.2  | 579.05 | -11 | 16.2 |
| 0  | 0  | 4.84 | 36.30 | 81.7  | 612.80 | -11 | 16   |
| 18 | 18 | 4.62 | 34.65 | 67    | 502.54 | -4  | 21   |
| 16 | 16 | 5.64 | 42.30 | 75.2  | 564.05 | 0   | 24.7 |
| 12 | 12 | 5.44 | 40.80 | 73.7  | 552.80 | -1  | 24.4 |
| 10 | 10 | 5.7  | 42.75 | 80.1  | 600.80 | -1  | 24.7 |
| 28 | 28 | 6.8  | 51.00 | 81.4  | 610.55 | -3  | 24.1 |
| 15 | 15 | 7.24 | 54.30 | 75.4  | 565.55 | -7  | 21.3 |
| 6  | 6  |      | 42.68 | 78.2  | 586.55 | -8  | 18.8 |
| 7  | 7  | 6.1  | 45.75 | 80    | 600.05 | -9  | 18.5 |
| 4  | 4  | 5.65 | 42.38 | 74.9  | 561.80 | -10 | 17.9 |
| 2  | 2  | 5.62 | 42.15 | 80.5  | 603.80 | -10 | 17.8 |
| -3 | -3 | 5.64 | 42.30 |       | 373.53 | -10 | 17.6 |
| 11 | 11 | 6.2  | 46.50 | 78.4  | 588.05 | -1  | 24.5 |
| 24 | 24 | 5.52 | 41.40 | 63.7  | 477.79 | 6   | 30   |
| 19 | 19 | 6.01 | 45.08 | 65.7  | 492.79 | 5   | 29.4 |
| 23 | 23 | 6.14 | 46.05 | 66.8  | 501.04 | 5   | 29.2 |
| 18 | 18 | 5.93 | 44.48 | 75.7  | 567.80 | 5   | 29.3 |
| 19 | 19 | 5.37 | 40.28 | 64.5  | 483.79 | 2   | 26.3 |
| 15 | 15 | 5.74 | 43.05 | 64.2  | 481.54 | 3   | 27.6 |
| 9  | 9  | 4.56 | 34.20 | 70.4  | 528.04 | 3   | 26.1 |
| 6  | 6  | 3.78 | 28.35 | 77.33 | 580.02 | -1  | 22.4 |
| 8  | 8  | 4.17 | 31.28 | 69.7  | 522.79 | -5  | 20.1 |

|     |    |      |       |       |        |       |      |
|-----|----|------|-------|-------|--------|-------|------|
| 35  | 35 |      | 52.95 | 76.5  | 573.80 | -7    | 20.6 |
| 4   | 4  | 4.17 | 31.28 | 68.1  | 510.79 | -9    | 16.9 |
| 11  | 11 | 4.54 | 34.05 |       | 390.03 | -12   | 15.2 |
| 29  | 29 | 5.54 | 41.55 | 69.3  | 519.79 | 4     | 28.3 |
| 16  | 16 | 5.7  | 42.75 | 71    | 532.54 | 3     | 27.6 |
| 12  | 12 | 6.84 | 51.30 | 78.8  | 591.05 | 7     | 31.8 |
| 12  | 12 | 5.85 | 43.88 | 65.7  | 492.79 | 1     | 26.1 |
| 16  | 16 | 5.46 | 40.95 | 65.6  | 492.04 | -2    | 23.7 |
| 10  | 10 | 5.41 | 40.58 | 77.2  | 579.05 | -2    | 23.2 |
| 13  | 13 | 5.76 | 43.20 | 78    | 585.05 | -3    | 23.2 |
| 9   | 9  | 5.6  | 42.00 | 79.2  | 594.05 | -6    | 20.6 |
| 10  | 10 | 5.49 | 41.18 | 73.7  | 552.80 | -8    | 18.7 |
| 7   | 7  | 4.58 | 34.35 | 73.2  | 549.05 | -11   | 15.7 |
| 4   | 4  | 4.32 | 32.40 |       | 379.53 | -12   | 15.1 |
| 0   | 0  | 3.08 | 23.10 | 68.5  | 513.79 | -12   | 13   |
| 28  | 32 | 4.97 | 37.28 | 52.53 | 394.01 | 2     | 25.8 |
| 20  | 22 | 4.7  | 35.25 | 62.4  | 468.04 | -3    | 21.8 |
| 14  | 15 | 4.25 | 31.88 | 43    | 322.53 | -7    | 18.1 |
| 8   | 9  | 2.8  | 21.00 | 50.4  | 378.03 | -9    | 15   |
| 10  | 9  | 4.18 | 31.35 | 53    | 397.53 | -9    | 16.6 |
| 7   | 5  | 3.69 | 27.68 | 49.8  | 373.53 | -9    | 16.3 |
| 4   | 6  | 3.69 | 27.68 | 48.8  | 366.03 | -9    | 16.3 |
| -35 | 9  | 5.76 | 43.20 |       | 184.52 | -17   | 12.8 |
| 46  | 44 | 6.3  | 47.25 | 48.53 | 364.00 | -6    | 21.4 |
| 34  | 26 | 6.62 | 49.65 | 48.53 | 364.00 | 1     | 27   |
| 22  | 18 | 5.46 | 40.95 | 52.13 | 391.01 | 0     | 25.1 |
| 18  | 10 | 5.44 | 40.80 | 49.2  | 369.03 | 2     | 26.5 |
| 9   | 8  | 5.66 | 42.45 | 77.86 | 584.00 | -4    | 22   |
| 10  | 9  | 4.81 | 36.08 | 54.26 | 406.98 | -9    | 17.5 |
| 2   | 5  | 4.1  | 30.75 | 62.93 | 472.01 | -6    | 18.6 |
| 14  | 14 | 5.1  | 38.25 | 48.2  | 361.53 | -7    | 19.6 |
| 13  | 12 | 5.46 | 40.95 | 42.93 | 322.00 | -6    | 20.1 |
| 13  | 11 | 4.98 | 37.35 | 44.93 | 337.00 | -8    | 18.4 |
| 9   | 10 | 4.77 | 35.78 | 46.93 | 352.00 | -11   | 16.3 |
| 8   | 8  | 4.49 | 33.68 | 45.73 | 343.00 | -13   | 14.4 |
| 7   | 8  | 4.62 | 34.65 | 43.46 | 325.98 | -15   | 13   |
| 0   | 4  | 4.4  | 33.00 | 42.26 | 316.98 | -17   | 11.8 |
| -14 | 30 | 5.69 | 42.68 | 45.73 | 343.00 | -9    | 18   |
| 22  | 24 | 4.73 | 35.48 | 50.66 | 379.98 | -1    | 23.4 |
| 18  | 18 | 4.61 | 34.58 | 55.32 | 414.93 | -7.2  | 20.3 |
| 9   | 7  | 4.13 | 30.98 | 67.06 | 502.99 | -8.1  | 16.5 |
| 3   | 2  | 3.49 | 26.18 |       | 66.98  | -11.4 | 13.6 |
| 3   | 1  | 3.33 | 24.98 | 61.2  | 459.04 | -12.5 | 12.4 |
| 3   | 3  | 3.86 | 28.95 | 58.8  | 441.04 | -11.9 | 13.4 |
| 1   | 2  | 4.13 | 30.98 | 62.4  | 468.04 | -10   | 15   |
| -34 | 8  | 4.84 | 36.30 |       | 175.96 |       | 10.5 |
| -37 | 5  | 5.86 | 43.95 |       | 231.99 | -14.7 | 13.1 |
| 25  | 24 | 6    | 45.00 | 55.33 | 415.01 | -2.7  | 22.5 |
| 22  | 19 | 6.13 | 45.98 | 49.46 | 370.98 | -4.7  | 20.9 |
| 20  | 17 | 6.93 | 51.98 | 51.46 | 385.98 | -3.8  | 22.3 |
| 20  | 17 | 6.13 | 45.98 | 56.53 | 424.01 | -7.1  | 19   |
| 14  | 11 | 5.33 | 39.98 | 50    | 375.03 | -9.6  | 16.4 |

|     |     |      |       |       |        |       |      |
|-----|-----|------|-------|-------|--------|-------|------|
| 6   | 9   | 4.4  | 33.00 | 56.66 | 424.98 | -13.2 | 13   |
| 6   | 9   | 4.2  | 31.50 | 64.26 | 481.99 | -13.5 | 12.7 |
| 7   | 56  | 5.33 | 39.98 |       | 66.01  | -14.3 | 12.9 |
| 10  | 10  | 4.57 | 34.28 | 33.2  | 249.02 | -2    | 22.6 |
| 8   | 8   | 4.93 | 36.98 | 30.2  | 226.52 | -2    | 23.2 |
| 6   | 7   | 4.85 | 36.38 | 28.8  | 216.02 | -3    | 22   |
| 4   | 6   | 4.06 | 30.45 | 28    | 210.02 | -4    | 20.2 |
| 2   | 1   | 3.6  | 27.00 | 26.8  | 201.02 | -7    | 17.2 |
| -1  | -1  | 3.6  | 27.00 | 22.5  | 168.76 | -9    | 16.3 |
| -4  | -5  | 3.44 | 25.80 | 22.5  | 168.76 | -11   | 14.6 |
| -9  | -7  | 3.37 | 25.28 | 22    | 165.01 | -13   | 13.1 |
| -8  | -7  | 3.14 | 23.55 | 26.8  | 201.02 | -14   | 11.9 |
| -13 | -12 | 2.54 | 19.05 | 26.2  | 196.52 | -15   | 10.7 |
| 85  | 83  |      | 54.00 | 45.33 | 340.00 | 2     | 27.8 |
| 3   | -2  | 4.48 | 33.60 | 52.66 | 394.98 | -1    | 23   |
| 2   | -2  | 5.4  | 40.50 | 48.4  | 363.03 | -4    | 21.7 |
| -3  | -4  | 4.68 | 35.10 | 62.93 | 472.01 | -7    | 18.8 |
| -9  | -6  | 3.57 | 26.78 | 49.33 | 370.01 | -6    | 18.1 |
| -19 | -19 | 2.72 | 20.40 | 65.2  | 489.04 | -3    | 19   |
| 16  | 12  | 4.77 | 35.78 | 49.06 | 367.98 | 1     | 25   |
| 14  | 13  | 6.14 | 46.05 | 65.73 | 493.02 | 4     | 28.7 |
| 14  | 10  | 4.65 | 34.88 |       | 250.00 | -4    | 20.7 |
| 12  | 11  | 5.36 | 40.20 | 68.26 | 511.99 | 0     | 24.7 |
| 11  | 9   | 6.69 | 50.18 | 71.2  | 534.04 | -1    | 25.6 |
| 6   | 4   | 4.49 | 33.68 | 66.8  | 501.04 | -4    | 20.7 |
| 9   | 7   | 4.72 | 35.40 | 72.53 | 544.02 | -4    | 21.3 |
| 7   | 6   | 4.93 | 36.98 | 70.4  | 528.04 | -6    | 19.5 |
| 5   | 4   | 4.98 | 37.35 | 76.53 | 574.02 | -7    | 18.9 |
| -21 | 22  | 5.66 | 42.45 | 51.46 | 385.98 | -13   | 15.6 |
| 7   | 5   | 4.88 | 36.60 | 71.06 | 532.99 | -9    | 17.2 |
| 7   | 5   | 4.6  | 34.50 | 66.66 | 499.99 | -10   | 16.3 |
| 30  | 23  | 5.46 | 40.95 | 48    | 360.03 | 2     | 26.5 |
| 20  | 18  | 6.84 | 51.30 | 51.86 | 388.98 | 4     | 29   |
| 21  | 22  | 6.5  | 48.75 | 63.6  | 477.04 | 7     | 31.3 |
| 22  | 17  | 5.97 | 44.78 | 49.6  | 372.03 | 5     | 29.5 |
| 23  | 19  | 6.25 | 46.88 | 50.13 | 376.01 | 6     | 30.5 |
| 22  | 19  | 6.02 | 45.15 | 44.8  | 336.03 | 6     | 30.6 |
| 26  | 24  | 6.74 | 50.55 | 53.46 | 400.98 | 5     | 30.1 |
| 29  | 24  | 6.42 | 48.15 | 46.13 | 346.00 | 2     | 27.1 |
| 5   | 1   | 4.86 | 36.45 | 52.4  | 393.03 | 2     | 25.7 |
| 20  | 16  |      | 49.95 | 50    | 375.03 | 1     | 27.1 |
| -30 | 9   | 4.48 | 33.60 | 52.13 | 391.01 | -2    | 22.4 |
| 4   | 1   | 5.17 | 38.78 | 49.2  | 369.03 | -1    | 23.5 |
| 15  | 7   | 6.82 | 51.15 | 44.4  | 333.03 | 3     | 28.4 |
| 15  | 11  | 6.49 | 48.68 | 37.06 | 277.97 | -1    | 25.1 |
| 15  | 8   | 7.38 | 55.35 | 48.8  | 366.03 | 3     | 29.4 |
| 8   | 4   | 7.28 | 54.60 | 47.06 | 352.98 | 0     | 26.6 |
| 6   | 2   | 7.24 | 54.30 | 52.2  | 391.53 | -1    | 26   |
| 6   | 1   | 6.93 | 51.98 | 46.53 | 349.00 | -4    | 23.5 |
| 4   | -3  | 5.88 | 44.10 | 53.6  | 402.03 | -5    | 21.3 |

|    |     |       |        |       |        |      |      |
|----|-----|-------|--------|-------|--------|------|------|
| 10 | 6   | 5.93  | 44.48  | 45.73 | 343.00 | -8   | 19.5 |
| 11 | 5   | 5.66  | 42.45  | 47.2  | 354.03 | -10  | 17.7 |
| -6 | -10 | 4.93  | 36.98  | 49.2  | 369.03 | -13  | 15.1 |
| -5 | -12 | 3.42  | 25.65  | 65.6  | 492.04 | -12  | 13.7 |
| 37 | 37  | 9.06  | 67.96  | 24.8  | 186.02 | 4    | 30.4 |
| 34 | 34  | 9.2   | 69.01  | 24.93 | 186.99 | 0.8  | 27.7 |
| 38 | 38  | 9.33  | 69.98  | 24.13 | 180.99 | 0.7  | 26.4 |
| 32 | 32  | 9.06  | 67.96  | 29.6  | 222.02 | -2.3 | 24.9 |
| 21 | 21  | 7.24  | 54.30  | 42.66 | 319.98 | -4   | 23.2 |
| 27 | 27  | 8.8   | 66.01  | 31.06 | 232.97 | -3.3 | 23.9 |
| 38 | 38  | 7.46  | 55.95  | 49.06 | 367.98 | 1    | 27.4 |
| 35 | 35  | 8.62  | 64.66  | 55.06 | 412.98 | 0    | 27.5 |
| 32 | 32  | 8.21  | 61.58  | 48.4  | 363.03 | -1   | 26.4 |
| 31 | 31  | 7.62  | 57.15  | 48.9  | 366.78 | -1   | 26   |
| 30 | 30  | 7.32  | 54.90  | 41.2  | 309.03 | -5   | 22.7 |
| 28 | 28  | 7.7   | 57.75  | 46.53 | 349.00 | -4   | 23.8 |
| 42 | 42  | 10.8  | 81.01  | 35.73 | 268.00 | 1    | 29.6 |
| 42 | 42  | 12.24 | 91.81  | 33.6  | 252.02 | 1    | 30.3 |
| 34 | 34  | 11.3  | 84.76  | 26.93 | 201.99 | -2   | 27.1 |
| 30 | 30  | 13.62 | 102.16 | 29.06 | 217.97 | -1   | 28.8 |
| 32 | 32  | 15.42 | 115.66 | 25.86 | 193.97 | -2   | 29.5 |
| 39 | 39  | 13.74 | 103.06 | 31.2  | 234.02 | -2   | 28.3 |
| 37 | 37  | 8.49  | 63.68  | 38    | 285.02 | -1   | 26.4 |
| 48 | 48  | 7.32  | 54.90  | 35.86 | 268.97 | 1    | 27.4 |
| 36 | 36  | 8.38  | 62.86  | 36.93 | 277.00 | -2   | 25.8 |
| 43 | 43  | 8.12  | 60.91  | 38.93 | 292.00 | 1    | 27.6 |
| 38 | 38  | 7.26  | 54.45  | 38.66 | 289.97 | 0    | 27.4 |
| 37 | 37  | 8.46  | 63.46  | 40.4  | 303.02 | 0    | 27.5 |
| 38 | 38  | 5.61  | 42.08  | 46.6  | 349.53 | -1   | 23.9 |
| 17 | 17  | 5.81  | 43.58  | 46.13 | 346.00 | -3   | 22.7 |
| 22 | 22  | 4.57  | 34.28  |       | 195.99 | -7   | 18.4 |
| 39 | 39  | 4.93  | 36.98  | 47.86 | 358.98 | -3   | 22.1 |
| 17 | 17  | 3.9   | 29.25  | 52.13 | 391.01 | -5   | 19.6 |
| 23 | 23  | 4.88  | 36.60  | 35.06 | 262.97 | -5   | 20.8 |
| 17 | 17  | 3.22  | 24.15  | 60    | 450.04 | -5   | 18.2 |
| 13 | 13  | 3.45  | 25.88  | 63.46 | 475.99 | -4   | 19.4 |
| 64 | 69  | 4.98  | 37.35  | 49.86 | 373.98 | 4    | 27.3 |
| 73 | 77  | 5.14  | 38.55  | 53.2  | 399.03 | 1    | 25.4 |
| 49 | 54  | 5.21  | 39.08  | 61.33 | 460.01 | 1    | 25.3 |
| 47 | 51  | 4.74  | 35.55  | 49.86 | 373.98 | -1   | 23.2 |
| 42 | 47  | 5.21  | 39.08  | 59.73 | 448.01 | -1   | 23.5 |
| 48 | 52  | 5.45  | 40.88  | 63.86 | 478.99 | 2    | 26.1 |
| 49 | 53  | 5     | 37.50  | 60    | 450.04 | 1    | 24.8 |
| 48 | 53  | 5.16  | 38.70  | 54.8  | 411.03 | -1   | 23.9 |
| 41 | 45  | 5.16  | 38.70  | 52    | 390.03 | -3   | 22.2 |
| 37 | 42  | 5.61  | 42.08  | 66.4  | 498.04 | -3   | 23.1 |
| 34 | 38  | 5.96  | 44.70  | 61.33 | 460.01 | -3   | 22.8 |
| 32 | 36  | 5.6   | 42.00  | 53.73 | 403.01 | -6   | 20.7 |
| 33 | 39  | 5.4   | 40.50  | 66.4  | 498.04 | 0    | 25.2 |
| 42 | 51  | 5.32  | 39.90  | 59.6  | 447.04 | -3   | 22.8 |



|    |      |      |       |       |        |      |      |
|----|------|------|-------|-------|--------|------|------|
| 29 | 36   | 4.62 | 34.65 | 49.73 | 373.01 | -7   | 19.1 |
| 21 | 31   | 4.18 | 31.35 | 54.8  | 411.03 | -8   | 17.8 |
| 16 | 27   | 3.93 | 29.48 | 50.4  | 378.03 | -9   | 16.4 |
| 15 | 26   | 3.66 | 27.45 | 41.73 | 313.00 | -11  | 14.7 |
| 15 | 25   | 3.26 | 24.45 | 42.4  | 318.03 | -12  | 13.9 |
| 14 | 23   | 3.54 | 26.55 | 48.66 | 364.98 | -12  | 14.2 |
| 15 | 21   | 2.85 | 21.38 | 51.73 | 388.01 | -13  | 12.3 |
| 9  | 12   | 2.82 | 21.15 | 52    | 390.03 | -12  | 12.9 |
| 9  | 14   | 2.6  | 19.50 | 54.26 | 406.98 | -12  | 12.4 |
| 5  | 8    | 2.2  | 16.50 | 50.8  | 381.03 | -13  | 11.1 |
| 39 | 38   | 5.14 | 38.55 | 53.33 | 400.01 | 3    | 27.2 |
| 40 | 37   | 5.26 | 39.45 | 53.46 | 400.98 | 5    | 28.5 |
| 40 | 38   | 4.85 | 36.38 | 52.13 | 391.01 | 1    | 25.1 |
| 37 | 35   | 4.69 | 35.18 | 50.93 | 382.01 | -1   | 23.3 |
| 34 | 30   | 4.76 | 35.70 | 60.53 | 454.01 | -1   | 23.2 |
| 31 | 29   | 5.04 | 37.80 | 60.13 | 451.01 | -1   | 23.9 |
| 29 | 26   | 5.29 | 39.68 | 59.46 | 445.99 | -1   | 24.1 |
| 27 | 24   | 5.33 | 39.98 | 53.46 | 400.98 | -2   | 23.5 |
| 28 | 25   | 4.8  | 36.00 | 51.33 | 385.01 | -4   | 20.9 |
| 25 | 23   | 5.3  | 39.75 | 48.93 | 367.01 | -3   | 22.3 |
| 23 | 19   | 4.9  | 36.75 | 52.53 | 394.01 | -3   | 22.1 |
| 19 | 18   | 5    | 37.50 | 49.06 | 367.98 | -1   | 23.6 |
| 19 | 19   | 4.77 | 35.78 | 52.66 | 394.98 | -1   | 23.4 |
| 19 | 18   | 4.84 | 36.30 | 49.33 | 370.01 | 0    | 24.3 |
| 18 | 18   | 4.44 | 33.30 | 48.8  | 366.03 | -2   | 22.6 |
| 17 | 14   | 4.8  | 36.00 | 57.86 | 433.99 | 0    | 24   |
| 16 | 15   | 4.5  | 33.75 | 52.13 | 391.01 | -1   | 23.1 |
| 16 | 14   | 4.58 | 34.35 | 50.4  | 378.03 | -2   | 22.6 |
| 16 | 15   | 4.25 | 31.88 | 46.4  | 348.03 | -4   | 20.7 |
| 13 | 11   | 4.04 | 30.30 | 46.93 | 352.00 | -6   | 18.9 |
| 11 | 10   | 4.14 | 31.05 | 46.66 | 349.98 | -5   | 19.5 |
| 13 | 9    | 3.76 | 28.20 | 43.06 | 322.98 | -7   | 17.4 |
| 12 | 12   | 5.3  | 39.75 | 38.66 | 289.97 | -2   | 22.9 |
| 40 | 39   | 4.97 | 37.28 | 43.86 | 328.98 | -1   | 23.6 |
| 40 | 39   | 5.14 | 38.55 | 46.4  | 348.03 | -1   | 24.1 |
| 36 | 36   | 4.58 | 34.35 | 45.73 | 343.00 | -4   | 21   |
| 29 | 29   | 5.6  | 42.00 | 38.26 | 286.97 | -7   | 18.7 |
| 31 | 30   | 5.2  | 39.00 | 42.4  | 318.03 | -5   | 18.1 |
| 26 | 26   | 6.93 | 51.98 | 35.85 | 268.90 | -3.8 | 22.2 |
| 38 | 37   | 4.84 | 36.30 | 40.1  | 300.77 | -4   | 18   |
| 57 | 55   |      | 7.50  |       | 7.50   |      |      |
| 55 | 54   |      | 7.50  |       | 7.50   |      |      |
| 49 | 49   |      | 7.50  |       | 7.50   |      |      |
| 5  | -1   |      | 7.50  |       | 7.50   |      |      |
| 63 | 61   |      | 7.50  |       | 7.50   |      |      |
| 52 | 52   | 7.86 | 58.95 | 38.8  | 291.02 | -1.4 | 25.9 |
| 45 | 45.5 | 7.33 | 54.98 | 59.6  | 447.04 | 0.2  | 26.4 |
| 57 | 57   | 7.33 | 54.98 | 65.2  | 489.04 | 1.4  | 27.6 |
| 38 | 26   | 7.52 | 56.40 | 57.86 | 433.99 | -5   | 22.6 |
| 40 | 38   | 5.52 | 41.40 | 62    | 465.04 | -2   | 23.1 |
| 44 | 36   | 7.13 | 53.48 | 60.4  | 453.04 | -4   | 23.6 |

|     |     |      |       |       |        |    |      |
|-----|-----|------|-------|-------|--------|----|------|
| 35  | 26  | 6.92 | 51.90 | 61.33 | 460.01 | -5 | 22.3 |
| 42  | 37  | 6.76 | 50.70 | 62    | 465.04 | -3 | 23.5 |
| 34  | 28  | 5.88 | 44.10 | 46.13 | 346.00 | -2 | 23.8 |
| 52  | 45  | 6.05 | 45.38 | 61.33 | 460.01 | -2 | 24   |
| 33  | 26  | 4.5  | 33.75 | 47.2  | 354.03 |    | 16.8 |
| 51  | 66  | 5.41 | 40.58 | 52    | 390.03 | -3 | 22.7 |
| 33  | 48  | 5.7  | 42.75 | 50.93 | 382.01 | -2 | 23.8 |
| 33  | 44  | 4.62 | 34.65 | 48.26 | 361.98 | -3 | 22.1 |
| 39  | 48  | 5.89 | 44.18 | 51.46 | 385.98 | -1 | 24.2 |
| 22  | 34  | 4.66 | 34.95 | 43.73 | 328.00 | -4 | 20.7 |
| 14  | 29  | 5.04 | 37.80 | 60.26 | 451.99 | 0  | 24.3 |
| 12  | 29  | 4.9  | 36.75 | 51.86 | 388.98 | 0  | 24.5 |
| 10  | 18  | 5.14 | 38.55 | 51.73 | 388.01 | 0  | 24.8 |
| 26  | 39  | 4.5  | 33.75 | 61.06 | 457.99 | 4  | 27.3 |
| 100 | 108 | 5.09 | 38.18 | 47.73 | 358.00 | -3 | 22.5 |
| 33  | 41  | 5.26 | 39.45 | 60.66 | 454.99 | -3 | 22.5 |
| 21  | 30  | 5    | 37.50 | 63.6  | 477.04 | -5 | 20.3 |
| 21  | 28  | 6.44 | 48.30 | 65.33 | 490.02 | -4 | 22.8 |
| 39  | 45  | 5.53 | 41.48 | 63.86 | 478.99 | -8 | 19.2 |
| 16  | 23  | 6.14 | 46.05 | 60.53 | 454.01 | -7 | 20.2 |
| 15  | 23  | 5.77 | 43.28 | 60    | 450.04 | -6 | 20.6 |

APP APP checked PCO2(Kpa) PCO2(mmHg) PO2(Kpa) PO2(mmHg) BEecf(mmol/L) HCO3(mmol/L)

| Hemoglobina(g/dl) | Platelets (/mm3)x103 | APTT(sec) | INR  | UREA  | CREATININE |
|-------------------|----------------------|-----------|------|-------|------------|
| 7.7               | 288                  | 14.3      |      | 27.2  | 2.71       |
| 7.4               | 284                  | 14.7      | 0.69 | 31.4  | 2.71       |
| 7.6               | 281                  | 14.7      | 0.81 | 27.7  | 2.31       |
| 7.2               | 265                  | 14.7      | 0.8  | 20.8  | 2.68       |
| 7.2               | 272                  | 15.4      | 0.79 | 27.8  | 2.22       |
| 7.4               | 284                  | 9.5       | 0.93 | 29.6  | 2.77       |
| 7.2               | 265                  | 15.5      | 1.06 | 16.7  | 2.08       |
| 7.6               | 311                  | 26.7      |      | 16    | 2.33       |
| 7.6               | 307                  | 8.5       | 0.75 | 20.1  | 2.65       |
| 7.4               | 303                  | 8.4       | 0.82 | 15    | 2.11       |
| 7.5               | 293                  | 14.4      | 0.87 | 11.91 | 1.84       |
| 7.7               | 257                  | 15.9      | 0.87 | 12.81 | 1.91       |
| 7.3               | 278                  | 12.4      | 0.76 | 12.31 | 2.57       |
| 7.8               | 267                  | 16        | 0.95 | 24.11 | 2.05       |
| 6.9               | 412                  | 5.1       | 0.69 | 25.6  | 2.4        |
| 6.9               | 492                  | 10        | 0.69 | 30.8  | 2.6        |
| 6.9               | 426                  | 9         | 0.74 | 24.3  | 1.9        |
| 6.8               | 406                  | 9.2       | 0.76 | 26.5  | 2.12       |
| 6.9               | 472                  | 12.2      | 0.79 | 21.2  | 2.67       |
| 7                 | 398                  | 7.4       | 1.1  | 17.11 | 2.9        |
| 7.1               | 415                  | 7         | 0.87 | 26.5  | 2.7        |
| 7.6               | 393                  | 8.9       |      | 17    | 2.3        |
| 7.8               | 421                  | 11.3      | 0.96 | 18.7  | 2.65       |
| 7.9               | 418                  | 14.8      | 0.91 | 15.8  | 2.33       |
| 8.2               | 423                  | 19.7      | 0.86 | 16.5  | 1.98       |
| 7.9               | 459                  | 35.1      | 0.83 | 13.3  | 2.91       |
| 8                 | 426                  | 10.3      | 0.8  | 14.7  | 2.8        |
| 8.2               | 425                  | 10.6      | 0.99 | 25.2  | 2.16       |
| 8.8               | 504                  | 19.7      | 1.21 | 25.6  | 2.13       |
| 8.9               | 470                  | 21.6      | 0.99 | 21.3  | 1.97       |
| 8.6               | 504                  | 44.8      | 1.21 | 19.8  | 2.35       |
| 8.5               | 471                  | 10.6      | 0.65 | 18.9  | 2.13       |
| 8.8               | 470                  | 17.9      | 0.85 | 23.2  | 1.65       |
| 8.3               | 425                  | 12.4      | 0.64 | 16    | 2.05       |
| 8                 | 422                  | 20        | 0.79 | 20.7  | 2.16       |
| 8.5               | 526                  | 11.7      | 1.44 | 12.3  | 0.97       |
| 7.5               | 469                  | 11.4      | 1.27 | 8.7   | 0.96       |
| 9.7               | 461                  | 12        | 1.27 | 13.4  | 0.93       |
| 9.4               | 472                  | 14.6      | 1.14 | 17    | 1.1        |
| 9.8               | 431                  | 12.1      | 1.41 | 12.1  | 1.08       |
| 8.6               | 440                  | 11.9      | 1.36 | 20    | 1.19       |
| 9.5               | 445                  | 11.2      | 1.14 | 16.6  | 1.25       |
| 8.8               | 336                  | 29        | 1.2  | 15    | 2.04       |
| 9.3               | 333                  | 20.4      | 1.24 | 18    | 1.93       |
| 17.9              | 340                  | 36.7      | 1.21 | 15    | 2.09       |
| 8.5               | 410                  | 28.8      | 1.2  | 20.7  | 1.85       |
| 9.1               | 392                  | 39.6      | 1.41 | 25.1  | 2.35       |
| 9.3               | 382                  | 31.6      | 1.33 | 14.7  | 1.82       |
| 9.4               | 370                  | 25.9      | 1.36 | 20.6  | 2.69       |
| 9.1               | 490                  | 18.4      | 1.21 | 11.7  | 2.31       |
| 8.8               | 478                  | 18        | 1.18 | 19.9  | 2.25       |

|      |     |      |      |      |      |
|------|-----|------|------|------|------|
| 8.7  | 470 | 15.6 | 1.18 | 16.8 | 2.06 |
| 8.7  | 470 | 14.9 | 1.24 | 12.3 | 2.14 |
| 9.2  | 439 | 13.3 | 1.59 | 18.1 | 3.22 |
| 8.5  | 437 | 13.3 | 1.54 | 23.5 | 2.66 |
| 8.5  | 457 | 11.9 | 1.5  | 19.8 | 2.7  |
| 8.7  | 380 | 20.5 | 1.57 | 25   | 2.42 |
| 9    | 383 | 17.1 | 1.42 | 32.1 | 2.07 |
| 9.2  | 385 | 26.6 | 1.5  | 25.9 | 1.85 |
| 8.9  | 382 | 38.4 | 1.55 | 28.4 | 2.03 |
| 8.8  | 352 | 28.1 | 1.59 | 24.1 | 2.17 |
| 9.1  | 380 | 24   | 1.21 | 26.6 | 2.24 |
| 9.1  | 425 | 24.5 | 1.69 | 24.9 | 2.08 |
| 8.4  | 541 | 20.3 | 1.07 | 19.6 | 2.43 |
| 8.4  | 541 | 14.8 | 0.97 | 19.3 | 2.3  |
| 8.1  | 500 | 12.2 | 1.07 | 14.2 | 1.25 |
| 8.4  | 500 | 20.5 | 1    | 13.9 | 2.09 |
| 8.4  | 524 | 14.9 | 1.11 | 15.9 | 2.22 |
| 8.2  | 506 | 12.7 | 1.12 | 14.9 | 1.31 |
| 8.3  | 528 | 17.1 | 1.18 | 19.8 | 2.12 |
| 8.2  | 694 | 12.4 | 0.83 | 27.5 | 3.09 |
| 8.4  | 597 | 13.5 | 0.91 | 31.3 | 3.29 |
| 8.4  | 593 | 12   | 0.91 | 35   | 3.44 |
| 8.4  | 601 | 15.2 | 0.97 | 27   | 3.52 |
| 8.4  | 593 | 13.4 | 0.87 | 30.5 | 3.81 |
| 8.3  | 568 | 13.1 | 0.8  | 32.8 | 3.79 |
| 8.5  | 575 | 21   | 0.74 | 40.1 | 4.2  |
| 8.4  | 572 | 13.1 | 0.88 | 35.9 | 3.88 |
| 8.3  | 502 | 16.8 | 0.67 | 38.9 | 4.73 |
| 8.5  | 547 | 16.3 | 0.75 | 35.3 | 4.46 |
| 8.5  | 528 | 16.8 | 0.73 | 40.4 | 4.6  |
| 9.1  | 475 | 18.5 | 0.92 | 31.8 | 3.08 |
| 9.3  | 534 | 18.2 | 1.12 | 37.5 | 3.29 |
| 10   | 515 | 18.3 | 1.24 | 37   | 3.44 |
| 10.9 | 535 | 29.7 | 1.25 | 42.3 | 3.72 |
| 10.5 | 526 | 61   | 1.14 | 43.8 | 3.85 |
| 10.1 | 520 | 32.5 | 1.22 | 45.5 | 4.02 |
| 10.1 | 543 | 36.2 | 1.14 | 44.2 | 4.16 |
| 8.3  | 449 | 21.1 | 1.17 | 37   | 2.94 |
| 8.4  | 469 | 18   | 1.14 | 29.7 | 2.85 |
| 8.9  | 501 | 25.9 | 1.3  | 34.5 | 3    |
| 8.7  | 480 | 21.1 | 1.17 | 35.5 | 3.05 |
| 8.8  | 480 | 61.4 | 1.27 | 37.6 | 3.33 |
| 8.7  | 493 | 22.9 | 1.27 | 36.4 | 3.49 |
| 8.9  | 461 | 54.9 | 1.27 | 47.1 | 4.09 |
| 8.7  | 492 | 32.2 | 1.27 | 46.2 | 3.57 |
| 8.8  | 472 | 53.3 | 1.12 | 41.3 | 3.85 |
| 8.7  | 483 | 26   | 1.18 | 44.4 | 3.76 |
| 9.1  | 498 | 29.1 | 1.05 | 44.1 | 4.04 |
| 8.9  | 461 | 48.5 | 1    | 23.9 | 2.72 |
| 8.9  | 477 | 15   | 1.04 | 24.6 | 2.98 |
| 8.9  | 489 | 16.4 | 1.12 | 21.1 | 3.08 |

|      |     |       |      |      |      |
|------|-----|-------|------|------|------|
| 8.8  | 475 | 24.7  | 1.18 | 19.2 | 2.88 |
| 8.8  | 437 | 19.8  | 1.2  | 22.5 | 3.14 |
| 9    | 461 | 34.7  | 1.12 | 28.9 | 3.23 |
| 9.3  | 471 | 30.7  | 1.11 | 27.5 | 3.31 |
| 9    | 448 | 49.6  | 1.25 | 30.8 | 3    |
| 9    | 444 | 41.9  | 1.15 | 26   | 2.69 |
| 9    | 397 | 91.6  | 1.03 | 30.1 | 2.96 |
| 9.1  | 396 | 43.4  | 1.05 | 24.7 | 2.77 |
| 8.9  | 379 | 104.9 | 0.95 | 24.4 | 3.96 |
| 9.4  | 393 | 23.4  | 1.15 | 20.7 | 1.86 |
| 9.1  | 356 | 21.5  | 1.31 | 22.7 | 2.37 |
| 9.1  | 368 | 51.9  | 1.07 | 19.9 | 2.16 |
| 8.9  | 360 | 24.7  | 1.17 | 28.6 | 3.02 |
| 8.7  | 348 | 34.3  | 1.15 | 27.5 | 2.94 |
| 8.8  | 337 | 32.1  | 1.28 | 24.1 | 3.25 |
| 8.7  | 326 | 53.5  | 1.15 | 26.6 | 3.35 |
| 8.5  | 308 | 51.6  | 1.2  | 34.9 | 3.68 |
| 8.5  | 327 | 32.9  | 1.21 | 29.6 | 3.39 |
| 8.6  | 325 | 61.3  | 1.2  | 28.2 | 3.56 |
| 8.5  | 321 | 35.7  | 1.1  | 27.4 | 3.57 |
| 9.7  | 393 | 25.2  | 1.15 | 28.8 | 3.76 |
| 10   | 432 | 22.5  | 1.42 | 37.7 | 3.77 |
| 10.2 | 407 | 23.3  | 1.47 | 26.6 | 3.82 |
| 9.9  | 410 | 18.1  | 1.2  | 31   | 3.88 |
| 9.9  | 431 | 16.2  | 1.18 | 29.7 | 3.92 |
| 10   | 435 | 16.7  | 1.2  | 29.3 | 4.23 |
| 9.9  | 412 | 26.9  | 1.17 | 28.3 | 4.1  |
| 9.7  | 412 | 22.1  | 1.11 | 32.9 | 4.29 |
| 8.1  | 493 | 30.1  | 1.2  | 19.7 | 1.83 |
| 8    | 519 | 28.6  | 1.28 | 20.7 | 2.22 |
| 8.3  | 558 | 23    | 1.24 | 14.2 | 2.56 |
| 8.8  | 589 | 35.8  | 1.27 | 21   | 2.69 |
| 9.1  | 591 | 24.1  | 1.21 | 24   | 2.84 |
| 8.9  | 580 | 30.2  | 1.22 | 22.7 | 2.67 |
| 9    | 586 | 40.8  | 1.1  | 21.8 | 2.98 |
| 8.8  | 581 | 37    | 1.08 | 24.9 | 3.04 |
| 8.2  | 424 | 23.6  | 1.18 | 29.4 | 2.84 |
| 8.2  | 460 | 19.2  | 1.25 | 37.5 | 3.06 |
| 8.6  | 461 | 40.5  | 1.07 | 35.2 | 3.16 |
| 8.6  | 449 | 28.3  | 1.24 | 34.4 | 3.23 |
| 8.8  | 439 | 24.5  | 1.25 | 35.6 | 3.35 |
| 8.9  | 468 | 22.9  | 1.14 | 36.9 | 3.36 |
| 8.8  | 448 | 44.1  | 1.03 | 35.5 | 3.49 |
| 8.8  | 453 | 39.7  | 1.2  | 38.9 | 3.46 |
| 8    | 547 | 27.3  | 1.3  | 28.1 | 2.18 |
| 9    | 612 | 18    | 1.31 | 33   | 2.12 |
| 8.4  | 573 | 16.4  | 1.46 | 25.9 | 2.41 |
| 8.3  | 612 | 20.7  | 1.47 | 32.8 | 2.49 |
| 8.4  | 608 | 18.5  | 1.39 | 33.6 | 2.57 |
| 7.4  | 596 | 18.9  | 1.33 | 33   | 2.59 |
| 7.4  | 597 | 20.8  | 1.38 | 35.5 | 2.73 |
| 7    | 573 | 23.6  | 1.28 | 31.2 | 2.73 |

|      |      |       |      |       |      |
|------|------|-------|------|-------|------|
| 7.5  | 970  | 21.9  | 1.25 | 23.9  | 2.45 |
| 7.2  |      | 19.3  | 1.27 | 22.1  | 2.46 |
| 7.9  | 1086 | 17.7  | 1.27 | 23.8  | 2.7  |
| 7.9  | 1094 | 19    | 1.1  | 24.5  | 2.88 |
| 8.2  | 1138 | 25.9  | 1.04 | 27.2  | 3.01 |
| 8.4  | 1154 | 17.9  | 1.03 | 22.9  | 3.15 |
| 8.4  | 1088 | 17.9  | 1.01 | 26    | 3.26 |
| 8.1  | 1111 | 26.7  | 0.97 | 26.7  | 3.25 |
| 8.2  | 601  | 20.7  | 1.1  | 21.2  | 2.66 |
| 8.5  | 634  | 12.6  | 1.2  | 23.3  | 2.97 |
| 9.3  | 638  | 19.5  | 1.05 | 25.2  | 3.05 |
| 9.2  | 660  | 12.3  | 1.14 | 32.6  | 3.37 |
| 9.5  | 634  | 17.4  | 1.01 | 30.6  | 3.55 |
| 10.2 | 560  | 13.8  | 0.99 | 32.7  | 3.61 |
| 9.4  | 576  | 21.9  | 1    | 33.2  | 3.76 |
| 9.4  | 582  | 16.8  | 0.96 | 33.2  | 3.91 |
| 9.7  | 569  | 42.2  | 1.01 | 27.4  | 4.35 |
| 9.5  | 538  | 22.3  | 0.95 | 33.2  | 4.36 |
| 10.5 | 538  | 111.8 | 0.85 | 34.2  | 4.56 |
| 8.5  | 775  | 20.4  | 1.15 | 20.9  | 2.64 |
| 8.8  | 824  | 54.4  | 1.07 | 25.1  | 2.79 |
| 8.9  | 835  | 28.7  | 1.07 | 20.8  | 2.9  |
| 8.8  | 820  | 74.2  | 1.17 | 17.2  | 3.08 |
| 8.8  | 835  | 49.1  | 1.22 | 19.4  | 3.15 |
| 8.8  | 784  | 29.5  | 1.21 | 25.7  | 3.28 |
| 8.9  | 848  | 87.5  | 0.86 | 25.3  | 3.34 |
| 9.1  | 784  | 73.2  | 0.93 | 22.3  | 3.51 |
| 9    | 744  | 82.1  | 0.93 | 27.4  | 3.62 |
| 8.9  | 728  | 32.5  | 0.93 | 23.8  | 3.68 |
| 8.8  | 644  | 15.5  | 0.91 | 19.6  | 3.67 |
| 8.7  | 662  | 26.1  | 0.97 | 26.1  | 3.77 |
| 9.5  | 614  | 48.4  | 1.03 | 25.2  | 2.08 |
| 9.9  | 636  | 31.5  | 0.75 | 27.4  | 2.25 |
| 10.2 | 638  | 94.5  |      | 31.9  | 2.38 |
| 10.3 | 632  | 26.9  | 0.75 | 24    | 2.46 |
| 10.5 | 636  | 31.5  | 0.76 | 22.1  | 2.69 |
| 10.8 | 609  | 28.4  | 0.71 | 24.6  | 2.75 |
| 10.2 | 579  | 68    | 0.77 | 30.9  | 2.61 |
| 10.4 | 558  | 25.4  | 0.71 | 29.5  | 2.98 |
| 9.5  | 516  | 80.7  | 0.76 | 33.8  | 2.95 |
| 9.3  | 523  | 107.6 | 0.65 | 30.6  | 3.13 |
| 9.1  | 546  | 92.7  | 0.65 | 25.7  | 3.19 |
| 10   | 635  | 104.7 | 0.76 | 25.9  | 2.51 |
| 8.6  | 360  | 22.2  | 0.9  | 10.5  | 2.11 |
| 9.3  | 413  | 19.3  | 0.77 | 16.1  | 2.51 |
| 10   | 423  | 40.2  | 0.75 | 14    | 2.17 |
| 10.4 | 415  | 21.6  | 0.81 | 13.9  | 2.7  |
| 10.4 | 437  | 18.5  | 0.9  | 13.7  | 2.74 |
| 10.8 | 431  | 25.2  | 0.83 | 17.1  | 2.91 |
| 10.6 | 435  | 27.7  | 0.92 | 23.08 |      |
| 10.4 | 434  | 19.9  | 0.81 | 19    | 3.07 |
| 10.7 | 470  | 73.3  | 0.79 | 19.7  | 3.18 |

|      |     |       |      |       |      |
|------|-----|-------|------|-------|------|
| 11.2 | 477 | 45.1  | 0.96 | 22.2  | 3.32 |
| 10.2 | 422 | 61    | 0.93 | 19.7  | 3.31 |
| 10.8 | 462 | 22.4  | 1    | 17.7  | 3.48 |
| 8.6  | 318 | 24.8  | 1.08 | 13.1  | 1.69 |
| 8.6  | 344 | 23.8  | 0.96 | 14.6  | 1.66 |
| 8.5  | 340 | 101.8 | 0.97 | 15.6  | 2.47 |
| 8.6  | 358 | 29    | 1.12 | 14.8  | 2.58 |
| 8.9  | 348 | 68.3  | 1.03 | 15.6  | 2.66 |
| 9.3  | 348 | 43.5  | 1.08 | 13.9  | 2.74 |
| 9.4  | 355 | 114.2 | 1.1  | 16.8  | 2.84 |
| 9.7  | 343 | 82.5  | 0.97 | 14.3  | 2.95 |
| 9.7  | 319 |       | 1    | 19.6  | 3.13 |
| 9.4  | 330 | 132.8 | 0.82 | 15.5  | 3.13 |
| 9    | 306 | 104.9 | 0.96 | 19.1  | 3.13 |
| 8.2  | 290 | 86.9  | 1.07 | 20.9  | 3.04 |
| 8.7  | 390 | 19.3  | 1.17 | 24.3  | 1.89 |
| 8.6  | 445 | 18    | 1.17 | 26.3  | 2.05 |
| 8.5  | 407 | 40.5  | 1.08 | 24.8  | 2.17 |
| 8    | 393 | 33.1  | 1.06 | 26.3  | 2.31 |
| 8.4  | 412 | 19.4  | 1.04 | 21.7  | 2.33 |
| 8    | 411 | 39.4  | 0.99 | 24.1  | 2.82 |
| 8.6  | 424 | 30.2  | 1.05 | 20.9  | 2.25 |
| 9.3  | 397 | 56.1  | 1.03 | 28.2  | 2.58 |
| 11.8 | 552 | 37    | 1.36 | 26.4  | 2.86 |
| 11.6 | 522 | 18.3  | 1.34 | 30.1  | 2.63 |
| 10.6 | 534 | 34.5  | 1.25 | 31.9  | 2.49 |
| 10   | 480 | 18.8  | 1.33 | 29.6  | 2.38 |
| 11.9 | 445 | 32    | 1.2  | 27.7  | 2.97 |
| 10.1 | 477 | 31    | 1.18 | 28.5  | 3.03 |
| 9.8  | 498 | 65.9  | 1.08 | 26.6  | 2.79 |
| 8.6  | 363 | 17.5  | 1.25 | 34    | 2.04 |
| 9.4  | 358 | 47.3  | 1.12 | 29.9  | 2.71 |
| 8.9  | 371 | 19.9  | 1.21 | 33.4  | 2.57 |
| 9.5  | 374 | 29.8  | 1.16 | 35.2  | 2.8  |
| 9.4  | 341 | 78.3  | 0.97 | 34.5  | 2.9  |
| 9    | 327 | 57.2  | 1.09 | 33.3  | 2.99 |
| 8.9  | 301 | 46.9  | 1    | 33.6  | 3.01 |
| 10.8 | 504 | 31.8  | 1.12 | 28.97 | 2.76 |
| 9.4  | 301 | 28.5  | 1.04 | 25.9  | 1.8  |
| 10.1 | 318 | 24.9  | 0.99 | 32.6  | 2.16 |
| 10   | 321 | 26.1  | 1.08 | 28.5  | 2.23 |
| 9.9  | 300 | 68.7  | 0.88 | 32.7  | 2.35 |
| 10.4 | 300 | 41.5  | 0.94 | 30.8  | 2.43 |
| 9.8  | 297 | 131.1 | 0.88 | 31.4  | 2.55 |
| 9.8  | 283 | 189   | 0.83 | 27.9  | 2.93 |
| 9.7  | 301 | 54.3  | 1.01 | 37.7  | 2.97 |
| 11.6 | 255 | 18.5  | 0.91 | 37.6  | 2.57 |
| 9.5  | 549 | 56.4  | 1.12 | 25.7  | 1.68 |
| 10.4 | 598 |       | 1.01 | 26.5  | 2.37 |
| 10.8 | 595 |       | 0.97 | 20.4  | 2.04 |
| 11.1 | 598 |       | 0.9  | 28.4  | 2.31 |
| 11   | 505 |       | 0.93 | 28.2  | 2.41 |

|      |     |       |      |      |      |
|------|-----|-------|------|------|------|
| 10.9 | 504 |       | 0.97 | 30.3 | 2.58 |
| 10.6 | 501 |       | 0.88 | 31.9 | 2.72 |
| 10.4 | 418 |       | 0.93 | 31.4 | 2.82 |
| 8.2  | 360 | 85.2  | 1.49 | 25.6 | 2.2  |
| 8.8  | 365 |       | 1.54 | 28.6 | 2.14 |
| 9.3  | 347 | 85.2  | 1.41 | 25.8 | 2.14 |
| 8.8  | 337 | 70.2  | 1.44 | 17.7 | 2.4  |
| 8.2  | 336 | 96.3  | 1.36 | 30.2 | 2.31 |
| 7.6  | 342 |       | 1.21 | 23.6 | 2.39 |
| 7    | 343 |       | 1.27 | 27.6 | 2.35 |
| 6.7  | 314 | 75    | 1.36 | 28.2 | 2.45 |
| 6    | 314 |       | 1.27 | 27   | 2.48 |
| 5.8  | 276 |       | 1.18 | 32.5 | 2.52 |
| 10.6 | 546 | 94.5  | 1.33 | 18.6 | 1.96 |
| 10.1 | 552 | 55.7  | 1.1  | 25.4 | 1.98 |
| 10   | 539 | 152   | 1.22 | 19.2 | 2.17 |
| 9.9  | 502 | 113.8 |      | 18.7 | 2.3  |
| 9.5  | 514 | 63.1  | 1.13 | 20.5 | 2.9  |
| 8.9  | 478 | 181.1 | 1.06 | 20.6 | 2.29 |
| 8.9  | 392 | 92.9  | 1.07 | 12.6 | 1.81 |
| 9.8  | 442 | 95.5  | 1.08 | 16   |      |
| 9.8  | 449 |       | 1.15 | 15.3 | 1.78 |
| 9.8  | 440 |       | 1.04 | 22.5 | 1.84 |
| 10   | 422 |       | 0.92 | 16.1 | 1.9  |
| 10   | 388 |       | 0.92 | 16.9 |      |
| 10.1 | 396 | 122.4 | 0.9  | 18.7 | 2.05 |
| 10   | 400 |       | 0.83 | 14.8 | 2.12 |
| 10.1 | 401 |       | 0.69 | 22.6 | 2.13 |
| 10.2 | 333 |       | 0.79 | 18.3 | 2.33 |
| 9.9  | 390 |       | 0.83 | 20.5 | 2.23 |
| 9.9  | 357 |       | 0.68 | 18.2 | 2.21 |
| 10.2 | 381 | 8.8   | 1.19 | 27.1 | 2.17 |
| 10.3 | 370 | 27.6  |      | 28.4 | 1.79 |
| 10.7 | 343 | 26.4  | 1.41 | 23.8 | 2.35 |
| 10.4 | 387 | 9.5   | 1.32 | 24.8 | 1.98 |
| 10.8 | 405 | 92    |      | 25.2 | 2.46 |
| 10.8 | 403 |       |      | 25.5 | 2.1  |
| 11   | 397 | 67.6  | 1.25 | 28.8 | 2.66 |
| 11   | 410 | 157.3 | 1.12 | 30   | 2.19 |
| 11.1 | 419 | 141.2 | 1.1  | 26.6 | 2.65 |
| 11.6 | 413 |       | 1.08 | 29.6 | 2.23 |
| 10   | 360 | 35.9  | 0.83 | 29.9 | 2.48 |
| 11.2 | 397 | 10.2  | 0.95 | 33.1 | 2.5  |
| 10.5 | 422 | 163.7 | 1.15 | 18.1 | 1.62 |
| 10.7 | 440 |       | 1.05 | 17.3 | 1.69 |
| 10.9 | 442 | 186   | 1.05 | 17.7 | 1.84 |
| 11.2 | 413 | 127.8 | 1.04 | 20.6 | 2.01 |
| 11.5 | 416 |       | 0.95 | 20.8 | 2.08 |
| 11.5 | 417 |       | 0.95 | 21.8 | 2.13 |
| 11.7 | 397 | 170   | 0.94 | 15.4 | 2.26 |



|      |     |       |      |       |      |
|------|-----|-------|------|-------|------|
| 11.5 | 403 |       | 1.1  | 19.1  | 2.27 |
| 12.2 | 343 |       | 0.88 | 21.7  | 2.36 |
| 11.5 | 353 |       | 0.83 | 17.8  | 2.44 |
| 10.8 | 341 | 170.5 | 0.84 | 18.6  | 2.75 |
| 7.4  | 279 | 6.5   | 1.35 | 34.1  | 2.21 |
| 6.6  | 243 | 8.5   | 1.31 | 33.2  | 3.2  |
| 6.3  | 240 | 8.2   | 1.15 | 26.2  | 2.59 |
| 6.4  | 223 | 16.2  | 1.17 | 30.4  | 3.14 |
| 4.9  | 189 | 8     |      | 26.7  | 2.24 |
| 5.8  | 201 | 8.7   | 1.28 | 27.6  | 2.65 |
| 8.3  | 521 | 21.2  | 1.2  | 18.6  | 2.55 |
| 46   | 528 | 12.2  | 1.05 | 21.4  | 2.64 |
| 8.4  | 543 | 10.7  | 0.92 | 15.9  | 2.31 |
| 8.2  | 483 | 11.5  |      | 19.4  | 1.97 |
| 8.2  | 512 | 11.6  | 0.85 | 20.3  | 2.82 |
| 8.4  | 498 | 11.9  |      | 17.3  | 2.5  |
| 8.3  | 423 | 14.3  | 1.05 | 21.4  | 1.32 |
| 8.4  | 429 | 12.3  | 1.03 | 18.2  | 1.94 |
| 8.8  | 406 | 12.1  | 0.88 | 22.7  | 1.72 |
| 8.8  | 434 | 13.2  | 0.92 | 20.2  | 1.53 |
| 8.9  | 439 | 20.6  | 1.05 | 18.7  | 1.85 |
| 8.9  | 453 | 5.1   |      | 22.2  | 1.72 |
| 6.9  | 248 | 11.3  | 0.83 | 25.5  |      |
| 7.9  | 289 | 12.8  | 0.93 | 24.5  | 1.4  |
| 6.9  | 265 | 12.2  | 0.77 | 28.6  | 2.11 |
| 7    | 272 | 12.5  | 1.04 | 26.4  | 1.8  |
| 6.8  | 292 | 12.5  | 0.85 | 24.8  | 1.78 |
| 6.9  | 279 | 11.7  | 0.76 | 29.9  | 1.65 |
| 9.3  | 502 | 68.2  | 0.8  | 15.4  | 2.52 |
| 7.6  | 411 | 35.4  | 0.71 | 16.5  | 3.2  |
| 8    | 438 | 35.7  | 0.67 | 15.2  | 3.01 |
| 9.9  | 500 | 22.1  | 0.75 | 15.5  | 2.81 |
| 7    | 370 |       | 0.63 | 15.72 | 3.21 |
| 8.8  | 426 | 6.6   | 0.67 | 17.6  | 2.9  |
| 6.8  | 356 | 34.4  | 0.58 | 16.7  | 3.33 |
| 6.7  | 353 |       | 0.58 | 14.4  | 3.4  |
| 8.6  | 379 | 54    | 1.24 | 15.8  | 2.08 |
| 9    | 401 | 102.7 | 1.24 | 14.3  | 1.58 |
| 8.5  | 392 | 130.9 | 1.22 | 27.4  | 1.64 |
| 8.9  | 400 | 86.9  | 1.23 | 17.8  | 2.17 |
| 8.4  | 423 | 143   | 1.22 | 21.9  | 2.03 |
| 8.5  | 365 | 134.9 | 1.23 | 23.5  | 1.88 |
| 8.6  | 413 | 87.3  | 1.22 | 23.5  | 1.86 |
| 8.5  | 387 | 84.7  | 1.21 | 23.9  | 2    |
| 8.6  | 398 | 107.7 | 1.23 | 19.3  | 2.16 |
| 8.3  | 362 |       | 1.22 | 24.8  | 2.29 |
| 8.2  | 365 | 101.1 | 1.22 | 24.1  | 2.41 |
| 8.1  | 342 | 151.1 | 1.23 | 25.3  | 2.53 |
| 10   | 336 | 116.5 | 1.25 | 17.1  | 3.03 |
| 11.2 | 386 | 98.3  | 1.24 | 27.9  | 2.67 |

|      |     |       |      |      |      |
|------|-----|-------|------|------|------|
| 10.7 | 386 | 35.9  | 1.16 | 24.7 | 2.92 |
| 9.9  | 378 | 141.9 | 1.23 | 23   | 3.31 |
| 9.7  | 377 |       | 1.28 | 26.9 | 2.71 |
| 9.1  | 341 |       | 1.24 | 20.3 | 3.58 |
| 8.9  | 336 |       | 1.37 | 25   | 3.07 |
| 9.2  | 311 |       | 1.26 | 24.9 | 3.18 |
| 10   | 291 |       | 1.18 | 25.4 | 3.24 |
| 10.6 | 284 |       | 1.31 | 24.4 | 3.37 |
| 10.6 | 253 |       | 1.33 | 27.1 | 3.4  |
| 10.1 | 274 |       | 1.28 |      | 3.38 |
| 6.7  | 477 | 67.8  | 1.09 | 14.7 | 1.96 |
| 7    | 545 | 97.1  | 1.23 | 20.6 | 2.04 |
| 7.2  | 500 | 76.6  | 1.22 | 14.7 | 2.04 |
| 7    | 511 | 111.1 | 1.23 | 15.6 | 1.98 |
| 7    | 500 | 89.5  | 1.22 | 20.8 | 2.05 |
| 7.1  | 494 | 157.4 | 1.23 | 22.7 | 2.15 |
| 7.2  | 511 | 117.6 | 1.22 | 21.9 | 2.2  |
| 7    | 459 |       | 1.24 | 16.3 | 2.29 |
| 7    | 470 | 146.7 | 1.23 | 18.6 | 2.39 |
| 6.9  | 475 |       | 1.23 | 19.8 | 2.43 |
| 6.7  | 444 | 265.1 | 1.23 | 16.6 | 2.45 |
| 9.7  | 270 | 105.9 | 1.26 | 26.2 | 3.27 |
| 8.9  | 263 | 144.6 | 1.26 | 33.1 | 2.85 |
| 8.5  | 262 | 116.4 | 1.25 | 29.7 | 2.91 |
| 8.4  | 261 |       | 1.26 | 32.2 | 2.81 |
| 8.4  | 275 | 121   | 1.27 | 32.4 | 2.87 |
| 8.3  | 251 |       | 1.27 | 32.7 | 2.83 |
| 8.2  | 253 |       | 1.25 | 32.2 | 2.84 |
| 8.1  | 236 | 80.9  | 1.28 | 33.5 | 2.85 |
| 8.2  | 248 |       | 1.28 | 33.1 | 3.21 |
| 8.3  | 240 |       | 1.28 |      | 2.67 |
| 8.3  | 230 | 211.6 | 1.29 | 33   | 3.05 |
| 11.1 | 221 |       | 1.27 | 23.3 | 2.12 |
| 11.1 | 231 | 389.7 | 1.29 | 28.9 | 1.77 |
| 11.5 | 208 |       | 1.39 | 20.8 | 2.34 |
| 11.2 | 209 | 86.4  | 1.27 | 21.4 | 2.25 |
| 11.6 | 186 |       | 1.35 | 20.4 | 2.3  |
| 11.7 | 210 | 193.1 | 1.35 | 20.5 | 2.09 |
| 11.6 | 186 | 384.9 | 1.3  | 18.4 | 1.98 |
| 11.8 | 199 |       | 1.29 | 22.4 | 2.4  |
| 10.5 | 293 |       | 1.22 | 24   | 2.52 |
| 10.3 | 320 | 35.5  | 1.59 | 31.7 | 2.22 |
| 10.6 | 295 |       | 1.25 | 21.6 | 2.71 |
| 10.8 | 306 |       |      | 21.7 | 2.5  |
| 10.3 | 322 |       | 1.31 | 19.6 | 2.14 |
| 10.5 | 343 |       | 1.14 | 22.2 | 2.34 |
| 10.7 | 342 | 218.9 | 1.15 | 27.5 | 1.78 |
| 10.2 | 352 | 285.6 | 1.34 | 25   | 2.05 |
| 9.5  | 358 | 54.2  | 1.14 | 31.5 | 2.48 |
| 10.6 | 382 | 115.8 | 1.22 | 29.7 | 2.31 |
| 9.5  | 352 | 34.2  | 1.2  |      |      |

|                   |                      |           |      |      |            |
|-------------------|----------------------|-----------|------|------|------------|
| 9.7               | 368                  | 31.3      | 1.12 | 28.2 | 2.03       |
| 9.7               | 352                  | 41        | 1.1  | 26.9 | 2.69       |
| 9.8               | 337                  | 71.5      | 1.25 | 34.3 | 2.38       |
| 8.5               | 360                  | 85.1      | 1.26 | 29.2 | 2.35       |
| 9.8               | 335                  | 55.7      | 1.26 | 25.5 | 2.38       |
| 9.1               | 293                  |           | 1.27 | 19.7 | 2.61       |
| 9.5               | 328                  |           | 1.45 | 25.5 | 2.33       |
| 8.7               | 312                  |           | 1.34 | 31.5 | 2.44       |
| 8.5               | 318                  |           | 1.46 |      | 2.94       |
| 8.2               | 318                  |           | 1.44 |      | 2.72       |
| 8.5               | 314                  |           |      | 27.4 | 2.79       |
| 8.8               | 308                  |           | 1.65 | 31.8 |            |
| 9.1               | 320                  |           | 1.63 | 31.6 | 2.44       |
| 8.3               | 375                  | 44.2      | 1.25 | 24.3 | 2.15       |
| 9.2               | 386                  | 222.4     | 1.28 | 22.4 | 1.85       |
| 9.8               | 378                  | 98.7      | 1.29 | 26.8 | 2.36       |
| 9.7               | 367                  |           | 1.35 | 24.5 | 2.05       |
| 9.4               | 373                  | 117.6     |      | 25.7 | 2.64       |
| 9.7               | 368                  |           | 1.25 | 22.5 | 2.23       |
| 9.4               | 327                  |           | 1.26 | 32.8 | 2.41       |
| 9.4               | 351                  |           | 1.24 | 24.1 | 2.75       |
| Hemoglobina(g/dl) | Platelets (/mm3)x103 | APTT(sec) | INR  | UREA | CREATININE |

| ALT(UI/l) | GGT(UI/L) | LDH(U/L) | ALP (U/L) | TOTAL BILIRUBIN (mg/dl) |
|-----------|-----------|----------|-----------|-------------------------|
| 38        | 38        | 1045     | 382       | 0.1                     |
| 41        | 41        | 1018     | 369       | 0.08                    |
| 40        | 26        | 956      | 365       | 0.06                    |
| 35        | 36        | 991      | 357       | 0.05                    |
| 34        | 26        | 986      | 354       | 0.05                    |
| 38        | 42        | 953      | 368       | 0.04                    |
| 37        | 47        | 896      | 369       | 0.06                    |
| 45        | 20        | 1200     | 303       | 0.21                    |
| 50        | 46        | 1225     | 312       | 0.32                    |
|           | 39        | 1116     |           | 0.35                    |
| 48        | 24        | 1176     | 309       | 0.45                    |
| 46        | 25        | 1144     | 315       | 0.41                    |
| 47        | 27        | 1036     | 310       | 0.45                    |
| 47        | 21        | 1195     | 335       | 0.32                    |
| 33        | 27        | 961      | 479       | 0.34                    |
| 39        | 40        | 1065     | 527       | 0.3                     |
| 40        |           | 1061     | 526       | 0.31                    |
| 37        | 29        | 1062     | 511       | 0.3                     |
| 39        | 35        | 1082     | 512       | 0.29                    |
| 38        | 33        | 1354     | 659       | 0.36                    |
| 40        | 42        | 1123     | 517       | 0.32                    |
| 21        | 24        | 887      | 205       | 0.25                    |
| 15        | 20        | 924      | 204       | 0.2                     |
| 21        | 22        | 936      | 209       | 0.33                    |
| 21        | 38        | 962      | 216       | 0.2                     |
| 19        | 27        | 905      | 218       | 0.18                    |
| 24        | 43        | 931      | 219       | 0.15                    |
| 17        | 31        | 928      | 220       | 0.16                    |
| 42        | 35        | 1076     | 634       | 0.3                     |
| 42        | 29        | 1089     | 624       | 0.47                    |
| 38        | 41        | 1060     | 603       | 0.37                    |
| 41        | 24        | 1046     | 555       | 0.49                    |
| 43        | 26        | 1108     | 612       | 0.49                    |
| 40        | 21        | 1162     | 557       | 0.47                    |
| 34        | 32        | 975      | 527       | 0.43                    |
| 32        | 27        | 871      | 401       | 0.06                    |
| 34        | 28        | 855      | 401       | 0.07                    |
| 41        | 28        | 889      | 430       | 0.04                    |
| 12        | 23        | 824      | 347       | 0.01                    |
| 38        | 19        | 829      | 403       | 0.01                    |
| 35        | 27        | 918      | 401       | 0.06                    |
| 39        | 27        | 724      | 417       | 0.06                    |
| 29        | 49        | 2239     | 263       | 0.12                    |
| 24        |           | 2065     | 251       | 0.09                    |
| 21        | 41        | 1914     | 239       | 0.11                    |
| 33        |           | 2014     | 263       | 0.11                    |
| 21        | 42        | 1978     | 252       | 0.12                    |
| 21        | 42        | 1961     | 264       | 0.14                    |
| 18        | 35        |          | 226       | 0.07                    |
| 23        | 27        | 957      | 367       | 0.1                     |
| 28        | 39        | 918      | 377       | 0.1                     |

|    |    |      |     |      |
|----|----|------|-----|------|
| 35 | 24 | 827  | 320 | 0.09 |
| 25 | 27 | 757  |     |      |
| 25 | 27 | 1038 | 348 |      |
| 24 | 22 | 934  | 456 |      |
| 35 | 25 | 949  | 361 |      |
| 16 | 48 | 751  | 211 | 0.08 |
| 19 | 38 | 723  | 218 | 0.09 |
| 17 | 38 | 710  | 218 | 0.12 |
| 18 | 44 | 713  | 194 | 0.11 |
| 19 | 32 | 864  | 193 | 0.06 |
| 15 | 36 | 620  | 201 | 0.07 |
| 17 | 33 | 704  | 191 | 0.08 |
| 21 | 18 | 2232 | 250 | 0.06 |
| 28 | 18 | 2224 | 239 | 0.08 |
| 26 | 11 | 2313 | 228 | 0.08 |
| 30 | 17 | 2472 | 222 | 0.04 |
| 25 | 13 | 2445 | 270 | 0.06 |
| 23 | 17 | 2246 | 229 | 0.08 |
| 24 | 19 | 2134 | 207 | 0.04 |
| 25 | 25 | 1112 | 328 | 0.19 |
| 30 | 31 | 1137 | 307 | 0.14 |
| 30 | 25 | 1159 | 309 | 0.15 |
| 30 | 26 | 1065 | 333 | 0.15 |
| 41 | 29 | 1157 | 302 | 0.12 |
| 16 | 21 | 1172 | 309 | 0.12 |
| 37 | 28 | 1232 | 335 | 0.13 |
| 37 | 28 | 1230 | 359 | 0.12 |
| 47 | 27 | 1314 | 377 | 0.18 |
| 42 | 28 | 1262 | 352 | 0.21 |
| 39 | 29 | 1308 |     | 0.24 |
| 39 | 30 | 1433 | 332 | 0.21 |
| 42 | 34 | 1397 | 319 | 0.22 |
| 56 | 35 | 1584 | 373 | 0.21 |
| 44 | 35 | 1471 | 398 | 0.26 |
| 39 | 35 | 1865 | 407 | 0.29 |
| 57 | 36 | 1936 | 429 | 0.35 |
| 44 | 32 | 1977 | 442 | 0.4  |
| 34 | 25 | 787  | 404 | 0.23 |
| 39 | 27 | 790  | 393 | 0.18 |
| 44 | 25 | 800  | 431 | 0.15 |
| 46 | 24 | 756  | 457 | 0.13 |
| 47 | 27 | 898  | 488 | 0.11 |
| 38 | 23 | 868  | 428 | 0.11 |
| 44 | 26 | 917  | 485 | 0.1  |
| 49 | 26 | 901  | 436 | 0.1  |
| 45 | 23 | 886  | 472 | 0.09 |
| 43 | 24 | 1038 | 484 | 0.08 |
| 54 | 23 | 951  | 476 | 0.1  |
| 28 | 37 | 694  | 359 | 0.29 |
| 30 | 35 | 687  | 342 | 0.28 |
| 21 | 34 | 733  | 377 | 0.19 |

|    |    |      |     |      |
|----|----|------|-----|------|
| 33 | 36 | 673  | 399 | 0.13 |
| 25 | 37 | 707  | 421 | 0.15 |
| 32 | 38 | 704  | 395 | 0.17 |
| 23 | 32 | 751  | 427 | 0.22 |
| 41 | 28 | 769  | 422 | 0.23 |
| 27 | 32 | 826  | 444 | 0.29 |
| 34 | 27 | 847  | 445 | 0.28 |
| 26 | 27 | 949  | 434 | 0.34 |
| 30 | 34 | 1022 | 434 | 0.32 |
| 32 | 35 | 705  | 384 | 0.1  |
| 36 | 30 | 903  | 380 | 0.09 |
| 32 | 31 | 696  | 435 | 0.1  |
| 33 | 29 | 702  | 423 | 0.12 |
| 30 | 32 | 739  | 437 | 0.11 |
| 36 | 33 | 682  | 421 | 0.1  |
| 27 | 37 | 717  | 434 | 0.1  |
| 26 | 35 | 692  | 447 | 0.13 |
| 22 | 36 | 657  | 439 | 0.1  |
| 27 | 33 | 735  | 443 | 0.11 |
| 26 | 34 | 673  | 448 | 0.12 |
| 45 | 24 | 1114 | 468 | 0.47 |
| 49 | 24 | 1127 | 462 | 0.47 |
| 43 | 27 | 1139 | 519 | 0.46 |
| 47 | 16 | 1183 | 507 | 0.35 |
| 49 | 26 | 1020 |     | 0.41 |
| 48 | 22 | 1103 | 317 | 0.44 |
| 48 | 20 | 1111 | 567 | 0.45 |
| 51 | 16 | 1110 | 547 | 0.44 |
| 49 | 31 | 834  | 249 | 0.1  |
| 47 | 26 | 805  | 265 | 0.09 |
| 48 | 41 | 816  | 262 | 0.09 |
| 52 | 40 | 865  | 257 | 0.09 |
| 50 | 44 | 826  | 300 | 0.13 |
| 45 | 41 | 809  | 276 | 0.13 |
| 49 | 42 | 809  | 291 | 0.13 |
| 45 | 44 | 877  | 281 | 0.15 |
| 58 | 40 | 1210 | 315 | 0.24 |
| 51 | 37 | 1222 | 385 | 0.2  |
| 48 | 44 | 1232 | 386 | 0.24 |
| 53 | 38 | 1306 | 365 | 0.26 |
| 52 | 42 | 1210 | 394 | 0.28 |
| 54 | 39 | 1305 | 382 | 0.31 |
| 66 | 31 | 1245 | 381 | 0.31 |
| 68 | 41 | 1313 | 363 |      |
| 45 | 24 | 1142 | 185 | 0.09 |
| 43 | 25 | 1292 | 165 | 0.15 |
| 40 | 32 | 1281 | 138 | 0.2  |
| 47 | 29 | 1290 | 177 | 0.24 |
| 47 | 27 | 1271 | 194 | 0.28 |
| 53 | 29 | 1190 | 187 | 0.28 |
| 49 | 30 | 1291 | 185 | 0.3  |
| 45 | 31 | 1244 | 194 | 0.29 |

|      |    |      |     |      |
|------|----|------|-----|------|
| 28   | 31 | 626  | 280 | 0.16 |
| 32   | 27 | 528  | 242 | 0.15 |
| 39   | 33 | 655  | 288 | 0.15 |
| 44   | 34 | 608  | 302 | 0.18 |
| 32   | 33 | 685  | 292 | 0.18 |
| 33   | 36 | 682  | 298 | 0.16 |
| 41   | 30 | 694  | 351 | 0.16 |
| 34   | 31 | 659  | 302 | 0.17 |
| 17   | 42 | 854  | 256 | 0.15 |
| 28   | 37 | 877  | 261 | 0.16 |
| 33   | 43 | 933  | 273 | 0.19 |
| 32   | 41 | 921  | 280 | 0.13 |
| 32   | 44 | 997  | 295 | 0.11 |
| 24   | 39 | 941  | 276 | 0.25 |
| 30   | 42 | 900  | 289 | 0.27 |
| 24   | 45 | 970  | 309 | 0.34 |
| 26.0 | 45 | 914  | 300 | 0.37 |
| 28   | 46 | 988  | 342 | 0.47 |
| 41   | 47 | 1001 | 357 | 0.54 |
| 35   | 20 | 992  | 252 | 0.13 |
| 39   | 34 | 965  | 234 | 0.18 |
| 33   | 32 | 1100 | 275 | 0.26 |
| 38   | 33 | 1046 | 268 | 0.26 |
| 41   | 30 | 1124 | 269 | 0.28 |
| 38   | 34 | 1088 | 287 | 0.31 |
| 38   | 32 | 1114 | 286 | 0.35 |
| 37   | 35 | 1137 | 321 | 0.4  |
| 39   | 35 | 1174 | 309 | 0.44 |
| 43   | 38 | 1193 | 332 | 0.46 |
| 42   | 37 | 1250 | 364 | 0.5  |
| 45   | 37 | 1434 | 400 | 0.53 |
| 26   | 23 | 912  | 275 | 0.12 |
| 36   | 16 | 967  | 273 | 0.11 |
| 28   | 17 | 999  | 309 | 0.17 |
| 33   | 26 | 1030 | 332 | 0.18 |
| 35   | 24 | 985  | 344 | 0.25 |
| 32   | 24 | 1069 | 321 | 0.26 |
| 34   | 23 | 1029 | 337 | 0.27 |
| 37   | 24 | 1146 | 361 | 0.3  |
| 34   | 20 | 1172 | 394 | 0.33 |
| 36   | 25 | 1133 | 373 | 0.4  |
| 37   | 23 | 1178 | 415 | 0.4  |
| 27   | 21 | 1044 | 323 | 0.22 |
| 24   | 27 | 893  | 297 | 0.33 |
| 24   | 34 | 960  | 308 | 0.33 |
| 27   | 33 | 1072 | 314 | 0.28 |
| 21.7 | 34 | 1050 | 353 | 0.36 |
| 29   | 38 | 1107 | 355 | 0.57 |
| 22   | 40 | 1125 | 355 | 0.63 |
| 35   | 42 | 1208 | 276 | 0.33 |
| 32   | 39 | 1119 | 389 | 0.77 |
| 26   | 36 | 1117 | 376 | 0.87 |

|    |    |      |       |       |
|----|----|------|-------|-------|
| 25 | 44 | 1158 | 420   | 0.87  |
| 28 | 37 | 1169 | 373   | 0.85  |
| 30 | 39 | 1203 | 404   | 0.92  |
| 30 | 17 | 2091 | 203   | 0.2   |
| 29 | 19 | 2155 | 214   | 0.27  |
| 29 | 23 | 2287 | 245   | 0.27  |
| 30 | 23 | 2424 | 256   | 0.34  |
| 29 | 24 | 2587 | 267   | 0.37  |
| 34 | 23 | 2484 | 286   | 0.44  |
| 29 | 26 | 2584 | 279   | 0.48  |
| 32 | 20 | 2663 | 259   | 0.53  |
| 37 | 22 | 2482 | 299   |       |
| 35 | 22 | 2707 | 309   |       |
| 36 | 23 | 2791 | 329   |       |
|    | 22 | 2669 | 327   |       |
| 33 | 30 | 829  | 341   | 0.21  |
| 30 | 30 | 864  | 369   | 0.27  |
| 30 | 35 | 848  | 387   | 0.41  |
| 44 | 35 | 878  | 489   |       |
| 24 | 35 | 878  | 425   |       |
| 28 | 35 | 869  | 458   | 0.4   |
| 27 | 38 | 798  | 403   | 0.39  |
| 38 | 38 | 1056 | 468   |       |
| 22 | 27 | 1025 | 337   | 0.22  |
| 23 | 40 | 961  | 316   | 0.37  |
| 24 | 38 | 901  | 291   | 0.33  |
| 22 | 32 | 902  | 289   |       |
| 24 | 33 | 894  | 322   | 0.38  |
| 26 | 37 | 919  | 361   | 0.29  |
| 22 | 31 | 1177 | 339   | 0.39  |
| 28 | 17 | 2155 | 287   | 0.13  |
| 32 | 22 | 2206 | 388   | 0.3   |
| 26 | 29 | 2185 | 379   | 0.2   |
| 24 | 27 | 2307 | 421   | 0.37  |
| 29 | 23 | 2278 | 417   | 0.42  |
| 29 | 31 | 2271 | 438   | 0.4   |
| 32 | 23 | 2290 | 426   | 0.37  |
| 26 | 42 | 954  | 380.7 | 0.209 |
| 26 | 21 | 1073 | 329   | 0.34  |
| 31 | 23 | 1118 | 338   | 0.38  |
| 32 | 23 | 1153 | 350   | 0.47  |
| 40 | 29 | 1214 | 367   | 0.57  |
| 27 | 31 | 1182 | 398   | 0.62  |
| 37 | 24 | 1187 | 390   | 0.61  |
| 35 | 22 | 1144 | 425   | 0.57  |
| 38 | 29 |      | 441   | 0.33  |
| 36 | 24 | 1199 | 446   | 0.56  |
| 26 | 33 | 2667 | 416   | 0.53  |
| 29 | 29 | 2452 | 441   | 0.55  |
| 38 | 38 | 2746 | 546   | 0.63  |
| 31 | 33 | 2783 | 527   | 0.65  |
| 33 | 31 | 3161 | 561   | 0.73  |



|       |    |      |     |      |
|-------|----|------|-----|------|
| 38    | 34 | 2965 | 581 | 0.76 |
| 39    | 32 | 3518 | 652 | 0.79 |
| 57    | 36 |      | 611 | 0.74 |
| 1.48  | 39 | 912  | 223 | 0.64 |
| 15    | 41 | 907  | 240 | 0.73 |
| 12    | 43 | 989  | 238 | 0.75 |
| 6     | 22 | 894  |     | 0.49 |
| 5.55  | 45 | 987  | 253 | 0.83 |
| 10    | 47 | 1031 | 255 | 0.84 |
| 12    | 49 | 955  | 283 | 0.83 |
| 20    | 46 | 1048 | 294 | 0.8  |
| 12    | 46 | 968  | 326 | 0.74 |
| 7     | 51 | 1097 | 306 | 0.7  |
| 39    | 33 | 1405 | 445 | 0.31 |
| 44    | 28 | 1603 | 495 | 0.43 |
| 42    | 33 | 1445 | 507 | 0.46 |
| 33    | 44 | 1353 | 538 | 0.43 |
| 34    | 35 | 1420 | 579 | 0.4  |
| 45    | 39 | 1499 | 638 | 0.5  |
| 29    | 27 | 1032 | 269 | 0.16 |
| 12    |    | 1236 | 269 | 0.24 |
| 32    | 22 | 1186 | 302 | 0.09 |
| 31    | 20 | 1211 | 348 | 0.05 |
| 44    | 21 | 1043 | 346 | 0.13 |
| 33    | 25 | 1080 | 353 | 0.15 |
| 38    | 34 | 1045 | 359 | 0.17 |
| 35    | 22 | 1153 | 376 | 0.23 |
| 34    | 23 | 1205 | 414 | 0.24 |
| 40    | 22 | 1483 | 440 | 0.27 |
| 37    | 25 | 1225 | 403 | 0.28 |
| 35    | 28 | 1281 | 482 | 0.31 |
| 29    | 41 | 706  | 231 | 0.66 |
| 19    | 46 | 653  | 219 | 0.67 |
| 18    | 37 | 713  | 234 | 0.88 |
| 21    | 34 | 685  | 237 | 0.92 |
| 21    | 37 | 719  | 235 | 0.8  |
| 22    | 38 | 688  | 240 | 0.89 |
| 18    | 41 | 720  | 254 | 0.96 |
| 23    | 41 | 746  | 239 | 1.1  |
| 26    | 50 | 743  | 269 | 1.12 |
| 23    | 41 | 788  | 280 | 1.14 |
| 14.2  | 44 | 792  | 244 | 1.01 |
| 18    | 45 | 820  | 245 | 1.15 |
| 13    | 38 | 783  | 438 | 0.24 |
| 26    | 36 | 808  | 424 | 0.21 |
| 22    | 40 | 899  | 448 | 0.25 |
| 20    | 38 | 858  | 480 | 0.31 |
| 15    | 40 | 907  | 470 | 0.33 |
| 14.37 | 45 | 912  | 537 | 0.36 |
| 19    | 42 | 887  | 526 | 0.4  |

|    |    |      |     |      |
|----|----|------|-----|------|
| 32 | 36 | 967  | 531 | 0.37 |
| 19 | 40 | 1088 | 571 | 0.45 |
| 20 | 37 | 1020 | 592 | 0.46 |
| 35 | 38 | 997  | 595 | 0.48 |
| 20 | 52 | 1368 | 327 | 0.3  |
| 16 | 45 | 1102 | 303 | 0.28 |
| 12 | 39 | 1066 | 298 | 0.28 |
|    | 46 | 1159 | 310 | 0.17 |
| 13 | 49 | 1071 | 292 | 0.17 |
| 16 | 50 | 1114 | 319 | 0.19 |
| 23 | 45 | 927  |     | 0.22 |
| 27 | 29 | 1006 | 293 | 0.21 |
| 28 | 37 | 916  | 292 | 0.24 |
| 23 | 34 | 920  | 292 | 0.27 |
| 29 | 27 | 838  | 307 | 0.12 |
| 30 | 34 | 910  | 323 | 0.22 |
| 27 | 53 | 1008 | 227 | 0.1  |
| 29 | 43 | 1044 | 237 | 0.02 |
| 32 | 51 | 942  | 274 | 0.08 |
| 33 | 46 | 935  | 249 | 0.09 |
| 27 | 50 | 978  | 259 | 0.19 |
| 27 | 50 | 823  | 221 | 0.15 |
| 17 | 35 | 1152 | 218 | 0.14 |
| 22 | 30 | 1135 | 184 | 0.35 |
| 15 | 33 | 992  | 218 | 0.21 |
| 18 | 21 | 1185 | 174 | 0.09 |
| 21 | 24 | 1109 | 179 | 0.13 |
| 19 | 29 | 978  | 195 | 0.19 |
| 31 | 45 | 2115 | 272 | 0.21 |
| 29 | 44 | 1911 | 354 | 0.36 |
| 29 | 37 | 1756 | 339 | 0.35 |
| 33 | 43 | 2086 | 317 | 0.33 |
| 37 | 41 | 1959 | 373 | 0.4  |
| 32 | 43 | 2059 | 312 | 0.39 |
| 33 | 37 | 1938 | 440 | 0.43 |
| 37 | 40 | 1934 |     | 0.52 |
| 35 | 26 | 643  | 301 | 0.3  |
| 28 | 25 | 631  | 303 | 0.3  |
| 27 | 25 | 588  | 324 | 0.34 |
| 30 | 23 | 638  | 338 | 0.25 |
| 47 | 25 | 1224 | 319 | 0.17 |
| 27 | 27 | 645  | 318 | 0.26 |
| 33 | 28 | 643  | 341 |      |
| 32 | 29 | 855  | 319 | 0.2  |
|    | 28 | 1490 | 329 | 0.15 |
| 35 | 28 |      | 308 | 0.12 |
| 41 | 33 |      | 313 | 0.09 |
| 37 | 25 |      | 303 | 0.05 |
| 37 | 39 | 805  | 301 | 0.15 |
| 32 | 35 | 896  | 341 | 0.24 |

|    |    |      |     |      |
|----|----|------|-----|------|
| 35 | 31 | 912  | 349 | 0.31 |
| 35 | 38 | 912  | 394 | 0.27 |
| 38 | 27 | 908  | 355 | 0.37 |
| 32 | 39 | 865  | 370 | 0.32 |
| 39 | 37 | 860  | 374 | 0.31 |
| 36 | 37 | 849  | 401 | 0.3  |
| 33 | 34 | 866  | 391 | 0.27 |
| 33 | 35 | 903  | 401 | 0.26 |
| 30 | 36 | 939  | 410 | 0.34 |
| 32 | 37 | 910  | 427 | 0.42 |
| 22 | 26 | 652  | 261 | 0.21 |
| 21 | 30 | 663  | 242 | 0.19 |
| 20 | 31 | 640  | 263 | 0.16 |
| 32 | 33 | 715  | 253 | 0.14 |
| 26 | 29 | 704  | 246 | 0.11 |
| 26 | 33 | 647  | 232 | 0.1  |
| 28 | 30 | 683  | 233 | 0.09 |
| 25 | 27 | 735  | 227 | 0.08 |
| 18 | 29 | 710  | 231 | 0.09 |
| 22 | 28 | 763  | 226 | 0.07 |
| 25 | 26 | 792  | 229 | 0.08 |
| 31 | 26 | 805  | 368 | 0.24 |
| 19 | 41 | 730  | 358 | 0.21 |
| 34 | 20 | 756  | 357 | 0.2  |
| 32 | 29 | 670  | 367 | 0.16 |
| 29 | 28 | 762  | 377 | 0.15 |
| 35 | 20 | 756  | 361 | 0.14 |
| 33 | 28 | 753  | 392 | 0.16 |
| 36 | 29 | 741  | 344 | 0.16 |
| 32 | 16 | 774  | 381 | 0.16 |
| 34 | 19 | 771  | 366 | 0.18 |
| 31 | 22 | 803  | 375 | 0.19 |
| 50 | 20 | 1515 | 449 | 0.46 |
| 56 | 25 |      | 445 | 0.48 |
| 49 | 21 | 1248 | 415 | 0.44 |
| 65 | 25 | 1254 | 397 | 0.44 |
| 46 | 21 | 1478 | 431 | 0.31 |
| 54 | 21 | 1267 | 417 | 0.33 |
| 54 | 29 | 1275 | 412 | 0.33 |
| 53 | 21 | 1352 | 428 | 0.42 |
| 69 | 47 | 1025 | 432 | 0.3  |
| 68 | 51 | 972  | 463 | 0.39 |
| 55 | 46 | 1026 | 471 | 0.45 |
| 54 | 54 | 1011 | 485 | 0.51 |
| 56 | 43 | 1000 | 407 | 0.28 |
| 71 | 42 | 1044 | 393 | 0.3  |
| 68 | 50 | 1020 | 350 | 0.26 |
| 53 | 43 | 1004 | 358 | 0.21 |
| 43 | 32 | 3014 | 327 | 0.22 |
| 46 | 40 | 3061 | 315 | 0.45 |
| 62 |    |      |     |      |

|          |          |          |           |                         |
|----------|----------|----------|-----------|-------------------------|
| 43       | 35       | 3199     | 344       | 0.23                    |
| 36       | 36       | 3116     | 294       | 0.26                    |
| 35       | 36       | 3196     | 299       | 0.38                    |
| 42       | 28       | 3438     | 300       | 0.4                     |
| 42       | 38       | 3012     | 325       | 0.34                    |
| 30       | 45       | 893      | 291       | 0.24                    |
| 34       | 39       | 907      | 313       | 0.26                    |
| 33       | 46       | 927      | 311       | 0.31                    |
| 26       | 51       | 867      | 350       | 0.31                    |
| 35       | 48       | 879      | 352       | 0.37                    |
| 36       | 49       | 880      | 354       | 0.38                    |
| 35       | 46       | 865      | 319       | 0.38                    |
| 38       | 50       | 926      | 350       | 0.44                    |
| 14       | 33       | 814      | 309       | 0.23                    |
| 22       | 41       | 821      | 341       | 0.26                    |
| 28       | 51       | 850      | 339       | 0.27                    |
| 24       | 42       | 809      | 333       | 0.3                     |
| 30       | 42       | 878      | 365       | 0.29                    |
| 32       | 41       | 882      | 393       | 0.31                    |
| 38       | 39       | 905      | 402       | 0.31                    |
| 25       | 40       | 898      | 370       | 0.28                    |
| ALT(U/I) | GGT(U/L) | LDH(U/L) | ALP (U/L) | TOTAL BILIRUBIN (mg/dl) |

TOTAL BILIRUBIN (umol/L) Lipase U/L

|      |     |
|------|-----|
| 1.71 | 3.8 |
| 1.37 | 4.1 |
| 1.03 | 3.6 |
| 0.86 | 3.3 |
| 0.86 | 2.4 |
| 0.68 | 3.5 |
| 1.03 | 3   |
| 3.59 | 2.3 |
| 5.47 | 3.2 |
| 5.99 | 3   |
| 7.70 | 3   |
| 7.01 | 2.9 |
| 7.70 | 3.3 |
| 5.47 | 3   |
| 5.81 | 4   |
| 5.13 | 4.2 |
| 5.30 | 4.6 |
| 5.13 | 3.6 |
| 4.96 | 3.8 |
| 6.16 | 4.5 |
| 5.47 | 3.6 |
| 4.28 | 3.6 |
| 3.42 | 3.7 |
| 5.64 | 3.6 |
| 3.42 | 4   |
| 3.08 | 4.1 |
| 2.57 | 3.4 |
| 2.74 | 3.7 |
| 5.13 | 4.1 |
| 8.04 | 4.2 |
| 6.33 | 3.7 |
| 8.38 | 4.7 |
| 8.38 | 3.5 |
| 8.04 | 4.8 |
| 7.35 | 4   |
| 1.03 | 6.6 |
| 1.20 | 5.4 |
| 0.68 | 5.7 |
| 0.17 | 6   |
| 0.17 | 6.9 |
| 1.03 | 6.5 |
| 1.03 | 7   |
| 2.05 | 5.9 |
| 1.54 | 6.7 |
| 1.88 | 7.5 |
| 1.88 | 6.8 |
| 2.05 | 8.4 |
| 2.39 | 6.6 |
| 1.20 | 7.3 |
| 1.71 | 6.2 |
| 1.71 | 6.8 |

|      |      |
|------|------|
| 1.54 | 6.3  |
| 0.34 | 5.4  |
| 0.00 | 6.5  |
| 0.34 | 6.9  |
| 0.51 | 7    |
| 1.37 | 8.7  |
| 1.54 | 9.4  |
| 2.05 | 8    |
| 1.88 | 7    |
| 1.03 | 6.4  |
| 1.20 | 6.6  |
| 1.37 | 7.7  |
| 1.03 | 10.9 |
| 1.37 | 10.7 |
| 1.37 | 5.8  |
| 0.68 | 10   |
| 1.03 | 10.6 |
| 1.37 | 5.59 |
| 0.68 | 10.4 |
| 3.25 | 4.1  |
| 2.39 | 4.2  |
| 2.57 | 3.9  |
| 2.57 | 4.3  |
| 2.05 | 4.4  |
| 2.05 | 4.3  |
| 2.22 | 4.6  |
| 2.05 | 4.7  |
| 3.08 | 4.3  |
| 3.59 | 3.8  |
| 4.10 | 2.69 |
| 3.59 | 5.7  |
| 3.76 | 5.4  |
| 3.59 | 5.5  |
| 4.45 | 6    |
| 4.96 | 6.4  |
| 5.99 | 7.7  |
| 6.84 | 10.2 |
| 3.93 | 4.6  |
| 3.08 | 4.1  |
| 2.57 | 4.6  |
| 2.22 | 4.7  |
| 1.88 | 4.8  |
| 1.88 | 4.5  |
| 1.71 | 5.2  |
| 1.71 | 5.1  |
| 1.54 | 4.9  |
| 1.37 | 5.1  |
| 1.71 | 5.1  |
| 4.96 | 4.7  |
| 4.79 | 4.9  |
| 3.25 | 5.4  |

|      |      |
|------|------|
| 2.22 | 5.2  |
| 2.57 | 5.5  |
| 2.91 | 5.6  |
| 3.76 | 6.1  |
| 3.93 | 5.5  |
| 4.96 | 5.7  |
| 4.79 | 6.2  |
| 5.81 | 6.5  |
| 5.47 | 6.2  |
| 1.71 | 6.4  |
| 1.54 | 5.5  |
| 1.71 | 5.7  |
| 2.05 | 5.9  |
| 1.88 | 6.1  |
| 1.71 | 5.4  |
| 1.71 | 5.1  |
| 2.22 | 6    |
| 1.71 | 6    |
| 1.88 | 6.3  |
| 2.05 | 6.1  |
| 8.04 | 5.1  |
| 8.04 | 4.7  |
| 7.87 | 5.4  |
| 5.99 | 11.3 |
| 7.01 | 7.1  |
| 7.52 | 12.2 |
| 7.70 | 11.7 |
| 7.52 | 9.5  |
| 1.71 | 6.9  |
| 1.54 | 7.9  |
| 1.54 | 6.3  |
| 1.54 | 6.9  |
| 2.22 | 6.8  |
| 2.22 | 7.8  |
| 2.22 | 7    |
| 2.57 | 6.7  |
| 4.10 | 6.6  |
| 3.42 | 8.3  |
| 4.10 | 8.2  |
| 4.45 | 14   |
| 4.79 | 13.7 |
| 5.30 | 13.1 |
| 5.30 | 12.1 |
| 0.00 | 13.3 |
| 1.54 | 8.2  |
| 2.57 | 7    |
| 3.42 | 3    |
| 4.10 | 7.1  |
| 4.79 | 7.5  |
| 4.79 | 7.8  |
| 5.13 | 8.4  |
| 4.96 | 8.4  |

|       |       |
|-------|-------|
| 2.74  | 5     |
| 2.57  | 5     |
| 2.57  | 5.1   |
| 3.08  | 5.2   |
| 3.08  | 5.5   |
| 2.74  | 5.5   |
| 2.74  | 5.4   |
| 2.91  | 6.1   |
| 2.57  | 4     |
| 2.74  | 4.9   |
| 3.25  | 5.1   |
| 2.22  | 5.4   |
| 1.88  | 6.6   |
| 4.28  | 5.9   |
| 4.62  | 5.9   |
| 5.81  | 6.031 |
| 6.33  | 4.8   |
| 8.04  | 6.9   |
| 9.23  | 8.7   |
| 2.22  | 8.4   |
| 3.08  | 9.7   |
| 4.45  | 10.4  |
| 4.45  | 11.3  |
| 4.79  | 12.1  |
| 5.30  | 12.9  |
| 5.99  | 14.9  |
| 6.84  | 18.4  |
| 7.52  | 19.4  |
| 7.87  | 23.9  |
| 8.55  | 30.3  |
| 9.06  | 34.4  |
| 2.05  | 13.7  |
| 1.88  | 12.3  |
| 2.91  | 12.9  |
| 3.08  | 13.6  |
| 4.28  | 15.8  |
| 4.45  | 17.1  |
| 4.62  | 19.1  |
| 5.13  | 20.4  |
| 5.64  | 24.1  |
| 6.84  | 28.7  |
| 6.84  | 31.8  |
| 3.76  | 15    |
| 5.64  | 6.1   |
| 5.64  | 6.6   |
| 4.79  | 7     |
| 6.16  | 7.6   |
| 9.75  | 7.9   |
| 10.77 | 7.2   |
| 5.64  | 5.8   |
| 13.17 | 6.6   |
| 14.88 | 7.1   |



|       |       |
|-------|-------|
| 14.88 | 6.6   |
| 14.54 | 6.9   |
| 15.73 | 8.7   |
| 3.42  | 5.4   |
| 4.62  | 4.8   |
| 4.62  | 5.6   |
| 5.81  | 5.7   |
| 6.33  | 5.8   |
| 7.52  | 6.4   |
| 8.21  | 6.5   |
| 9.06  | 7.3   |
| 0.00  | 8.6   |
| 0.00  | 11.1  |
| 0.00  | 14.8  |
| 0.00  | 13.5  |
| 3.59  | 7.8   |
| 4.62  | 8.6   |
| 7.01  | 7.8   |
| 0.17  | 10.8  |
| 0.00  | 9.5   |
| 6.84  | 10    |
| 6.67  | 8.4   |
| 0.00  | 10.2  |
| 3.76  | 6     |
| 6.33  | 8.2   |
| 5.64  | 9.6   |
| 0.00  | 6.2   |
| 6.50  | 7.7   |
| 4.96  |       |
| 6.67  |       |
| 2.22  | 6.3   |
| 5.13  | 7.8   |
| 3.42  | 7.5   |
| 6.33  | 8.7   |
| 7.18  | 9.3   |
| 6.84  | 14.6  |
| 6.33  | 19.2  |
| 3.57  | 15.22 |
| 5.81  | 22.9  |
| 6.50  | 14.2  |
| 8.04  | 11.5  |
| 9.75  | 9.7   |
| 10.60 | 8.5   |
| 10.43 | 8.8   |
| 9.75  | 2.82  |
| 5.64  | 24.5  |
| 9.58  | 10.7  |
| 9.06  | 16.5  |
| 9.41  | 16.7  |
| 10.77 | 20.1  |
| 11.12 | 18.9  |
| 12.48 | 19.2  |

|       |      |
|-------|------|
| 13.00 | 20.9 |
| 13.51 | 24.9 |
| 12.65 | 30.6 |
| 10.94 | 9.3  |
| 12.48 | 9.1  |
| 12.83 | 8.8  |
| 8.38  | 6.8  |
| 14.19 | 8.5  |
| 14.36 | 8.9  |
| 14.19 | 10.5 |
| 13.68 | 11.1 |
| 12.65 | 9.7  |
| 11.97 | 10.5 |
| 5.30  | 4.8  |
| 7.35  | 4.5  |
| 7.87  | 4.1  |
| 7.35  | 5.3  |
| 6.84  | 6.6  |
| 8.55  | 6.3  |
| 2.74  | 4.6  |
| 4.10  | 3.1  |
| 1.54  | 7.1  |
| 0.86  | 7.6  |
| 17.10 | 7.8  |
| 2.57  |      |
| 2.91  |      |
| 3.93  | 8.5  |
| 4.10  | 10   |
| 4.62  | 22.8 |
| 4.79  | 14.4 |
| 5.30  | 20.7 |
| 11.29 | 5.5  |
| 11.46 | 3.9  |
| 15.05 | 6.1  |
| 15.73 | 5.8  |
| 13.68 | 5.6  |
| 15.22 | 5.5  |
| 16.42 | 6    |
| 18.81 | 6.2  |
| 19.15 | 3.5  |
| 19.49 | 6    |
| 17.27 | 6.6  |
| 19.67 | 5.8  |
| 4.10  | 6.6  |
| 3.59  | 6.7  |
| 4.28  | 7.3  |
| 5.30  | 7.3  |
| 5.64  | 7.2  |
| 6.16  | 9.1  |
| 6.84  | 9.5  |

|      |      |
|------|------|
| 6.33 | 13.8 |
| 7.70 | 24   |
| 7.87 |      |
| 8.21 |      |
| 5.13 | 6.9  |
| 4.79 | 8    |
| 4.79 | 8    |
| 2.91 | 8.9  |
| 2.91 | 8.2  |
| 3.25 | 7.6  |
| 3.76 | 5.5  |
| 3.59 | 6.8  |
| 4.10 | 7    |
| 4.62 | 7.9  |
| 2.05 | 9.4  |
| 3.76 | 10.6 |
| 1.71 | 6.1  |
| 0.34 | 6.8  |
| 1.37 | 6.6  |
| 1.54 | 5.8  |
| 3.25 | 9.3  |
| 2.57 | 7.1  |
| 2.39 | 9.7  |
| 5.99 | 6    |
| 3.59 | 8.1  |
| 1.54 | 7.3  |
| 2.22 | 7.3  |
| 3.25 | 7.2  |
| 3.59 | 6.1  |
| 6.16 | 6.5  |
| 5.99 | 6.4  |
| 5.64 | 6.3  |
| 6.84 | 6.3  |
| 6.67 | 6.6  |
| 7.35 | 6.2  |
| 8.89 | 7.3  |
| 5.13 | 7.3  |
| 5.13 | 7.5  |
| 5.81 | 7.5  |
| 4.28 | 6.4  |
| 2.91 | 6.7  |
| 4.45 | 7    |
| 0.00 | 6.6  |
| 3.42 | 6.8  |
| 2.57 | 6.3  |
| 2.05 | 7.7  |
| 1.54 | 8.4  |
| 0.86 | 8.8  |
| 2.57 | 15.9 |
| 4.10 | 16.5 |

|      |      |
|------|------|
| 5.30 | 18.6 |
| 4.62 | 18.4 |
| 6.33 | 19.4 |
| 5.47 | 20.3 |
| 5.30 | 26.3 |
| 5.13 | 28   |
| 4.62 | 28.7 |
| 4.45 | 30.9 |
| 5.81 | 32   |
| 7.18 | 33.6 |
| 3.59 | 5.7  |
| 3.25 | 6    |
| 2.74 | 6.4  |
| 2.39 | 6.3  |
| 1.88 | 7.3  |
| 1.71 | 6.5  |
| 1.54 | 6.7  |
| 1.37 | 12.4 |
| 1.54 | 8.1  |
| 1.20 | 8.2  |
| 1.37 | 8.5  |
| 4.10 | 7.2  |
| 3.59 | 6.7  |
| 3.42 | 7    |
| 2.74 | 6.4  |
| 2.57 | 6.3  |
| 2.39 | 6.1  |
| 2.74 | 7    |
| 2.74 | 6.4  |
| 2.74 | 7    |
| 3.08 | 7.2  |
| 3.25 | 6.4  |
| 7.87 | 9.7  |
| 8.21 | 9.8  |
| 7.52 | 10.8 |
| 7.52 | 10   |
| 5.30 | 12.8 |
| 5.64 | 10.3 |
| 5.64 | 11.7 |
| 7.18 | 9.8  |
| 5.13 | 8.9  |
| 6.67 | 9    |
| 7.70 | 11.6 |
| 8.72 | 14.7 |
| 4.79 | 8.5  |
| 5.13 | 8.3  |
| 4.45 | 7.5  |
| 3.59 | 8    |
| 3.76 | 14.8 |
| 7.70 | 14.6 |
| 0.68 | 7    |

|      |      |
|------|------|
| 3.93 | 15.4 |
| 4.45 | 13   |
| 6.50 | 16.3 |
| 6.84 | 11.7 |
| 5.81 | 12.1 |
| 4.10 | 9.1  |
| 4.45 | 9.8  |
| 5.30 | 10.5 |
| 5.30 | 10.9 |
| 6.33 | 11.1 |
| 6.50 | 9.2  |
| 6.50 | 11.5 |
| 7.52 | 11.5 |
| 3.93 | 6    |
| 4.45 | 6.8  |
| 4.62 | 11.7 |
| 5.13 | 10.9 |
| 4.96 | 14.4 |
| 5.30 | 16.7 |
| 5.30 | 17.8 |
| 4.79 | 16.1 |

TOTAL BILIRUBIN (umol/L) Lipase U/L
