# Supplementary material for: The pathophysiological impact of intra-abdominal hypertension in pigs
Source: PubMed Central journal article supplement (PMC10461824; doi:10.1371/journal.pone.0290451), 2023-08-28
Supplement: pone.0290451.s002.pdf [file pone.0290451.s002.pdf]

## Electronic supplementary media

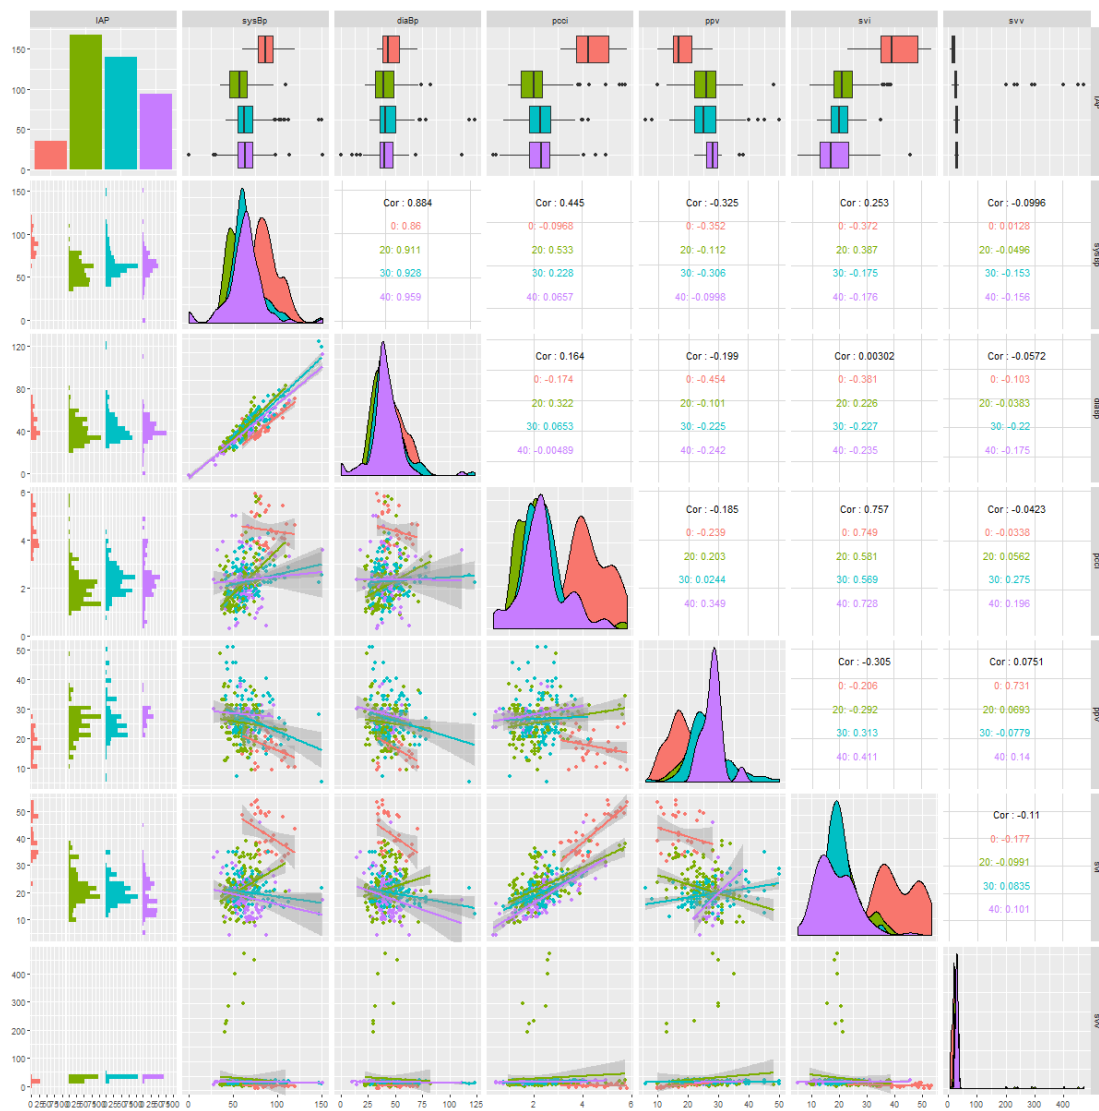

Figure S1. Composite matrix plot of key cardiovascular variables and comparison of pathophysiological effects at different IAP.

IAP = intra-abdominal pressure; sysBP = systolic blood pressure; diaBP = diastolic blood pressure; pcci = cardiac index; ppv = pulse pressure variation; svi = stroke volume index; svv = stroke volume variation

- = Control
- = Intra-abdominal pressure 20mmHg
- = Intra-abdominal pressure 30mmHg
- = Intra-abdominal pressure 40mmHg

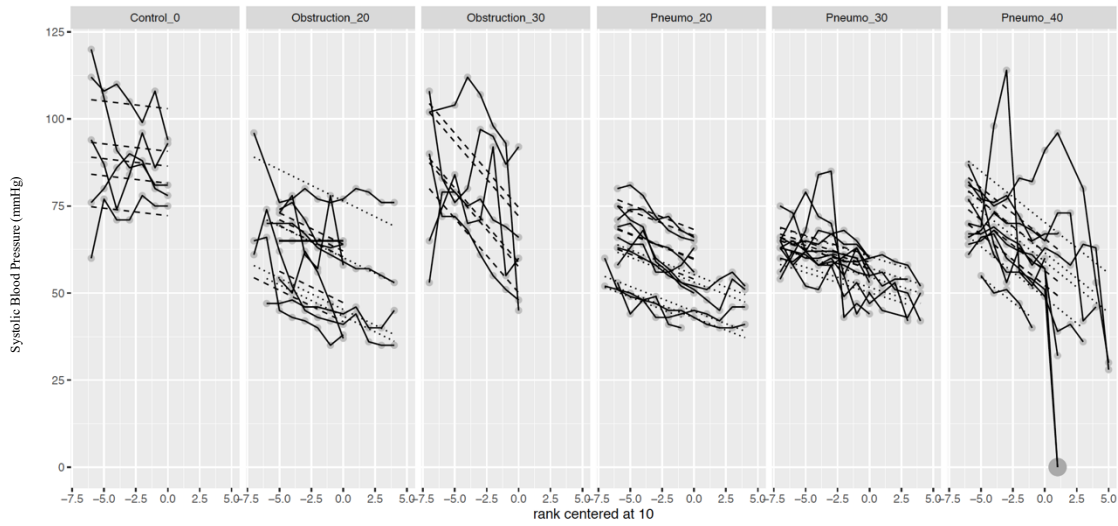

Figure S2. Scatter plot of systolic blood pressure variables. Note: Large dot in Pn40 group indicates the pig that died.

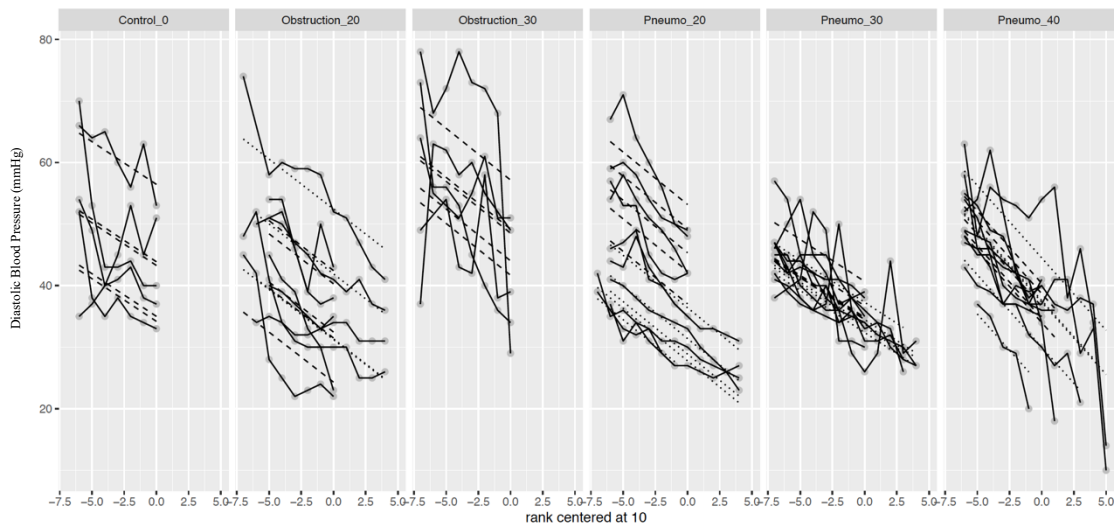

Figure S3. Scatter plot of diastolic blood pressure variables.

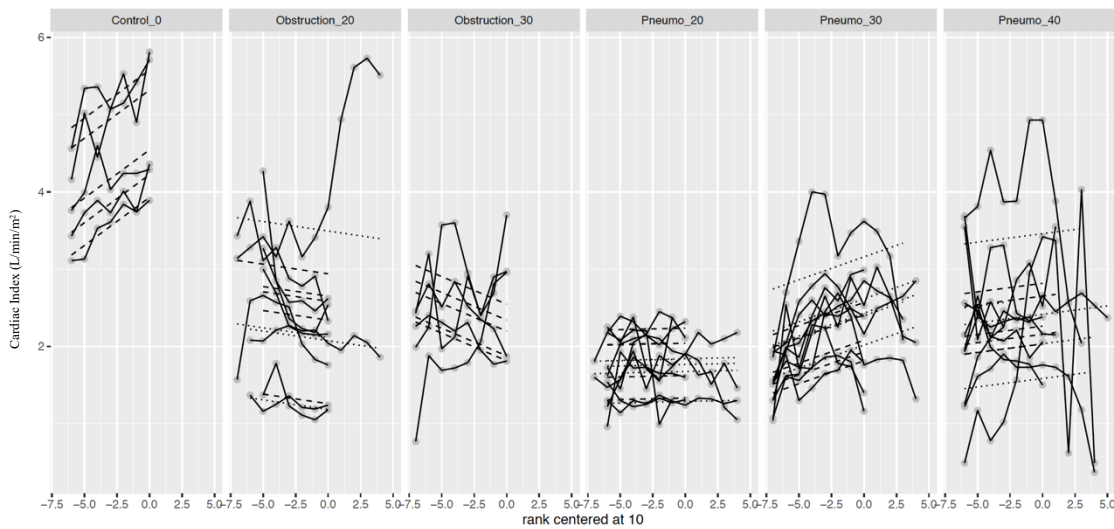

Figure S4. Scatter plot of cardiac index variables.

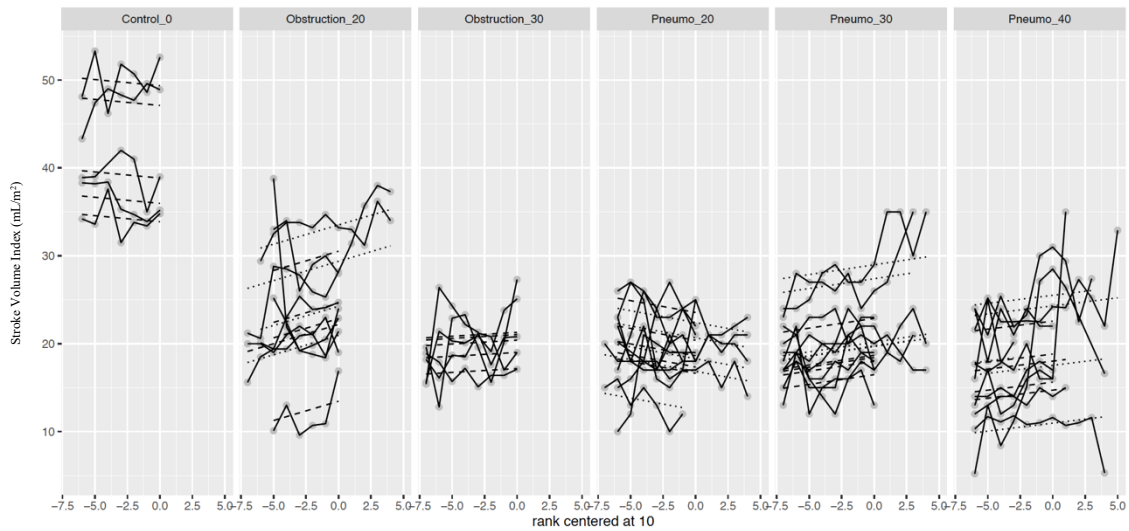

Figure S5. Scatter plot of stroke volume index variables.

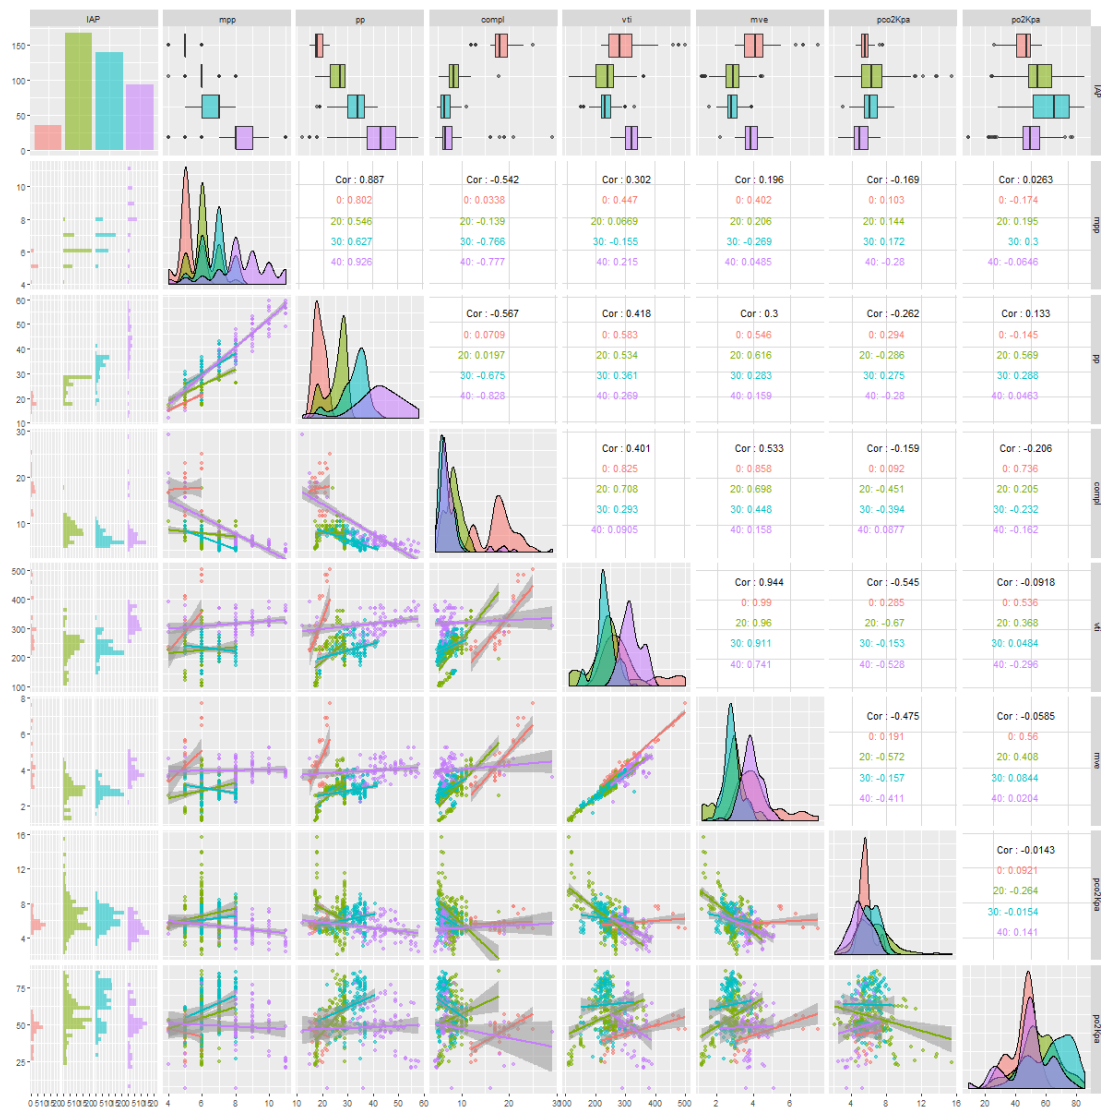

Figure S6. Composite matrix plot of respiratory variables and comparison of pathophysiological effects at different IAP.

IAP = intra-abdominal pressure; mpp = mean pulmonary airway pressure; pp = plateau pressure; compl = compliance; vti = inspiratory tidal volume index; mve = expiratory minute ventilation; pCO<sub>2</sub>kPa = partial pressure of carbon dioxide; pO<sub>2</sub>kPa = partial pressure of oxygen

- = Control
- = *Intra-abdominal pressure 20mmHg*
- = *Intra-abdominal pressure 30mmHg*
- = *Intra-abdominal pressure 40mmHg*

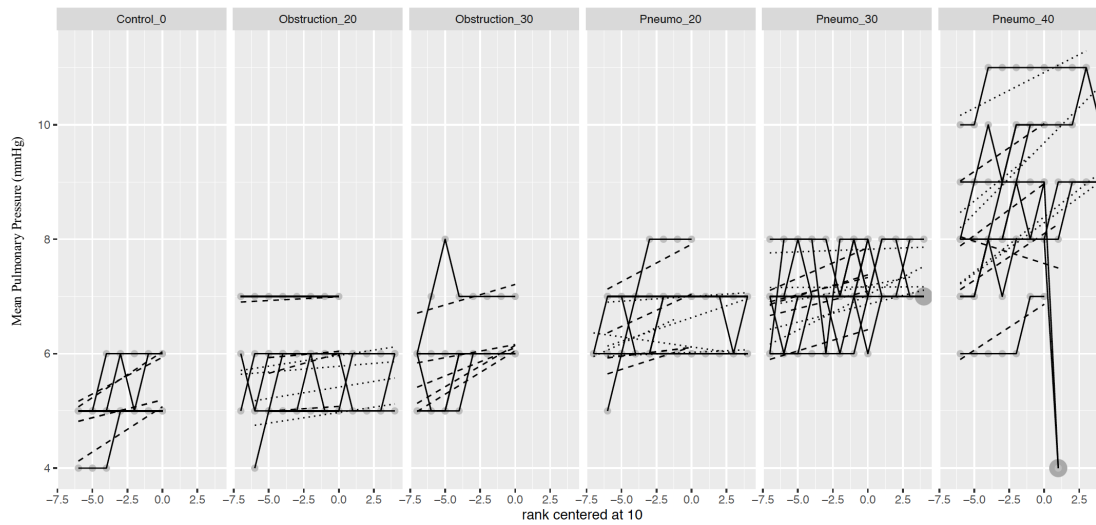

Figure S7. Scatter plot of mean pulmonary pressure variables.

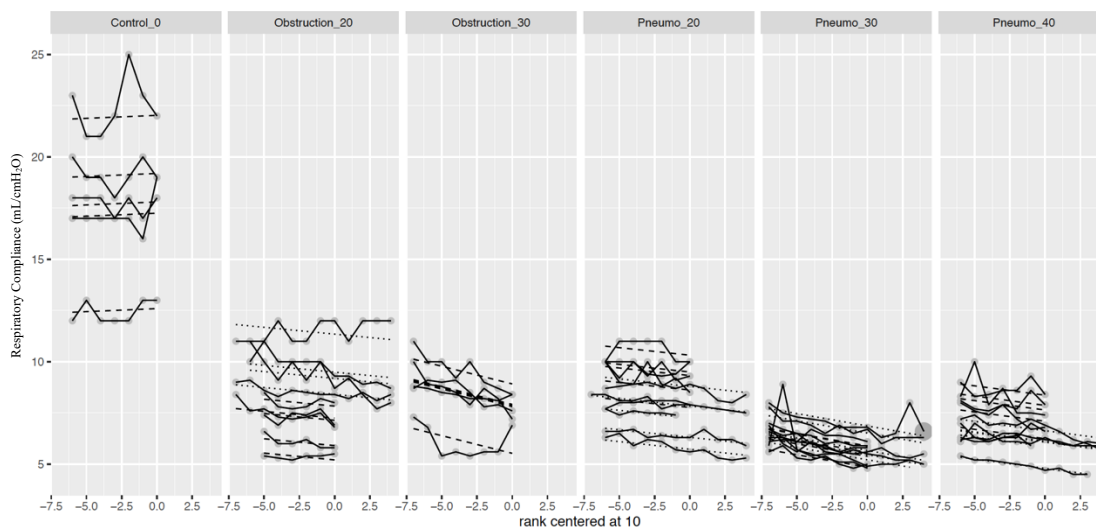

Figure S8. Scatter plot of dynamic respiratory compliance.

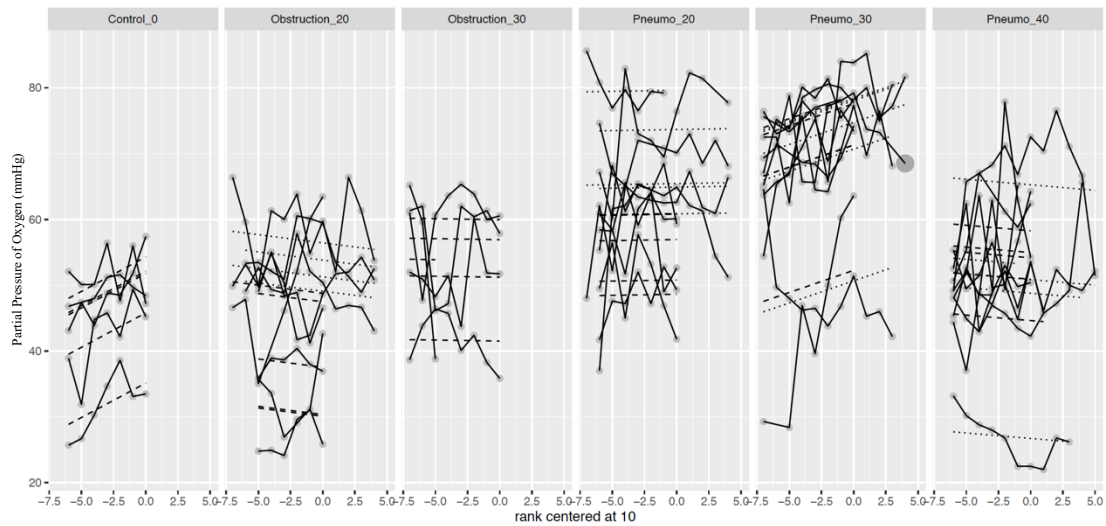

Figure S9. Scatter plot of partial pressure of oxygen.

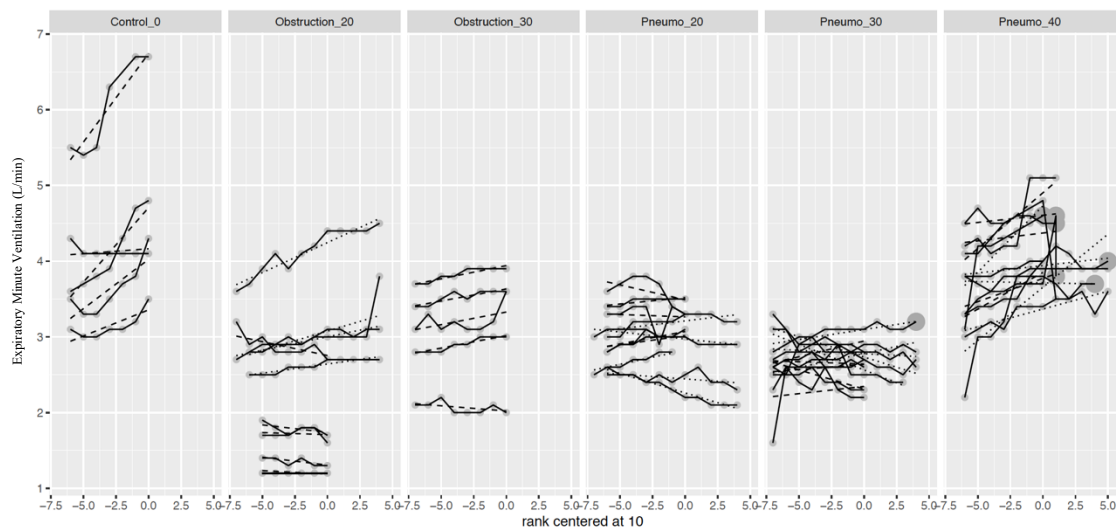

Figure S10. Scatter plot of expiratory minute volume.

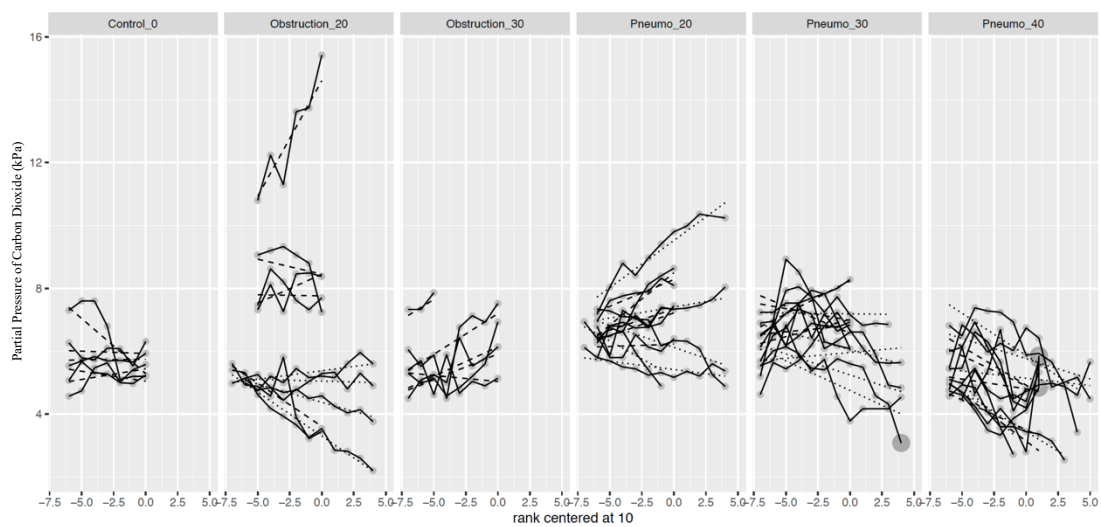

Figure S11. Scatter plot of partial pressure of carbon dioxide.

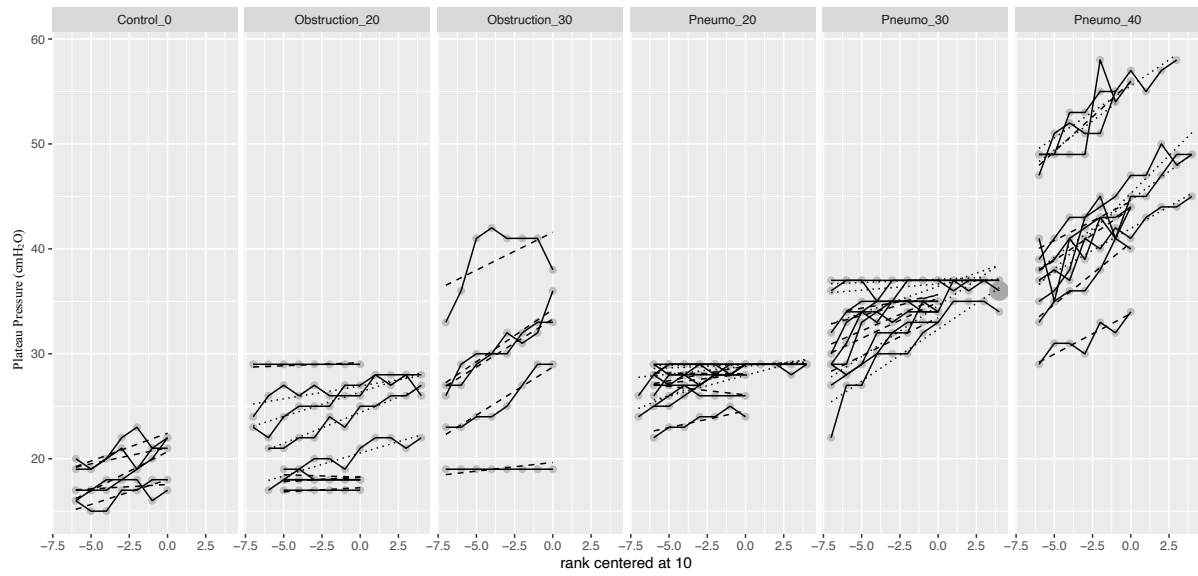

Figure S12. Scatter plot of plateau pressure.

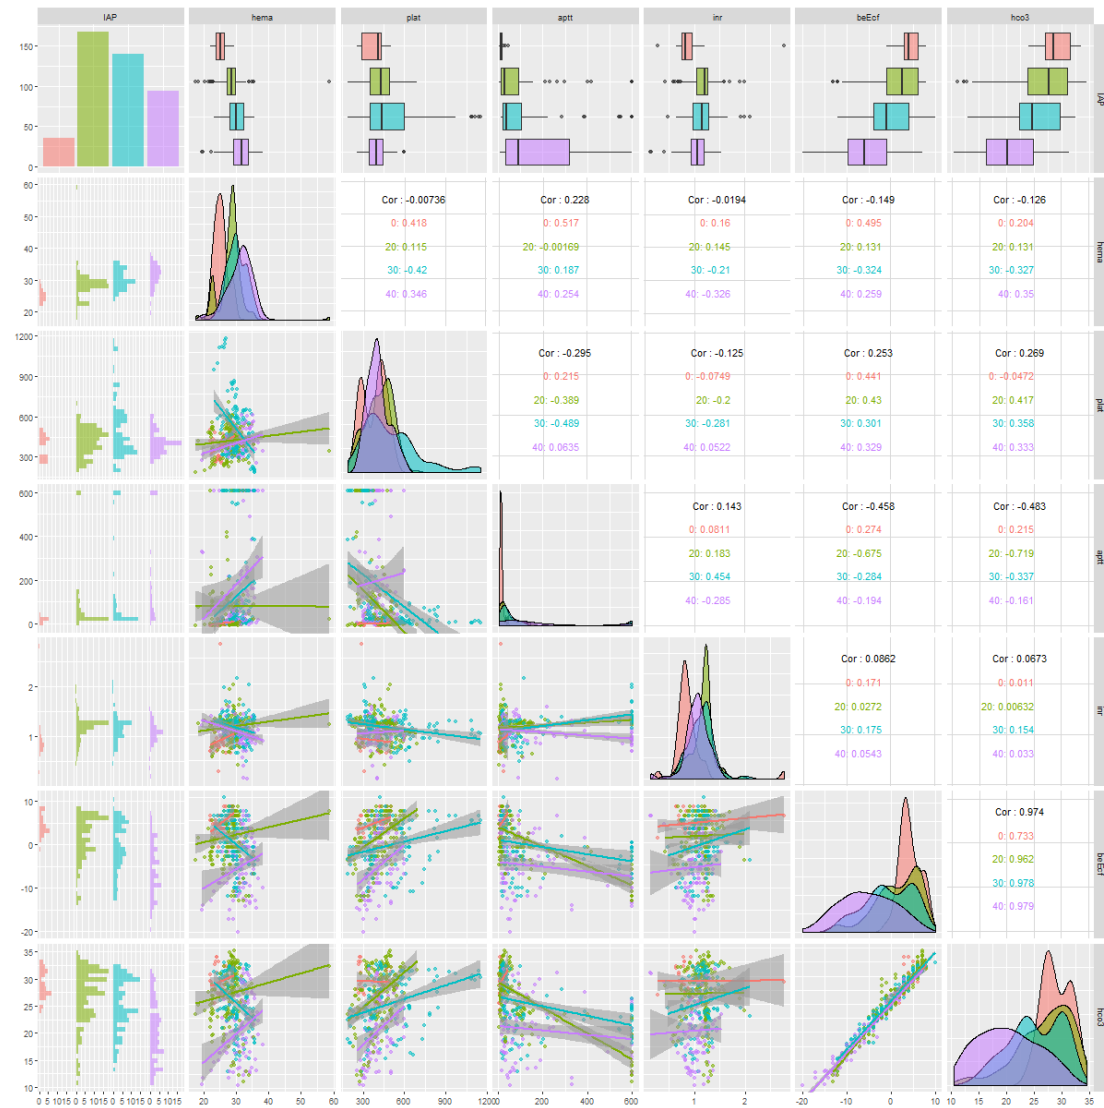



Figure S13. Composite matrix plot of key metabolic and haematological variables and comparison of pathophysiological effects at different IAP.

IAP = intra-abdominal pressure; hema = haemoglobin; plat = platelets; aptt = activated partial thromboplastin time; inr = international normalised ratio; beEcf = base excess;  $\text{HCO}_3^-$  = bicarbonate

- = Control
- = *Intra-abdominal pressure 20mmHg*
- = *Intra-abdominal pressure 30mmHg*
- = *Intra-abdominal pressure 40mmHg*

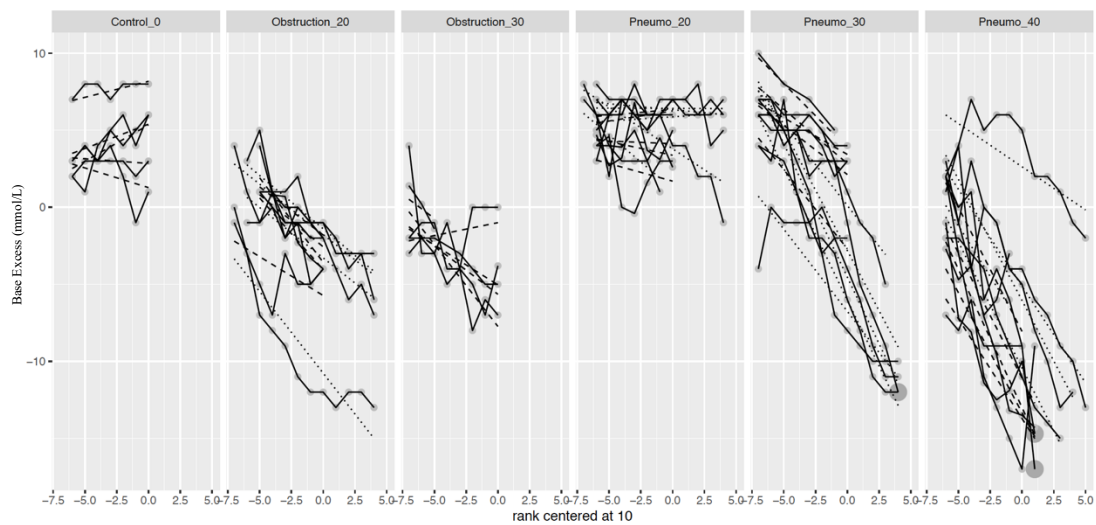

Figure S14. Scatter plot of base excess variables.

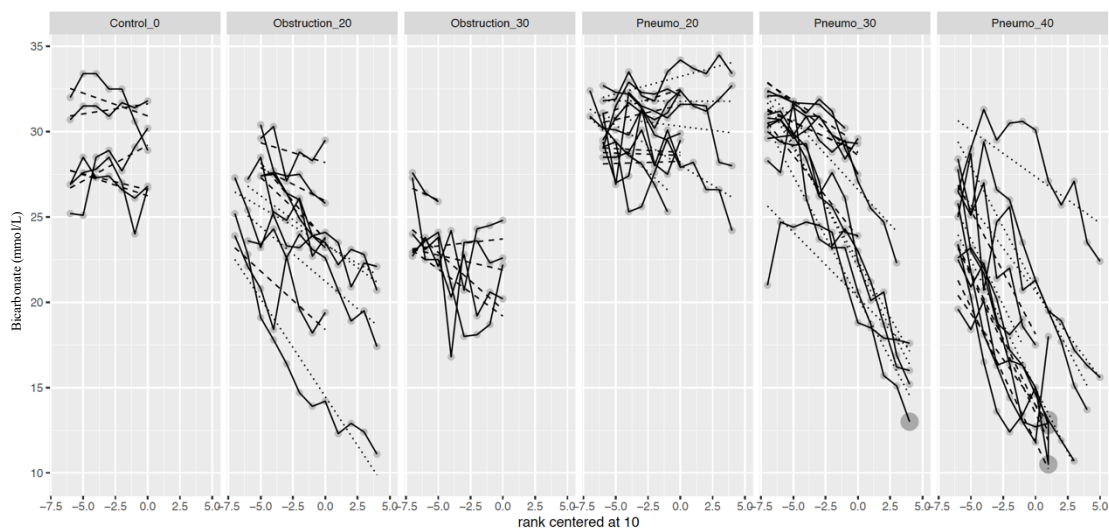

Figure S15. Scatter plot of bicarbonate variables.

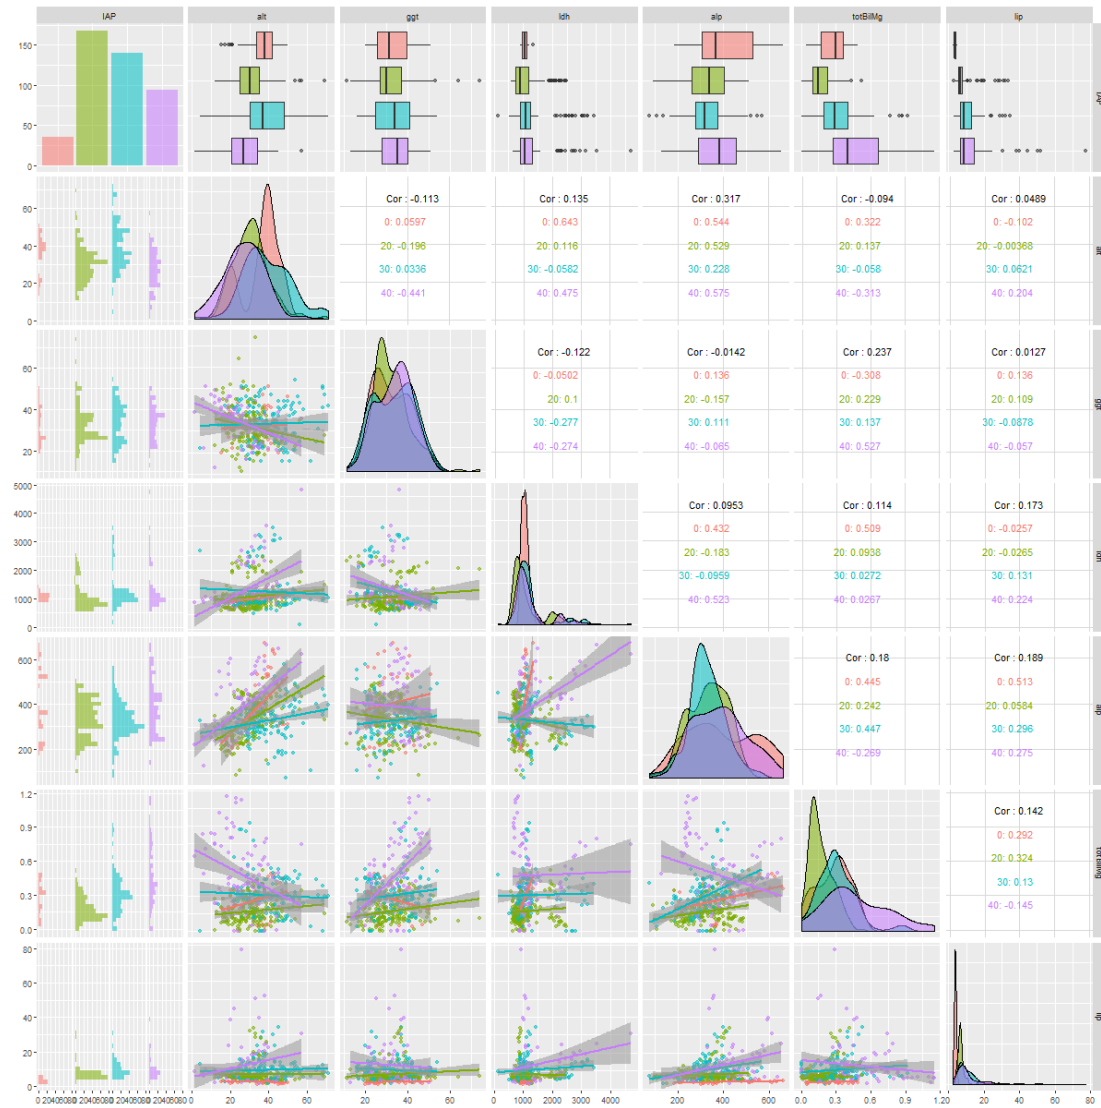

Figure S16. Composite matrix plot of key gastrointestinal variables and comparison of pathophysiological effects at different IAP.

IAP = intra-abdominal pressure; alt = alanine aminotransferase; ggt = Gamma-glutamyl transferase; ldh = lactate dehydrogenase; alp = alkaline phosphatase; totBil = total bilirubin; lip = lipase

- = Control
- = Intra-abdominal pressure 20mmHg
- = Intra-abdominal pressure 30mmHg
- = Intra-abdominal pressure 40mmHg



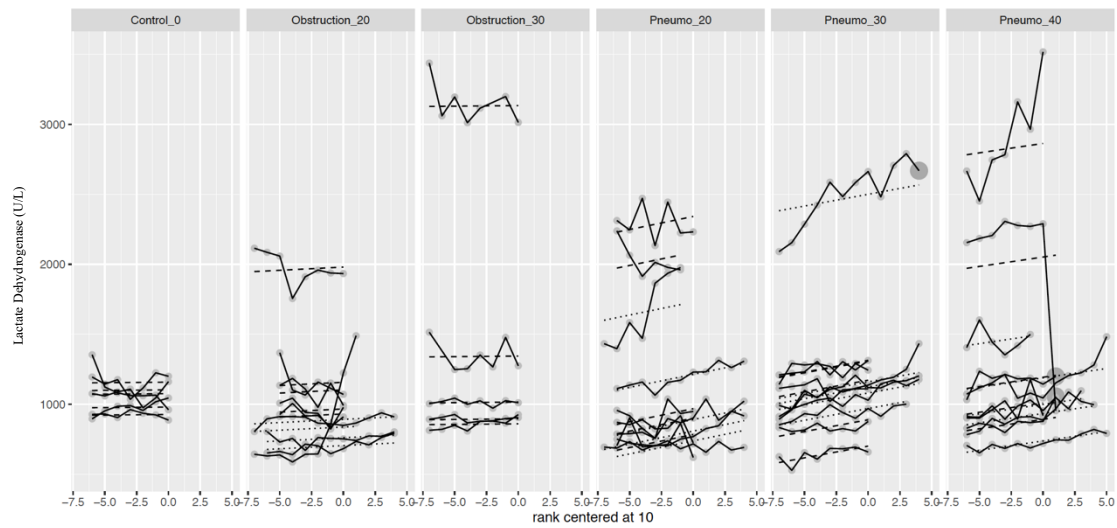

Figure S17. Scatter plot of lactate dehydrogenase variables.

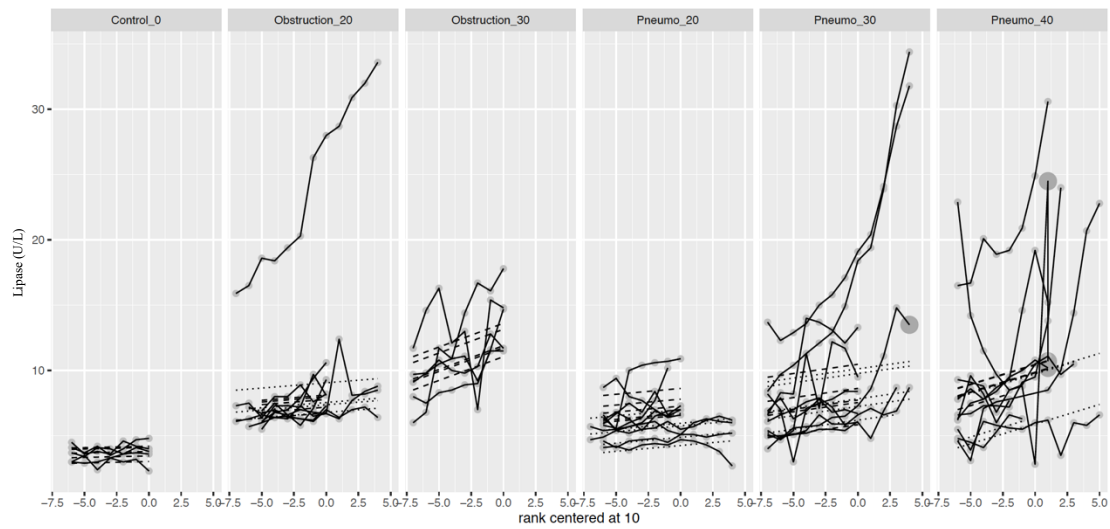

Figure S18. Scatter plot of lipase variables.

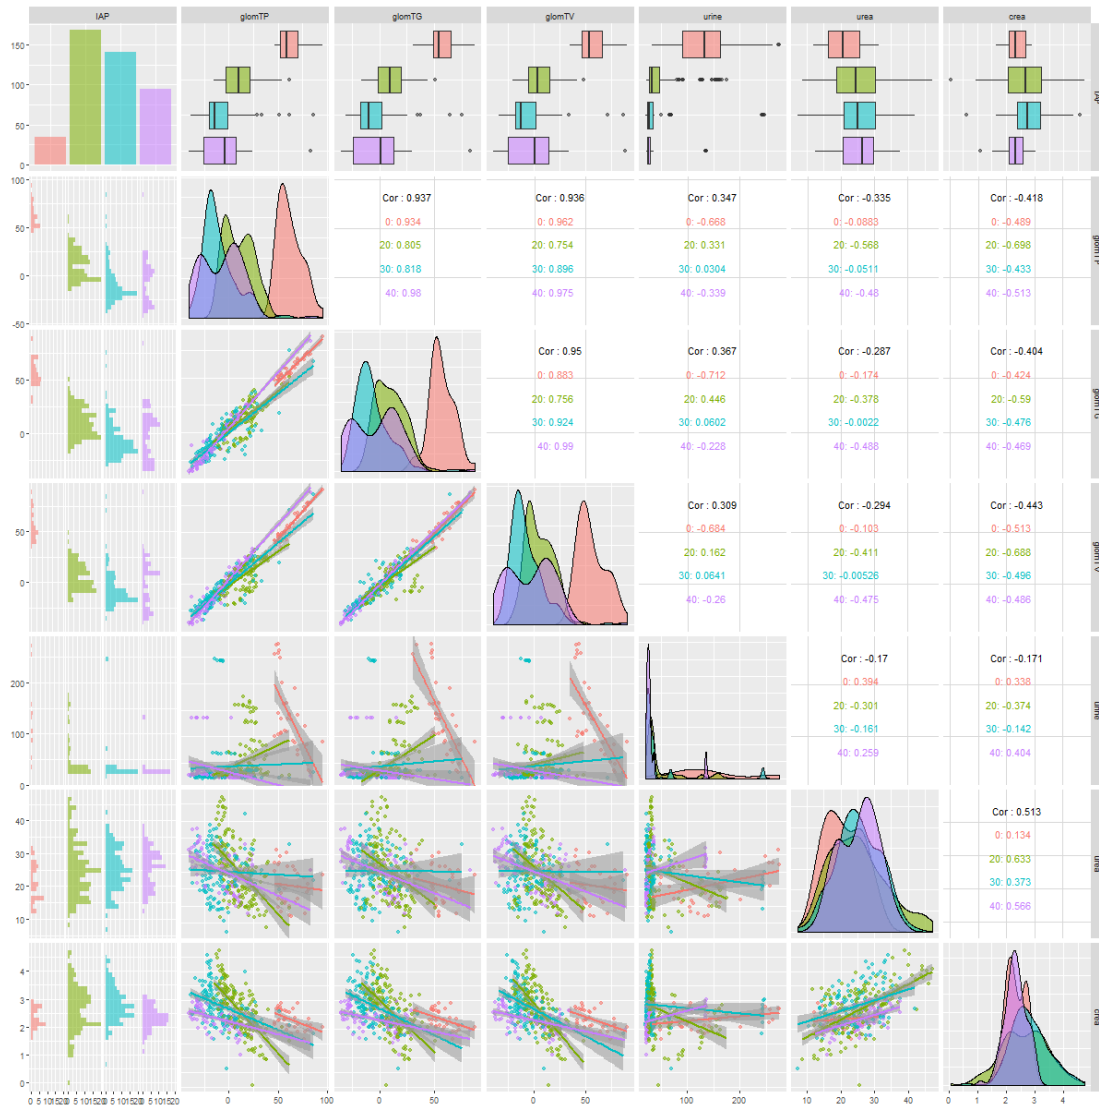

Figure S19. Composite matrix plot of key renal variables and comparison of pathophysiological effects at different IAP.

IAP = intra-abdominal pressure; glomTP = calculated glomerular filtration transperitoneal; glomTG = calculated glomerular filtration transgastric; glomTV = calculated glomerular filtration transvesical; urine = urine output; urea = urea; crea = creatinine

- = Control
- = *Intra-abdominal pressure 20mmHg*
- = *Intra-abdominal pressure 30mmHg*
- = *Intra-abdominal pressure 40mmHg*

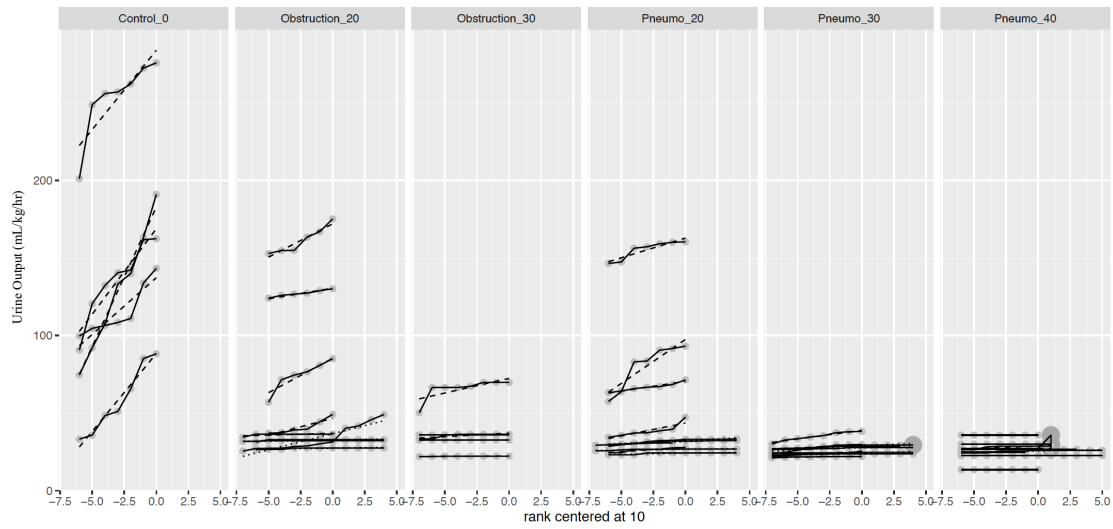

Figure S20. Scatter plot of urine output variables.

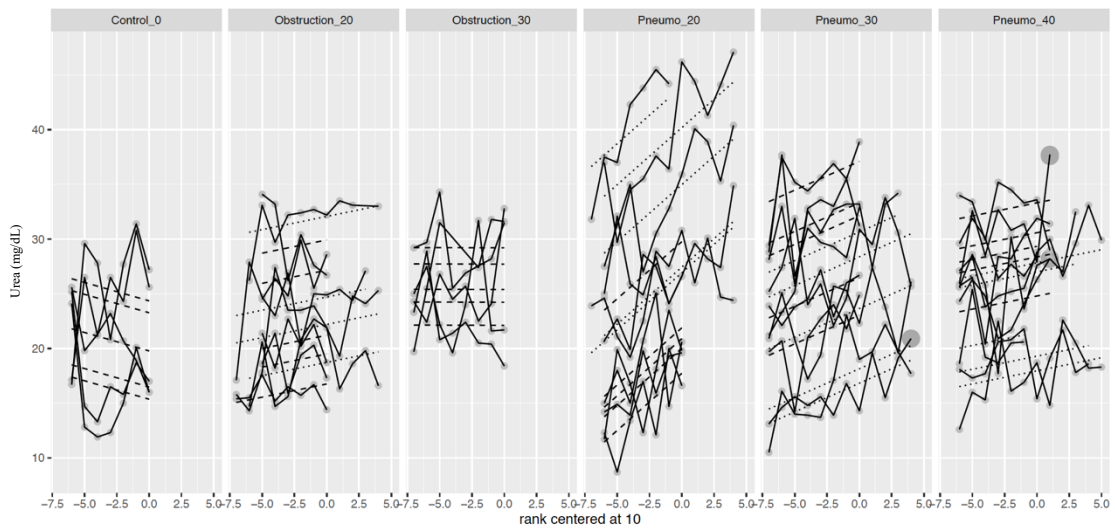

Figure S21. Scatter plot of urea variables.

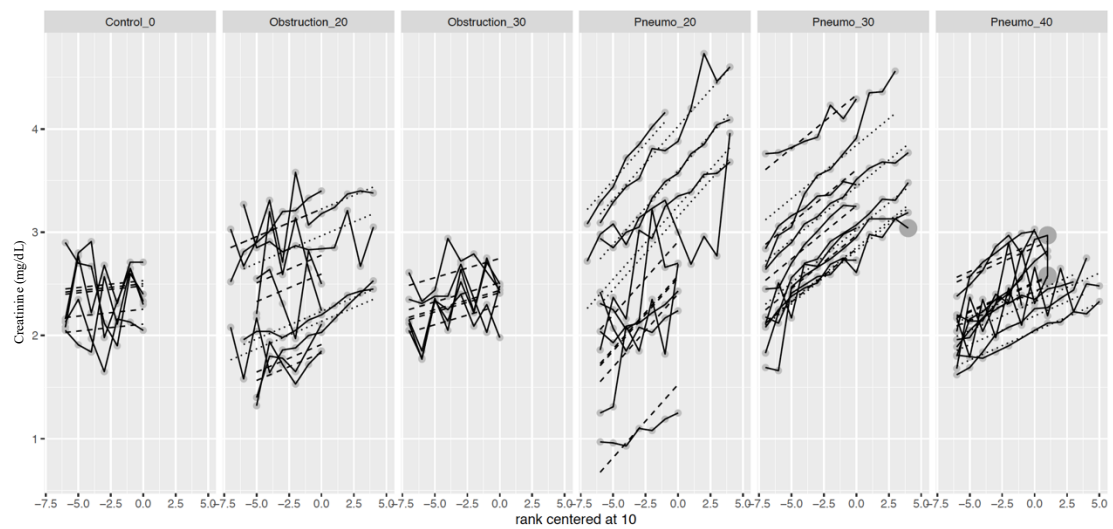

Figure S22. Scatter plot of creatinine variables.

|                                 |         | Mean  | Std. Deviation | Std. Error | 95% Confidence Interval for Mean |             | Minimum | Maximum |
|---------------------------------|---------|-------|----------------|------------|----------------------------------|-------------|---------|---------|
|                                 |         |       |                |            | Lower Bound                      | Upper Bound |         |         |
| Heart rate (beats/min)          | Control | 92.8  | 14.4           | 6.4        | 74.9                             | 110.7       | 73      | 109     |
|                                 | 20      | 102.9 | 36.7           | 8.4        | 85.2                             | 120.6       | 61      | 200     |
|                                 | 30      | 113.1 | 28.4           | 7.3        | 97.3                             | 128.8       | 85      | 167     |
|                                 | 40      | 130.1 | 41.3           | 13.1       | 100.5                            | 159.7       | 75      | 200     |
| Respiratory rate (breaths/min)  | Control | 14.0  | 0.0            | 0.0        | 14.0                             | 14.0        | 14      | 14      |
|                                 | 20      | 17.2  | 14.0           | 3.2        | 10.5                             | 24.0        | 14.0    | 75.0    |
|                                 | 30      | 14.0  | 0.0            | 0.0        | 14.0                             | 14.0        | 14.0    | 14.0    |
|                                 | 40      | 14.0  | 0.0            | 0.0        | 14.0                             | 14.0        | 14.0    | 14.0    |
| Systolic blood pressure (mmHg)  | Control | 92.4  | 24.8           | 11.1       | 61.6                             | 123.2       | 60.0    | 120.0   |
|                                 | 20      | 64.4  | 9.9            | 2.3        | 59.5                             | 69.4        | 47.0    | 80.0    |
|                                 | 30      | 67.3  | 8.4            | 2.4        | 61.9                             | 72.6        | 58.0    | 83.0    |
|                                 | 40      | 72.8  | 9.2            | 3.1        | 65.7                             | 79.8        | 61.0    | 87.0    |
| Diastolic blood pressure (mmHg) | Control | 55.4  | 13.7           | 6.1        | 38.3                             | 72.5        | 35.0    | 70.0    |
|                                 | 20      | 46.9  | 9.2            | 2.2        | 42.3                             | 51.5        | 34.0    | 67.0    |
|                                 | 30      | 49.3  | 9.2            | 2.6        | 43.7                             | 54.9        | 39.0    | 68.0    |
|                                 | 40      | 52.1  | 6.1            | 2.0        | 47.4                             | 56.8        | 43.0    | 63.0    |
| MAP (mmHg)                      | Control | 71.6  | 19.6           | 8.8        | 47.3                             | 95.9        | 50.0    | 97.0    |

|                              |         |       |      |     |      |       |      |       |
|------------------------------|---------|-------|------|-----|------|-------|------|-------|
|                              | 20      | 55.9  | 12.9 | 3.0 | 49.7 | 62.1  | 39.0 | 93.0  |
|                              | 30      | 66.9  | 27.5 | 7.1 | 51.7 | 82.2  | 46.0 | 131.0 |
|                              | 40      | 66.3  | 21.6 | 6.8 | 50.8 | 81.8  | 50.0 | 125.0 |
| PgCO <sub>2</sub> (Kpa)      | Control | 8.8   | 0.9  | 0.4 | 7.7  | 9.9   | 8.1  | 10.3  |
|                              | 20      | 10.8  | 2.1  | 0.5 | 9.8  | 11.8  | 8.4  | 16.9  |
|                              | 30      | 13.1  | 2.6  | 0.7 | 11.7 | 14.5  | 10.2 | 19.6  |
|                              | 40      | 14.0  | 1.4  | 0.5 | 12.8 | 15.1  | 12.4 | 15.8  |
| PgCO <sub>2</sub> (mmHg)     | Control | 65.7  | 6.7  | 3.0 | 57.4 | 74.0  | 60.8 | 77.3  |
|                              | 20      | 81.3  | 15.6 | 3.6 | 73.8 | 88.8  | 63.0 | 126.8 |
|                              | 30      | 98.3  | 19.2 | 5.0 | 87.7 | 109.0 | 76.5 | 147.0 |
|                              | 40      | 104.6 | 10.7 | 3.8 | 95.7 | 113.6 | 93.0 | 118.5 |
| P(g-Et)CO <sub>2</sub> (Kpa) | Control | 4.1   | 0.7  | 0.3 | 3.3  | 5.0   | 3.5  | 5.3   |
|                              | 20      | 6.3   | 2.5  | 0.6 | 5.1  | 7.4   | 1.6  | 11.9  |
|                              | 30      | 9.1   | 2.6  | 0.7 | 7.7  | 10.5  | 6.4  | 16.1  |
|                              | 40      | 10.3  | 1.3  | 0.5 | 9.2  | 11.3  | 9.2  | 12.3  |
| pH (gastric tonometry)       | Control | 7.2   | 0.0  | 0.0 | 7.2  | 7.3   | 7.2  | 7.3   |
|                              | 20      | 7.1   | 0.1  | 0.0 | 7.1  | 7.2   | 7.0  | 7.3   |
|                              | 30      | 7.1   | 0.1  | 0.0 | 7.0  | 7.1   | 6.8  | 7.2   |
|                              | 40      | 7.0   | 0.1  | 0.0 | 6.9  | 7.0   | 6.8  | 7.0   |
| EtCO <sub>2</sub> (mmHg)     | Control | 37.2  | 2.5  | 1.1 | 34.1 | 40.3  | 34.0 | 41.0  |

|                              |         |      |      |     |      |      |      |      |
|------------------------------|---------|------|------|-----|------|------|------|------|
|                              | 20      | 31.7 | 15.3 | 3.5 | 24.3 | 39.1 | 4.9  | 62.0 |
|                              | 30      | 26.0 | 13.5 | 3.5 | 18.5 | 33.5 | 4.7  | 51.0 |
|                              | 40      | 8.6  | 1.2  | 0.4 | 7.6  | 9.6  | 7.6  | 10.8 |
| pCO <sub>2</sub> (gap) (Kpa) | Control | 3.0  | 0.8  | 0.3 | 2.0  | 4.0  | 1.8  | 4.0  |
|                              | 20      | 11.2 | 11.0 | 2.5 | 5.9  | 16.5 | -1.6 | 33.0 |
|                              | 30      | 14.3 | 13.0 | 3.4 | 7.1  | 21.6 | 3.9  | 38.0 |
|                              | 40      | 32.0 | 7.9  | 2.5 | 26.4 | 37.6 | 25.0 | 51.0 |
| BIS                          | Control | 14.4 | 7.7  | 3.4 | 4.9  | 23.9 | 4.0  | 24.0 |
|                              | 20      | 34.8 | 27.6 | 6.3 | 21.5 | 48.2 | 7.0  | 84.0 |
|                              | 30      | 34.3 | 25.8 | 6.7 | 20.1 | 48.6 | 4.0  | 79.0 |
|                              | 40      | 35.1 | 30.1 | 9.5 | 13.5 | 56.7 | 1.0  | 85.0 |
| Blood temp (°C)              | Control | 36.5 | 0.5  | 0.2 | 35.9 | 37.2 | 36.2 | 37.4 |
|                              | 20      | 34.0 | 1.2  | 0.3 | 33.5 | 34.6 | 31.5 | 36.1 |
|                              | 30      | 34.1 | 0.9  | 0.2 | 33.6 | 34.6 | 32.9 | 35.6 |
|                              | 40      | 35.2 | 0.6  | 0.3 | 34.4 | 35.9 | 34.5 | 36.0 |
| PCCO (L/min)                 | Control | 2.2  | 0.3  | 0.1 | 1.9  | 2.5  | 1.9  | 2.5  |
|                              | 20      | 1.6  | 0.6  | 0.1 | 1.3  | 1.9  | 0.8  | 2.7  |
|                              | 30      | 1.7  | 0.5  | 0.1 | 1.4  | 2.0  | 1.0  | 2.9  |
|                              | 40      | 1.8  | 0.9  | 0.3 | 1.2  | 2.4  | 0.4  | 2.9  |
| PCCI (L/min/m <sup>2</sup> ) | Control | 3.8  | 0.6  | 0.3 | 3.1  | 4.5  | 3.1  | 4.6  |



|                               |         |        |       |       |        |        |        |        |
|-------------------------------|---------|--------|-------|-------|--------|--------|--------|--------|
|                               | 20      | 2.2    | 1.0   | 0.2   | 1.7    | 2.6    | 1.0    | 4.3    |
|                               | 30      | 2.2    | 0.5   | 0.1   | 1.9    | 2.4    | 1.6    | 3.2    |
|                               | 40      | 2.2    | 1.1   | 0.4   | 1.4    | 3.0    | 0.5    | 3.7    |
| CVP (mmHg)                    | Control | 2.8    | 0.4   | 0.2   | 2.2    | 3.4    | 2.0    | 3.0    |
|                               | 20      | 2.4    | 1.8   | 0.4   | 1.6    | 3.3    | 0.0    | 6.0    |
|                               | 30      | 2.9    | 2.0   | 0.5   | 1.8    | 4.0    | 0.0    | 6.0    |
|                               | 40      | 2.6    | 1.3   | 0.4   | 1.6    | 3.6    | 1.0    | 5.0    |
| PPV (%)                       | Control | 13.6   | 4.6   | 2.0   | 7.9    | 19.3   | 10.0   | 21.0   |
|                               | 20      | 24.5   | 4.3   | 1.0   | 22.4   | 26.5   | 16.0   | 31.0   |
|                               | 30      | 26.3   | 6.3   | 1.7   | 22.5   | 30.1   | 18.0   | 40.0   |
|                               | 40      | 23.3   | 1.2   | 0.7   | 20.5   | 26.2   | 22.0   | 24.0   |
| SV (ml)                       | Control | 23.5   | 3.1   | 1.4   | 19.6   | 27.4   | 21.2   | 29.0   |
|                               | 20      | 15.7   | 4.3   | 1.0   | 13.6   | 17.8   | 8.0    | 23.0   |
|                               | 30      | 15.0   | 3.5   | 0.9   | 13.0   | 16.9   | 11.0   | 23.6   |
|                               | 40      | 12.9   | 5.3   | 1.7   | 9.1    | 16.7   | 3.7    | 22.0   |
| SVI (ml/m <sup>2</sup> )      | Control | 40.6   | 5.3   | 2.4   | 34.0   | 47.1   | 34.2   | 48.1   |
|                               | 20      | 21.4   | 7.1   | 1.6   | 17.9   | 24.8   | 10.0   | 38.8   |
|                               | 30      | 20.2   | 3.9   | 1.0   | 18.1   | 22.4   | 12.8   | 28.0   |
|                               | 40      | 15.8   | 6.1   | 1.9   | 11.4   | 20.2   | 5.2    | 24.0   |
| SVR (dyn/s/cm <sup>-5</sup> ) | Control | 2478.0 | 717.7 | 321.0 | 1586.9 | 3369.1 | 1530.0 | 3430.0 |

|                                                |         |        |        |        |        |        |        |         |
|------------------------------------------------|---------|--------|--------|--------|--------|--------|--------|---------|
|                                                | 20      | 2797.2 | 775.9  | 178.0  | 2423.2 | 3171.2 | 1390.0 | 4320.0  |
|                                                | 30      | 3004.7 | 1199.5 | 309.7  | 2340.4 | 3668.9 | 1000.0 | 5640.0  |
|                                                | 40      | 3122.2 | 1556.1 | 518.7  | 1926.1 | 4318.3 | 1300.0 | 5610.0  |
| SVR calculated (dyn/s/cm <sup>-5</sup> )       | Control | 2507.7 | 656.1  | 293.4  | 1693.0 | 3322.3 | 1689.2 | 3372.2  |
|                                                | 20      | 2877.3 | 781.2  | 179.2  | 2500.7 | 3253.8 | 1465.2 | 4099.2  |
|                                                | 30      | 3113.5 | 1025.0 | 264.6  | 2545.9 | 3681.1 | 1784.0 | 5292.9  |
|                                                | 40      | 4090.6 | 3962.0 | 1252.9 | 1256.4 | 6924.9 | 1566.4 | 14666.7 |
| SVRI (dyn/s/cm <sup>-5</sup> /m <sup>2</sup> ) | Control | 1421.8 | 342.1  | 153.0  | 997.0  | 1846.6 | 923.0  | 1768.0  |
|                                                | 20      | 2053.2 | 539.1  | 123.7  | 1793.4 | 2313.1 | 907.0  | 2808.0  |
|                                                | 30      | 2283.3 | 703.7  | 181.7  | 1893.7 | 2673.0 | 1691.0 | 4503.0  |
|                                                | 40      | 3292.8 | 2906.3 | 919.1  | 1213.7 | 5371.9 | 1151.0 | 11265.0 |
| dPmx (mmHg/s)                                  | Control | 612.0  | 343.7  | 153.7  | 185.3  | 1038.7 | 280.0  | 1130.0  |
|                                                | 20      | 412.8  | 340.5  | 78.1   | 248.7  | 576.9  | 210.0  | 1747.0  |
|                                                | 30      | 398.7  | 172.4  | 44.5   | 303.2  | 494.2  | 200.0  | 877.0   |
|                                                | 40      | 465.9  | 179.9  | 56.9   | 337.2  | 594.6  | 283.0  | 860.0   |
| SVV (%)                                        | Control | 14.0   | 4.7    | 2.1    | 8.2    | 19.8   | 10.0   | 22.0    |
|                                                | 20      | 23.7   | 3.0    | 0.7    | 22.2   | 25.2   | 19.0   | 30.0    |
|                                                | 30      | 27.4   | 4.5    | 1.2    | 24.8   | 30.0   | 19.0   | 36.0    |
|                                                | 40      | 28.1   | 2.6    | 0.9    | 25.9   | 30.3   | 25.0   | 32.0    |
| FiO <sub>2</sub> (%)                           | Control | 91.8   | 1.8    | 0.8    | 89.6   | 94.0   | 91.0   | 95.0    |

|                                              |         |      |      |     |      |      |      |      |
|----------------------------------------------|---------|------|------|-----|------|------|------|------|
|                                              | 20      | 84.9 | 13.0 | 3.0 | 78.6 | 91.2 | 36.0 | 96.0 |
|                                              | 30      | 89.3 | 4.9  | 1.3 | 86.6 | 92.1 | 82.0 | 95.0 |
|                                              | 40      | 82.2 | 0.4  | 0.1 | 81.9 | 82.5 | 82.0 | 83.0 |
| Peak pulmonary pressure (cmH <sub>2</sub> O) | Control | 18.6 | 2.3  | 1.0 | 15.7 | 21.5 | 16.0 | 21.0 |
|                                              | 20      | 24.6 | 4.1  | 0.9 | 22.7 | 26.6 | 18.0 | 29.0 |
|                                              | 30      | 30.7 | 4.7  | 1.2 | 28.1 | 33.3 | 22.0 | 37.0 |
|                                              | 40      | 40.3 | 7.0  | 2.2 | 35.3 | 45.3 | 29.0 | 50.0 |
| Mean pulmonary press (cmH <sub>2</sub> O)    | Control | 4.8  | 0.4  | 0.2 | 4.2  | 5.4  | 4.0  | 5.0  |
|                                              | 20      | 5.8  | 0.8  | 0.2 | 5.4  | 6.2  | 4.0  | 7.0  |
|                                              | 30      | 6.4  | 1.0  | 0.3 | 5.9  | 6.9  | 5.0  | 8.0  |
|                                              | 40      | 7.8  | 1.1  | 0.4 | 7.0  | 8.6  | 6.0  | 10.0 |
| Plateau pressure (cmH <sub>2</sub> O)        | Control | 17.6 | 1.8  | 0.8 | 15.3 | 19.9 | 16.0 | 20.0 |
|                                              | 20      | 23.9 | 4.4  | 1.0 | 21.8 | 26.0 | 17.0 | 29.0 |
|                                              | 30      | 30.1 | 5.2  | 1.3 | 27.3 | 33.0 | 19.0 | 37.0 |
|                                              | 40      | 39.7 | 6.8  | 2.2 | 34.8 | 44.6 | 29.0 | 49.0 |
| PEEP (cmH <sub>2</sub> O)                    | Control | 2.0  | 0.0  | 0.0 | 2.0  | 2.0  | 2.0  | 2.0  |
|                                              | 20      | 1.4  | 0.5  | 0.1 | 1.1  | 1.6  | 1.0  | 2.0  |
|                                              | 30      | 1.5  | 0.5  | 0.1 | 1.2  | 1.8  | 1.0  | 2.0  |
|                                              | 40      | 0.9  | 0.3  | 0.1 | 0.7  | 1.1  | 0.0  | 1.0  |
| Compliance (ml/cm/H <sub>2</sub> O)          | Control | 18.0 | 4.1  | 1.8 | 13.0 | 23.0 | 12.0 | 23.0 |

|                                             |         |       |      |      |       |       |       |       |
|---------------------------------------------|---------|-------|------|------|-------|-------|-------|-------|
|                                             | 20      | 8.5   | 1.7  | 0.4  | 7.7   | 9.3   | 5.4   | 11.0  |
|                                             | 30      | 7.4   | 1.4  | 0.4  | 6.6   | 8.1   | 5.9   | 10.0  |
|                                             | 40      | 7.2   | 1.2  | 0.4  | 6.3   | 8.0   | 5.4   | 9.0   |
| Compliance static (ml/cm/H <sub>2</sub> O)  | Control | 18.6  | 4.2  | 1.9  | 13.4  | 23.8  | 12.2  | 23.5  |
|                                             | 20      | 8.5   | 1.6  | 0.4  | 7.7   | 9.3   | 5.3   | 11.3  |
|                                             | 30      | 7.3   | 1.3  | 0.3  | 6.6   | 8.0   | 5.9   | 10.0  |
|                                             | 40      | 7.3   | 1.5  | 0.5  | 6.3   | 8.4   | 5.6   | 9.6   |
| Compliance dynamic (ml/cm/H <sub>2</sub> O) | Control | 17.4  | 3.6  | 1.6  | 13.0  | 21.9  | 11.6  | 21.1  |
|                                             | 20      | 8.2   | 1.6  | 0.4  | 7.4   | 9.0   | 4.4   | 10.6  |
|                                             | 30      | 7.1   | 1.2  | 0.3  | 6.4   | 7.7   | 5.9   | 9.6   |
|                                             | 40      | 7.2   | 1.4  | 0.4  | 6.2   | 8.2   | 5.5   | 9.2   |
| VT inspiratory (ml)                         | Control | 288.0 | 75.0 | 33.5 | 194.9 | 381.1 | 230.0 | 410.0 |
|                                             | 20      | 219.5 | 51.5 | 11.8 | 194.7 | 244.3 | 120.0 | 320.0 |
|                                             | 30      | 234.7 | 33.6 | 8.7  | 216.1 | 253.3 | 160.0 | 290.0 |
|                                             | 40      | 300.0 | 36.5 | 11.5 | 273.9 | 326.1 | 250.0 | 370.0 |
| VT expiratory (ml)                          | Control | 288.0 | 70.5 | 31.5 | 200.5 | 375.5 | 220.0 | 400.0 |
|                                             | 20      | 191.3 | 50.3 | 11.5 | 167.0 | 215.5 | 84.0  | 270.0 |
|                                             | 30      | 204.0 | 29.0 | 7.5  | 187.9 | 220.1 | 150.0 | 260.0 |
|                                             | 40      | 257.0 | 40.0 | 12.7 | 228.4 | 285.6 | 190.0 | 320.0 |
| MV inspiratory (l/min)                      | Control | 4.0   | 1.0  | 0.5  | 2.7   | 5.3   | 3.2   | 5.7   |

|                                            |         |      |      |      |       |       |       |       |
|--------------------------------------------|---------|------|------|------|-------|-------|-------|-------|
|                                            | 20      | 3.1  | 0.7  | 0.2  | 2.7   | 3.4   | 1.7   | 4.4   |
|                                            | 30      | 3.3  | 0.4  | 0.1  | 3.0   | 3.5   | 2.3   | 4.0   |
|                                            | 40      | 4.1  | 0.6  | 0.2  | 3.7   | 4.5   | 3.2   | 5.2   |
| MV expiratory (l/min)                      | Control | 4.0  | 0.9  | 0.4  | 2.8   | 5.2   | 3.1   | 5.5   |
|                                            | 20      | 2.7  | 0.7  | 0.2  | 2.3   | 3.0   | 1.2   | 3.7   |
|                                            | 30      | 2.9  | 0.4  | 0.1  | 2.6   | 3.1   | 2.1   | 3.7   |
|                                            | 40      | 3.5  | 0.7  | 0.2  | 3.0   | 4.0   | 2.2   | 4.5   |
| Airway resistance (cmH <sub>2</sub> O/l/s) | Control | 10.6 | 1.5  | 0.7  | 8.7   | 12.5  | 9.0   | 13.0  |
|                                            | 20      | 13.9 | 1.5  | 0.3  | 13.2  | 14.7  | 11.0  | 17.0  |
|                                            | 30      | 14.2 | 3.2  | 0.8  | 12.4  | 16.0  | 9.0   | 19.0  |
|                                            | 40      | 16.0 | 4.6  | 1.5  | 12.7  | 19.3  | 12.0  | 24.0  |
| Respiratory flow (ml/s)                    | Control | 97.6 | 71.8 | 32.1 | 8.4   | 186.8 | 0.0   | 200.0 |
|                                            | 20      | 54.3 | 53.5 | 12.3 | 28.5  | 80.1  | 0.0   | 214.3 |
|                                            | 30      | 52.1 | 80.2 | 20.7 | 7.7   | 96.6  | 0.0   | 300.0 |
|                                            | 40      | 37.8 | 35.8 | 11.3 | 12.2  | 63.5  | 0.0   | 83.3  |
| Glomerular filtration – TP (mmHg)          | Control | 69.6 | 20.2 | 9.0  | 44.6  | 94.6  | 46.0  | 95.0  |
|                                            | 20      | 19.0 | 16.4 | 3.9  | 10.9  | 27.1  | -3.0  | 61.0  |
|                                            | 30      | -3.1 | 15.3 | 4.2  | -12.3 | 6.1   | -20.0 | 33.0  |
|                                            | 40      | -3.2 | 19.5 | 6.2  | -17.1 | 10.7  | -31.0 | 24.0  |
| IAP TP pressure (mmHg)                     | Control | 1.0  | 0.7  | 0.3  | 0.1   | 1.9   | 0.0   | 2.0   |

|                                   |         |      |      |     |       |      |       |      |
|-----------------------------------|---------|------|------|-----|-------|------|-------|------|
|                                   | 20      | 17.9 | 4.6  | 1.0 | 15.7  | 20.1 | 10.0  | 23.0 |
|                                   | 30      | 29.9 | 5.1  | 1.3 | 27.1  | 32.7 | 15.0  | 35.0 |
|                                   | 40      | 41.6 | 4.6  | 1.5 | 38.3  | 44.9 | 35.0  | 50.0 |
| Glomerular filtration – TG (mmHg) | Control | 64.6 | 15.8 | 7.1 | 45.0  | 84.3 | 47.6  | 87.0 |
|                                   | 20      | 19.7 | 13.9 | 3.3 | 12.8  | 26.6 | -1.0  | 50.8 |
|                                   | 30      | 0.2  | 12.9 | 3.6 | -7.6  | 8.0  | -15.4 | 23.0 |
|                                   | 40      | -1.1 | 22.0 | 7.0 | -16.8 | 14.6 | -28.6 | 29.3 |
| IAP TG pressure (mmHg)            | Control | 3.5  | 2.3  | 1.0 | 0.6   | 6.3  | 1.2   | 6.7  |
|                                   | 20      | 17.9 | 4.5  | 1.0 | 15.8  | 20.1 | 4.5   | 21.1 |
|                                   | 30      | 28.7 | 2.0  | 0.5 | 27.6  | 29.9 | 25.3  | 32.7 |
|                                   | 40      | 39.2 | 2.8  | 0.9 | 37.3  | 41.2 | 32.7  | 42.0 |
| Glomerular filtration – TV (mmHg) | Control | 64.8 | 19.9 | 8.9 | 40.1  | 89.5 | 42.0  | 90.0 |
|                                   | 20      | 13.9 | 13.9 | 3.3 | 7.0   | 20.8 | -3.0  | 48.0 |
|                                   | 30      | -2.7 | 9.9  | 2.8 | -8.7  | 3.3  | -14.0 | 15.0 |
|                                   | 40      | -0.9 | 22.1 | 7.0 | -16.7 | 15.0 | -26.0 | 28.0 |
| IAP TV pressure (mmHg)            | Control | 3.4  | 0.5  | 0.2 | 2.7   | 4.1  | 2.5   | 4.0  |
|                                   | 20      | 20.8 | 1.7  | 0.4 | 20.0  | 21.6 | 18.5  | 25.5 |
|                                   | 30      | 29.4 | 2.1  | 0.6 | 28.2  | 30.6 | 22.0  | 30.5 |
|                                   | 40      | 39.0 | 2.2  | 0.7 | 37.4  | 40.5 | 33.0  | 40.0 |
| Mean IAP TP (mmHg)                | Control | 1.1  | 0.6  | 0.3 | 0.3   | 1.9  | 0.1   | 1.7  |



|                    |         |      |      |      |      |       |       |       |
|--------------------|---------|------|------|------|------|-------|-------|-------|
|                    | 20      | 18.5 | 4.3  | 1.1  | 16.0 | 21.0  | 10.2  | 22.9  |
|                    | 30      |      |      |      |      |       |       |       |
|                    | 40      | 41.8 | 1.9  | 0.7  | 40.2 | 43.4  | 39.7  | 45.5  |
| Mean IAP TG (mmHg) | Control | 4.1  | 1.9  | 0.8  | 1.8  | 6.4   | 1.7   | 6.1   |
|                    | 20      | 17.4 | 5.1  | 1.3  | 14.5 | 20.3  | 5.8   | 22.7  |
|                    | 30      |      |      |      |      |       |       |       |
|                    | 40      | 37.5 | 1.2  | 0.4  | 36.5 | 38.5  | 35.2  | 39.4  |
| Mean IAP TV (mmHg) | Control | 3.8  | 1.0  | 0.5  | 2.5  | 5.1   | 2.9   | 5.4   |
|                    | 20      | 20.5 | 1.2  | 0.3  | 19.8 | 21.2  | 19.6  | 24.3  |
|                    | 30      |      |      |      |      |       |       |       |
|                    | 40      | 37.6 | 1.5  | 0.5  | 36.3 | 38.8  | 35.7  | 39.7  |
| IAP mean (mmHg)    | Control | 3.9  | 0.7  | 0.3  | 3.1  | 4.8   | 3.0   | 4.5   |
|                    | 20      | 19.0 | 2.1  | 0.5  | 17.8 | 20.1  | 13.7  | 21.3  |
|                    | 30      |      |      |      |      |       |       |       |
|                    | 40      | 37.6 | 1.2  | 0.4  | 36.6 | 38.6  | 35.8  | 39.5  |
| IAP bias (mmHg)    | Control | 0.1  | 2.4  | 1.1  | -2.8 | 3.0   | -2.8  | 3.2   |
|                    | 20      | -2.8 | 5.4  | 1.2  | -5.4 | -0.2  | -21.0 | 1.6   |
|                    | 30      | -0.7 | 3.7  | 1.0  | -2.7 | 1.4   | -5.2  | 10.7  |
|                    | 40      | 0.3  | 1.5  | 0.5  | -0.8 | 1.4   | -1.7  | 2.2   |
| Urine (ml)         | Control | 99.8 | 62.1 | 27.8 | 22.8 | 176.9 | 33.2  | 201.1 |

|                        |         |      |      |     |      |      |      |       |
|------------------------|---------|------|------|-----|------|------|------|-------|
|                        | 20      | 51.9 | 41.6 | 9.6 | 31.9 | 72.0 | 23.1 | 152.9 |
|                        | 30      | 29.5 | 11.2 | 2.9 | 23.3 | 35.8 | 21.5 | 66.5  |
|                        | 40      | 25.4 | 5.7  | 1.8 | 21.3 | 29.5 | 13.5 | 35.8  |
| APP checked (mmHg)     | Control | 70.6 | 19.9 | 8.9 | 45.9 | 95.3 | 48.0 | 96.0  |
|                        | 20      | 38.0 | 14.1 | 3.2 | 31.2 | 44.8 | 18.0 | 77.0  |
|                        | 30      | 37.0 | 28.7 | 7.4 | 21.1 | 53.0 | 13.0 | 108.0 |
|                        | 40      | 23.9 | 22.3 | 7.0 | 8.0  | 39.8 | 7.0  | 83.0  |
| Temp (°C)              | Control | 37.0 | 0.0  | 0.0 | 37.0 | 37.0 | 37.0 | 37.0  |
|                        | 20      | 35.3 | 2.5  | 0.9 | 33.2 | 37.3 | 31.3 | 37.0  |
|                        | 30      |      |      |     |      |      |      |       |
|                        | 40      |      |      |     |      |      |      |       |
| pH                     | Control | 7.4  | 0.1  | 0.0 | 7.4  | 7.5  | 7.4  | 7.5   |
|                        | 20      | 7.4  | 0.1  | 0.0 | 7.3  | 7.4  | 7.2  | 7.5   |
|                        | 30      | 7.4  | 0.0  | 0.0 | 7.4  | 7.4  | 7.3  | 7.4   |
|                        | 40      | 7.4  | 0.1  | 0.0 | 7.4  | 7.4  | 7.3  | 7.5   |
| pCO <sub>2</sub> (Kpa) | Control | 5.8  | 1.1  | 0.5 | 4.4  | 7.1  | 4.6  | 7.3   |
|                        | 20      | 6.6  | 1.5  | 0.3 | 5.9  | 7.3  | 4.9  | 10.8  |
|                        | 30      | 6.3  | 0.8  | 0.2 | 5.8  | 6.7  | 5.0  | 7.3   |
|                        | 40      | 5.3  | 0.7  | 0.2 | 4.8  | 5.9  | 4.6  | 6.8   |
| pO <sub>2</sub> (Kpa)  | Control | 41.3 | 10.0 | 4.5 | 28.9 | 53.7 | 25.7 | 52.1  |

|                           |         |       |      |     |       |       |       |       |
|---------------------------|---------|-------|------|-----|-------|-------|-------|-------|
|                           | 20      | 52.4  | 13.9 | 3.2 | 45.7  | 59.1  | 24.8  | 80.8  |
|                           | 30      | 62.2  | 10.8 | 3.0 | 55.6  | 68.7  | 43.9  | 75.2  |
|                           | 40      | 47.6  | 6.0  | 1.9 | 43.3  | 51.9  | 33.2  | 55.3  |
| BEecf (mmol/L)            | Control | 3.4   | 2.1  | 0.9 | 0.8   | 6.0   | 2.0   | 7.0   |
|                           | 20      | 3.0   | 3.2  | 0.7 | 1.5   | 4.6   | -3.0  | 8.0   |
|                           | 30      | 2.5   | 3.9  | 1.1 | 0.1   | 4.8   | -3.0  | 7.0   |
|                           | 40      | -0.1  | 3.1  | 1.0 | -2.3  | 2.2   | -7.0  | 3.0   |
| HCO <sub>3</sub> (mmol/L) | Control | 28.3  | 2.9  | 1.3 | 24.8  | 31.9  | 25.2  | 32.0  |
|                           | 20      | 28.3  | 3.0  | 0.7 | 26.9  | 29.7  | 22.1  | 32.7  |
|                           | 30      | 27.4  | 3.6  | 1.0 | 25.3  | 29.6  | 22.5  | 32.1  |
|                           | 40      | 24.8  | 2.7  | 0.9 | 22.8  | 26.8  | 19.6  | 28.4  |
| TCO <sub>2</sub> (mmol/L) | Control | 28.4  | 2.2  | 1.0 | 25.7  | 31.1  | 26.0  | 32.0  |
|                           | 20      | 28.8  | 4.3  | 1.0 | 26.7  | 30.8  | 16.5  | 34.0  |
|                           | 30      | 28.9  | 3.7  | 1.0 | 26.6  | 31.1  | 24.0  | 34.0  |
|                           | 40      | 29.1  | 9.0  | 2.8 | 22.6  | 35.5  | 21.0  | 53.5  |
| SpO <sub>2</sub> (%)      | Control | 100.0 | 0.0  | 0.0 | 99.9  | 100.0 | 99.9  | 100.0 |
|                           | 20      | 100.0 | 0.0  | 0.0 | 100.0 | 100.0 | 100.0 | 100.0 |
|                           | 30      | 100.0 | 0.0  | 0.0 | 100.0 | 100.0 | 100.0 | 100.0 |
|                           | 40      | 100.0 | 0.0  | 0.0 | 100.0 | 100.0 | 100.0 | 100.0 |
| Sodium (mmol/L)           | Control | 135.4 | 1.5  | 0.7 | 133.5 | 137.3 | 133.0 | 137.0 |

|                            |         |       |     |     |       |       |       |       |
|----------------------------|---------|-------|-----|-----|-------|-------|-------|-------|
|                            | 20      | 137.0 | 2.2 | 0.5 | 135.9 | 138.1 | 134.0 | 141.0 |
|                            | 30      | 137.2 | 2.4 | 0.7 | 135.6 | 138.7 | 133.0 | 142.0 |
|                            | 40      | 137.0 | 2.2 | 0.7 | 135.3 | 138.7 | 135.0 | 140.0 |
| Potassium (mmol/L)         | Control | 4.5   | 0.3 | 0.1 | 4.1   | 4.9   | 4.1   | 4.9   |
|                            | 20      | 4.0   | 0.7 | 0.2 | 3.7   | 4.4   | 2.8   | 5.9   |
|                            | 30      | 4.3   | 0.6 | 0.2 | 3.9   | 4.7   | 3.1   | 5.0   |
|                            | 40      | 4.8   | 0.9 | 0.3 | 4.1   | 5.5   | 3.4   | 6.1   |
| RCC (x10 <sup>6</sup> /uL) | Control | 5.4   | 0.5 | 0.2 | 4.8   | 6.1   | 4.7   | 6.0   |
|                            | 20      | 6.3   | 0.7 | 0.2 | 6.0   | 6.6   | 5.1   | 7.9   |
|                            | 30      | 6.6   | 0.8 | 0.2 | 6.2   | 7.0   | 5.6   | 8.0   |
|                            | 40      | 6.5   | 0.6 | 0.2 | 6.0   | 6.9   | 5.4   | 7.4   |
| Haematocrit (%)            | Control | 25.6  | 2.7 | 1.2 | 22.3  | 28.9  | 22.9  | 29.5  |
|                            | 20      | 28.7  | 2.8 | 0.7 | 27.3  | 30.1  | 21.5  | 35.3  |
|                            | 30      | 29.6  | 3.3 | 0.8 | 27.8  | 31.4  | 23.3  | 35.2  |
|                            | 40      | 29.4  | 3.0 | 0.9 | 27.3  | 31.6  | 25.7  | 35.2  |
| Haemoglobin (g/dl)         | Control | 7.8   | 0.7 | 0.3 | 6.9   | 8.7   | 7.0   | 8.8   |
|                            | 20      | 8.7   | 1.0 | 0.2 | 8.2   | 9.2   | 6.7   | 11.2  |
|                            | 30      | 9.2   | 1.1 | 0.3 | 8.6   | 9.8   | 7.2   | 11.1  |
|                            | 40      | 9.5   | 0.8 | 0.3 | 8.9   | 10.1  | 8.2   | 10.6  |
| MCV (fl)                   | Control | 47.1  | 2.6 | 1.2 | 43.8  | 50.3  | 44.2  | 50.3  |

|                                                |         |       |       |      |       |       |       |       |
|------------------------------------------------|---------|-------|-------|------|-------|-------|-------|-------|
|                                                | 20      | 45.7  | 3.5   | 0.8  | 44.0  | 47.4  | 38.9  | 51.0  |
|                                                | 30      | 45.3  | 5.5   | 1.4  | 42.2  | 48.3  | 36.5  | 57.4  |
|                                                | 40      | 45.5  | 2.3   | 0.7  | 43.9  | 47.1  | 42.6  | 49.4  |
| MCH (pg)                                       | Control | 14.4  | 0.8   | 0.4  | 13.4  | 15.4  | 13.5  | 15.5  |
|                                                | 20      | 13.9  | 1.1   | 0.3  | 13.3  | 14.4  | 11.5  | 15.4  |
|                                                | 30      | 14.2  | 2.0   | 0.5  | 13.0  | 15.3  | 11.3  | 18.4  |
|                                                | 40      | 14.6  | 0.6   | 0.2  | 14.2  | 15.0  | 13.6  | 15.6  |
| MCHC (g/dl)                                    | Control | 30.5  | 0.4   | 0.2  | 30.0  | 31.1  | 29.8  | 30.8  |
|                                                | 20      | 30.4  | 1.0   | 0.2  | 29.9  | 30.8  | 28.2  | 31.7  |
|                                                | 30      | 31.2  | 0.8   | 0.2  | 30.7  | 31.6  | 30.1  | 32.7  |
|                                                | 40      | 32.2  | 1.0   | 0.3  | 31.5  | 32.9  | 30.1  | 33.8  |
| WCC (/mm <sup>3</sup> ) x10 <sup>3</sup>       | Control | 16.6  | 5.7   | 2.5  | 9.6   | 23.6  | 11.9  | 23.0  |
|                                                | 20      | 14.9  | 6.7   | 1.5  | 11.7  | 18.2  | 7.4   | 37.4  |
|                                                | 30      | 12.9  | 3.4   | 0.9  | 11.0  | 14.8  | 7.5   | 20.2  |
|                                                | 40      | 17.5  | 6.4   | 2.0  | 12.9  | 22.1  | 10.9  | 27.9  |
| Platelets (/mm <sup>3</sup> ) x10 <sup>3</sup> | Control | 371.8 | 104.1 | 46.6 | 242.5 | 501.1 | 265.0 | 504.0 |
|                                                | 20      | 438.2 | 105.1 | 24.1 | 387.5 | 488.8 | 270.0 | 694.0 |
|                                                | 30      | 467.4 | 159.7 | 42.7 | 375.2 | 559.5 | 231.0 | 824.0 |
|                                                | 40      | 418.4 | 81.9  | 25.9 | 359.8 | 477.0 | 301.0 | 549.0 |
| APTT (sec)                                     | Control | 13.8  | 4.8   | 2.2  | 7.8   | 19.9  | 7.4   | 19.7  |

|                    |         |       |       |      |       |       |       |       |
|--------------------|---------|-------|-------|------|-------|-------|-------|-------|
|                    | 20      | 33.3  | 33.2  | 7.6  | 17.3  | 49.3  | 6.5   | 105.9 |
|                    | 30      | 85.4  | 113.7 | 30.4 | 19.8  | 151.0 | 12.6  | 389.7 |
|                    | 40      | 58.6  | 49.9  | 15.8 | 22.8  | 94.3  | 8.8   | 163.7 |
| PTT (sec)          | Control | 16.2  | 1.9   | 0.9  | 13.8  | 18.6  | 14.6  | 19.4  |
|                    | 20      | 16.2  | 2.5   | 0.6  | 15.0  | 17.4  | 8.2   | 19.8  |
|                    | 30      | 16.7  | 2.0   | 0.5  | 15.6  | 17.8  | 13.0  | 20.4  |
|                    | 40      | 16.5  | 1.0   | 0.3  | 15.8  | 17.2  | 15.2  | 18.4  |
| Activity (%)       | Control | 150.0 | 0.0   | 0.0  | 150.0 | 150.0 | 150.0 | 150.0 |
|                    | 20      | 150.0 | 0.0   | 0.0  | 150.0 | 150.0 | 150.0 | 150.0 |
|                    | 30      | 150.0 | 0.0   | 0.0  | 150.0 | 150.0 | 150.0 | 150.0 |
|                    | 40      | 150.0 | 0.0   | 0.0  | 150.0 | 150.0 | 150.0 | 150.0 |
| INR                | Control | 1.1   | 0.1   | 0.0  | 0.9   | 1.2   | 1.0   | 1.2   |
|                    | 20      | 1.2   | 0.2   | 0.0  | 1.1   | 1.2   | 0.8   | 1.6   |
|                    | 30      | 1.2   | 0.2   | 0.1  | 1.1   | 1.3   | 0.8   | 1.5   |
|                    | 40      | 1.2   | 0.1   | 0.0  | 1.1   | 1.3   | 1.0   | 1.5   |
| Urea (mg/dL)       | Control | 21.7  | 4.5   | 2.0  | 16.2  | 27.3  | 16.7  | 25.6  |
|                    | 20      | 22.2  | 8.1   | 1.9  | 18.3  | 26.2  | 11.7  | 37.5  |
|                    | 30      | 26.1  | 6.7   | 1.7  | 22.4  | 29.8  | 14.6  | 37.7  |
|                    | 40      | 24.2  | 6.2   | 2.0  | 19.7  | 28.6  | 12.6  | 34.0  |
| Creatinine (mg/dL) | Control | 2.3   | 0.4   | 0.2  | 1.8   | 2.7   | 2.1   | 2.9   |



|                |         |        |       |      |       |        |       |        |
|----------------|---------|--------|-------|------|-------|--------|-------|--------|
|                | 20      | 2.3    | 0.7   | 0.2  | 1.9   | 2.6    | 1.0   | 3.3    |
|                | 30      | 2.4    | 0.6   | 0.1  | 2.1   | 2.7    | 1.7   | 3.8    |
|                | 40      | 2.0    | 0.2   | 0.1  | 1.8   | 2.1    | 1.6   | 2.4    |
| AST (UI/I)     | Control | 33.2   | 7.3   | 3.3  | 24.1  | 42.3   | 27.0  | 45.0   |
|                | 20      | 31.1   | 13.2  | 3.0  | 24.7  | 37.5   | 16.0  | 57.0   |
|                | 30      | 26.0   | 10.6  | 2.7  | 20.1  | 31.9   | 15.0  | 47.0   |
|                | 40      | 22.7   | 6.7   | 2.1  | 17.9  | 27.5   | 15.0  | 38.0   |
| ALT (UI/I)     | Control | 36.2   | 11.4  | 5.1  | 22.0  | 50.4   | 17.0  | 47.0   |
|                | 20      | 27.7   | 6.1   | 1.4  | 24.8  | 30.7   | 16.0  | 42.0   |
|                | 30      | 40.3   | 12.8  | 3.3  | 33.2  | 47.4   | 22.0  | 68.0   |
|                | 40      | 24.6   | 10.6  | 3.3  | 17.1  | 32.2   | 1.5   | 39.0   |
| GGT (UI/L)     | Control | 33.4   | 9.3   | 4.2  | 21.8  | 45.0   | 21.0  | 47.0   |
|                | 20      | 34.3   | 11.4  | 2.6  | 28.8  | 39.7   | 11.0  | 53.0   |
|                | 30      | 31.6   | 9.3   | 2.4  | 26.4  | 36.8   | 16.0  | 50.0   |
|                | 40      | 31.1   | 7.7   | 2.4  | 25.6  | 36.6   | 17.0  | 41.0   |
| Glucose (g/dl) | Control | 93.2   | 37.0  | 16.6 | 47.2  | 139.2  | 56.0  | 150.0  |
|                | 20      | 72.6   | 36.3  | 8.3  | 55.1  | 90.1   | 25.0  | 172.0  |
|                | 30      | 99.7   | 22.0  | 5.7  | 87.5  | 111.9  | 63.0  | 136.0  |
|                | 40      | 131.5  | 76.2  | 24.1 | 77.0  | 186.0  | 32.0  | 296.0  |
| LDH (U/L)      | Control | 1089.8 | 190.3 | 85.1 | 853.6 | 1326.0 | 896.0 | 1354.0 |

|                          |         |        |       |       |       |        |       |        |
|--------------------------|---------|--------|-------|-------|-------|--------|-------|--------|
|                          | 20      | 1122.5 | 532.3 | 122.1 | 865.9 | 1379.0 | 631.0 | 2313.0 |
|                          | 30      | 1193.4 | 652.2 | 174.3 | 816.8 | 1569.9 | 528.0 | 3061.0 |
|                          | 40      | 1246.4 | 654.6 | 207.0 | 778.1 | 1714.7 | 706.0 | 2667.0 |
| ALP (U/L)                | Control | 443.4  | 193.7 | 86.6  | 202.9 | 683.9  | 220.0 | 659.0  |
|                          | 20      | 309.7  | 66.8  | 15.7  | 276.5 | 342.9  | 184.0 | 404.0  |
|                          | 30      | 304.9  | 82.6  | 21.3  | 259.1 | 350.6  | 165.0 | 462.0  |
|                          | 40      | 326.8  | 82.2  | 26.0  | 268.0 | 385.6  | 223.0 | 445.0  |
| Total bilirubin (umol/L) | Control | 4.1    | 2.1   | 1.0   | 1.4   | 6.8    | 1.0   | 6.2    |
|                          | 20      | 3.4    | 1.6   | 0.4   | 2.6   | 4.1    | 1.0   | 6.0    |
|                          | 30      | 4.4    | 2.2   | 0.6   | 3.1   | 5.6    | 1.5   | 8.2    |
|                          | 40      | 5.5    | 3.8   | 1.2   | 2.8   | 8.2    | 0.0   | 11.3   |
| Lipase U/L               | Control | 3.7    | 0.7   | 0.3   | 2.8   | 4.5    | 3.0   | 4.5    |
|                          | 20      | 6.6    | 2.6   | 0.6   | 5.4   | 7.9    | 4.1   | 16.5   |
|                          | 30      | 8.0    | 2.9   | 0.7   | 6.4   | 9.6    | 4.7   | 14.6   |
|                          | 40      | 9.1    | 6.0   | 1.9   | 4.8   | 13.3   | 4.6   | 22.9   |
| CRP (mg/L)               | Control | 5.6    | 4.2   | 1.9   | 0.4   | 10.7   | 0.7   | 10.8   |
|                          | 20      | 3.9    | 2.7   | 0.6   | 2.6   | 5.2    | 0.0   | 10.6   |
|                          | 30      | 1.6    | 2.2   | 0.6   | 0.4   | 2.9    | 0.0   | 8.0    |
|                          | 40      | 4.0    | 4.1   | 1.3   | 1.1   | 6.9    | 0.0   | 13.4   |
| Lactate (mmol/L)         | Control |        |       |       |       |        |       |        |

|               |         |        |       |       |         |        |        |        |
|---------------|---------|--------|-------|-------|---------|--------|--------|--------|
|               | 20      | 3.6    | 1.7   | 0.6   | 2.2     | 4.9    | 1.6    | 6.0    |
|               | 30      | 4.0    | 2.0   | 0.9   | 1.6     | 6.4    | 1.7    | 7.0    |
|               | 40      | 4.2    | 2.5   | 0.8   | 2.4     | 6.0    | 0.1    | 9.2    |
| Amylase (U/L) | Control |        |       |       |         |        |        |        |
|               | 20      | 1236.7 | 353.8 | 133.7 | 909.5   | 1563.9 | 718.0  | 1575.0 |
|               | 30      |        |       |       |         |        |        |        |
|               | 40      | 1794.0 | 598.2 | 423.0 | -3580.7 | 7168.7 | 1371.0 | 2217.0 |
| Weight (kg)   | Control | 22.7   | 2.4   | 1.1   | 19.7    | 25.6   | 19.4   | 24.7   |
|               | 20      | 22.6   | 3.0   | 0.7   | 21.2    | 24.0   | 17.3   | 28.0   |
|               | 30      | 25.1   | 4.8   | 1.2   | 22.4    | 27.8   | 20.0   | 33.0   |
|               | 40      | 26.1   | 2.3   | 0.7   | 24.5    | 27.7   | 21.7   | 28.0   |

Table S1. Statistical analysis of pigs in groups according to intra-abdominal pressure.

|                                |                | ANOVA          |      |             |     |      |
|--------------------------------|----------------|----------------|------|-------------|-----|------|
|                                |                | Sum of Squares | df   | Mean Square | F   | Sig. |
| Heart rate (beats/min)         | Between Groups | 6605.8         | 3.0  | 2201.9      | 1.9 | 0.1  |
|                                | Within Groups  | 51810.4        | 45.0 | 1151.3      |     |      |
| Respiratory rate (breaths/min) | Between Groups | 119.9          | 3.0  | 40.0        | 0.5 | 0.7  |
|                                | Within Groups  | 3525.2         | 45.0 | 78.3        |     |      |
| Systolic blood pressure (mmHg) | Between Groups | 3224.2         | 3.0  | 1074.7      | 7.7 | 0.0  |

|                                 |                |         |      |        |      |     |
|---------------------------------|----------------|---------|------|--------|------|-----|
|                                 | Within Groups  | 5575.5  | 40.0 | 139.4  |      |     |
| Diastolic blood pressure (mmHg) | Between Groups | 358.3   | 3.0  | 119.4  | 1.4  | 0.3 |
|                                 | Within Groups  | 3528.6  | 41.0 | 86.1   |      |     |
| MAP (mmHg)                      | Between Groups | 1670.0  | 3.0  | 556.7  | 1.3  | 0.3 |
|                                 | Within Groups  | 19306.0 | 45.0 | 429.0  |      |     |
| PgCO <sub>2</sub> (Kpa)         | Between Groups | 126.2   | 3.0  | 42.1   | 9.7  | 0.0 |
|                                 | Within Groups  | 187.1   | 43.0 | 4.4    |      |     |
| PgCO <sub>2</sub> (mmHg)        | Between Groups | 7097.6  | 3.0  | 2365.9 | 9.7  | 0.0 |
|                                 | Within Groups  | 10525.5 | 43.0 | 244.8  |      |     |
| P(g-Et)CO <sub>2</sub> (Kpa)    | Between Groups | 184.9   | 3.0  | 61.6   | 12.4 | 0.0 |
|                                 | Within Groups  | 213.9   | 43.0 | 5.0    |      |     |
| pH (gastric tonometry)          | Between Groups | 0.3     | 3.0  | 0.1    | 14.6 | 0.0 |
|                                 | Within Groups  | 0.3     | 42.0 | 0.0    |      |     |
| EtCO <sub>2</sub> (mmHg)        | Between Groups | 3661.6  | 3.0  | 1220.5 | 7.7  | 0.0 |
|                                 | Within Groups  | 6818.9  | 43.0 | 158.6  |      |     |
| pCO <sub>2</sub> (gap) (Kpa)    | Between Groups | 3876.0  | 3.0  | 1292.0 | 11.4 | 0.0 |
|                                 | Within Groups  | 5117.5  | 45.0 | 113.7  |      |     |
| BIS                             | Between Groups | 1859.1  | 3.0  | 619.7  | 0.9  | 0.5 |
|                                 | Within Groups  | 31436.0 | 45.0 | 698.6  |      |     |
| Blood temp (°C)                 | Between Groups | 29.1    | 3.0  | 9.7    | 10.3 | 0.0 |

|                                                |                |             |      |           |      |     |
|------------------------------------------------|----------------|-------------|------|-----------|------|-----|
|                                                | Within Groups  | 37.5        | 40.0 | 0.9       |      |     |
| PCCO (L/min)                                   | Between Groups | 1.5         | 3.0  | 0.5       | 1.3  | 0.3 |
|                                                | Within Groups  | 16.7        | 45.0 | 0.4       |      |     |
| PCCI (l/min/m <sup>2</sup> )                   | Between Groups | 11.6        | 3.0  | 3.9       | 5.5  | 0.0 |
|                                                | Within Groups  | 32.0        | 45.0 | 0.7       |      |     |
| CVP (mmHg)                                     | Between Groups | 1.8         | 3.0  | 0.6       | 0.2  | 0.9 |
|                                                | Within Groups  | 129.6       | 45.0 | 2.9       |      |     |
| PPV (%)                                        | Between Groups | 610.0       | 3.0  | 203.3     | 8.3  | 0.0 |
|                                                | Within Groups  | 885.4       | 36.0 | 24.6      |      |     |
| SV (ml)                                        | Between Groups | 392.1       | 3.0  | 130.7     | 7.4  | 0.0 |
|                                                | Within Groups  | 798.7       | 45.0 | 17.7      |      |     |
| SVI (ml/m <sup>2</sup> )                       | Between Groups | 2162.1      | 3.0  | 720.7     | 20.5 | 0.0 |
|                                                | Within Groups  | 1578.3      | 45.0 | 35.1      |      |     |
| SVR (dyn/s/cm <sup>-5</sup> )                  | Between Groups | 1694875.4   | 3.0  | 564958.5  | 0.5  | 0.7 |
|                                                | Within Groups  | 52409070.0  | 44.0 | 1191115.2 |      |     |
| SVR calculated (dyn/s/cm <sup>-5</sup> )       | Between Groups | 12339352.6  | 3.0  | 4113117.5 | 1.1  | 0.4 |
|                                                | Within Groups  | 168691038.2 | 45.0 | 3748689.7 |      |     |
| SVRI (dyn/s/cm <sup>-5</sup> /m <sup>2</sup> ) | Between Groups | 14866759.1  | 3.0  | 4955586.4 | 2.5  | 0.1 |
|                                                | Within Groups  | 88653808.9  | 45.0 | 1970084.6 |      |     |
| dPmx (mmHg/s)                                  | Between Groups | 194234.1    | 3.0  | 64744.7   | 0.9  | 0.5 |

|                                              |                |           |      |         |      |     |
|----------------------------------------------|----------------|-----------|------|---------|------|-----|
|                                              | Within Groups  | 3266595.0 | 45.0 | 72591.0 |      |     |
| SVV (%)                                      | Between Groups | 786.8     | 3.0  | 262.3   | 19.3 | 0.0 |
|                                              | Within Groups  | 543.8     | 40.0 | 13.6    |      |     |
| FiO <sub>2</sub> (%)                         | Between Groups | 494.3     | 3.0  | 164.8   | 2.2  | 0.1 |
|                                              | Within Groups  | 3395.5    | 45.0 | 75.5    |      |     |
| Peak pulmonary pressure (cmH <sub>2</sub> O) | Between Groups | 2225.0    | 3.0  | 741.7   | 31.0 | 0.0 |
|                                              | Within Groups  | 1076.7    | 45.0 | 23.9    |      |     |
|                                              | Total          | 3301.7    | 48.0 |         |      |     |
| Mean pulmonary pressure (cmH <sub>2</sub> O) | Between Groups | 37.9      | 3.0  | 12.6    | 14.7 | 0.0 |
|                                              | Within Groups  | 38.5      | 45.0 | 0.9     |      |     |
| Plateau pressure (cmH <sub>2</sub> O)        | Between Groups | 2290.8    | 3.0  | 763.6   | 29.6 | 0.0 |
|                                              | Within Groups  | 1160.8    | 45.0 | 25.8    |      |     |
| PEEP (cmH <sub>2</sub> O)                    | Between Groups | 4.6       | 3.0  | 1.5     | 7.6  | 0.0 |
|                                              | Within Groups  | 9.1       | 45.0 | 0.2     |      |     |
| Compliance (ml/cm/H <sub>2</sub> O)          | Between Groups | 481.3     | 3.0  | 160.4   | 47.1 | 0.0 |
|                                              | Within Groups  | 153.2     | 45.0 | 3.4     |      |     |
| Compliance static (ml/cm/H <sub>2</sub> O)   | Between Groups | 534.6     | 3.0  | 178.2   | 49.8 | 0.0 |
|                                              | Within Groups  | 161.0     | 45.0 | 3.6     |      |     |
| Compliance dynamic (ml/cm/H <sub>2</sub> O)  | Between Groups | 447.7     | 3.0  | 149.2   | 50.4 | 0.0 |
|                                              | Within Groups  | 133.2     | 45.0 | 3.0     |      |     |

|                                            |                |          |      |         |       |     |
|--------------------------------------------|----------------|----------|------|---------|-------|-----|
| VT inspiratory (ml)                        | Between Groups | 53158.1  | 3.0  | 17719.4 | 8.1   | 0.0 |
|                                            | Within Groups  | 97948.1  | 45.0 | 2176.6  |       |     |
| VT expiratory (ml)                         | Between Groups | 56222.4  | 3.0  | 18740.8 | 9.2   | 0.0 |
|                                            | Within Groups  | 91555.7  | 45.0 | 2034.6  |       |     |
| MV inspiratory (l/min)                     | Between Groups | 9.4      | 3.0  | 3.1     | 7.3   | 0.0 |
|                                            | Within Groups  | 19.3     | 45.0 | 0.4     |       |     |
| MV expiratory (l/min)                      | Between Groups | 10.2     | 3.0  | 3.4     | 8.2   | 0.0 |
|                                            | Within Groups  | 18.7     | 45.0 | 0.4     |       |     |
| Airway resistance (cmH <sub>2</sub> O/l/s) | Between Groups | 97.9     | 3.0  | 32.6    | 3.8   | 0.0 |
|                                            | Within Groups  | 388.5    | 45.0 | 8.6     |       |     |
| Respiratory flow (ml/s)                    | Between Groups | 12153.1  | 3.0  | 4051.0  | 1.0   | 0.4 |
|                                            | Within Groups  | 173841.2 | 45.0 | 3863.1  |       |     |
| Glomerular filtration -TP (mmHg)           | Between Groups | 22641.6  | 3.0  | 7547.2  | 25.6  | 0.0 |
|                                            | Within Groups  | 12385.7  | 42.0 | 294.9   |       |     |
| IAP TP press (mmHg)                        | Between Groups | 6950.1   | 3.0  | 2316.7  | 111.9 | 0.0 |
|                                            | Within Groups  | 931.3    | 45.0 | 20.7    |       |     |
| Glomerular filtration -TG (mmHg)           | Between Groups | 18149.1  | 3.0  | 6049.7  | 23.9  | 0.0 |
|                                            | Within Groups  | 10622.1  | 42.0 | 252.9   |       |     |
| IAP TG press (mmHg)                        | Between Groups | 5456.6   | 3.0  | 1818.9  | 159.1 | 0.0 |
|                                            | Within Groups  | 514.4    | 45.0 | 11.4    |       |     |

|                                  |                |         |      |        |        |     |
|----------------------------------|----------------|---------|------|--------|--------|-----|
| Glomerular filtration -TV (mmHg) | Between Groups | 18450.8 | 3.0  | 6150.3 | 24.8   | 0.0 |
|                                  | Within Groups  | 10423.4 | 42.0 | 248.2  |        |     |
| IAP TV press (mmHg)              | Between Groups | 4899.8  | 3.0  | 1633.3 | 457.4  | 0.0 |
|                                  | Within Groups  | 160.7   | 45.0 | 3.6    |        |     |
| Mean IAP TP (mmHg)               | Between Groups | 5480.8  | 2.0  | 2740.4 | 247.2  | 0.0 |
|                                  | Within Groups  | 266.1   | 24.0 | 11.1   |        |     |
| Mean IAP TG (mmHg)               | Between Groups | 3799.8  | 2.0  | 1899.9 | 128.2  | 0.0 |
|                                  | Within Groups  | 355.7   | 24.0 | 14.8   |        |     |
| Mean IAP TV (mmHg)               | Between Groups | 3623.8  | 2.0  | 1811.9 | 1099.1 | 0.0 |
|                                  | Within Groups  | 39.6    | 24.0 | 1.6    |        |     |
| IAP mean (mmHg)                  | Between Groups | 3695.1  | 2.0  | 1847.6 | 668.0  | 0.0 |
|                                  | Within Groups  | 66.4    | 24.0 | 2.8    |        |     |
| IAP bias (mmHg)                  | Between Groups | 85.7    | 3.0  | 28.6   | 1.7    | 0.2 |
|                                  | Within Groups  | 761.2   | 45.0 | 16.9   |        |     |
| Urine (ml)                       | Between Groups | 23374.3 | 3.0  | 7791.4 | 7.2    | 0.0 |
|                                  | Within Groups  | 48676.1 | 45.0 | 1081.7 |        |     |
| APP checked (mmHg)               | Between Groups | 7314.8  | 3.0  | 2438.3 | 5.2    | 0.0 |
|                                  | Within Groups  | 21220.3 | 45.0 | 471.6  |        |     |
| Temp (°C)                        | Between Groups | 9.3     | 1.0  | 9.3    | 2.4    | 0.1 |
|                                  | Within Groups  | 42.1    | 11.0 | 3.8    |        |     |



|                            |                |        |      |       |     |     |
|----------------------------|----------------|--------|------|-------|-----|-----|
| pH                         | Between Groups | 0.0    | 3.0  | 0.0   | 1.5 | 0.2 |
|                            | Within Groups  | 0.1    | 45.0 | 0.0   |     |     |
| pCO <sub>2</sub> (Kpa)     | Between Groups | 11.2   | 3.0  | 3.7   | 2.9 | 0.0 |
|                            | Within Groups  | 56.1   | 44.0 | 1.3   |     |     |
| pO <sub>2</sub> (Kpa)      | Between Groups | 2069.6 | 3.0  | 689.9 | 5.3 | 0.0 |
|                            | Within Groups  | 5631.9 | 43.0 | 131.0 |     |     |
| Beecf (mmol/L)             | Between Groups | 72.9   | 3.0  | 24.3  | 2.2 | 0.1 |
|                            | Within Groups  | 464.6  | 43.0 | 10.8  |     |     |
| HCO <sub>3</sub> (mmol/L)  | Between Groups | 86.2   | 3.0  | 28.7  | 3.0 | 0.0 |
|                            | Within Groups  | 411.3  | 43.0 | 9.6   |     |     |
| TCO <sub>2</sub> (mmol/L)  | Between Groups | 1.5    | 3.0  | 0.5   | 0.0 | 1.0 |
|                            | Within Groups  | 1238.5 | 43.0 | 28.8  |     |     |
| SpO <sub>2</sub> (%)       | Between Groups | 0.0    | 3.0  | 0.0   | 3.2 | 0.0 |
|                            | Within Groups  | 0.0    | 43.0 | 0.0   |     |     |
| Sodium (mmol/L)            | Between Groups | 12.3   | 3.0  | 4.1   | 0.8 | 0.5 |
|                            | Within Groups  | 200.9  | 41.0 | 4.9   |     |     |
| Potassium (mmol/L)         | Between Groups | 3.6    | 3.0  | 1.2   | 2.6 | 0.1 |
|                            | Within Groups  | 18.9   | 41.0 | 0.5   |     |     |
| RCC (x10 <sup>6</sup> /uL) | Between Groups | 5.3    | 3.0  | 1.8   | 3.7 | 0.0 |
|                            | Within Groups  | 21.5   | 45.0 | 0.5   |     |     |

|                                                |                |          |      |         |     |     |
|------------------------------------------------|----------------|----------|------|---------|-----|-----|
| Haematocrit (%)                                | Between Groups | 66.6     | 3.0  | 22.2    | 2.5 | 0.1 |
|                                                | Within Groups  | 405.9    | 45.0 | 9.0     |     |     |
| Haemoglobin (g/dl)                             | Between Groups | 11.5     | 3.0  | 3.8     | 4.1 | 0.0 |
|                                                | Within Groups  | 42.4     | 45.0 | 0.9     |     |     |
| MCV (fl)                                       | Between Groups | 13.0     | 3.0  | 4.3     | 0.3 | 0.8 |
|                                                | Within Groups  | 727.0    | 45.0 | 16.2    |     |     |
| MCH (pg)                                       | Between Groups | 4.1      | 3.0  | 1.4     | 0.7 | 0.5 |
|                                                | Within Groups  | 85.2     | 45.0 | 1.9     |     |     |
| MCHC (g/dl)                                    | Between Groups | 23.4     | 3.0  | 7.8     | 9.4 | 0.0 |
|                                                | Within Groups  | 37.4     | 45.0 | 0.8     |     |     |
| WCC (/mm <sup>3</sup> ) x10 <sup>3</sup>       | Between Groups | 141.3    | 3.0  | 47.1    | 1.4 | 0.2 |
|                                                | Within Groups  | 1481.2   | 45.0 | 32.9    |     |     |
| Platelets (/mm <sup>3</sup> ) x10 <sup>3</sup> | Between Groups | 37554.0  | 3.0  | 12518.0 | 0.9 | 0.5 |
|                                                | Within Groups  | 633802.9 | 44.0 | 14404.6 |     |     |
| APTT (sec)                                     | Between Groups | 29967.2  | 3.0  | 9989.1  | 2.1 | 0.1 |
|                                                | Within Groups  | 210278.3 | 44.0 | 4779.1  |     |     |
| PTT (sec)                                      | Between Groups | 2.4      | 3.0  | 0.8     | 0.2 | 0.9 |
|                                                | Within Groups  | 190.7    | 45.0 | 4.2     |     |     |
| Activity (%)                                   | Between Groups | 0.0      | 3.0  | 0.0     |     |     |
|                                                | Within Groups  | 0.0      | 45.0 | 0.0     |     |     |

|                          |                |            |      |          |     |     |
|--------------------------|----------------|------------|------|----------|-----|-----|
| INR                      | Between Groups | 0.1        | 3.0  | 0.0      | 0.8 | 0.5 |
|                          | Within Groups  | 1.5        | 45.0 | 0.0      |     |     |
| Urea (mg/dL)             | Between Groups | 147.4      | 3.0  | 49.1     | 1.0 | 0.4 |
|                          | Within Groups  | 2253.7     | 45.0 | 50.1     |     |     |
| Creatinine (mg/dL)       | Between Groups | 1.2        | 3.0  | 0.4      | 1.2 | 0.3 |
|                          | Within Groups  | 15.0       | 45.0 | 0.3      |     |     |
| AST(UI/l)                | Between Groups | 659.2      | 3.0  | 219.7    | 1.8 | 0.2 |
|                          | Within Groups  | 5364.7     | 45.0 | 119.2    |     |     |
| ALT (UI/l)               | Between Groups | 1997.3     | 3.0  | 665.8    | 6.7 | 0.0 |
|                          | Within Groups  | 4489.4     | 45.0 | 99.8     |     |     |
| GGT (UI/L)               | Between Groups | 92.6       | 3.0  | 30.9     | 0.3 | 0.8 |
|                          | Within Groups  | 4427.4     | 45.0 | 98.4     |     |     |
| Glucose (g/dl)           | Between Groups | 23181.3    | 3.0  | 7727.1   | 3.9 | 0.0 |
|                          | Within Groups  | 88232.7    | 45.0 | 1960.7   |     |     |
| LDH (U/L)                | Between Groups | 140138.7   | 3.0  | 46712.9  | 0.1 | 0.9 |
|                          | Within Groups  | 14630665.2 | 44.0 | 332515.1 |     |     |
| ALP (U/L)                | Between Groups | 80384.2    | 3.0  | 26794.7  | 3.1 | 0.0 |
|                          | Within Groups  | 382286.1   | 44.0 | 8688.3   |     |     |
| Total bilirubin (umol/L) | Between Groups | 30.4       | 3.0  | 10.1     | 1.7 | 0.2 |
|                          | Within Groups  | 261.0      | 45.0 | 5.8      |     |     |

|                  |                |           |      |          |     |     |
|------------------|----------------|-----------|------|----------|-----|-----|
| Lipase U/L       | Between Groups | 111.7     | 3.0  | 37.2     | 3.0 | 0.0 |
|                  | Within Groups  | 561.0     | 45.0 | 12.5     |     |     |
| CRP (mg/L)       | Between Groups | 79.2      | 3.0  | 26.4     | 2.8 | 0.0 |
|                  | Within Groups  | 421.7     | 45.0 | 9.4      |     |     |
| Lactate (mmol/L) | Between Groups | 1.9       | 2.0  | 0.9      | 0.2 | 0.8 |
|                  | Within Groups  | 94.6      | 21.0 | 4.5      |     |     |
| Amylase (U/L)    | Between Groups | 483104.8  | 1.0  | 483104.8 | 3.0 | 0.1 |
|                  | Within Groups  | 1108779.4 | 7.0  | 158397.1 |     |     |
| Weight (kg)      | Between Groups | 107.8     | 3.0  | 35.9     | 2.9 | 0.0 |
|                  | Within Groups  | 554.9     | 45.0 | 12.3     |     |     |

Table S2. ANOVA statistical analysis between the different groups of pigs (grouped according to intra-abdominal pressure).

## Appendix A

### Power calculations

#### Heart rate

A statistical power analysis was performed for sample size estimation, based on data from previous animal studies [1-5]. With an alpha of 0.05 and power = 0.80, the projected sample size needed with this effect size for the endpoint of heart rate was 2. This is based on a starting heart rate of  $105 \pm 10$  with a predicted increase of at least 20%.

#### Mean arterial pressure (MAP)/ systolic blood pressure

A statistical power analysis was performed for sample size estimation, based on data from previous animal studies [1, 2, 3, 5]. With an alpha of 0.05 and power = 0.80, the projected sample size needed with this effect size for the endpoint of blood pressure was 4. This is based on a starting MAP of  $96 \pm 14$  with a predicted increase of at least 20%.

### **Cardiac output**

A statistical power analysis was performed for sample size estimation, based on data from previous animal studies [2, 3, 5, 6]. With an alpha of 0.05 and power = 0.80, the projected sample size needed with this effect size for the endpoint of cardiac output was 3. This is based on a starting CO of  $4.3 \pm 0.5$  with a predicted decrease of at least 20%.

### **Stroke volume index (SVI)**

A statistical power analysis was performed for sample size estimation, based on data from previous animal studies [6]. With an alpha of 0.05 and power = 0.80, the projected sample size needed with this effect size for the endpoint of stroke volume index was 3. This is based on a starting SVI of  $38 \pm 5$  with a predicted decrease of at least 20%.

### **Pulse pressure variation (PPV)**

A statistical power analysis was performed for sample size estimation, based on data from previous animal studies [4-6, 7, 8]. With an alpha of 0.05 and power = 0.80, the projected sample size needed with this effect size for the endpoint of PPV was 2. This is based on a starting PPV of  $13.8 \pm 3.6$  with a predicted increase of at least 50%.

### **Stroke volume variation (SVV)**

A statistical power analysis was performed for sample size estimation, based on data from previous animal studies [6, 7, 9, 10]. With an alpha of 0.05 and power = 0.80, the projected sample size needed with this effect size for the endpoint of SVV was 2. This is based on a starting PPV of  $13.8 \pm 3.6$  with a predicted increase of at least 50%.

### **References:**

1. Jacques, D., Bendjelid, K., Duperret, S., Colling, J., Piriou, V., Viale, J.P. Pulse pressure variation and stroke volume variation during increased intra-abdominal pressure: an experimental study. *Crit Care*. 2011; **15** (1): R33. doi: 10.1186/cc9980. Epub 2011 Jan 19. PMID: 21247472; PMCID: PMC3222069.
2. van Essen, G.J., et al. Cardiovascular Function of Modern Pigs Does not Comply with Allometric Scaling Laws. *Sci Rep*. 2018 Jan 15; **8** (1): 792. doi: 10.1038/s41598-017-18775-z. PMID: 29335617; PMCID: PMC5768797.

3. Mahon, R.T., Ciarlone, G.E., Roney, N.G., Swift, J.M. Cardiovascular Parameters in a Swine Model of Normobaric Hypoxia Treated With 5-Hydroxymethyl-2-Furfural (5-HMF). *Front Physiol.* 2019 Apr 18; **10**: 395. doi: 10.3389/fphys.2019.00395. PMID: 31057414; PMCID: PMC6482156.
4. Renner, J., et al. Influence of increased intra-abdominal pressure on fluid responsiveness predicted by pulse pressure variation and stroke volume variation in a porcine model. *Crit Care Med.* 2009 Feb; **37** (2): 650-8. doi: 10.1097/CCM.0b013e3181959864. PMID: 19114894.
5. Wise, E.S., et al. Hemodynamic Parameters in the Assessment of Fluid Status in a Porcine Hemorrhage and Resuscitation Model. *Anesthesiology.* 2021 Apr 1; **134** (4): 607-616. doi: 10.1097/ALN.0000000000003724. PMID: 33635950; PMCID: PMC7946734.
6. Díaz, F., Erranz, B., Donoso, A., Salomon, T., Cruces, P. Influence of tidal volume on pulse pressure variation and stroke volume variation during experimental intra-abdominal hypertension. *BMC Anesthesiol.* 2015 Sep 22; **15**: 127. doi: 10.1186/s12871-015-0105-x. PMID: 26395001; PMCID: PMC4579832.
7. Duperret, S., et al. Increased intra-abdominal pressure affects respiratory variations in arterial pressure in normovolaemic and hypovolaemic mechanically ventilated healthy pigs. *Intensive Care Med.* 2007 Jan; **33** (1): 163-71. doi: 10.1007/s00134-006-0412-2. Epub 2006 Nov 11. PMID: 17102964.
8. Rocha, M.M., Souza, J.M.A., Paola, A.A.V., Carvalho, A.C.C., Barbosa, A.H.P., Costa, G.D.F. Pulse Pressure Variation Patterns in a Swine Model of Hypovolemia under Spontaneous Breathing vs. Invasive Positive-Pressure Ventilation. *MedicalExpress.* 2014; **1** (6): 359-365. doi.org/10.5935/MedicalExpress.2014.06.13
9. Bliacheriene, F., Machado, S.B., Fonseca, E.B., Otsuke, D., Auler, J.O. Jr, Michard, F. Pulse pressure variation as a tool to detect hypovolaemia during pneumoperitoneum. *Acta Anaesthesiol Scand.* 2007 Oct; **51** (9): 1268-72. doi: 10.1111/j.1399-6576.2007.01432.x. Epub 2007 Aug 20. PMID: 17714573.
10. Tournadre, J.P., Allaouchiche, B., Cayrel, V., Mathon, L., Chassard, D. Estimation of cardiac preload changes by systolic pressure variation in pigs undergoing pneumoperitoneum. *Acta Anaesthesiol Scand.* 2000 Mar; **44** (3): 231-5. doi: 10.1034/j.1399-6576.2000.440303.x. PMID: 10714833.
