# Supplementary material for: The pathophysiological impact of intra-abdominal hypertension in pigs
Source: PubMed Central journal article supplement (PMC10461824; doi:10.1371/journal.pone.0290451), 2023-08-28
Supplement: pone.0290451.s003.pdf [file pone.0290451.s003.pdf]

# Exploring the impact of pressure and model on selected physiological measurements on pigs.

W. Cools: Interfaculty Center Data processing and Statistics

January 24, 2020

## introduction

The aim is to re-analyze a dataset on a procedure performed on pigs as described in the draft “Physiological models of intra-abdominal hypertension in a porcine model”.

There are various different physiological parameters that are of interest, originally clustered into 6 groups; cardio, respiratory, metabolic, haematological, gastro-intestinal and renal. These parameters are the dependent variables in current study, primarily considered independent from each other and never considered to serve as predictor. The interdependencies between the physiological parameters will be explored for completeness.

A linear mixed model is used to estimate changes in physiological parameters over time, with measurements every 30 minutes, depending on both the treatment (T3: control, pneu, intest) and the IAP pressure (IAP: 0, 20, 30, 40 mmPh). The mixed model accounts for the dependencies over time and the imbalanced nature of the data with a random intercept for the pig specific averages and a random slope for the pig specific changes over time. Pig specific variances are allowed too. Because not all combinations of treatment and pressure exist, specific contrasts are set up to compare the appropriate subgroups of observations.

Because p-values are only of interest to establish whether a difference or relation exists, not how or how strong, the analysis will also provide visualizations and a discussion on effect sizes and confidence bounds.

## data

A datafile was provided, and on request further refined, which is first briefly discussed.

New names are introduced for convenience of the data analyst. An IAP factor with different levels is included on top of the numeric version `iap`. The pig identification is turned into a factor. The variable `dead` is defined as true or false. The time variable is specified as such. Some issues of the first draft are briefly listed for completeness, `pgEtco2` included `>26` and `>27` which can not be interpreted as numbers, the variable `etco2Hg` included 4 times the word `nd`, the time variable showed a dot instead of a colon once and the total bilirubin a dot was present instead of a comma. The variables that seem to represent averages like `miapTP`, `miapTG`, `miapTV` and `iapMean` were removed because they are just summaries, as were the `lact` and `amyl` variables because they were in general missing.

The link between the original names and the chosen ones can be consulted when necessary in `namesOriginalUsed.txt`.

Table 1: frequency of pigs per treatment, pressure and duration

| cat3        | duration | 0 | 20 | 30 | 40 |
|-------------|----------|---|----|----|----|
| Control     | 3        | 5 | 0  | 0  | 0  |
| Obstruction | 3        | 0 | 5  | 5  | 0  |
| Obstruction | 5        | 0 | 4  | 0  | 0  |
| Pneumo      | 3        | 0 | 5  | 5  | 5  |
| Pneumo      | 5        | 0 | 5  | 5  | 5  |

While some variables are continuous (numerical), several appear to be factors and are therefore defined as such.

There are 49 pigs listed in the data. Pigs appear to be measured in between 6 & 13 times.

It is assumed that the errors in the data are dealt with.

## design

The assignment of pigs to the different treatments, combining condition, pressure and duration, is as follows:

Not all combinations are present, implying missingness by design. Contrasts are therefore required to make the appropriate comparisons, such comparisons typically only make use of a subset of the data. NOTE: It is assumed, until communicated otherwise, that the duration conditions are completely equivalent except for that measurements at the end. In other words, it is assumed that there is no reason to expect that the evolution runs differently at the earlier stages, and the additional measurements in the long duration only serve to show how the evolution continues.

It should now be possible to compare the evolution for each physiological parameter and how it may differ depending on the model and the pressure. The control condition with 0 pressure compares to the obstruction and pneumo conditions with increasing pressure (40 only for pneumo). The obstruction and pneumo compares directly with a pressure of 20 or 30.

## variables

A quick summary is provided as well, which could suggest how each of the measurements is distributed, with asterisks for indicating the factors. Because of the size it is written away in a text file, `descriptives.txt`.

# missing data

The pattern of missingness is included.

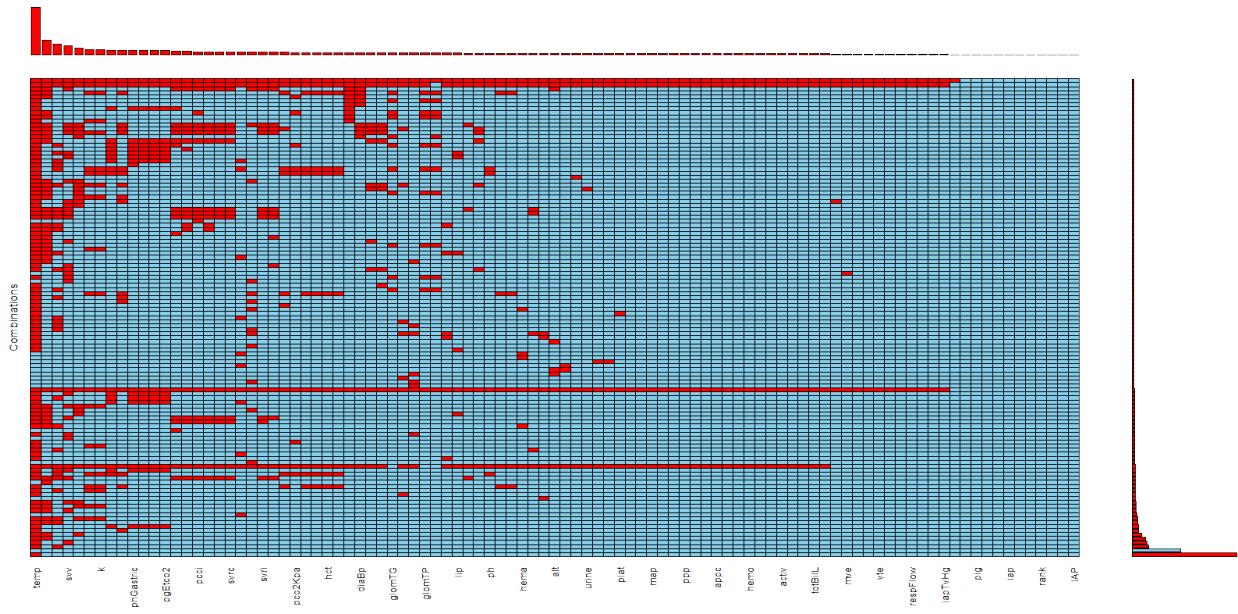

The same type of plot can be generated for the groups control, obstruction and pneumo.

# correlations

The various variables can be correlated, taking into account that some variables are on an interval scale, while others are binary, resulting in a combination of Pearson, polyserial and polychoric correlations.

A heatmap makes exploration of the correlations more convenient.

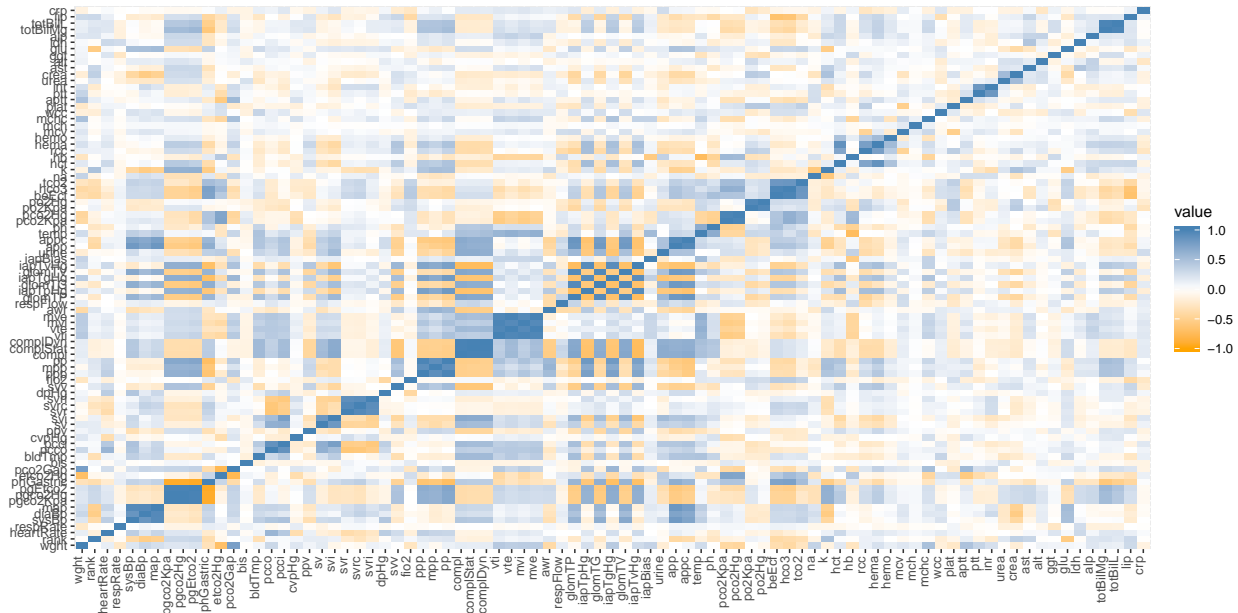

```
## windows
##      2
```

There are some variables that are highly correlated, positively or negatively. A substantive expert probably understands why.

For the smallest subset, the renal data, the following scatterplots result.

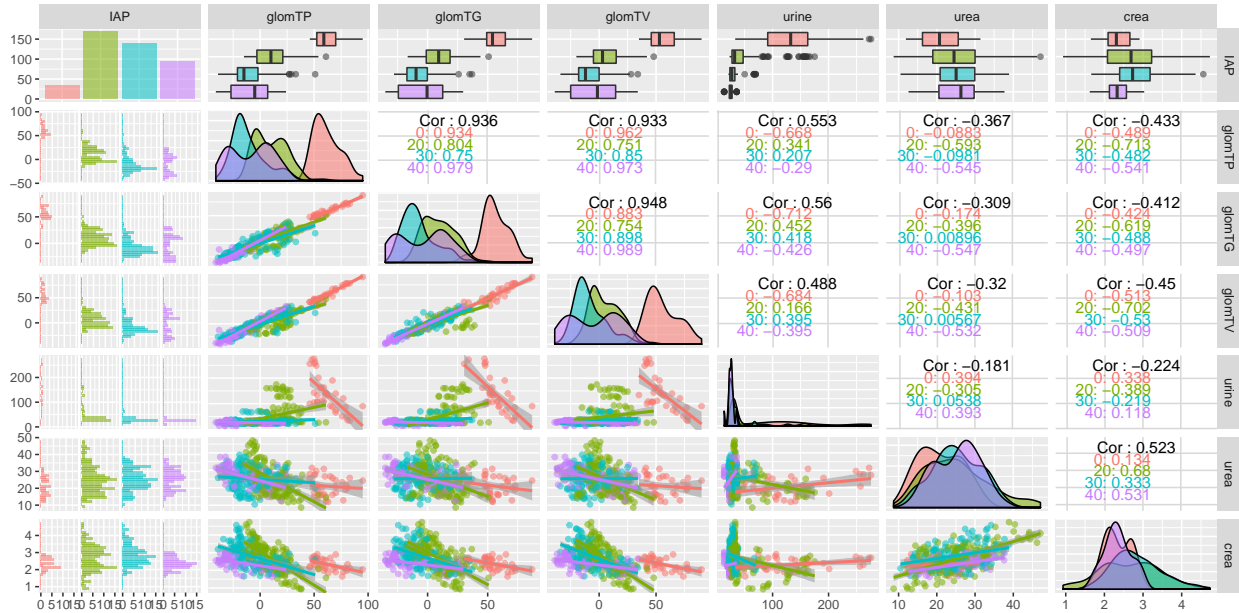

```
## windows
##      2
```

Notice that there are only few IAP equal to 0, but they stand out as the ones that are high on the glom-variables. These glom-variables are strongly inter-related.

This plot and the plots not included in current draft are available as \*.png with names `scatter*`.

In the original data various measurements were extremely correlated, so much that one could hardly argue that they measure a different variable with correlations over .99, for example vte, mve and mvi. It is of no interest to analyze multiple such correlated variables. Current data includes only a subset of these variables.

## evolutions

Because data is observed over time, it is typically interesting to plot the evolution. Whatever the analyses that will be done on these data, these plots provide a very clear view on what to expect by giving a hint on the importance of either pressure or model and the duration.

As an example, the SV is plotted over time. This plot and the plots not included in current draft are available as \*.png with names `evol_*`.

## issues

Note that there are some peculiar measurements, like for the temperature there are very many values 70, and only some others are different. Maybe the measurement should be categorized in two groups or ignored in the analyses, for now they are ignored.

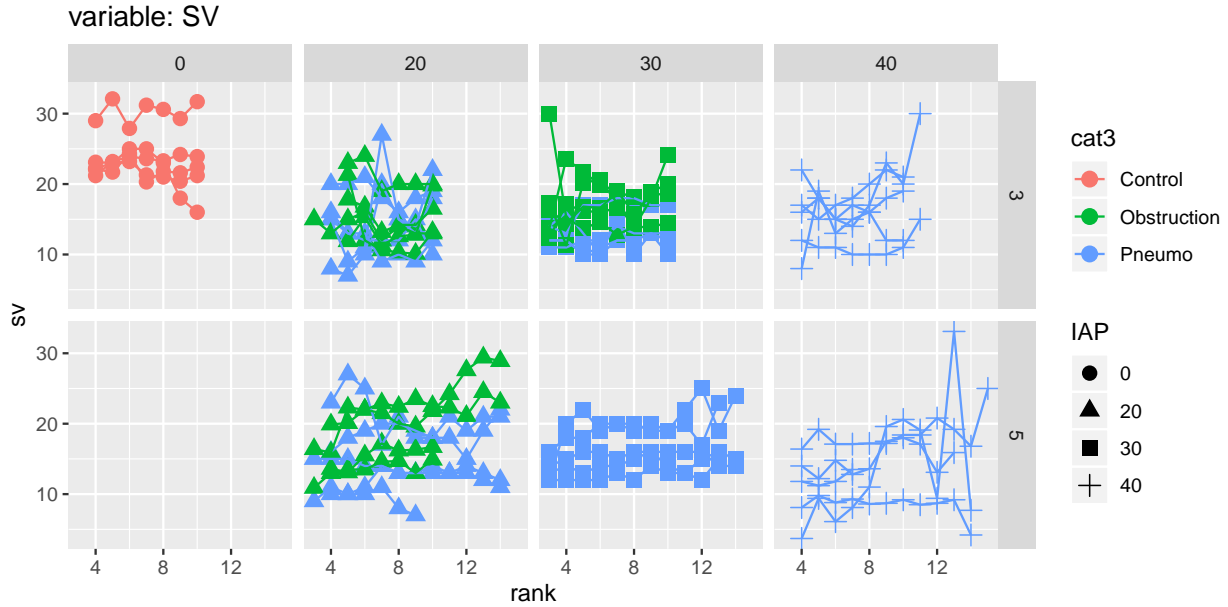

Figure 1: Evolution of SV over time per pig, given a condition and pressure

```
##
## 29.6  30 30.3 30.6 31.1 31.3 31.6 31.7  32 32.1 32.2 32.3 32.4 32.5 32.6 32.9 33.2  37
##  1    1  1  1  1  1  2  1  1  1  1  1  1  1  1  1  1  1  70
```

For the respiratory rate almost all values are 14, while some are clearly higher. Even when categorizing in two groups, only a handful are not 14. This variable is further ignored in the analysis.

```
##
## 14 56 58 59 63 69 71 75
## 423 1 1 1 1 1 1 1
```

There is the active value that may be a typo, and which seems to be useless with only 1 value different from the rest. This variable is fully ignored.

```
##
## 15 150
##  1 429
```

Also the SO2 variable can be ignored.

```
##
## 99 99.9 100
##  5  3 417
```

Various other issues were reported previous draft and are assumed to have been dealt with.

## analysis

Models are build for each of the physiological parameters to explain the observed scores while incorporating the changes over time, using a linear mixed model. When suggested of interest by the AIC the 6 conditions that combine pressure and experimental model, the 2 durations and the actual ranks are used, extended with a random intercept that deals with pig specific averages and possibly with a random slope that deals with pig specific changes over time. Note, the `id` in the datafile is considered a pig identifier, not the pig variable.

Table 2: exemplary contrast matrix

|               | (Intercept) | rank-10 | Obs20 | Obs30 | Pnm20 | Pnm30 | Pnm40 | r10:Obs20 | r10:Obs30 | r10:Pnm20 | r10:Pnm30 | r10:Pnm40 |
|---------------|-------------|---------|-------|-------|-------|-------|-------|-----------|-----------|-----------|-----------|-----------|
| rank          | 0           | 1       | 0     | 0     | 0     | 0     | 0     | 0         | 0         | 0         | 0         | 0         |
| ctrl-obs 20   | 0           | 0       | -1    | 0     | 0     | 0     | 0     | 0         | 0         | 0         | 0         | 0         |
| ctrl-pnm 20   | 0           | 0       | 0     | 0     | -1    | 0     | 0     | 0         | 0         | 0         | 0         | 0         |
| obs 20-30     | 0           | 0       | 1     | -1    | 0     | 0     | 0     | 0         | 0         | 0         | 0         | 0         |
| pnm 20-30     | 0           | 0       | 0     | 0     | 1     | -1    | 0     | 0         | 0         | 0         | 0         | 0         |
| pnm 30-40     | 0           | 0       | 0     | 0     | 0     | 1     | -1    | 0         | 0         | 0         | 0         | 0         |
| x ctrl-obs 20 | 0           | 0       | 0     | 0     | 0     | 0     | 0     | -1        | 0         | 0         | 0         | 0         |
| x ctrl-pnm 20 | 0           | 0       | 0     | 0     | 0     | 0     | 0     | 0         | 0         | -1        | 0         | 0         |
| x obs 20-30   | 0           | 0       | 0     | 0     | 0     | 0     | 0     | 1         | -1        | 0         | 0         | 0         |
| x pnm 20-30   | 0           | 0       | 0     | 0     | 0     | 0     | 0     | 0         | 0         | 1         | -1        | 0         |
| x pnm 30-40   | 0           | 0       | 0     | 0     | 0     | 0     | 0     | 0         | 0         | 0         | 1         | -1        |

For each of the physiological parameters it can now be further investigated how the different pressures and models would result in a different evolution over time. A mixed model is therefore set up, for each. Contrasts allow for specifically testing the different hypotheses of interest which is particularly of interest in current study because only 6 combinations of pressure and model exist and they are are linked to one another in a particular way. Because the different factors of interest are not fully crossed a new variable is constructed that combines the two factors into the following groups: Control\_0, Obstruction\_20, Obstruction\_30, Pneumo\_20, Pneumo\_30, Pneumo\_40.

Because interactions make it difficult to interpret main effects, the ranks are rescaled around 10 which means that even when interactions are present the main effects can be interpreted as differences that exist at rank 10. Note that when interactions are present, that difference is not the same for other ranks.

Of particular interest in the modeling is whether a random intercept suffices, with averages differing over pigs, or that maybe a random slope should be added to allow pig specific changes over time, or that maybe pig specific variances should be added. The expected values are also allowed to differ over time (rank), and weight. Duration is expected to be irrelevant, with evolution being the same for the 3 or the 5 group, except simply lasting longer. It will nevertheless be briefly discussed for each dependent variable if it is of interest but it will not be considered in the final model. Interactions are considered as discussed below, and the intercept is scaled on the rank 10 observation at which main effects are evaluated.

The set of contrasts that is used to make the appropriate comparisons is defined by the matrix below. Because multiple comparisons are made using the same data, a correction for multiple testing is used, in our case the Shaffer correction of p-values:

The interactions should always be looked at first, these are denoted with an x in the matrix. **x pnm 30-40** is the interaction that implies that there is a different evolution over time for the pneumo 30 and pneumo 40 conditions. **x ctrl-pnm 20** is the interaction that implies that there is a different evolution over time for the control and pneum conditions at 20. The same comparison without an x denote the main effects, which are the differences at rank 10 rather than the evolutions.

For each final model the residuals are evaluated visually to verify that there is nothing seriously wrong with the model. The model is then used for prediction and these predictions are plotted in order to help understand the implications of the model.

31 variables are now analyzed with the same subset of alternatives models from which each time one is selected as the most optimal one. The variables are discussed by group and ordered by priority. Note that the core of the analysis is always the same. Note that the dead (big dots) are not considered for estimating the model but are included in the visualization of the data.

## Cardio: highest priority

For the highest priority cardio observations, the following variables are considered consecutively: .

Table 3: variance - covariance: sysBp

|             | Variance | StdDev   |
|-------------|----------|----------|
| (Intercept) | 91.61963 | 9.571814 |
| Residual    | 47.55873 | 6.896284 |

Table 4: estimates: sysBp

|                       | Value   | Std.Error | DF  | t-value | p-value |
|-----------------------|---------|-----------|-----|---------|---------|
| (Intercept)           | 86.783  | 4.841     | 363 | 17.927  | 0.000   |
| r10                   | -0.429  | 0.592     | 363 | -0.724  | 0.470   |
| cndObstruction_20     | -31.144 | 5.846     | 43  | -5.327  | 0.000   |
| cndObstruction_30     | -24.158 | 7.164     | 43  | -3.372  | 0.002   |
| cndPneumo_20          | -32.170 | 5.729     | 43  | -5.616  | 0.000   |
| cndPneumo_30          | -30.219 | 5.763     | 43  | -5.244  | 0.000   |
| cndPneumo_40          | -30.016 | 5.816     | 43  | -5.160  | 0.000   |
| r10:cndObstruction_20 | -1.374  | 0.602     | 363 | -2.280  | 0.023   |
| r10:cndObstruction_30 | -3.838  | 0.869     | 363 | -4.415  | 0.000   |
| r10:cndPneumo_20      | -1.000  | 0.604     | 363 | -1.654  | 0.099   |
| r10:cndPneumo_30      | -0.723  | 0.608     | 363 | -1.189  | 0.235   |
| r10:cndPneumo_40      | -2.499  | 0.638     | 363 | -3.919  | 0.000   |

## sysBp

Different models are compared.

The final model allows for a pig specific intercept and variance, but does not include a pig specific evolution, following the AIC criterion.

The random intercept variance and residual variance are shown (the pig specific variances are not):

Looking at the random intercept variance and the residual variance, there seems to be a strong intra-class correlation, illustrating that different pigs score different in average, conditional on what else is in the model.

The typical output for the mean structure is included:

Simply focusing on a few main questions, contrasts are evaluated:

This leads to the conclusions that the downward evolution is stronger in the pneumo 40 condition compared to the pneumo 30 condition, and a bit stronger for the pneumo 20 condition compared to the pneumo 30 condition too. Either this reflects an optimum or it is just a coincidence that the 30 condition evolution is less strong compared to both 20 and 30. For obstruction the 20 condition shows a stronger downward evolution compared to the 30 condition. No evidence was found for differences in decrease between the 20 conditions, while in the 30 condition there was. At rank 10, the only differences that were detected were between the control and each of both 20 conditions, with the control being higher (at point 0).

The predictions can be visualized as follows:

Some evolutions are well described by the average predicted evolution, but clearly there are various observations that do not in any way reflect the estimated model. Note that the dead (big dots) are not considered for estimating the model but are included in the visualization of the data.

A few check are made to verify the quality of the model. No severe distortions are observed.

Table 5: contrasts: sysBp

|               | Estimate | lwr     | upr    | sigma | tstat  | pvalues |
|---------------|----------|---------|--------|-------|--------|---------|
| rank          | -0.429   | -2.066  | 1.209  | 0.592 | -0.724 | 0.995   |
| ctrl-obs 20   | 31.144   | 14.981  | 47.306 | 5.846 | 5.327  | 0.000   |
| ctrl-pnm 20   | 32.170   | 16.333  | 48.007 | 5.729 | 5.616  | 0.000   |
| obs 20-30     | -6.986   | -24.169 | 10.197 | 6.215 | -1.124 | 0.916   |
| pnm 20-30     | -1.951   | -14.051 | 10.149 | 4.377 | -0.446 | 1.000   |
| pnm 30-40     | -0.204   | -12.620 | 12.213 | 4.491 | -0.045 | 1.000   |
| x ctrl-obs 20 | 1.374    | -0.292  | 3.039  | 0.602 | 2.280  | 0.180   |
| x ctrl-pnm 20 | 1.000    | -0.671  | 2.671  | 0.604 | 1.654  | 0.577   |
| x obs 20-30   | 2.464    | 0.678   | 4.250  | 0.646 | 3.815  | 0.001   |
| x pnm 20-30   | -0.277   | -0.784  | 0.230  | 0.183 | -1.510 | 0.687   |
| x pnm 30-40   | 1.776    | 1.020   | 2.532  | 0.274 | 6.492  | 0.000   |

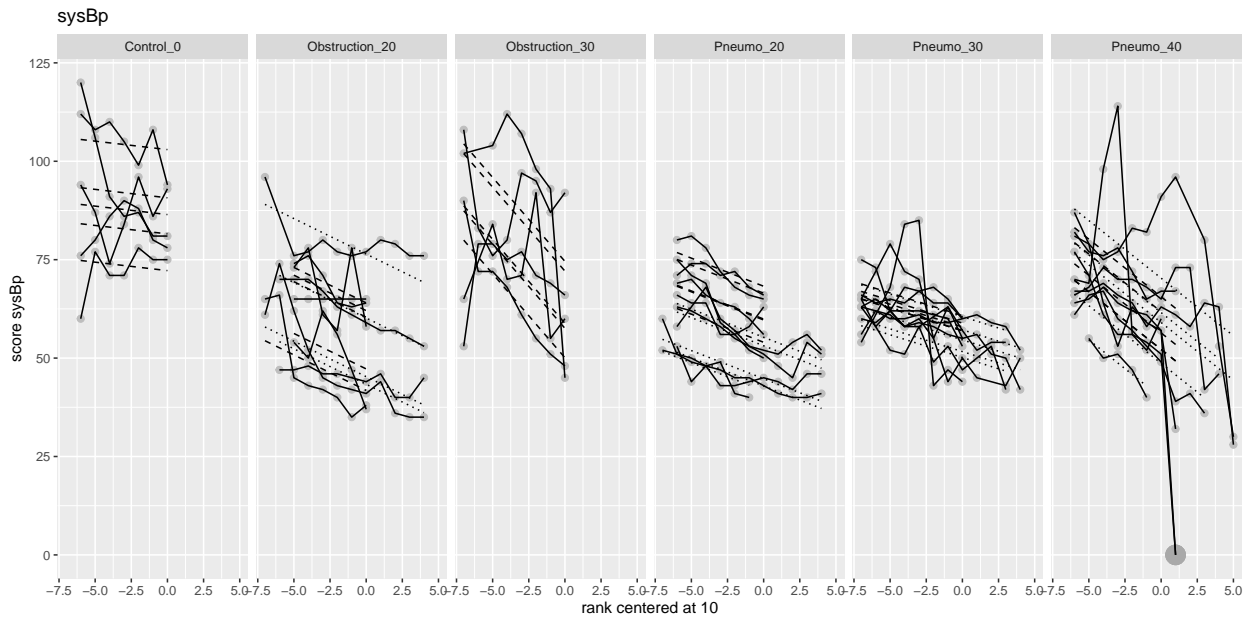

Figure 2: sysBp: predicted evolution and data



Table 6: variance - covariance: diaBp

|             | Variance | StdDev   |
|-------------|----------|----------|
| (Intercept) | 53.91270 | 7.342527 |
| Residual    | 22.26283 | 4.718350 |

Table 7: estimates diaBp

|                       | Value  | Std.Error | DF  | t-value | p-value |
|-----------------------|--------|-----------|-----|---------|---------|
| (Intercept)           | 42.558 | 3.618     | 366 | 11.764  | 0.000   |
| r10                   | -1.386 | 0.397     | 366 | -3.493  | 0.001   |
| cndObstruction_20     | -6.118 | 4.404     | 43  | -1.389  | 0.172   |
| cndObstruction_30     | 5.559  | 5.398     | 43  | 1.030   | 0.309   |
| cndPneumo_20          | -4.806 | 4.312     | 43  | -1.115  | 0.271   |
| cndPneumo_30          | -7.300 | 4.322     | 43  | -1.689  | 0.098   |
| cndPneumo_40          | -6.810 | 4.342     | 43  | -1.568  | 0.124   |
| r10:cndObstruction_20 | -0.238 | 0.410     | 366 | -0.580  | 0.562   |
| r10:cndObstruction_30 | -0.296 | 0.652     | 366 | -0.454  | 0.650   |
| r10:cndPneumo_20      | -0.318 | 0.402     | 366 | -0.791  | 0.429   |
| r10:cndPneumo_30      | 0.021  | 0.403     | 366 | 0.052   | 0.959   |
| r10:cndPneumo_40      | -0.966 | 0.421     | 366 | -2.297  | 0.022   |

Note that for this variable it appears that the evolution runs somewhat different for the duration 3 and 5. This is notable because there should not be a difference, the the two conditions, 3 and 5 should be exactly the samen in their evolution.

## diaBp

Different models are compared.

The final model allows for a pig specific intercept and variance, but does not include a pig specific evolution, following the AIC criterion.

The random intercept variance and residual variance are shown (the pig specific variances are not):

Looking at the random intercept variance and the residual variance, there seems to be a strong intra-class correlation, illustrating that different pigs score different in average, conditional what else is in the model.

The typical output for the mean structure is included:

Simply focusing on a few main questions, contrasts are evaluated:

The data for this variable are very much in line with the previous variable, only less significant results show. The evolution runs different for the pneumo 20 and 30, and 30 and 40, as before. For the obstruction there is no evidence to suggest any difference. At rank 10, there are no differences observed.

The predictions can be visualized as follows:

Table 8: contrasts: diaBp

|               | Estimate | lwr     | upr    | sigma | tstat  | pvalues |
|---------------|----------|---------|--------|-------|--------|---------|
| rank          | -1.386   | -2.483  | -0.289 | 0.397 | -3.493 | 0.005   |
| ctrl-obs 20   | 6.118    | -6.060  | 18.296 | 4.404 | 1.389  | 0.775   |
| ctrl-pnm 20   | 4.806    | -7.118  | 16.730 | 4.312 | 1.115  | 0.921   |
| obs 20-30     | -11.677  | -24.752 | 1.397  | 4.728 | -2.470 | 0.114   |
| pnm 20-30     | 2.494    | -6.720  | 11.708 | 3.332 | 0.749  | 0.993   |
| pnm 30-40     | -0.491   | -9.813  | 8.832  | 3.371 | -0.146 | 1.000   |
| x ctrl-obs 20 | 0.238    | -0.896  | 1.372  | 0.410 | 0.580  | 0.999   |
| x ctrl-pnm 20 | 0.318    | -0.793  | 1.428  | 0.402 | 0.791  | 0.990   |
| x obs 20-30   | 0.058    | -1.402  | 1.518  | 0.528 | 0.110  | 1.000   |
| x pnm 20-30   | -0.339   | -0.600  | -0.077 | 0.094 | -3.584 | 0.003   |
| x pnm 30-40   | 0.987    | 0.553   | 1.422  | 0.157 | 6.288  | 0.000   |

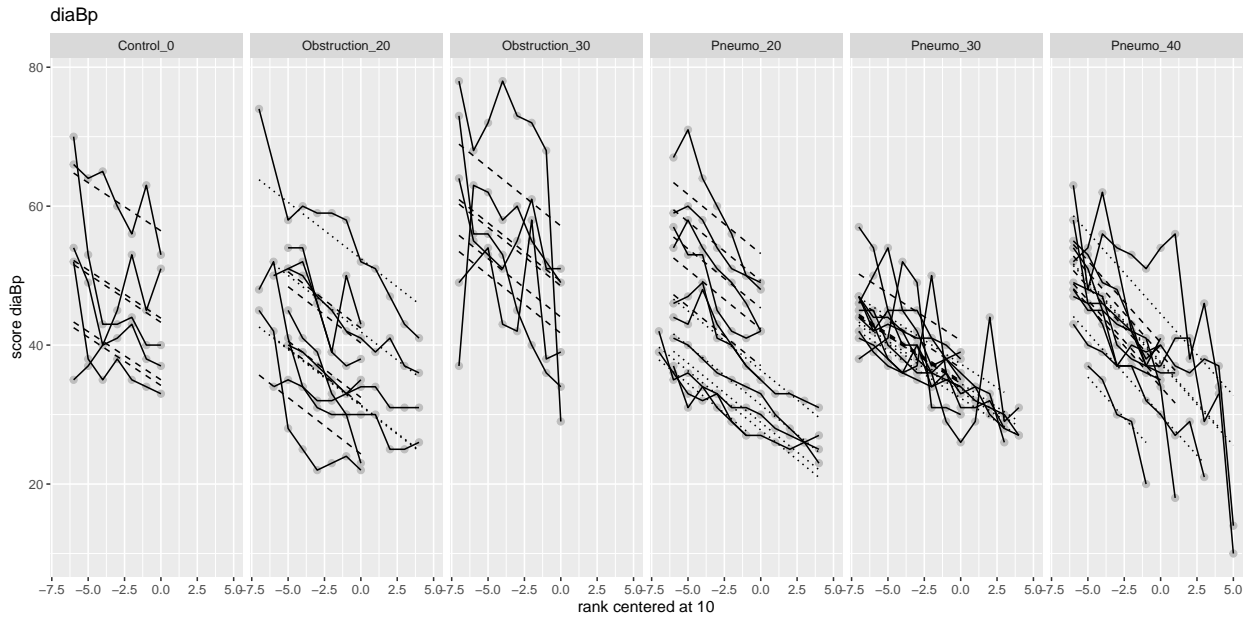

A few checks are made to verify the quality of the model. No severe distortions are observed.

Note that for this variable it appears that the evolution runs somewhat differently for durations 3 and 5.

## pcci

Different models are compared.

The final model allows for a pig-specific intercept and variance, but does not include a pig-specific evolution, following the AIC criterion.

The random intercept variance and residual variance are shown (the pig-specific variances are not):

Looking at the random intercept variance and the residual variance, there seems to be a strong intra-class correlation, illustrating that different pigs score differently in average, conditional on what else is in the model.

The typical output for the mean structure is included:

Table 9: variance - covariance: pcci

|             | Variance  | StdDev    |
|-------------|-----------|-----------|
| (Intercept) | 0.2911834 | 0.5396141 |
| Residual    | 0.1610670 | 0.4013315 |

Table 10: estimates: pcci

|                       | Value  | Std.Error | DF  | t-value | p-value |
|-----------------------|--------|-----------|-----|---------|---------|
| (Intercept)           | 4.718  | 0.250     | 358 | 18.853  | 0.000   |
| r10                   | 0.124  | 0.016     | 358 | 7.559   | 0.000   |
| cndObstruction_20     | -2.424 | 0.314     | 43  | -7.719  | 0.000   |
| cndObstruction_30     | -2.562 | 0.363     | 43  | -7.054  | 0.000   |
| cndPneumo_20          | -2.950 | 0.305     | 43  | -9.674  | 0.000   |
| cndPneumo_30          | -2.376 | 0.308     | 43  | -7.723  | 0.000   |
| cndPneumo_40          | -2.314 | 0.312     | 43  | -7.425  | 0.000   |
| r10:cndObstruction_20 | -0.149 | 0.018     | 358 | -8.107  | 0.000   |
| r10:cndObstruction_30 | -0.196 | 0.024     | 358 | -8.218  | 0.000   |
| r10:cndPneumo_20      | -0.121 | 0.017     | 358 | -7.033  | 0.000   |
| r10:cndPneumo_30      | -0.065 | 0.021     | 358 | -3.122  | 0.002   |
| r10:cndPneumo_40      | -0.102 | 0.020     | 358 | -5.021  | 0.000   |

Simply focusing on a few main questions, contrasts are evaluated:

This leads to the conclusions that the upward evolution is stronger in the pneumo 30 condition compared to the pneumo 20 condition, no differences are suggested for the 40 condition though. The control condition clearly is stronger upward compared to the two 20 conditions, which also shows as differences at rank 10. For obstruction the 20 condition is not suggested to differ from the 30 condition. In the 20 condition, and especially in the 30 condition there is a differential evolution between obstruction and pneumo. A general average evolution appears to differ from 0, when taking all other information into account.

The predictions can be visualized as follows:

Some evolutions are well described by the average predicted evolution, but clearly there are various observations that do not in any way reflect the estimated model.

Table 11: contrasts: pcci

|               | Estimate | lwr    | upr    | sigma | tstat  | pvalues |
|---------------|----------|--------|--------|-------|--------|---------|
| rank          | 0.124    | 0.079  | 0.170  | 0.016 | 7.559  | 0.000   |
| ctrl-obs 20   | 2.424    | 1.552  | 3.296  | 0.314 | 7.719  | 0.000   |
| ctrl-pnm 20   | 2.950    | 2.103  | 3.796  | 0.305 | 9.674  | 0.000   |
| obs 20-30     | 0.138    | -0.763 | 1.039  | 0.325 | 0.425  | 1.000   |
| pnm 20-30     | -0.573   | -1.267 | 0.120  | 0.250 | -2.295 | 0.178   |
| pnm 30-40     | -0.063   | -0.779 | 0.653  | 0.258 | -0.244 | 1.000   |
| x ctrl-obs 20 | 0.149    | 0.098  | 0.200  | 0.018 | 8.107  | 0.000   |
| x ctrl-pnm 20 | 0.121    | 0.073  | 0.168  | 0.017 | 7.033  | 0.000   |
| x obs 20-30   | 0.047    | -0.006 | 0.100  | 0.019 | 2.446  | 0.124   |
| x pnm 20-30   | -0.055   | -0.093 | -0.018 | 0.014 | -4.066 | 0.001   |
| x pnm 30-40   | 0.037    | -0.011 | 0.086  | 0.018 | 2.128  | 0.259   |

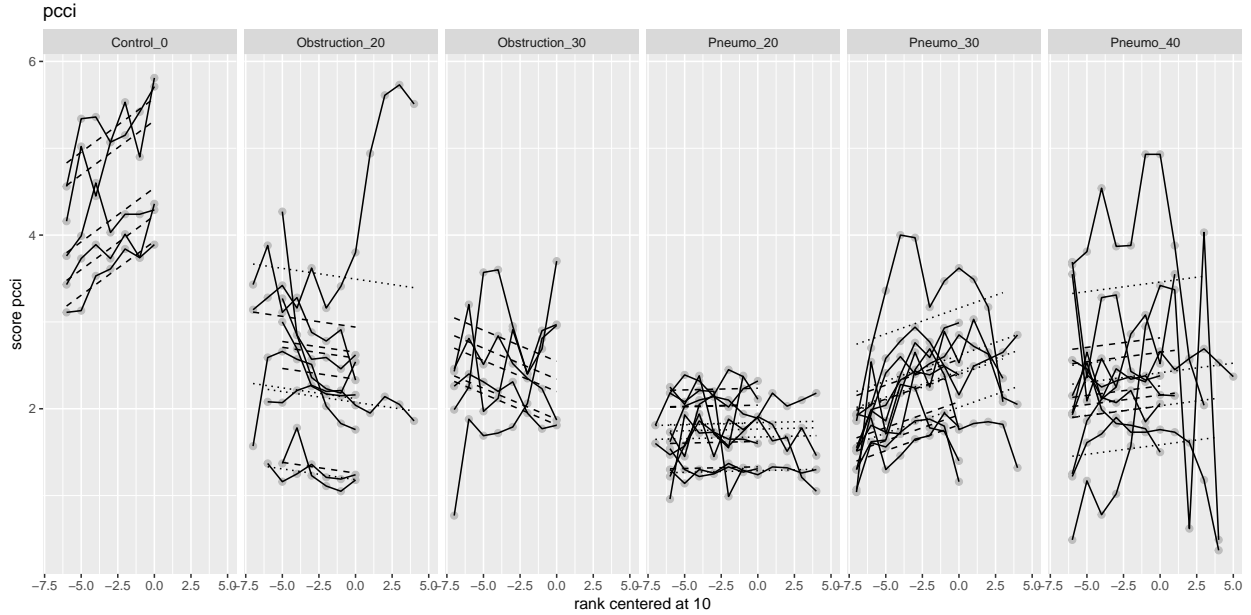

Figure 3: pcci: predicted evolution and data

Table 12: variance - covariance: svi

|             | Variance  | StdDev   |
|-------------|-----------|----------|
| (Intercept) | 22.276264 | 4.719774 |
| Residual    | 7.643896  | 2.764760 |

A few check are made to verify the quality of the model. No severe distortions are observed.

## svi

Different models are compared.

The final model allows for a pig specific intercept and variance, but does not include a pig specific evolution, following the AIC criterion.

The random intercept variance and residual variance are shown (the pig specific variances are not):

Looking at the random intercept variance and the residual variance, there seems to be a strong intra-class correlation, illustrating that different pigs score different in average, conditional what else is in the model.

The typical output for the mean structure is included:

Simply focusing on a few main questions, contrasts are evaluated:

This leads to the conclusions that the obstruction and pneumo only differ in their evolution at 20, not at 30, that the pneumo differs in their evolution between the 20 and 30 condition, not for other combinations. The control, at rank 10, differs from both 20 conditions, obstruction and pneumo, as control scores clearly higher.

The predictions can be visualized as follows:

Table 13: estimates: svi

|                       | Value   | Std.Error | DF  | t-value | p-value |
|-----------------------|---------|-----------|-----|---------|---------|
| (Intercept)           | 41.033  | 2.212     | 355 | 18.549  | 0.000   |
| r10                   | -0.138  | 0.181     | 355 | -0.766  | 0.444   |
| cndObstruction_20     | -16.395 | 2.759     | 43  | -5.942  | 0.000   |
| cndObstruction_30     | -21.252 | 3.134     | 43  | -6.782  | 0.000   |
| cndPneumo_20          | -22.306 | 2.692     | 43  | -8.287  | 0.000   |
| cndPneumo_30          | -19.986 | 2.689     | 43  | -7.433  | 0.000   |
| cndPneumo_40          | -22.333 | 2.707     | 43  | -8.249  | 0.000   |
| r10:cndObstruction_20 | 0.577   | 0.206     | 355 | 2.809   | 0.005   |
| r10:cndObstruction_30 | 0.226   | 0.231     | 355 | 0.975   | 0.330   |
| r10:cndPneumo_20      | -0.130  | 0.195     | 355 | -0.666  | 0.506   |
| r10:cndPneumo_30      | 0.360   | 0.196     | 355 | 1.839   | 0.067   |
| r10:cndPneumo_40      | 0.320   | 0.200     | 355 | 1.606   | 0.109   |

Table 14: contrasts: svi

|               | Estimate | lwr    | upr    | sigma | tstat  | pvalues |
|---------------|----------|--------|--------|-------|--------|---------|
| rank          | -0.138   | -0.659 | 0.382  | 0.181 | -0.766 | 0.997   |
| ctrl-obs 20   | 16.395   | 8.456  | 24.335 | 2.759 | 5.942  | 0.000   |
| ctrl-pnm 20   | 22.306   | 14.562 | 30.051 | 2.692 | 8.287  | 0.000   |
| obs 20-30     | 4.857    | -3.100 | 12.814 | 2.765 | 1.756  | 0.596   |
| pnm 20-30     | -2.320   | -8.549 | 3.909  | 2.165 | -1.072 | 0.967   |
| pnm 30-40     | 2.347    | -3.938 | 8.632  | 2.185 | 1.074  | 0.967   |
| obs pnm 20    | 5.911    | -0.569 | 12.391 | 2.252 | 2.625  | 0.103   |
| obs pnm 30    | -1.266   | -9.020 | 6.488  | 2.695 | -0.470 | 1.000   |
| x ctrl-obs 20 | -0.577   | -1.169 | 0.014  | 0.206 | -2.809 | 0.061   |
| x ctrl-pnm 20 | 0.130    | -0.432 | 0.692  | 0.195 | 0.666  | 0.999   |
| x obs 20-30   | 0.352    | -0.150 | 0.853  | 0.174 | 2.016  | 0.401   |
| x pnm 20-30   | -0.491   | -0.794 | -0.187 | 0.106 | -4.648 | 0.000   |
| x pnm 30-40   | 0.040    | -0.286 | 0.366  | 0.113 | 0.352  | 1.000   |
| x obs pnm 20  | 0.707    | 0.356  | 1.059  | 0.122 | 5.787  | 0.000   |
| x obs pnm 30  | -0.135   | -0.604 | 0.335  | 0.163 | -0.826 | 0.995   |

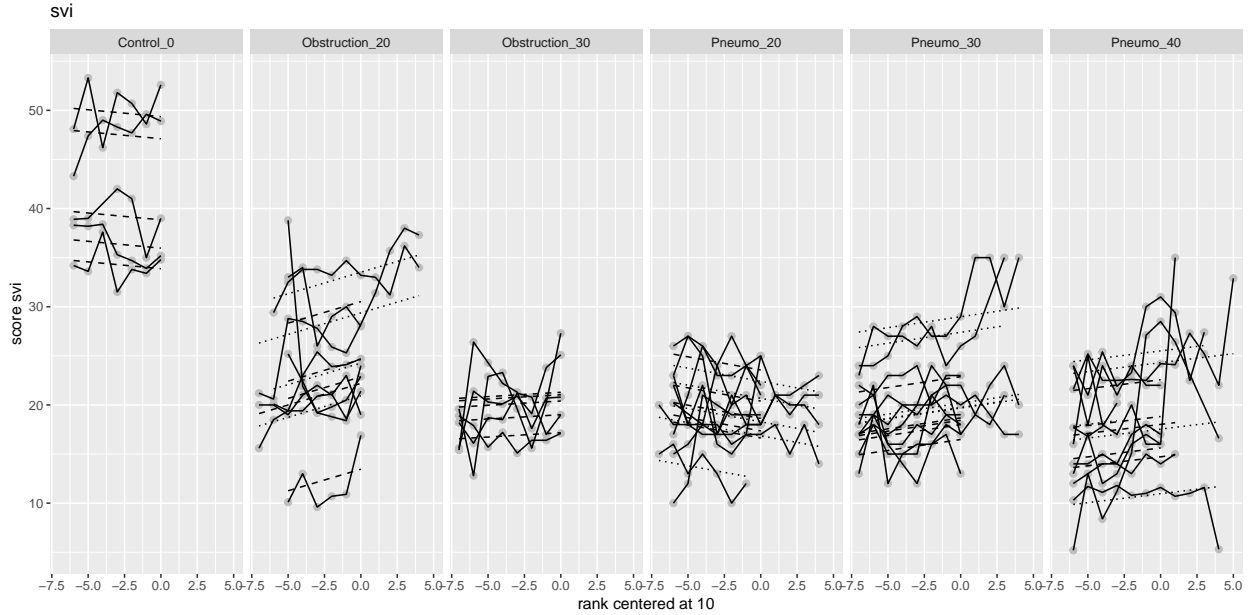

Figure 4: svi: predicted evolution and data

Table 15: variance - covariance: ppv

|             | Variance | StdDev   |
|-------------|----------|----------|
| (Intercept) | 14.34593 | 3.787603 |
| Residual    | 24.36641 | 4.936234 |

Some evolutions are well described by the average predicted evolution, but clearly there are various observations that do not in any way reflect the estimated model.

A few check are made to verify the quality of the model. No severe distortions are observed.

Note that for this variable it appears that the evolution runs somewhat different for the duration 3 and 5.

## Cardio: lowest priority

For the lowest priority cardio observations, the following variables are considered consecutively: heartRate,sysBp,diaBp,map,pcci,cvpHg,ppv,svi,svri,dpHg,svv.

### ppv

Different models are compared.

The final model allows for a pig specific intercept and variance, but does not include a pig specific evolution, following the AIC criterion.

The random intercept variance and residual variance are shown (the pig specific variances are not):

Looking at the random intercept variance and the residual variance, there seems to be weak intra-class correlation, illustrating that different pigs score different in average, conditional what else is in the model.

Table 16: estimates: ppv

|                       | Value  | Std.Error | DF  | t-value | p-value |
|-----------------------|--------|-----------|-----|---------|---------|
| (Intercept)           | 20.779 | 1.851     | 286 | 11.223  | 0.000   |
| r10                   | 1.064  | 0.185     | 286 | 5.757   | 0.000   |
| cndObstruction_20     | 5.341  | 2.301     | 35  | 2.321   | 0.026   |
| cndObstruction_30     | 9.489  | 2.717     | 35  | 3.492   | 0.001   |
| cndPneumo_20          | 5.150  | 2.263     | 35  | 2.275   | 0.029   |
| cndPneumo_30          | 6.066  | 2.313     | 35  | 2.623   | 0.013   |
| cndPneumo_40          | 7.213  | 2.899     | 35  | 2.488   | 0.018   |
| r10:cndObstruction_20 | -0.990 | 0.232     | 286 | -4.270  | 0.000   |
| r10:cndObstruction_30 | -0.307 | 0.296     | 286 | -1.036  | 0.301   |
| r10:cndPneumo_20      | -0.977 | 0.210     | 286 | -4.661  | 0.000   |
| r10:cndPneumo_30      | -0.769 | 0.208     | 286 | -3.701  | 0.000   |
| r10:cndPneumo_40      | -0.707 | 0.220     | 286 | -3.216  | 0.001   |

Table 17: contrasts: ppv

|               | Estimate | lwr     | upr   | sigma | tstat  | pvalues |
|---------------|----------|---------|-------|-------|--------|---------|
| rank          | 1.064    | 0.548   | 1.581 | 0.185 | 5.757  | 0.000   |
| ctrl-obs 20   | -5.341   | -11.769 | 1.087 | 2.301 | -2.321 | 0.175   |
| ctrl-pnm 20   | -5.150   | -11.473 | 1.172 | 2.263 | -2.275 | 0.195   |
| obs 20-30     | -4.147   | -10.888 | 2.593 | 2.413 | -1.719 | 0.550   |
| pnm 20-30     | -0.916   | -6.228  | 4.396 | 1.902 | -0.482 | 1.000   |
| pnm 30-40     | -1.146   | -8.483  | 6.190 | 2.627 | -0.436 | 1.000   |
| x ctrl-obs 20 | 0.990    | 0.342   | 1.637 | 0.232 | 4.270  | 0.000   |
| x ctrl-pnm 20 | 0.977    | 0.392   | 1.563 | 0.210 | 4.661  | 0.000   |
| x obs 20-30   | -0.683   | -1.439  | 0.073 | 0.271 | -2.523 | 0.106   |
| x pnm 20-30   | -0.208   | -0.591  | 0.174 | 0.137 | -1.520 | 0.702   |
| x pnm 30-40   | -0.062   | -0.487  | 0.363 | 0.152 | -0.409 | 1.000   |

The typical output for the mean structure is included:

Simply focusing on a few main questions, contrasts are evaluated:

There seems to be a different evolution for the control versus the two 20 conditions, for pneumo and obstruction. No other differences in evolution are suggested.

The predictions can be visualized as follows:

Table 18: variance - covariance: svv

|             | Variance  | StdDev   |
|-------------|-----------|----------|
| (Intercept) | 5.348691  | 2.312724 |
| Residual    | 23.089485 | 4.805152 |

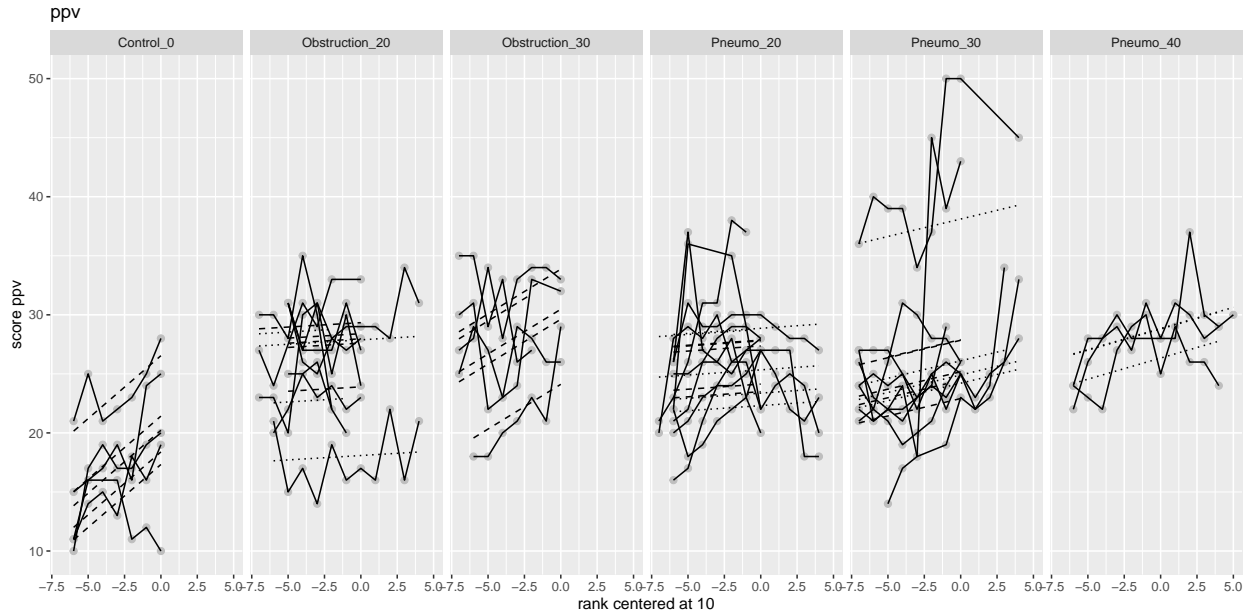

Some evolutions are not so well described by the average predicted evolution.

A few check are made to verify the quality of the model. No severe distortions are observed, except a bit of skewness at the extreme.

## SVV

Different models are compared.

The final model allows for a pig specific intercept and variance, following the AIC criterion. The model with a pig specific slope failed to estimate.

The random intercept variance and residual variance are shown (the pig specific variances are not):

Looking at the random intercept variance and the residual variance, there seems to be minor intra-class correlation, illustrating that different pigs are not suggested to score very different in average, conditional what else is in the model.

The typical output for the mean structure is included:

Simply focusing on a few main questions, contrasts are evaluated:

This variable is atypical in the sense that there are no differences noticed in the evolution over time. There is only a suggested difference between the pneumo 20 and 30 conditions, and between the control and the two 20 conditions. But, as is clear from the visualization, there is one particular pig with extreme values.



Table 19: estimates svv

|                       | Value  | Std.Error | DF  | t-value | p-value |
|-----------------------|--------|-----------|-----|---------|---------|
| (Intercept)           | 18.059 | 1.263     | 315 | 14.296  | 0.000   |
| r10                   | -0.068 | 0.098     | 315 | -0.695  | 0.488   |
| cndObstruction_20     | 6.456  | 1.598     | 43  | 4.041   | 0.000   |
| cndObstruction_30     | 9.023  | 1.823     | 43  | 4.950   | 0.000   |
| cndPneumo_20          | 8.711  | 1.552     | 43  | 5.611   | 0.000   |
| cndPneumo_30          | 14.053 | 1.574     | 43  | 8.925   | 0.000   |
| cndPneumo_40          | 12.437 | 1.543     | 43  | 8.061   | 0.000   |
| r10:cndObstruction_20 | 0.012  | 0.192     | 315 | 0.064   | 0.949   |
| r10:cndObstruction_30 | -0.074 | 0.204     | 315 | -0.363  | 0.717   |
| r10:cndPneumo_20      | 0.206  | 0.168     | 315 | 1.230   | 0.220   |
| r10:cndPneumo_30      | 0.631  | 0.172     | 315 | 3.680   | 0.000   |
| r10:cndPneumo_40      | 0.516  | 0.146     | 315 | 3.531   | 0.000   |

Table 20: contrasts: svv

|               | Estimate | lwr     | upr    | sigma | tstat  | pvalues |
|---------------|----------|---------|--------|-------|--------|---------|
| rank          | -0.068   | -0.343  | 0.207  | 0.098 | -0.695 | 0.997   |
| ctrl-obs 20   | -6.456   | -10.930 | -1.981 | 1.598 | -4.041 | 0.001   |
| ctrl-pnm 20   | -8.711   | -13.059 | -4.364 | 1.552 | -5.611 | 0.000   |
| obs 20-30     | -2.568   | -7.156  | 2.021  | 1.638 | -1.567 | 0.666   |
| pnm 20-30     | -5.341   | -8.990  | -1.692 | 1.303 | -4.099 | 0.000   |
| pnm 30-40     | 1.616    | -2.001  | 5.233  | 1.291 | 1.251  | 0.871   |
| x ctrl-obs 20 | -0.012   | -0.551  | 0.527  | 0.192 | -0.064 | 1.000   |
| x ctrl-pnm 20 | -0.206   | -0.676  | 0.264  | 0.168 | -1.230 | 0.882   |
| x obs 20-30   | 0.086    | -0.595  | 0.768  | 0.243 | 0.354  | 1.000   |
| x pnm 20-30   | -0.425   | -0.974  | 0.123  | 0.196 | -2.172 | 0.247   |
| x pnm 30-40   | 0.115    | -0.383  | 0.613  | 0.178 | 0.648  | 0.998   |

Table 21: variance - covariance: svv

|             | Variance   | StdDev    | Corr   |
|-------------|------------|-----------|--------|
| (Intercept) | 14.4409723 | 3.8001279 | (Intr) |
| rank        | 0.2494442  | 0.4994439 | -0.807 |
| Residual    | 12.8293157 | 3.5818034 |        |

The predictions can be visualized as follows:

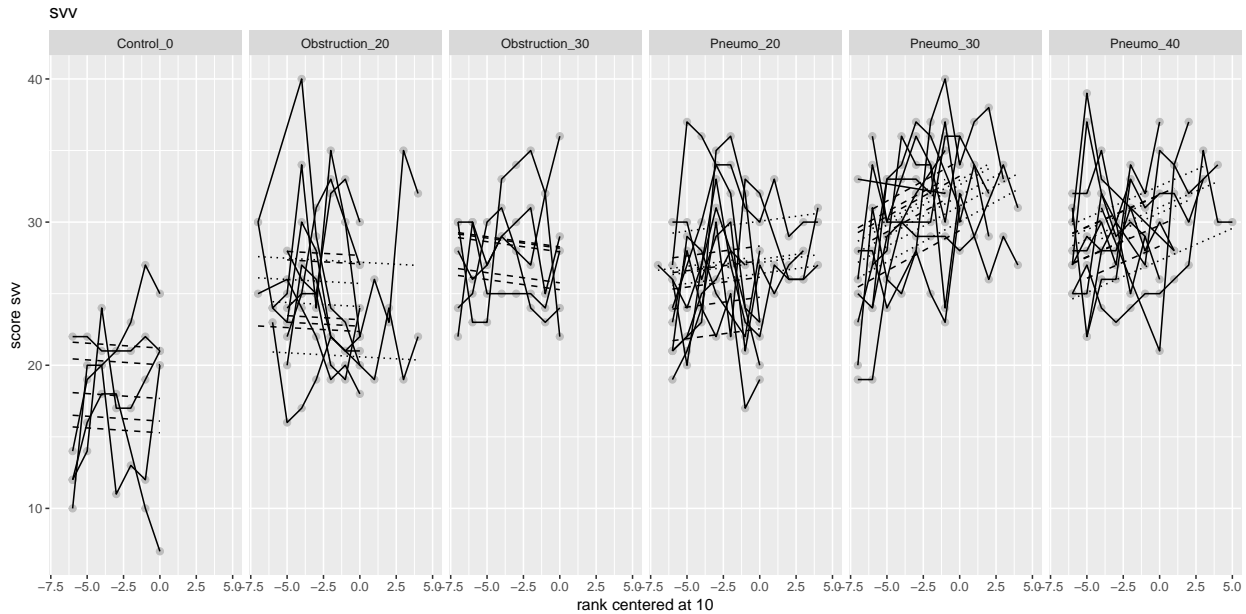

A few check are made to verify the quality of the model. No severe distortions are observed.

Just as a check the model is rerun to verify that without the extreme pig there would not be a different model.

Again, different models are compared.

Now the pig specific slope model does run, and even is best given the AIC criterion. The random intercept variance and slope, and residual variance are shown (the pig specific variances are not):

Looking at the random intercept variance and the residual variance, there seems to be a moderate intra-class correlation, illustrating that different pigs score different in average, conditional what else is in the model. The slope variance is minor.

The typical output for the mean structure is included:

Simply focusing on a few main questions, contrasts are evaluated:

The effects do not change much though, there are no differences noticed in the evolution over time only a suggested difference between the pneumo 20 and 30 conditions, and between the control and the pneumo 20 condition, not with the obstruction 20 condition.

The predictions can be visualized as follows:

Table 22: estimates svv

|                       | Value  | Std.Error | DF  | t-value | p-value |
|-----------------------|--------|-----------|-----|---------|---------|
| (Intercept)           | 19.028 | 1.726     | 315 | 11.023  | 0.000   |
| r10                   | 0.396  | 0.377     | 315 | 1.049   | 0.295   |
| cndObstruction_20     | 5.277  | 2.105     | 43  | 2.507   | 0.016   |
| cndObstruction_30     | 9.306  | 2.408     | 43  | 3.864   | 0.000   |
| cndPneumo_20          | 7.750  | 2.059     | 43  | 3.765   | 0.001   |
| cndPneumo_30          | 13.326 | 2.070     | 43  | 6.438   | 0.000   |
| cndPneumo_40          | 11.362 | 2.071     | 43  | 5.487   | 0.000   |
| r10:cndObstruction_20 | -0.622 | 0.460     | 315 | -1.352  | 0.177   |
| r10:cndObstruction_30 | -0.222 | 0.503     | 315 | -0.441  | 0.659   |
| r10:cndPneumo_20      | -0.303 | 0.442     | 315 | -0.686  | 0.493   |
| r10:cndPneumo_30      | 0.254  | 0.439     | 315 | 0.578   | 0.563   |
| r10:cndPneumo_40      | -0.024 | 0.448     | 315 | -0.054  | 0.957   |

Table 23: contrasts: svv

|               | Estimate | lwr     | upr    | sigma | tstat  | pvalues |
|---------------|----------|---------|--------|-------|--------|---------|
| rank          | 0.396    | -0.644  | 1.436  | 0.377 | 1.049  | 0.919   |
| ctrl-obs 20   | -5.277   | -11.081 | 0.527  | 2.105 | -2.507 | 0.099   |
| ctrl-pnm 20   | -7.750   | -13.426 | -2.074 | 2.059 | -3.765 | 0.002   |
| obs 20-30     | -4.029   | -9.728  | 1.670  | 2.067 | -1.949 | 0.335   |
| pnm 20-30     | -5.576   | -9.990  | -1.162 | 1.601 | -3.483 | 0.005   |
| pnm 30-40     | 1.965    | -2.492  | 6.422  | 1.616 | 1.215  | 0.840   |
| x ctrl-obs 20 | 0.622    | -0.647  | 1.892  | 0.460 | 1.352  | 0.756   |
| x ctrl-pnm 20 | 0.303    | -0.915  | 1.521  | 0.442 | 0.686  | 0.994   |
| x obs 20-30   | -0.400   | -1.572  | 0.772  | 0.425 | -0.942 | 0.954   |
| x pnm 20-30   | -0.557   | -1.441  | 0.328  | 0.321 | -1.734 | 0.479   |
| x pnm 30-40   | 0.278    | -0.630  | 1.186  | 0.329 | 0.844  | 0.976   |

Table 24: variance - covariance: glomTV

|             | Variance  | StdDev    |
|-------------|-----------|-----------|
| (Intercept) | 181.74688 | 13.481353 |
| Residual    | 10.47839  | 3.237035  |

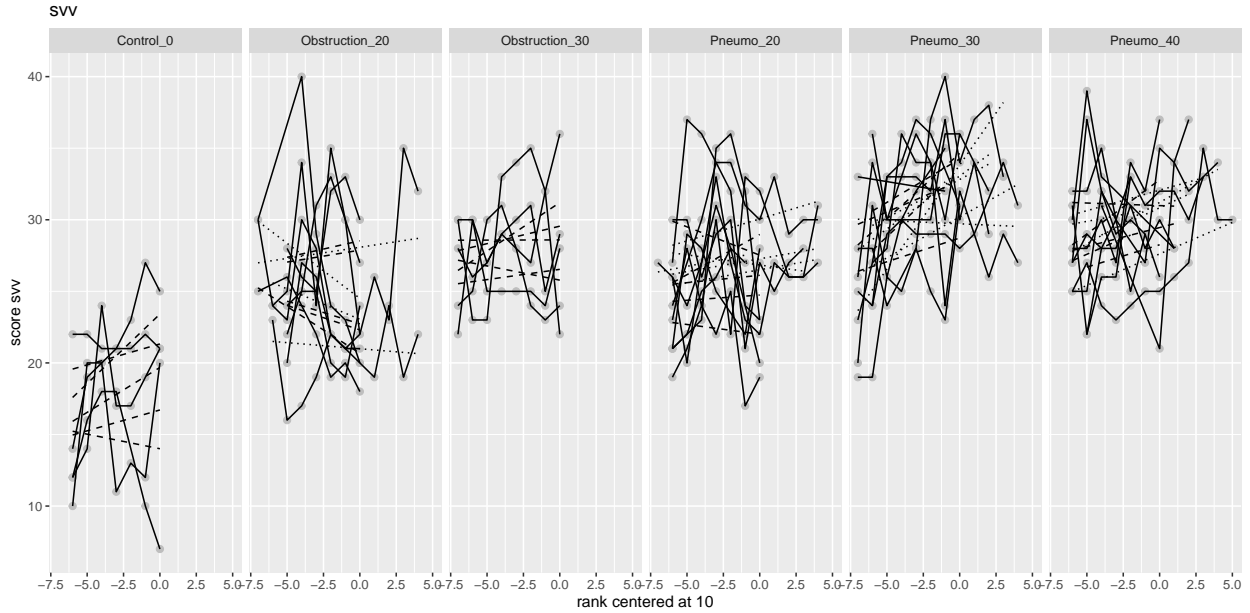

A few check are made to verify the quality of the model. No severe distortions are observed.

## Renal: highest priority

For the highest priority renal observations, the following variables are considered consecutively: .

### glomTV

Different models are compared.

The final model allows for a pig specific intercept and variance, but does not include a pig specific evolution, following the AIC criterion.

The random intercept variance and residual variance are shown (the pig specific variances are not):

Looking at the random intercept variance and the residual variance, there seems to be severe intra-class correlation, illustrating that different pigs score different in average, conditional what else is in the model.

The typical output for the mean structure is included:

Simply focusing on a few main questions, contrasts are evaluated:

It appears that there is stronger downward trend for the pneumo 20 condition, compared to the pneumo 30 one. Visually that is not so obvious though. At rank 10 the control is shown to be higher than the two 20 conditions, and the pneumo 20 is also suggested as higher than the pneumo 30 condition at that rank.

Table 25: estimates: glomTV

|                       | Value   | Std.Error | DF  | t-value | p-value |
|-----------------------|---------|-----------|-----|---------|---------|
| (Intercept)           | 52.957  | 6.257     | 360 | 8.463   | 0.000   |
| r10                   | -0.957  | 0.392     | 360 | -2.445  | 0.015   |
| cndObstruction_20     | -52.290 | 7.723     | 43  | -6.771  | 0.000   |
| cndObstruction_30     | -56.443 | 8.922     | 43  | -6.326  | 0.000   |
| cndPneumo_20          | -49.652 | 7.583     | 43  | -6.547  | 0.000   |
| cndPneumo_30          | -69.706 | 7.594     | 43  | -9.179  | 0.000   |
| cndPneumo_40          | -63.020 | 7.599     | 43  | -8.294  | 0.000   |
| r10:cndObstruction_20 | -0.840  | 0.406     | 360 | -2.067  | 0.039   |
| r10:cndObstruction_30 | -2.035  | 0.582     | 360 | -3.495  | 0.001   |
| r10:cndPneumo_20      | -0.988  | 0.397     | 360 | -2.488  | 0.013   |
| r10:cndPneumo_30      | -0.371  | 0.402     | 360 | -0.924  | 0.356   |
| r10:cndPneumo_40      | -0.760  | 0.416     | 360 | -1.828  | 0.068   |

Table 26: contrasts: glomTV

|               | Estimate | lwr     | upr    | sigma | tstat  | pvalues |
|---------------|----------|---------|--------|-------|--------|---------|
| rank          | -0.957   | -2.041  | 0.126  | 0.392 | -2.445 | 0.122   |
| ctrl-obs 20   | 52.290   | 30.913  | 73.668 | 7.723 | 6.771  | 0.000   |
| ctrl-pnm 20   | 49.652   | 28.661  | 70.643 | 7.583 | 6.547  | 0.000   |
| obs 20-30     | 4.153    | -17.456 | 25.761 | 7.807 | 0.532  | 1.000   |
| pnm 20-30     | 20.054   | 3.246   | 36.861 | 6.072 | 3.303  | 0.009   |
| pnm 30-40     | -6.685   | -23.545 | 10.174 | 6.091 | -1.098 | 0.930   |
| x ctrl-obs 20 | 0.840    | -0.285  | 1.964  | 0.406 | 2.067  | 0.291   |
| x ctrl-pnm 20 | 0.988    | -0.111  | 2.088  | 0.397 | 2.488  | 0.109   |
| x obs 20-30   | 1.195    | -0.035  | 2.425  | 0.444 | 2.690  | 0.063   |
| x pnm 20-30   | -0.617   | -0.928  | -0.306 | 0.112 | -5.486 | 0.000   |
| x pnm 30-40   | 0.389    | -0.073  | 0.852  | 0.167 | 2.329  | 0.163   |

Table 27: variance - covariance: urine

|             | Variance    | StdDev    | Corr   |
|-------------|-------------|-----------|--------|
| (Intercept) | 1158.353685 | 34.034595 | (Intr) |
| rank        | 2.927369    | 1.710956  | -0.001 |
| Residual    | 7.703913    | 2.775592  |        |

The predictions can be visualized as follows:

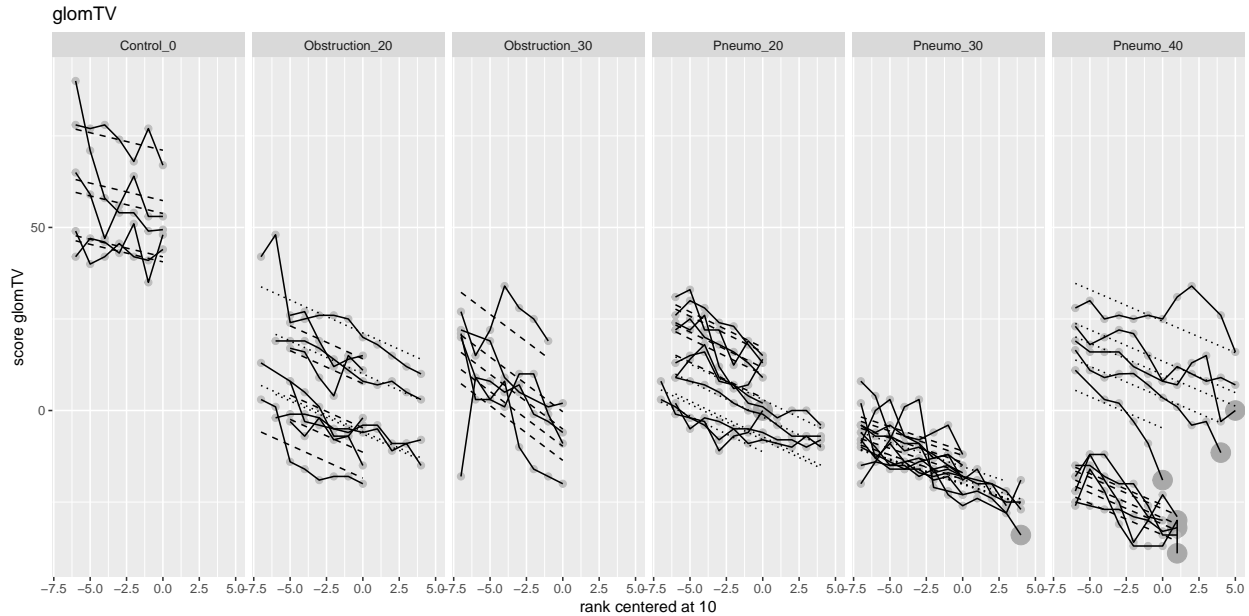

Some evolutions are well described by the average predicted evolution, but some observations are notable, for the obstruction 30, pneumo 30 and pneumo 40 there is each time one single remarkably large value.

A few check are made to verify the quality of the model. No severe distortions are observed.

Note that for this variable it appears that the evolution runs somewhat different for the duration 3 and 5.

## urine

Different models are compared.

The final model allows for a pig specific intercept and slope (the model with pig specific variances did not fit), following the AIC criterion.

The random intercept variance and residual variance are shown:

Looking at the random intercept variance and the residual variance, there seems to be a huge intra-class correlation, illustrating that different pigs score different in average, conditional what else is in the model.

The typical output for the mean structure is included:

Simply focusing on a few main questions, contrasts are evaluated:

Clearly the control is different for this variable, with a differential evolution over time between the control and each of both 20 conditions. The control condition shows a strong increase that is absent in the rest of

Table 28: estimates urine

|                       | Value    | Std.Error | DF  | t-value | p-value |
|-----------------------|----------|-----------|-----|---------|---------|
| (Intercept)           | 172.236  | 17.051    | 370 | 10.101  | 0       |
| r10                   | 11.316   | 0.800     | 370 | 14.139  | 0       |
| cndObstruction_20     | -105.487 | 21.264    | 43  | -4.961  | 0       |
| cndObstruction_30     | -132.126 | 24.112    | 43  | -5.480  | 0       |
| cndPneumo_20          | -117.340 | 20.881    | 43  | -5.619  | 0       |
| cndPneumo_30          | -144.946 | 20.880    | 43  | -6.942  | 0       |
| cndPneumo_40          | -146.448 | 20.881    | 43  | -7.014  | 0       |
| r10:cndObstruction_20 | -9.659   | 0.996     | 370 | -9.700  | 0       |
| r10:cndObstruction_30 | -10.829  | 1.124     | 370 | -9.637  | 0       |
| r10:cndPneumo_20      | -10.006  | 0.976     | 370 | -10.255 | 0       |
| r10:cndPneumo_30      | -10.991  | 0.972     | 370 | -11.305 | 0       |
| r10:cndPneumo_40      | -11.262  | 0.976     | 370 | -11.538 | 0       |

Table 29: contrasts: urine

|               | Estimate | lwr     | upr     | sigma  | tstat  | pvalues |
|---------------|----------|---------|---------|--------|--------|---------|
| rank          | 11.316   | 9.087   | 13.545  | 0.800  | 14.139 | 0.000   |
| ctrl-obs 20   | 105.487  | 46.268  | 164.707 | 21.264 | 4.961  | 0.000   |
| ctrl-pnm 20   | 117.340  | 59.186  | 175.494 | 20.881 | 5.619  | 0.000   |
| obs 20-30     | 26.638   | -32.576 | 85.853  | 21.262 | 1.253  | 0.856   |
| pnm 20-30     | 27.606   | -19.861 | 75.073  | 17.044 | 1.620  | 0.606   |
| pnm 30-40     | 1.502    | -45.965 | 48.969  | 17.044 | 0.088  | 1.000   |
| x ctrl-obs 20 | 9.659    | 6.886   | 12.432  | 0.996  | 9.700  | 0.000   |
| x ctrl-pnm 20 | 10.006   | 7.288   | 12.723  | 0.976  | 10.255 | 0.000   |
| x obs 20-30   | 1.170    | -1.578  | 3.917   | 0.987  | 1.186  | 0.889   |
| x pnm 20-30   | 0.986    | -1.201  | 3.172   | 0.785  | 1.256  | 0.854   |
| x pnm 30-40   | 0.270    | -1.917  | 2.458   | 0.785  | 0.344  | 1.000   |

the conditions. At rank 10, the control condition is in average therefore also higher.

The predictions can be visualized as follows:

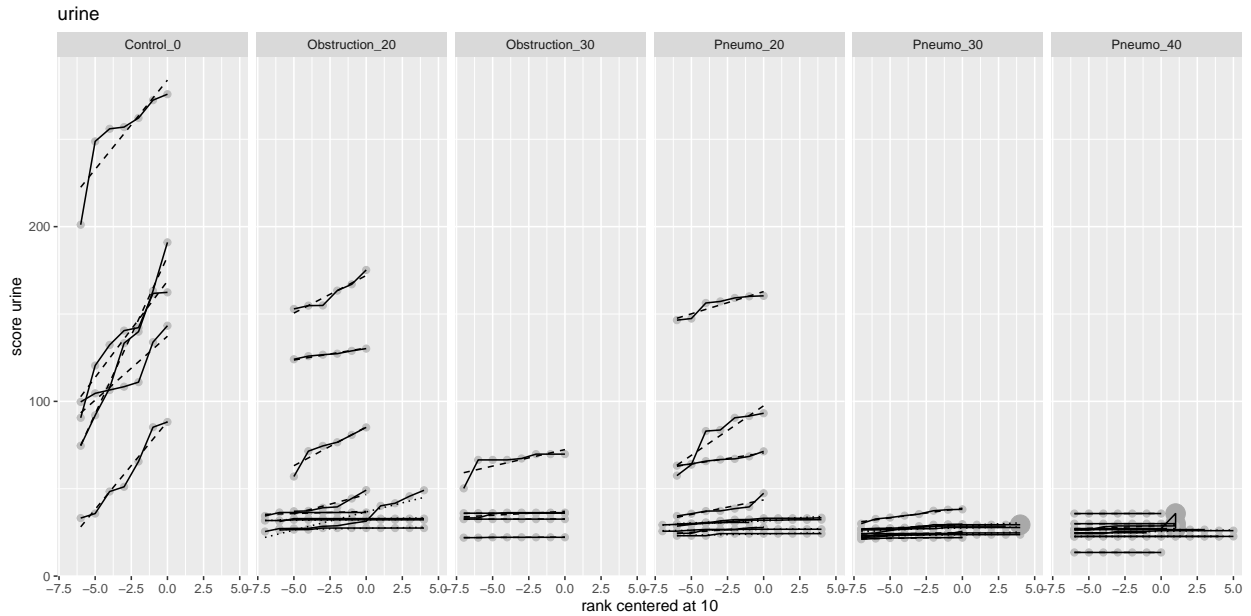

There are some notable observations. In the pneumo 30 and 30 condition there is one pig that scores high, but barely shows evolution just like the rest.

A few checks are made to verify the quality of the model. A few clear issues are suggested, that also were suggested by the plots.

While the majority of the pigs show a constant low score, there are a few but also severe exceptions, same is true for the slopes. In general, for this analysis there is some violation of the assumptions of normality for both the residuals and the random effects. Maybe this analysis should be treated with strong caution. From the visualization it is of course clear that the control is different, without the need for any statistics.

Note that for this variable it appears that the evolution runs somewhat different for the duration 3 and 5.

## Renal: medium priority

For the medium priority renal observations, the following variables are considered consecutively: .

### glomTP

Different models are compared.

The final model allows for a pig specific intercept and variance, but does not include a pig specific evolution, following the AIC criterion.

The random intercept variance and residual variance are shown (the pig specific variances are not):

Looking at the random intercept variance and the residual variance, there seems to be severe intra-class correlation, illustrating that different pigs score different in average, conditional what else is in the model.

The typical output for the mean structure is included:



Table 30: variance - covariance: glomTP

|             | Variance   | StdDev    |
|-------------|------------|-----------|
| (Intercept) | 162.453362 | 12.745719 |
| Residual    | 6.218509   | 2.493694  |

Table 31: estimates: glomTP

|                       | Value   | Std.Error | DF  | t-value | p-value |
|-----------------------|---------|-----------|-----|---------|---------|
| (Intercept)           | 59.722  | 5.926     | 361 | 10.078  | 0.000   |
| r10                   | -0.700  | 0.365     | 361 | -1.920  | 0.056   |
| cndObstruction_20     | -47.903 | 7.312     | 43  | -6.551  | 0.000   |
| cndObstruction_30     | -60.566 | 8.454     | 43  | -7.165  | 0.000   |
| cndPneumo_20          | -56.496 | 7.178     | 43  | -7.870  | 0.000   |
| cndPneumo_30          | -80.320 | 7.195     | 43  | -11.164 | 0.000   |
| cndPneumo_40          | -72.696 | 7.196     | 43  | -10.102 | 0.000   |
| r10:cndObstruction_20 | -1.501  | 0.389     | 361 | -3.858  | 0.000   |
| r10:cndObstruction_30 | -2.372  | 0.550     | 361 | -4.317  | 0.000   |
| r10:cndPneumo_20      | -1.228  | 0.375     | 361 | -3.271  | 0.001   |
| r10:cndPneumo_30      | -0.456  | 0.376     | 361 | -1.211  | 0.227   |
| r10:cndPneumo_40      | -0.618  | 0.378     | 361 | -1.634  | 0.103   |

Simply focusing on a few main questions, contrasts are evaluated:

This leads to the conclusions that the downward evolution is stronger in the pneumo 20 condition compared to the pneumo 30 condition as well as compared to the control condition. Also the obstruction 20 condition shows a stronger downward evolution compared to the control condition. At the rank 10 point, its the same set of differences that is present.

The predictions can be visualized as follows:

Table 32: contrasts: glomTP

|               | Estimate | lwr     | upr    | sigma | tstat  | pvalues |
|---------------|----------|---------|--------|-------|--------|---------|
| rank          | -0.700   | -1.712  | 0.312  | 0.365 | -1.920 | 0.388   |
| ctrl-obs 20   | 47.903   | 27.619  | 68.188 | 7.312 | 6.551  | 0.000   |
| ctrl-pnm 20   | 56.496   | 36.583  | 76.409 | 7.178 | 7.870  | 0.000   |
| obs 20-30     | 12.663   | -7.853  | 33.180 | 7.396 | 1.712  | 0.542   |
| pnm 20-30     | 23.824   | 7.875   | 39.774 | 5.750 | 4.144  | 0.000   |
| pnm 30-40     | -7.624   | -23.636 | 8.387  | 5.772 | -1.321 | 0.825   |
| x ctrl-obs 20 | 1.501    | 0.422   | 2.580  | 0.389 | 3.858  | 0.001   |
| x ctrl-pnm 20 | 1.228    | 0.186   | 2.269  | 0.375 | 3.271  | 0.010   |
| x obs 20-30   | 0.871    | -0.329  | 2.072  | 0.433 | 2.014  | 0.326   |
| x pnm 20-30   | -0.772   | -1.127  | -0.416 | 0.128 | -6.020 | 0.000   |
| x pnm 30-40   | 0.163    | -0.217  | 0.542  | 0.137 | 1.187  | 0.895   |

Table 33: variance - covariance: glomTG

|             | Variance  | StdDev    |
|-------------|-----------|-----------|
| (Intercept) | 173.88933 | 13.186710 |
| Residual    | 65.37265  | 8.085336  |

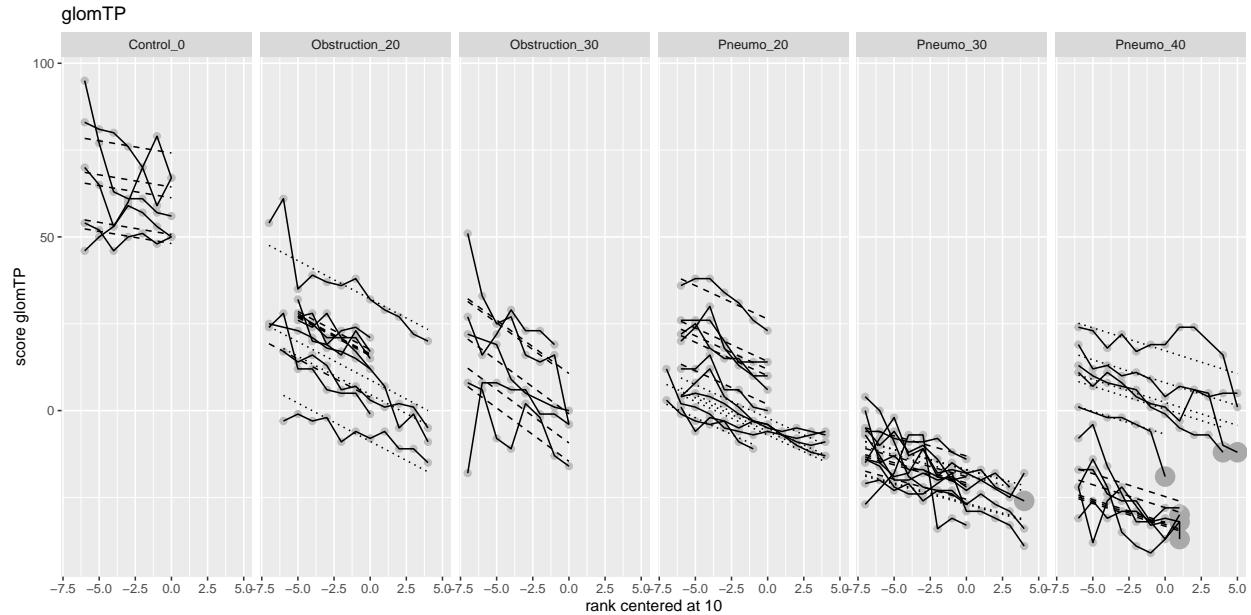

Most evolutions are well described by the average predicted evolution, but there are some notable high and low values.

A few check are made to verify the quality of the model. No severe distortions are observed.

## glomTG

Different models are compared.

The final model allows for a pig specific intercept and variance, but does not include a pig specific evolution, following the AIC criterion.

The random intercept variance and residual variance are shown (the pig specific variances are not):

Looking at the random intercept variance and the residual variance, there seems to be a strong intra-class correlation, illustrating that different pigs score different in average, conditional what else is in the model.

The typical output for the mean structure is included:

Simply focusing on a few main questions, contrasts are evaluated:

This leads to the conclusions that the downward evolution is stronger in the pneumo 20 condition compared to the pneumo 30 condition and the other way round for the obstruction. At rank 10 the control condition perform higher than the 20 conditions, and the pneumo 20 and 30 differ as well.

The predictions can be visualized as follows:

Table 34: estimates: glomTG

|                       | Value   | Std.Error | DF  | t-value | p-value |
|-----------------------|---------|-----------|-----|---------|---------|
| (Intercept)           | 54.821  | 6.257     | 360 | 8.762   | 0.000   |
| r10                   | -0.595  | 0.527     | 360 | -1.129  | 0.260   |
| cndObstruction_20     | -45.700 | 7.671     | 43  | -5.957  | 0.000   |
| cndObstruction_30     | -57.362 | 8.883     | 43  | -6.458  | 0.000   |
| cndPneumo_20          | -48.531 | 7.528     | 43  | -6.447  | 0.000   |
| cndPneumo_30          | -69.968 | 7.549     | 43  | -9.268  | 0.000   |
| cndPneumo_40          | -63.622 | 7.542     | 43  | -8.435  | 0.000   |
| r10:cndObstruction_20 | -0.952  | 0.538     | 360 | -1.768  | 0.078   |
| r10:cndObstruction_30 | -1.912  | 0.725     | 360 | -2.637  | 0.009   |
| r10:cndPneumo_20      | -1.159  | 0.530     | 360 | -2.186  | 0.029   |
| r10:cndPneumo_30      | -0.739  | 0.538     | 360 | -1.373  | 0.171   |
| r10:cndPneumo_40      | -0.960  | 0.541     | 360 | -1.774  | 0.077   |

Table 35: contrasts: glomTG

|               | Estimate | lwr     | upr    | sigma | tstat  | pvalues |
|---------------|----------|---------|--------|-------|--------|---------|
| rank          | -0.595   | -2.050  | 0.859  | 0.527 | -1.129 | 0.912   |
| ctrl-obs 20   | 45.700   | 24.528  | 66.873 | 7.671 | 5.957  | 0.000   |
| ctrl-pnm 20   | 48.531   | 27.753  | 69.308 | 7.528 | 6.447  | 0.000   |
| obs 20-30     | 11.661   | -9.621  | 32.944 | 7.711 | 1.512  | 0.682   |
| pnm 20-30     | 21.438   | 5.023   | 37.852 | 5.947 | 3.605  | 0.003   |
| pnm 30-40     | -6.346   | -22.810 | 10.118 | 5.965 | -1.064 | 0.936   |
| x ctrl-obs 20 | 0.952    | -0.534  | 2.438  | 0.538 | 1.768  | 0.486   |
| x ctrl-pnm 20 | 1.159    | -0.305  | 2.623  | 0.530 | 2.186  | 0.221   |
| x obs 20-30   | 0.960    | -0.448  | 2.368  | 0.510 | 1.882  | 0.403   |
| x pnm 20-30   | -0.420   | -0.763  | -0.077 | 0.124 | -3.380 | 0.007   |
| x pnm 30-40   | 0.221    | -0.232  | 0.674  | 0.164 | 1.347  | 0.798   |

Table 36: variance - covariance: urea

|             | Variance | StdDev   |
|-------------|----------|----------|
| (Intercept) | 39.47476 | 6.282894 |
| Residual    | 32.01873 | 5.658510 |

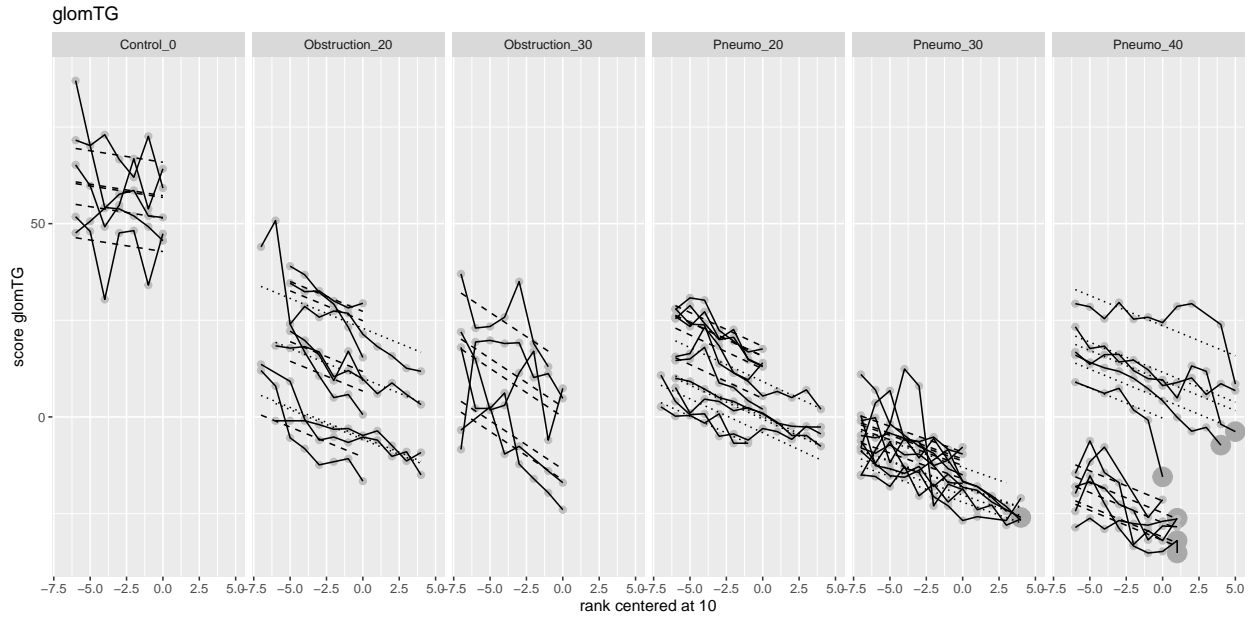

Most evolutions are well described by the average predicted evolution, but there are some notable high and low values.

A few check are made to verify the quality of the model. No severe distortions are observed.

The duration conditions, 3 and 5, appear to differ.

## urea

Different models are compared.

The final model allows for a pig specific intercept and variances, following the AIC criterion. Note that for this variable the BIC favors the most simple model, suggesting that the model although most informative is possibly too complex.

The random intercept variance and residual variance are shown:

Looking at the random intercept variance and the residual variance, there seems to be moderate intra-class correlation, illustrating that different pigs score different in average, conditional what else is in the model.

The typical output for the mean structure is included:

Simply focusing on a few main questions, contrasts are evaluated:

There is only some evidence to suggest that the evolution is a bit less strong upward for the pneumo 20 condition compared to the pneumo 30 condition, and much more compared to the control (even downward). No differences show at the rank 10 point.

Table 37: estimates urea

|                       | Value  | Std.Error | DF  | t-value | p-value |
|-----------------------|--------|-----------|-----|---------|---------|
| (Intercept)           | 19.846 | 3.068     | 366 | 6.469   | 0.000   |
| r10                   | -0.337 | 0.327     | 366 | -1.031  | 0.303   |
| cndObstruction_20     | 3.737  | 3.733     | 43  | 1.001   | 0.322   |
| cndObstruction_30     | 5.884  | 4.295     | 43  | 1.370   | 0.178   |
| cndPneumo_20          | 8.529  | 3.682     | 43  | 2.316   | 0.025   |
| cndPneumo_30          | 7.130  | 3.673     | 43  | 1.941   | 0.059   |
| cndPneumo_40          | 6.150  | 3.673     | 43  | 1.675   | 0.101   |
| r10:cndObstruction_20 | 0.578  | 0.342     | 366 | 1.693   | 0.091   |
| r10:cndObstruction_30 | 0.334  | 0.408     | 366 | 0.818   | 0.414   |
| r10:cndPneumo_20      | 1.380  | 0.347     | 366 | 3.973   | 0.000   |
| r10:cndPneumo_30      | 0.862  | 0.338     | 366 | 2.552   | 0.011   |
| r10:cndPneumo_40      | 0.577  | 0.341     | 366 | 1.691   | 0.092   |

Table 38: contrasts: urea

|               | Estimate | lwr     | upr    | sigma | tstat  | pvalues |
|---------------|----------|---------|--------|-------|--------|---------|
| rank          | -0.337   | -1.245  | 0.571  | 0.327 | -1.031 | 0.951   |
| ctrl-obs 20   | -3.737   | -14.098 | 6.624  | 3.733 | -1.001 | 0.959   |
| ctrl-pnm 20   | -8.529   | -18.749 | 1.690  | 3.682 | -2.316 | 0.170   |
| obs 20-30     | -2.147   | -12.366 | 8.072  | 3.682 | -0.583 | 0.999   |
| pnm 20-30     | 1.400    | -6.559  | 9.358  | 2.868 | 0.488  | 1.000   |
| pnm 30-40     | 0.979    | -6.945  | 8.904  | 2.855 | 0.343  | 1.000   |
| x ctrl-obs 20 | -0.578   | -1.526  | 0.370  | 0.342 | -1.693 | 0.556   |
| x ctrl-pnm 20 | -1.380   | -2.345  | -0.416 | 0.347 | -3.973 | 0.001   |
| x obs 20-30   | 0.244    | -0.488  | 0.976  | 0.264 | 0.926  | 0.974   |
| x pnm 20-30   | 0.518    | 0.118   | 0.919  | 0.144 | 3.593  | 0.003   |
| x pnm 30-40   | 0.285    | -0.072  | 0.642  | 0.129 | 2.216  | 0.213   |

Table 39: variance - covariance: crea

|             | Variance   | StdDev    |
|-------------|------------|-----------|
| (Intercept) | 0.27094940 | 0.5205280 |
| Residual    | 0.07578357 | 0.2752882 |

The predictions can be visualized as follows:

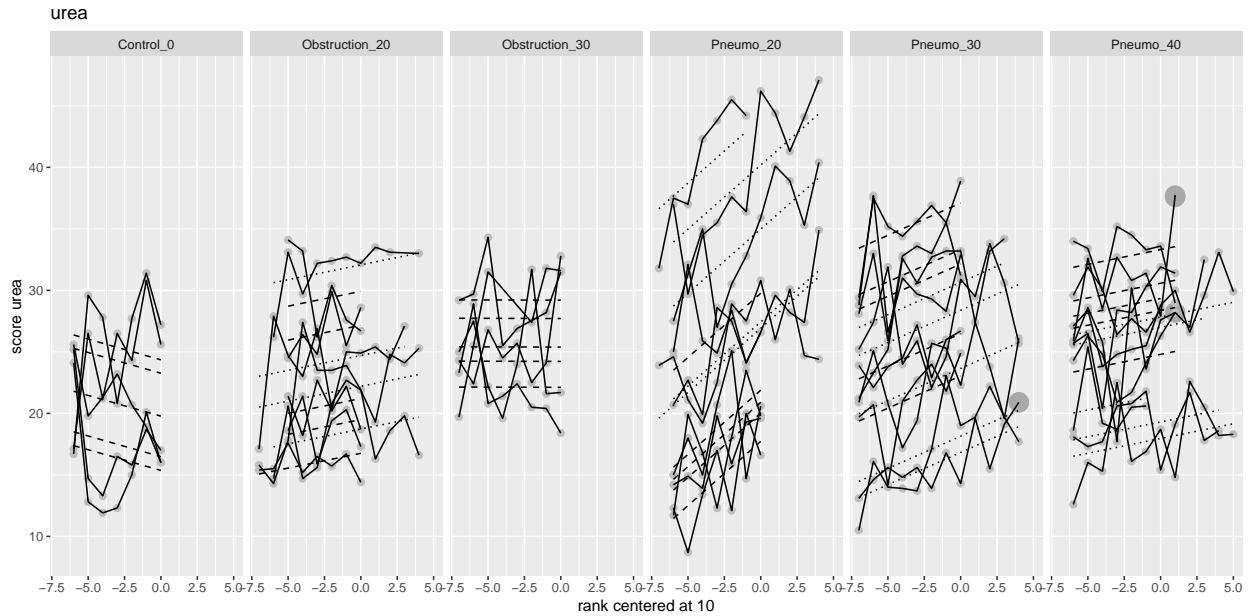

A few check are made to verify the quality of the model. There appear to be no severe issues.

## crea

Different models are compared.

The final model allows for a pig specific intercept and variance, but does not include a pig specific evolution, following the AIC criterion.

The random intercept variance and residual variance are shown (the pig specific variances are not):

Looking at the random intercept variance and the residual variance, there seems to be a strong intra-class correlation, illustrating that different pigs score a bit different in average, conditional what else is in the model.

The typical output for the mean structure is included:

Simply focusing on a few main questions, contrasts are evaluated:

The pneumo 20 condition evolves more strongly upward compared to the control, and also compared to the pneumo 30. At rank 10 there seems to be only evidence for a difference for the pneumo 40 condition, compared to the 30.

The predictions can be visualized as follows:

Table 40: estimates: crea

|                       | Value | Std.Error | DF  | t-value | p-value |
|-----------------------|-------|-----------|-----|---------|---------|
| (Intercept)           | 2.375 | 0.250     | 365 | 9.507   | 0.000   |
| r10                   | 0.013 | 0.025     | 365 | 0.540   | 0.590   |
| cndObstruction_20     | 0.169 | 0.306     | 43  | 0.554   | 0.582   |
| cndObstruction_30     | 0.105 | 0.349     | 43  | 0.300   | 0.766   |
| cndPneumo_20          | 0.646 | 0.301     | 43  | 2.145   | 0.038   |
| cndPneumo_30          | 0.922 | 0.300     | 43  | 3.076   | 0.004   |
| cndPneumo_40          | 0.088 | 0.300     | 43  | 0.294   | 0.770   |
| r10:cndObstruction_20 | 0.040 | 0.025     | 365 | 1.590   | 0.113   |
| r10:cndObstruction_30 | 0.024 | 0.030     | 365 | 0.805   | 0.421   |
| r10:cndPneumo_20      | 0.128 | 0.025     | 365 | 5.049   | 0.000   |
| r10:cndPneumo_30      | 0.090 | 0.025     | 365 | 3.598   | 0.000   |
| r10:cndPneumo_40      | 0.042 | 0.025     | 365 | 1.693   | 0.091   |

Table 41: contrasts: crea

|               | Estimate | lwr    | upr    | sigma | tstat  | pvalues |
|---------------|----------|--------|--------|-------|--------|---------|
| rank          | 0.013    | -0.055 | 0.082  | 0.025 | 0.540  | 0.999   |
| ctrl-obs 20   | -0.169   | -1.017 | 0.678  | 0.306 | -0.554 | 0.999   |
| ctrl-pnm 20   | -0.646   | -1.480 | 0.188  | 0.301 | -2.145 | 0.246   |
| obs 20-30     | 0.065    | -0.767 | 0.897  | 0.300 | 0.216  | 1.000   |
| pnm 20-30     | -0.276   | -0.929 | 0.377  | 0.236 | -1.170 | 0.900   |
| pnm 30-40     | 0.834    | 0.184  | 1.483  | 0.235 | 3.552  | 0.004   |
| x ctrl-obs 20 | -0.040   | -0.110 | 0.030  | 0.025 | -1.590 | 0.632   |
| x ctrl-pnm 20 | -0.128   | -0.199 | -0.058 | 0.025 | -5.049 | 0.000   |
| x obs 20-30   | 0.016    | -0.031 | 0.063  | 0.017 | 0.944  | 0.970   |
| x pnm 20-30   | 0.039    | 0.020  | 0.057  | 0.007 | 5.720  | 0.000   |
| x pnm 30-40   | 0.047    | 0.034  | 0.061  | 0.005 | 9.868  | 0.000   |

Table 42: variance - covariance: beEcf

|             | Variance  | StdDev    | Corr   |
|-------------|-----------|-----------|--------|
| (Intercept) | 8.5205869 | 2.9190044 | (Intr) |
| rank        | 0.1578882 | 0.3973514 | -0.488 |
| Residual    | 2.3762437 | 1.5415070 |        |

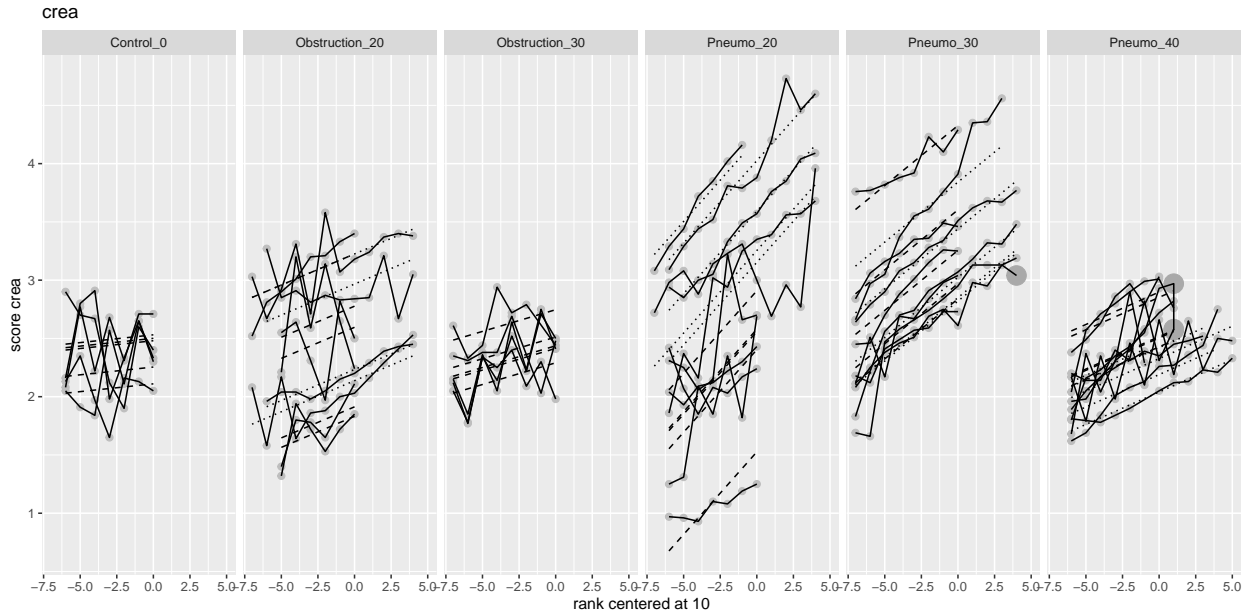

Most evolutions are well described by the average predicted evolution, but there are some notable extremely high and low values.

A few check are made to verify the quality of the model. No severe distortions are observed.

## Metab: highest priority

For the highest priority cardio observations, the following variables are considered consecutively: .

### beEcf

Different models are compared.

The final model allows for a pig specific intercept and slope, but does not include a pig specific variance, following the AIC criterion.

The random intercept and slope variance and residual variance are shown:

Looking at the random intercept variance and the residual variance, there seems to be a strong intra-class correlation, illustrating that different pigs score different in average, conditional what else is in the model. The slope variance is minor.

The typical output for the mean structure is included:



Table 43: estimates: beEcf

|                       | Value   | Std.Error | DF  | t-value | p-value |
|-----------------------|---------|-----------|-----|---------|---------|
| (Intercept)           | 4.607   | 1.679     | 360 | 2.744   | 0.006   |
| r10                   | 0.136   | 0.220     | 360 | 0.616   | 0.538   |
| cndObstruction_20     | -8.489  | 2.082     | 43  | -4.077  | 0.000   |
| cndObstruction_30     | -9.257  | 2.438     | 43  | -3.798  | 0.000   |
| cndPneumo_20          | -0.066  | 2.047     | 43  | -0.032  | 0.975   |
| cndPneumo_30          | -5.652  | 2.046     | 43  | -2.762  | 0.008   |
| cndPneumo_40          | -13.202 | 2.046     | 43  | -6.454  | 0.000   |
| r10:cndObstruction_20 | -0.901  | 0.270     | 360 | -3.342  | 0.001   |
| r10:cndObstruction_30 | -0.668  | 0.316     | 360 | -2.111  | 0.035   |
| r10:cndPneumo_20      | -0.286  | 0.264     | 360 | -1.084  | 0.279   |
| r10:cndPneumo_30      | -1.217  | 0.262     | 360 | -4.656  | 0.000   |
| r10:cndPneumo_40      | -1.557  | 0.264     | 360 | -5.901  | 0.000   |

Table 44: contrasts: beEcf

|               | Estimate | lwr    | upr    | sigma | tstat  | pvalues |
|---------------|----------|--------|--------|-------|--------|---------|
| rank          | 0.136    | -0.473 | 0.744  | 0.220 | 0.616  | 0.997   |
| ctrl-obs 20   | 8.489    | 2.740  | 14.238 | 2.082 | 4.077  | 0.000   |
| ctrl-pnm 20   | 0.066    | -5.587 | 5.718  | 2.047 | 0.032  | 1.000   |
| obs 20-30     | 0.768    | -5.180 | 6.716  | 2.154 | 0.357  | 1.000   |
| pnm 20-30     | 5.587    | 1.015  | 10.158 | 1.656 | 3.374  | 0.007   |
| pnm 30-40     | 7.550    | 2.984  | 12.115 | 1.654 | 4.566  | 0.000   |
| x ctrl-obs 20 | 0.901    | 0.157  | 1.646  | 0.270 | 3.342  | 0.008   |
| x ctrl-pnm 20 | 0.286    | -0.443 | 1.015  | 0.264 | 1.084  | 0.907   |
| x obs 20-30   | -0.233   | -0.993 | 0.526  | 0.275 | -0.848 | 0.976   |
| x pnm 20-30   | 0.931    | 0.372  | 1.490  | 0.202 | 4.600  | 0.000   |
| x pnm 30-40   | 0.339    | -0.219 | 0.897  | 0.202 | 1.678  | 0.522   |

Simply focusing on a few main questions, contrasts are evaluated:

The pneumo 20 condition appears to evolve different from the pneumo 30 condition, while the control appears to evolve different from the observation 20 condition. At rank 10, there is a difference suggested for the different pneumo conditions, 40 versus 30 versus 20. The control and obstruction 20 also differ.

The predictions can be visualized as follows:

Table 45: variance - covariance: hco3

|             | Variance  | StdDev    | Corr   |
|-------------|-----------|-----------|--------|
| (Intercept) | 7.9071921 | 2.8119730 | (Intr) |
| rank        | 0.1481469 | 0.3848986 | -0.427 |
| Residual    | 2.2117993 | 1.4872119 |        |

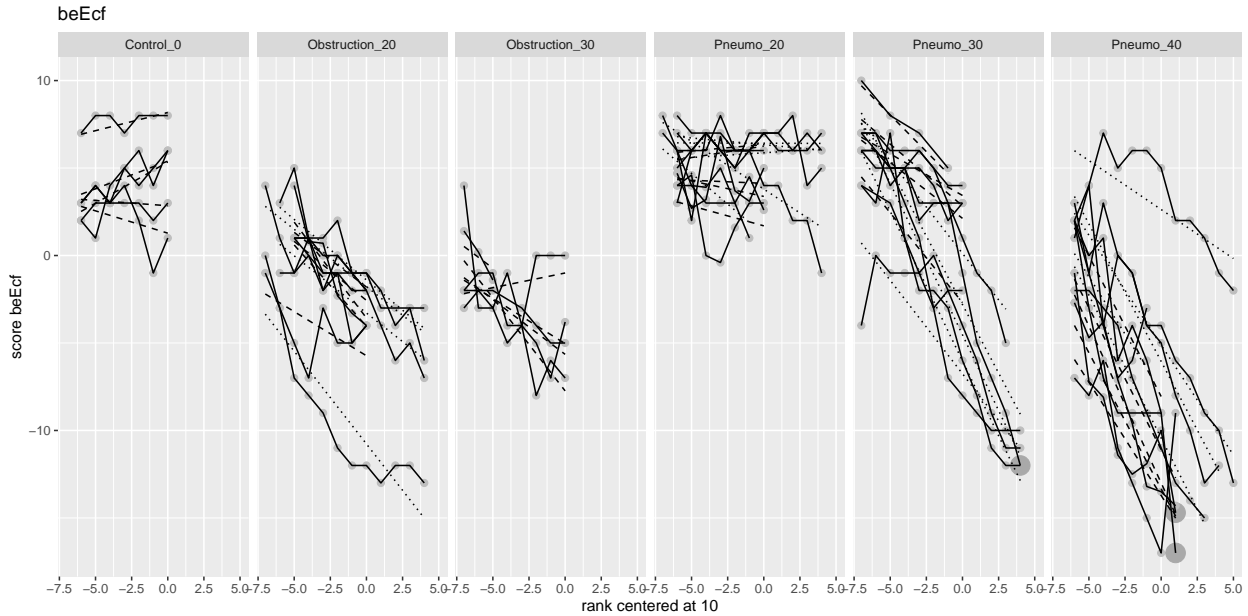

Some evolutions are well described by the average predicted evolution, but clearly there are various observations that do not in any way reflect the estimated model.

A few check are made to verify the quality of the model. No severe distortions are observed.

### hco3

Different models are compared.

The final model allows for a pig specific intercept and slope following the AIC criterion.

The random intercept and slope variance and residual variance are shown:

Looking at the random intercept variance and the residual variance, there seems to be a strong intra-class correlation, illustrating that different pigs score different in average, conditional what else is in the model.

The typical output for the mean structure is included:

Simply focusing on a few main questions, contrasts are evaluated:

The pneumo 20 condition appears to evolve different from the pneumo 30 condition, while the control appears to evolve different from the observation 20 condition. Compared to the `beEcf` variable with which this variable correlates extremely (0.9734304) there is a notable effect, the evolution between the pneumo 30 and 40 now also appear to be different.

Table 46: estimates hco3

|                       | Value   | Std.Error | DF  | t-value | p-value |
|-----------------------|---------|-----------|-----|---------|---------|
| (Intercept)           | 28.916  | 1.704     | 361 | 16.972  | 0.000   |
| r10                   | -0.034  | 0.213     | 361 | -0.158  | 0.875   |
| cndObstruction_20     | -6.424  | 2.114     | 43  | -3.038  | 0.004   |
| cndObstruction_30     | -7.187  | 2.468     | 43  | -2.912  | 0.006   |
| cndPneumo_20          | 0.977   | 2.078     | 43  | 0.470   | 0.641   |
| cndPneumo_30          | -3.817  | 2.078     | 43  | -1.837  | 0.073   |
| cndPneumo_40          | -11.801 | 2.077     | 43  | -5.682  | 0.000   |
| r10:cndObstruction_20 | -0.602  | 0.261     | 361 | -2.306  | 0.022   |
| r10:cndObstruction_30 | -0.297  | 0.306     | 361 | -0.971  | 0.332   |
| r10:cndPneumo_20      | -0.037  | 0.255     | 361 | -0.145  | 0.885   |
| r10:cndPneumo_30      | -0.821  | 0.253     | 361 | -3.243  | 0.001   |
| r10:cndPneumo_40      | -1.297  | 0.255     | 361 | -5.084  | 0.000   |

Table 47: contrasts: hco3

|               | Estimate | lwr    | upr    | sigma | tstat  | pvalues |
|---------------|----------|--------|--------|-------|--------|---------|
| rank          | -0.034   | -0.622 | 0.554  | 0.213 | -0.158 | 1.000   |
| ctrl-obs 20   | 6.424    | 0.592  | 12.256 | 2.114 | 3.038  | 0.022   |
| ctrl-pnm 20   | -0.977   | -6.711 | 4.757  | 2.078 | -0.470 | 1.000   |
| obs 20-30     | 0.764    | -5.253 | 6.780  | 2.181 | 0.350  | 1.000   |
| pnm 20-30     | 4.794    | 0.152  | 9.435  | 1.682 | 2.849  | 0.039   |
| pnm 30-40     | 7.985    | 3.349  | 12.621 | 1.681 | 4.751  | 0.000   |
| x ctrl-obs 20 | 0.602    | -0.118 | 1.321  | 0.261 | 2.306  | 0.160   |
| x ctrl-pnm 20 | 0.037    | -0.668 | 0.741  | 0.255 | 0.145  | 1.000   |
| x obs 20-30   | -0.304   | -1.039 | 0.430  | 0.266 | -1.143 | 0.879   |
| x pnm 20-30   | 0.784    | 0.243  | 1.324  | 0.196 | 4.000  | 0.001   |
| x pnm 30-40   | 0.477    | -0.063 | 1.016  | 0.196 | 2.437  | 0.118   |

Table 48: variance - covariance: mpp

|             | Variance    | StdDev     | Corr   |
|-------------|-------------|------------|--------|
| (Intercept) | 0.750918852 | 0.86655574 | (Intr) |
| rank        | 0.005160585 | 0.07183721 | -0.549 |
| Residual    | 0.174976745 | 0.41830222 |        |

The predictions can be visualized as follows:

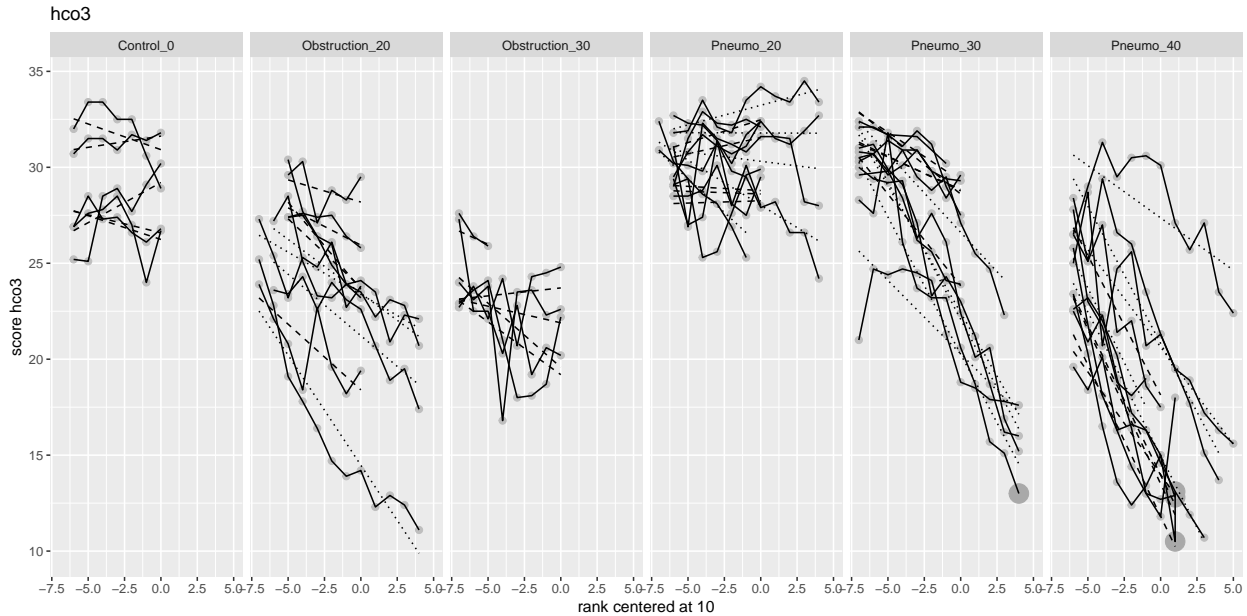

A few check are made to verify the quality of the model. No severe distortions are observed.

## Resp: highest priority

For the highest priority resp observations, the following variables are considered consecutively: .

### mpp

Different models are compared.

The final model allows for a pig specific intercept and slope, following the AIC criterion. The model with the pig specific variance did not get estimated.

The random intercept and slope variance and residual variance are shown:

Looking at the random intercept variance and the residual variance, there seems to be a strong intra-class correlation, illustrating that different pigs score different in average, conditional what else is in the model. The slope was minor.

The typical output for the mean structure is included:

Simply focusing on a few main questions, contrasts are evaluated:

Table 49: estimates: mpp

|                       | Value  | Std.Error | DF  | t-value | p-value |
|-----------------------|--------|-----------|-----|---------|---------|
| (Intercept)           | 5.486  | 0.365     | 368 | 15.043  | 0.000   |
| r10                   | 0.114  | 0.048     | 368 | 2.392   | 0.017   |
| cndObstruction_20     | 0.325  | 0.450     | 43  | 0.721   | 0.475   |
| cndObstruction_30     | 0.848  | 0.514     | 43  | 1.649   | 0.106   |
| cndPneumo_20          | 1.094  | 0.443     | 43  | 2.468   | 0.018   |
| cndPneumo_30          | 1.729  | 0.442     | 43  | 3.910   | 0.000   |
| cndPneumo_40          | 3.361  | 0.443     | 43  | 7.586   | 0.000   |
| r10:cndObstruction_20 | -0.084 | 0.057     | 368 | -1.454  | 0.147   |
| r10:cndObstruction_30 | -0.012 | 0.064     | 368 | -0.185  | 0.853   |
| r10:cndPneumo_20      | -0.057 | 0.056     | 368 | -1.018  | 0.310   |
| r10:cndPneumo_30      | -0.052 | 0.055     | 368 | -0.944  | 0.346   |
| r10:cndPneumo_40      | 0.039  | 0.056     | 368 | 0.697   | 0.486   |

Table 50: contrasts: mpp

|               | Estimate | lwr    | upr    | sigma | tstat  | pvalues |
|---------------|----------|--------|--------|-------|--------|---------|
| rank          | 0.114    | -0.019 | 0.247  | 0.048 | 2.392  | 0.144   |
| ctrl-obs 20   | -0.325   | -1.580 | 0.931  | 0.450 | -0.721 | 0.995   |
| ctrl-pnm 20   | -1.094   | -2.329 | 0.142  | 0.443 | -2.468 | 0.119   |
| obs 20-30     | -0.523   | -1.773 | 0.727  | 0.449 | -1.166 | 0.902   |
| pnm 20-30     | -0.635   | -1.624 | 0.354  | 0.355 | -1.790 | 0.482   |
| pnm 30-40     | -1.632   | -2.621 | -0.644 | 0.355 | -4.602 | 0.000   |
| x ctrl-obs 20 | 0.084    | -0.077 | 0.244  | 0.057 | 1.454  | 0.734   |
| x ctrl-pnm 20 | 0.057    | -0.100 | 0.214  | 0.056 | 1.018  | 0.953   |
| x obs 20-30   | -0.072   | -0.221 | 0.078  | 0.054 | -1.334 | 0.813   |
| x pnm 20-30   | -0.005   | -0.118 | 0.108  | 0.041 | -0.126 | 1.000   |
| x pnm 30-40   | -0.092   | -0.205 | 0.022  | 0.041 | -2.238 | 0.206   |

Table 51: variance - covariance: compl

|             | Variance | StdDev   |
|-------------|----------|----------|
| (Intercept) | 2.685425 | 1.638727 |
| Residual    | 2.150338 | 1.466403 |

For this variable, there are almost no differences notable, only the pneumo 30 and 40 seem to differ.

The predictions can be visualized as follows:

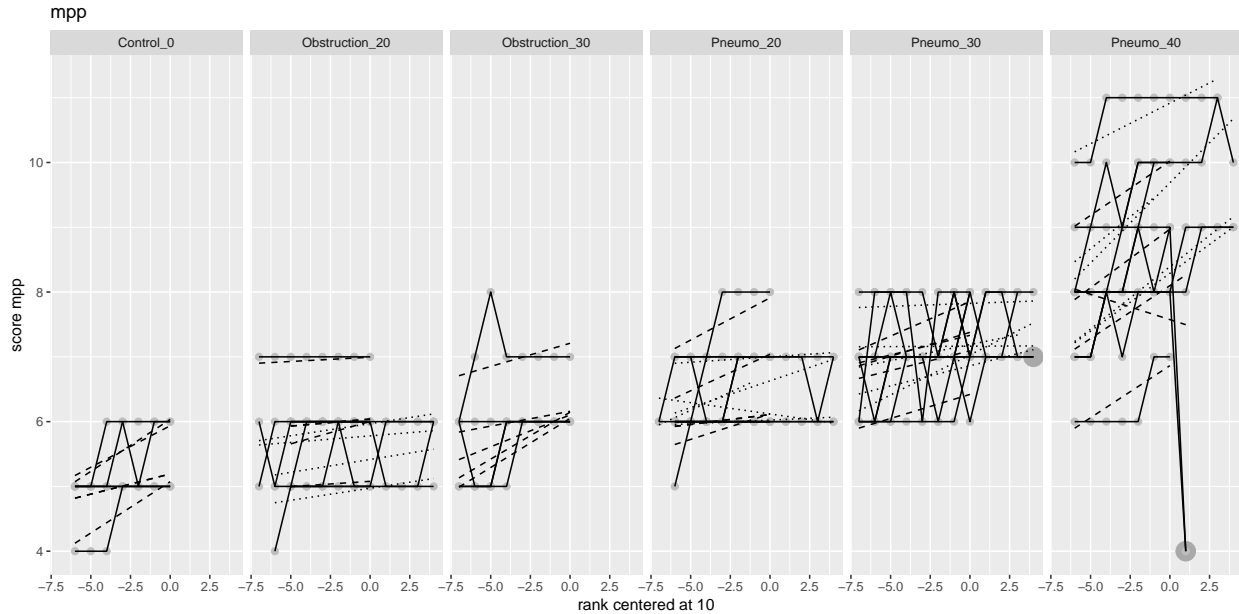

The data is treated as if they would be on a continuous scale while in fact they are ordinal. While this is not necessarily a problem, with 8 distinct response categories, it is no surprise that the fitted evolution is not fully in agreement with the observations.

A few checks are made to verify the quality of the model. No severe distortions are observed, but the categorical nature of the data does show.

Because maybe the observations could be considered counts, and a poisson distribution would fit the residuals better, also a generalized linear mixed model with a poisson distribution was considered. It is not fully described but the effects found with the linear mixed model completely disappeared.

Note that for this variable it appears that there is an inverse relation with weight.

## compl

Different models are compared.

The final model allows for a pig specific intercept and variance, but does not include a pig specific evolution, following the AIC criterion.

The random intercept variance and residual variance are shown (the pig specific variances are not):

Looking at the random intercept variance and the residual variance, there seems to be a moderate intra-class correlation, illustrating that different pigs score different in average, conditional what else is in the model.

Table 52: estimates compl

|                       | Value   | Std.Error | DF  | t-value | p-value |
|-----------------------|---------|-----------|-----|---------|---------|
| (Intercept)           | 17.774  | 0.767     | 366 | 23.164  | 0.000   |
| r10                   | 0.029   | 0.057     | 366 | 0.511   | 0.610   |
| cndObstruction_20     | -9.800  | 0.944     | 43  | -10.386 | 0.000   |
| cndObstruction_30     | -10.168 | 1.069     | 43  | -9.516  | 0.000   |
| cndPneumo_20          | -9.628  | 0.927     | 43  | -10.388 | 0.000   |
| cndPneumo_30          | -12.045 | 0.927     | 43  | -12.988 | 0.000   |
| cndPneumo_40          | -11.103 | 0.927     | 43  | -11.974 | 0.000   |
| r10:cndObstruction_20 | -0.096  | 0.059     | 366 | -1.632  | 0.103   |
| r10:cndObstruction_30 | -0.202  | 0.064     | 366 | -3.171  | 0.002   |
| r10:cndPneumo_20      | -0.103  | 0.058     | 366 | -1.783  | 0.075   |
| r10:cndPneumo_30      | -0.150  | 0.058     | 366 | -2.598  | 0.010   |
| r10:cndPneumo_40      | -0.121  | 0.058     | 366 | -2.089  | 0.037   |

Table 53: contrasts: compl

|               | Estimate | lwr    | upr    | sigma | tstat  | pvalues |
|---------------|----------|--------|--------|-------|--------|---------|
| rank          | 0.029    | -0.129 | 0.188  | 0.057 | 0.511  | 1.000   |
| ctrl-obs 20   | 9.800    | 7.193  | 12.407 | 0.944 | 10.386 | 0.000   |
| ctrl-pnm 20   | 9.628    | 7.067  | 12.188 | 0.927 | 10.388 | 0.000   |
| obs 20-30     | 0.368    | -2.186 | 2.923  | 0.924 | 0.399  | 1.000   |
| pnm 20-30     | 2.417    | 0.384  | 4.451  | 0.736 | 3.286  | 0.009   |
| pnm 30-40     | -0.942   | -2.977 | 1.093  | 0.736 | -1.279 | 0.841   |
| x ctrl-obs 20 | 0.096    | -0.066 | 0.258  | 0.059 | 1.632  | 0.594   |
| x ctrl-pnm 20 | 0.103    | -0.057 | 0.263  | 0.058 | 1.783  | 0.478   |
| x obs 20-30   | 0.106    | 0.021  | 0.190  | 0.031 | 3.458  | 0.005   |
| x pnm 20-30   | 0.047    | 0.016  | 0.078  | 0.011 | 4.213  | 0.000   |
| x pnm 30-40   | -0.030   | -0.059 | -0.001 | 0.011 | -2.831 | 0.041   |

The typical output for the mean structure is included:

Simply focusing on a few main questions, contrasts are evaluated:

The evolution over time is different for the obstruction 20 versus 30, and for the pneumo 20 versus 30, and 30 versus 40. The control conditions clearly score higher compared to the 20 conditions too, at rank 10.

The predictions can be visualized as follows:

Table 54: variance - covariance: po2Kpa

|             | Variance | StdDev   |
|-------------|----------|----------|
| (Intercept) | 95.84755 | 9.790176 |
| Residual    | 20.96882 | 4.579173 |

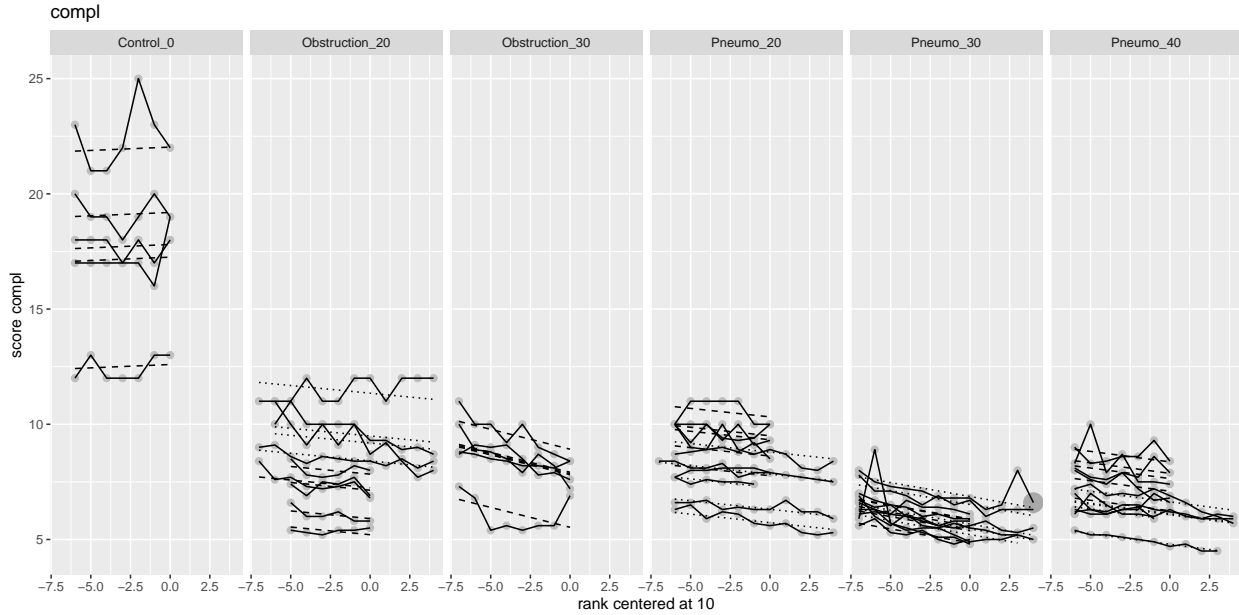

A few extreme values are observed for the pneumo 40 condition especially.

A few check are made to verify the quality of the model. No severe distortions are observed.

Note that for this variable it appears that weight matters, higher values with heavier pigs.

## po2Kpa

Different models are compared.

The final model allows for a pig specific intercept and variance, but does not include a pig specific evolution, following the AIC criterion.

The random intercept variance and residual variance are shown (the pig specific variances are not):

Looking at the random intercept variance and the residual variance, there seems to be a strong intra-class correlation, illustrating that different pigs score different in average, conditional what else is in the model.

The typical output for the mean structure is included:

Simply focusing on a few main questions, contrasts are evaluated:

There is a difference in change over time for the pneumo 30 versus 40 conditions, and for the control versus obstruction at 20. There are some differences at rank 10 as well for the pneumo 30 and 40 conditions.

The predictions can be visualized as follows:



Table 55: estimates: po2Kpa

|                       | Value  | Std.Error | DF  | t-value | p-value |
|-----------------------|--------|-----------|-----|---------|---------|
| (Intercept)           | 47.832 | 4.489     | 349 | 10.655  | 0.000   |
| r10                   | 1.047  | 0.260     | 349 | 4.022   | 0.000   |
| cndObstruction_20     | -2.845 | 5.602     | 43  | -0.508  | 0.614   |
| cndObstruction_30     | 4.834  | 6.603     | 43  | 0.732   | 0.468   |
| cndPneumo_20          | 14.418 | 5.514     | 43  | 2.615   | 0.012   |
| cndPneumo_30          | 22.525 | 5.509     | 43  | 4.089   | 0.000   |
| cndPneumo_40          | 2.937  | 5.517     | 43  | 0.532   | 0.597   |
| r10:cndObstruction_20 | -1.297 | 0.315     | 349 | -4.116  | 0.000   |
| r10:cndObstruction_30 | -1.078 | 0.458     | 349 | -2.353  | 0.019   |
| r10:cndPneumo_20      | -1.014 | 0.332     | 349 | -3.055  | 0.002   |
| r10:cndPneumo_30      | -0.375 | 0.303     | 349 | -1.239  | 0.216   |
| r10:cndPneumo_40      | -1.214 | 0.315     | 349 | -3.854  | 0.000   |

Table 56: contrasts: po2Kpa

|               | Estimate | lwr     | upr    | sigma | tstat  | pvalues |
|---------------|----------|---------|--------|-------|--------|---------|
| rank          | 1.047    | 0.319   | 1.776  | 0.260 | 4.022  | 0.001   |
| ctrl-obs 20   | 2.845    | -12.825 | 18.515 | 5.602 | 0.508  | 1.000   |
| ctrl-pnm 20   | -14.418  | -29.842 | 1.006  | 5.514 | -2.615 | 0.084   |
| obs 20-30     | -7.679   | -24.152 | 8.793  | 5.889 | -1.304 | 0.847   |
| pnm 20-30     | -8.107   | -20.754 | 4.541  | 4.522 | -1.793 | 0.497   |
| pnm 30-40     | 19.588   | 6.929   | 32.246 | 4.526 | 4.328  | 0.000   |
| x ctrl-obs 20 | 1.297    | 0.415   | 2.178  | 0.315 | 4.116  | 0.000   |
| x ctrl-pnm 20 | 1.014    | 0.086   | 1.943  | 0.332 | 3.055  | 0.023   |
| x obs 20-30   | -0.219   | -1.384  | 0.946  | 0.416 | -0.525 | 1.000   |
| x pnm 20-30   | -0.639   | -1.358  | 0.080  | 0.257 | -2.487 | 0.118   |
| x pnm 30-40   | 0.839    | 0.182   | 1.496  | 0.235 | 3.574  | 0.004   |

Table 57: variance - covariance: vti

|             | Variance  | StdDev   |
|-------------|-----------|----------|
| (Intercept) | 2386.4839 | 48.85165 |
| Residual    | 910.8179  | 30.17976 |

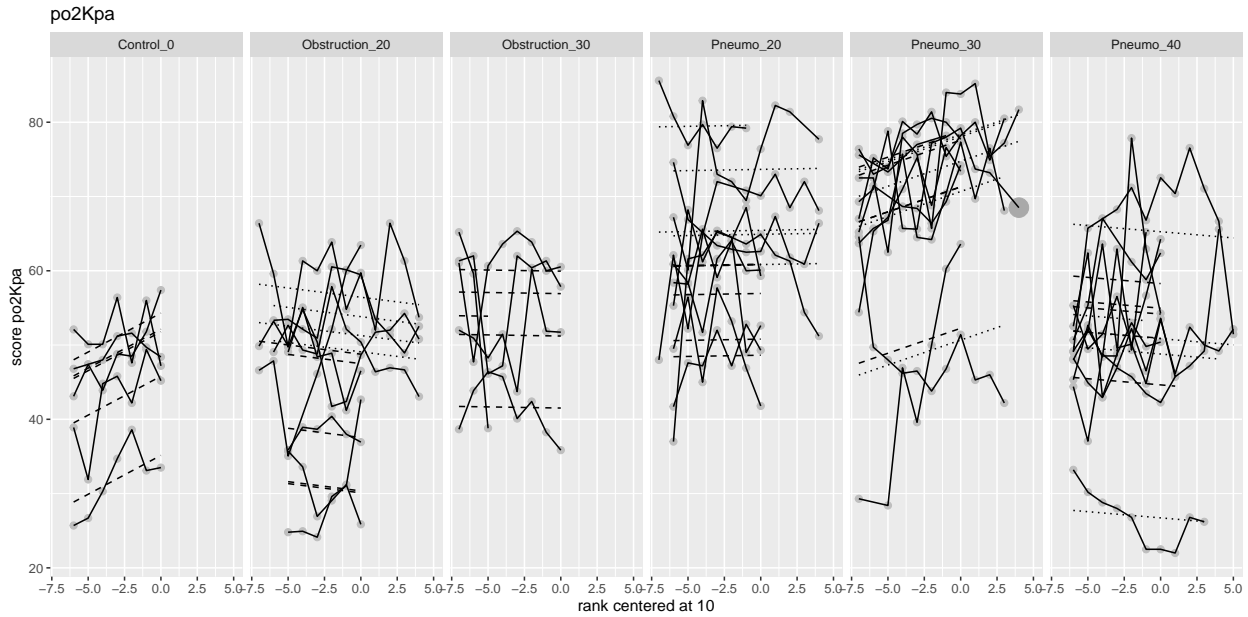

A few check are made to verify the quality of the model. No severe distortions are observed.

Note that for this variable it appears that both the weight (higher scores for heavier pigs) and the duration matter, with different evolutions for different durations.

## Resp: medium priority

For the medium priority resp observations, the following variables are considered consecutively: .

### vti

Different models are compared.

The final model allows for a pig specific intercept and variance, following the AIC criterion.

The random intercept and slope variance and residual variance are shown:

Looking at the random intercept variance and the residual variance, there seems to be a strong intra-class correlation, illustrating that different pigs score different in average, conditional what else is in the model.

The typical output for the mean structure is included:

Simply focusing on a few main questions, contrasts are evaluated:

Table 58: estimates: vti

|                       | Value    | Std.Error | DF  | t-value | p-value |
|-----------------------|----------|-----------|-----|---------|---------|
| (Intercept)           | 322.627  | 22.368    | 370 | 14.424  | 0.000   |
| r10                   | 6.915    | 1.156     | 370 | 5.983   | 0.000   |
| cndObstruction_20     | -112.546 | 27.694    | 43  | -4.064  | 0.000   |
| cndObstruction_30     | -69.799  | 31.315    | 43  | -2.229  | 0.031   |
| cndPneumo_20          | -88.547  | 27.219    | 43  | -3.253  | 0.002   |
| cndPneumo_30          | -95.011  | 27.228    | 43  | -3.489  | 0.001   |
| cndPneumo_40          | 6.766    | 27.225    | 43  | 0.249   | 0.805   |
| r10:cndObstruction_20 | -5.358   | 1.177     | 370 | -4.553  | 0.000   |
| r10:cndObstruction_30 | -5.544   | 1.199     | 370 | -4.626  | 0.000   |
| r10:cndPneumo_20      | -7.098   | 1.212     | 370 | -5.857  | 0.000   |
| r10:cndPneumo_30      | -5.786   | 1.191     | 370 | -4.859  | 0.000   |
| r10:cndPneumo_40      | -2.959   | 1.190     | 370 | -2.488  | 0.013   |

Table 59: contrasts: vti

|               | Estimate | lwr      | upr     | sigma  | tstat  | pvalues |
|---------------|----------|----------|---------|--------|--------|---------|
| rank          | 6.915    | 3.712    | 10.119  | 1.156  | 5.983  | 0.000   |
| ctrl-obs 20   | 112.546  | 35.800   | 189.292 | 27.694 | 4.064  | 0.000   |
| ctrl-pnm 20   | 88.547   | 13.117   | 163.978 | 27.219 | 3.253  | 0.011   |
| obs 20-30     | -42.747  | -118.487 | 32.993  | 27.331 | -1.564 | 0.654   |
| pnm 20-30     | 6.464    | -54.355  | 67.283  | 21.947 | 0.295  | 1.000   |
| pnm 30-40     | -101.777 | -162.614 | -40.940 | 21.953 | -4.636 | 0.000   |
| x ctrl-obs 20 | 5.358    | 2.097    | 8.620   | 1.177  | 4.553  | 0.000   |
| x ctrl-pnm 20 | 7.098    | 3.740    | 10.457  | 1.212  | 5.857  | 0.000   |
| x obs 20-30   | 0.186    | -0.885   | 1.257   | 0.386  | 0.481  | 1.000   |
| x pnm 20-30   | -1.312   | -2.596   | -0.028  | 0.463  | -2.831 | 0.042   |
| x pnm 30-40   | -2.827   | -3.940   | -1.715  | 0.401  | -7.043 | 0.000   |

Table 60: variance - covariance: mve

|             | Variance    | StdDev     | Corr   |
|-------------|-------------|------------|--------|
| (Intercept) | 0.374269890 | 0.61177601 | (Intr) |
| rank        | 0.002865749 | 0.05353269 | -0.242 |
| Residual    | 0.021290334 | 0.14591208 |        |

For this variable, there are different evolutions observed between the pneumo 40 and 30, 30 and 20, 20 and control. Also for the obstruction the evolution runs different for the control and 20. At rank 10, there are again some differences notable, the pneumo 40 scores much higher than 30, and the pneumo 20 much higher than the control. The latter is also true for the obstruction.

The predictions can be visualized as follows:

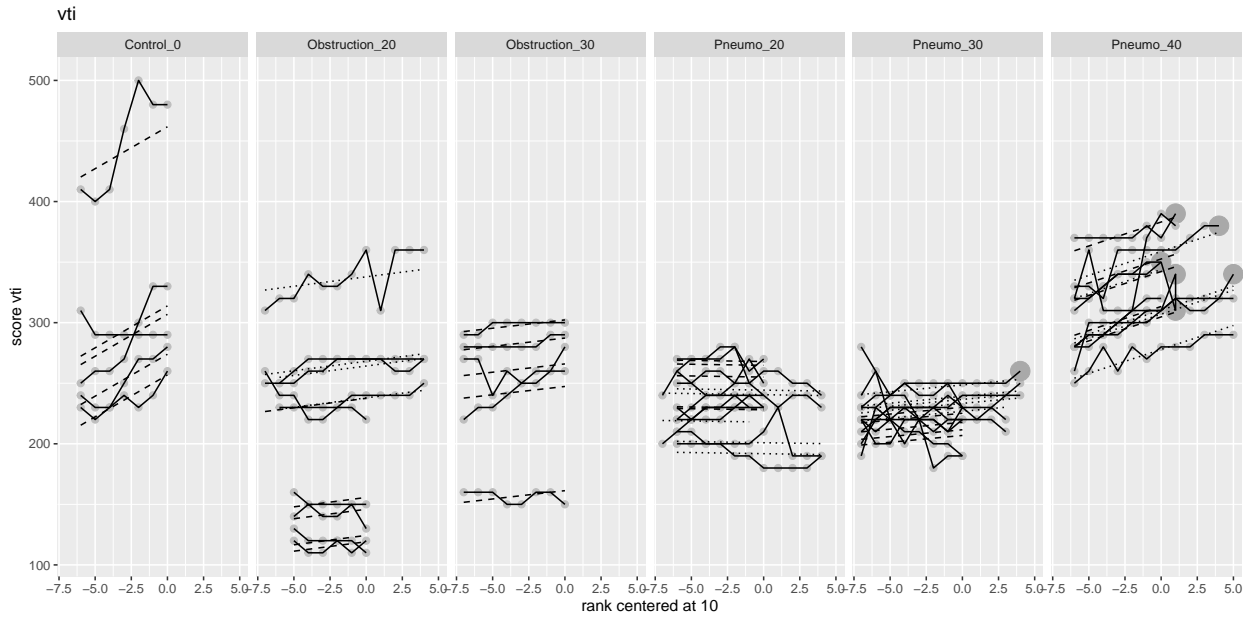

A few checks are made to verify the quality of the model. No severe distortions are observed, but the categorical nature of the data does show.

Note that for this variable it appears that the observations differ depending on weight, both are positively related.

## mve

Different models are compared.

The final model allows for a pig specific intercept and slope, following the AIC criterion. The model with pig specific variances did not estimate. The random intercept and slope variance, and residual variance are shown:

Looking at the random intercept variance and the residual variance, there seems to be a severe intra-class correlation, illustrating that different pigs score different in average, conditional what else is in the model. The slope variance is quite limited.

The typical output for the mean structure is included:

Table 61: estimates mve

|                       | Value  | Std.Error | DF  | t-value | p-value |
|-----------------------|--------|-----------|-----|---------|---------|
| (Intercept)           | 4.599  | 0.320     | 370 | 14.363  | 0.000   |
| r10                   | 0.128  | 0.027     | 370 | 4.763   | 0.000   |
| cndObstruction_20     | -2.192 | 0.399     | 43  | -5.497  | 0.000   |
| cndObstruction_30     | -1.410 | 0.453     | 43  | -3.117  | 0.003   |
| cndPneumo_20          | -1.592 | 0.392     | 43  | -4.063  | 0.000   |
| cndPneumo_30          | -1.915 | 0.392     | 43  | -4.892  | 0.000   |
| cndPneumo_40          | -0.508 | 0.392     | 43  | -1.296  | 0.202   |
| r10:cndObstruction_20 | -0.117 | 0.033     | 370 | -3.524  | 0.000   |
| r10:cndObstruction_30 | -0.105 | 0.037     | 370 | -2.794  | 0.005   |
| r10:cndPneumo_20      | -0.128 | 0.033     | 370 | -3.926  | 0.000   |
| r10:cndPneumo_30      | -0.133 | 0.032     | 370 | -4.122  | 0.000   |
| r10:cndPneumo_40      | -0.056 | 0.033     | 370 | -1.720  | 0.086   |

Table 62: contrasts: mve

|               | Estimate | lwr    | upr    | sigma | tstat  | pvalues |
|---------------|----------|--------|--------|-------|--------|---------|
| rank          | 0.128    | 0.053  | 0.203  | 0.027 | 4.763  | 0.000   |
| ctrl-obs 20   | 2.192    | 1.082  | 3.302  | 0.399 | 5.497  | 0.000   |
| ctrl-pnm 20   | 1.592    | 0.502  | 2.682  | 0.392 | 4.063  | 0.001   |
| obs 20-30     | -0.782   | -1.890 | 0.327  | 0.398 | -1.961 | 0.349   |
| pnm 20-30     | 0.324    | -0.564 | 1.211  | 0.319 | 1.015  | 0.947   |
| pnm 30-40     | -1.408   | -2.295 | -0.521 | 0.319 | -4.416 | 0.000   |
| x ctrl-obs 20 | 0.117    | 0.025  | 0.210  | 0.033 | 3.524  | 0.004   |
| x ctrl-pnm 20 | 0.128    | 0.037  | 0.219  | 0.033 | 3.926  | 0.001   |
| x obs 20-30   | -0.013   | -0.103 | 0.078  | 0.033 | -0.396 | 1.000   |
| x pnm 20-30   | 0.005    | -0.066 | 0.077  | 0.026 | 0.206  | 1.000   |
| x pnm 30-40   | -0.077   | -0.148 | -0.006 | 0.026 | -3.018 | 0.024   |

Simply focusing on a few main questions, contrasts are evaluated:

The evolution over time is different for the pneumo 40 and 30, and for the pneumo 20 versus control. For obstruction, only the 20 versus the control shows a different evolution. At rank 10, the pneumo 30 and 40 differ, and the control versus the two 20 conditions.

The predictions can be visualized as follows:

Table 63: variance - covariance: pco2Kpa

|             | Variance  | StdDev    | Corr   |
|-------------|-----------|-----------|--------|
| (Intercept) | 1.4316983 | 1.1965359 | (Intr) |
| rank        | 0.0395132 | 0.1987793 | -0.39  |
| Residual    | 0.2621183 | 0.5119749 |        |

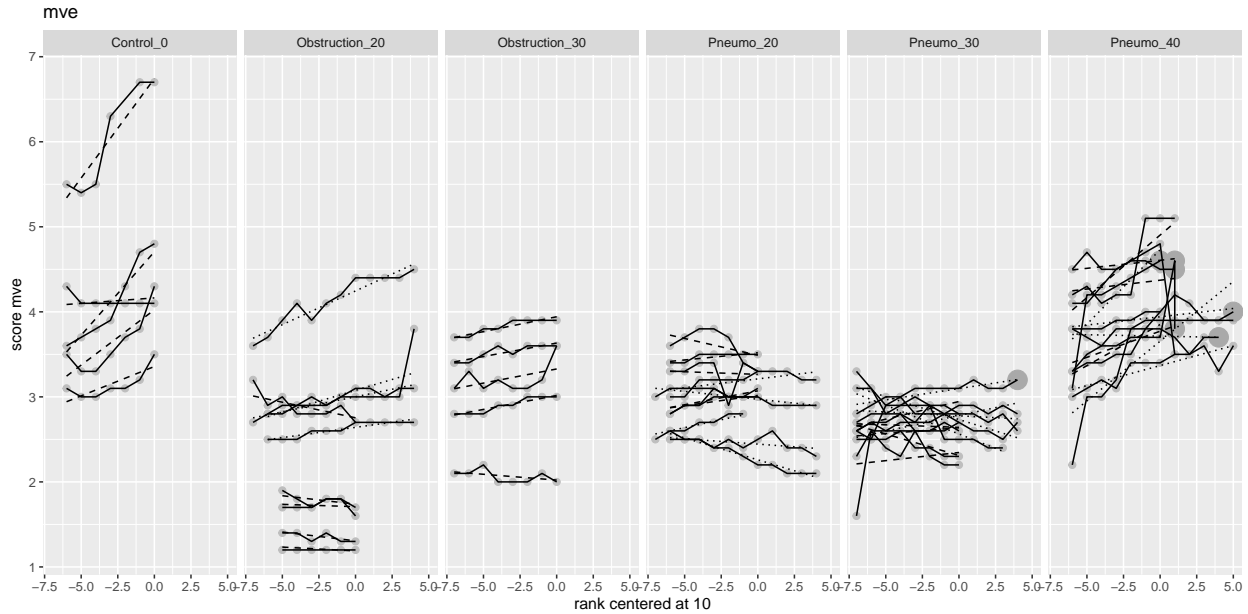

A few checks are made to verify the quality of the model. No severe distortions are observed, only some distortions at the extremes of the distribution.

Note that for this variable it appears that weight matters, higher values with heavier pigs.

## pco2Kpa

Different models are compared.

The final model allows for a pig specific intercept and slope, but does not include a pig specific evolution, following the AIC criterion.

The random intercept and slope variance and residual variance are shown (the pig specific variances are not):

Looking at the random intercept variance and the residual variance, there seems to be a very strong intra-class correlation, illustrating that different pigs score different in average, conditional what else is in the model. The random slope is limited in size.

The typical output for the mean structure is included:

Simply focusing on a few main questions, contrasts are evaluated:

None of the contrast suggests any difference. This means that the data, with the evidence available, indicates that pigs differ in average and change but irrespective of the conditions.

Table 64: estimates: pco2Kpa

|                       | Value  | Std.Error | DF  | t-value | p-value |
|-----------------------|--------|-----------|-----|---------|---------|
| (Intercept)           | 5.490  | 0.854     | 361 | 6.425   | 0.000   |
| r10                   | -0.071 | 0.099     | 361 | -0.720  | 0.472   |
| cndObstruction_20     | 1.286  | 1.063     | 43  | 1.210   | 0.233   |
| cndObstruction_30     | 1.149  | 1.231     | 43  | 0.933   | 0.356   |
| cndPneumo_20          | 1.632  | 1.045     | 43  | 1.562   | 0.126   |
| cndPneumo_30          | 0.993  | 1.044     | 43  | 0.952   | 0.347   |
| cndPneumo_40          | -1.044 | 1.044     | 43  | -1.000  | 0.323   |
| r10:cndObstruction_20 | 0.092  | 0.122     | 361 | 0.755   | 0.451   |
| r10:cndObstruction_30 | 0.236  | 0.143     | 361 | 1.650   | 0.100   |
| r10:cndPneumo_20      | 0.146  | 0.120     | 361 | 1.219   | 0.224   |
| r10:cndPneumo_30      | 0.042  | 0.119     | 361 | 0.357   | 0.721   |
| r10:cndPneumo_40      | -0.138 | 0.120     | 361 | -1.150  | 0.251   |

Table 65: contrasts: pco2Kpa

|               | Estimate | lwr    | upr   | sigma | tstat  | pvalues |
|---------------|----------|--------|-------|-------|--------|---------|
| rank          | -0.071   | -0.342 | 0.200 | 0.099 | -0.720 | 0.988   |
| ctrl-obs 20   | -1.286   | -4.201 | 1.629 | 1.063 | -1.210 | 0.824   |
| ctrl-pnm 20   | -1.632   | -4.496 | 1.232 | 1.045 | -1.562 | 0.583   |
| obs 20-30     | 0.137    | -2.850 | 3.123 | 1.089 | 0.126  | 1.000   |
| pnm 20-30     | 0.639    | -1.689 | 2.967 | 0.849 | 0.752  | 0.985   |
| pnm 30-40     | 2.037    | -0.290 | 4.364 | 0.849 | 2.400  | 0.122   |
| x ctrl-obs 20 | -0.092   | -0.428 | 0.243 | 0.122 | -0.755 | 0.984   |
| x ctrl-pnm 20 | -0.146   | -0.474 | 0.182 | 0.120 | -1.219 | 0.819   |
| x obs 20-30   | -0.144   | -0.489 | 0.202 | 0.126 | -1.141 | 0.862   |
| x pnm 20-30   | 0.104    | -0.155 | 0.363 | 0.094 | 1.097  | 0.884   |
| x pnm 30-40   | 0.180    | -0.079 | 0.440 | 0.095 | 1.905  | 0.346   |

Table 66: variance - covariance: pp

|             | Variance    | StdDev    | Corr   |
|-------------|-------------|-----------|--------|
| (Intercept) | 23.61161679 | 4.8591786 | (Intr) |
| rank        | 0.09076757  | 0.3012766 | -0.346 |
| Residual    | 1.17058255  | 1.0819346 |        |

The predictions can be visualized as follows:

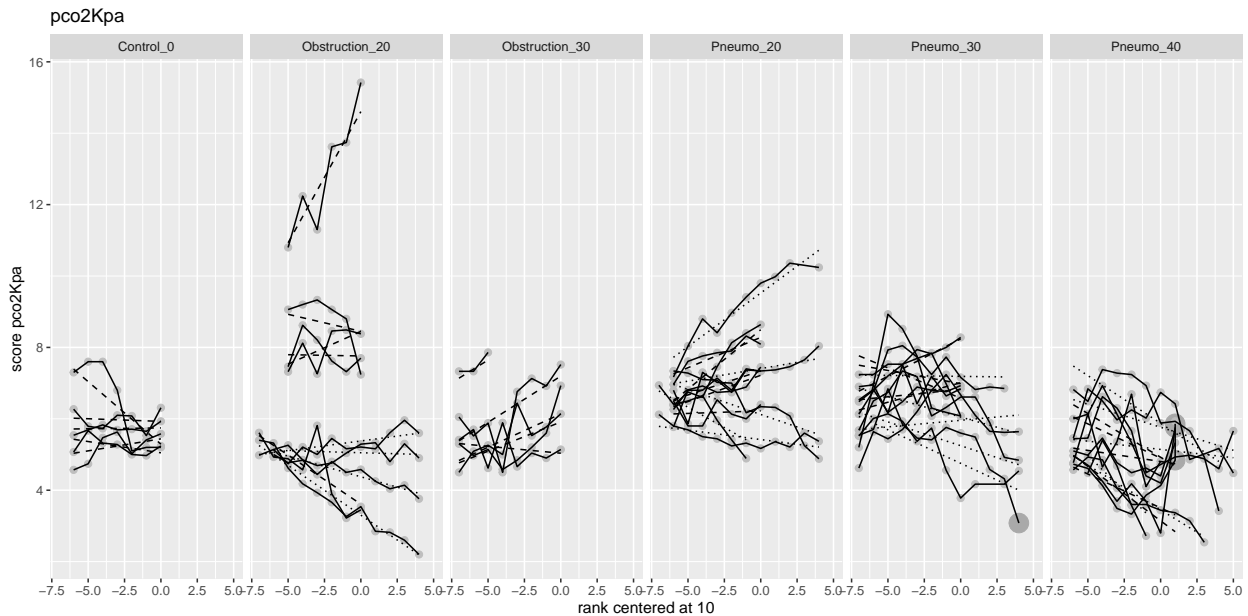

The visualization shows how the random slope is included in the data.

A few check are made to verify the quality of the model. No severe distortions are observed.

Note that for this variable it appears that both the weight (lower scores for heavier pigs) and the duration matter, with different evolutions for different durations.

## Resp: lowest priority

For the medium priority resp observations, the following variable is considered: etco2Hg,ppp,mpp,pp,peep,compl,complStat,comp

### pp

Different models are compared.

The final model allows for a pig specific intercept and slope variance, following the AIC criterion. The model with pig specific variances did not estimate.

The random intercept and slope variance and residual variance are shown:

Looking at the random intercept variance and the residual variance, there seems to be a strong intra-class correlation, illustrating that different pigs score different in average, conditional what else is in the model.

The typical output for the mean structure is included:



Table 67: estimates: pp

|                       | Value  | Std.Error | DF  | t-value | p-value |
|-----------------------|--------|-----------|-----|---------|---------|
| (Intercept)           | 19.943 | 2.149     | 366 | 9.278   | 0.000   |
| r10                   | 0.429  | 0.163     | 366 | 2.632   | 0.009   |
| cndObstruction_20     | 2.203  | 2.677     | 43  | 0.823   | 0.415   |
| cndObstruction_30     | 11.557 | 3.038     | 43  | 3.804   | 0.000   |
| cndPneumo_20          | 7.992  | 2.629     | 43  | 3.040   | 0.004   |
| cndPneumo_30          | 15.261 | 2.628     | 43  | 5.807   | 0.000   |
| cndPneumo_40          | 26.159 | 2.629     | 43  | 9.948   | 0.000   |
| r10:cndObstruction_20 | -0.208 | 0.200     | 366 | -1.042  | 0.298   |
| r10:cndObstruction_30 | 0.314  | 0.224     | 366 | 1.402   | 0.162   |
| r10:cndPneumo_20      | -0.247 | 0.196     | 366 | -1.261  | 0.208   |
| r10:cndPneumo_30      | 0.105  | 0.194     | 366 | 0.545   | 0.586   |
| r10:cndPneumo_40      | 0.619  | 0.196     | 366 | 3.153   | 0.002   |

Table 68: contrasts: pp

|               | Estimate | lwr     | upr    | sigma | tstat  | pvalues |
|---------------|----------|---------|--------|-------|--------|---------|
| rank          | 0.429    | -0.026  | 0.883  | 0.163 | 2.632  | 0.078   |
| ctrl-obs 20   | -2.203   | -9.676  | 5.270  | 2.677 | -0.823 | 0.989   |
| ctrl-pnm 20   | -7.992   | -15.333 | -0.651 | 2.629 | -3.040 | 0.023   |
| obs 20-30     | -9.354   | -16.822 | -1.887 | 2.674 | -3.498 | 0.005   |
| pnm 20-30     | -7.268   | -13.243 | -1.294 | 2.140 | -3.397 | 0.007   |
| pnm 30-40     | -10.898  | -16.873 | -4.923 | 2.140 | -5.093 | 0.000   |
| x ctrl-obs 20 | 0.208    | -0.350  | 0.767  | 0.200 | 1.042  | 0.950   |
| x ctrl-pnm 20 | 0.247    | -0.300  | 0.793  | 0.196 | 1.261  | 0.862   |
| x obs 20-30   | -0.523   | -1.062  | 0.016  | 0.193 | -2.707 | 0.064   |
| x pnm 20-30   | -0.352   | -0.773  | 0.069  | 0.151 | -2.337 | 0.167   |
| x pnm 30-40   | -0.513   | -0.937  | -0.090 | 0.152 | -3.387 | 0.007   |

Simply focusing on a few main questions, contrasts are evaluated:

For this variable, there is no indication of different evolutions, but at rank 10 it appears that the pneumo 20 is lower than 30, lower than 40. Also there is some evidence of the obstruction 20 being lower than 30.

The predictions can be visualized as follows:

Table 69: variance - covariance: ldh

|             | Variance   | StdDev    |
|-------------|------------|-----------|
| (Intercept) | 327754.642 | 572.49860 |
| Residual    | 2290.559   | 47.85979  |

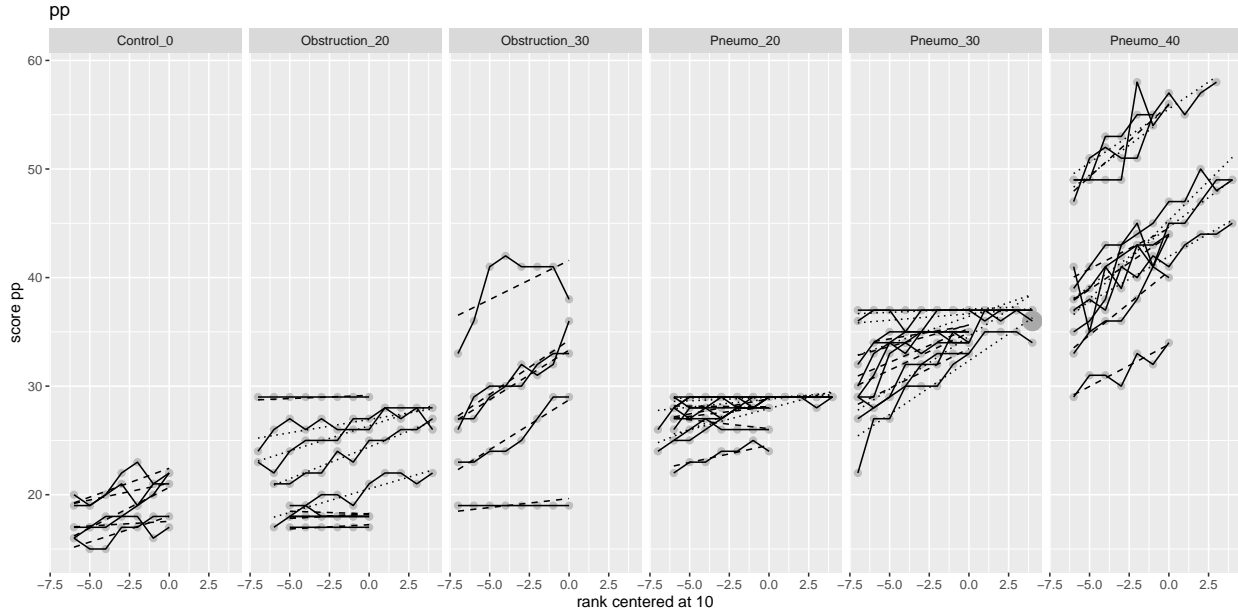

Especially noticeable are some extreme drops in the 40 condition. It also shows that within a condition some evolve, typically upwards, but some remain virtually constant. Because this is a lowest priority variable I do not study this further to improve it, the observations speak for themselves.

A few check are made to verify the quality of the model. There are some issues for this variable, most clear for the 40 condition but also for the other variables the assumption of normality seems to be a bit too strong.

Note that for this variable it appears that the evolution differs a bit for the different durations, 3 and 5.

## Gastro: medium priority

There are no highest priority gastro variables, only medium priorities. The following variables are considered consecutively: .

### ldh

Different models are compared.

The final model allows for a pig specific intercept and variance, but does not include a pig specific evolution, following the AIC criterion.

The random intercept variance and residual variance are shown (the pig specific variances are not):

Looking at the random intercept variance and the residual variance, there seems to be a very severe intra-class correlation, illustrating that different pigs score different in average, conditional what else is in the model.

Table 70: estimates: ldh

|                       | Value    | Std.Error | DF  | t-value | p-value |
|-----------------------|----------|-----------|-----|---------|---------|
| (Intercept)           | 1048.827 | 256.559   | 364 | 4.088   | 0.000   |
| r10                   | 0.747    | 3.734     | 364 | 0.200   | 0.842   |
| cndObstruction_20     | -11.657  | 320.128   | 43  | -0.036  | 0.971   |
| cndObstruction_30     | 401.298  | 362.845   | 43  | 1.106   | 0.275   |
| cndPneumo_20          | 197.499  | 314.343   | 43  | 0.628   | 0.533   |
| cndPneumo_30          | 173.120  | 314.123   | 43  | 0.551   | 0.584   |
| cndPneumo_40          | 288.394  | 314.769   | 43  | 0.916   | 0.365   |
| r10:cndObstruction_20 | 3.822    | 4.173     | 364 | 0.916   | 0.360   |
| r10:cndObstruction_30 | 0.073    | 4.417     | 364 | 0.016   | 0.987   |
| r10:cndPneumo_20      | 17.875   | 4.462     | 364 | 4.007   | 0.000   |
| r10:cndPneumo_30      | 16.029   | 4.118     | 364 | 3.892   | 0.000   |
| r10:cndPneumo_40      | 12.674   | 4.091     | 364 | 3.098   | 0.002   |

Table 71: contrasts: ldh

|               | Estimate | lwr       | upr     | sigma   | tstat  | pvalues |
|---------------|----------|-----------|---------|---------|--------|---------|
| rank          | 0.747    | -9.673    | 11.167  | 3.734   | 0.200  | 1.000   |
| ctrl-obs 20   | 11.657   | -881.759  | 905.072 | 320.128 | 0.036  | 1.000   |
| ctrl-pnm 20   | -197.499 | -1074.769 | 679.771 | 314.343 | -0.628 | 0.999   |
| obs 20-30     | -412.955 | -1306.419 | 480.509 | 320.145 | -1.290 | 0.852   |
| pnm 20-30     | 24.378   | -691.718  | 740.475 | 256.591 | 0.095  | 1.000   |
| pnm 30-40     | -115.274 | -832.829  | 602.282 | 257.114 | -0.448 | 1.000   |
| x ctrl-obs 20 | -3.822   | -15.469   | 7.825   | 4.173   | -0.916 | 0.979   |
| x ctrl-pnm 20 | -17.875  | -30.327   | -5.424  | 4.462   | -4.007 | 0.001   |
| x obs 20-30   | 3.749    | -4.646    | 12.145  | 3.008   | 1.246  | 0.874   |
| x pnm 20-30   | 1.846    | -6.519    | 10.212  | 2.998   | 0.616  | 0.999   |
| x pnm 30-40   | 3.355    | -3.378    | 10.087  | 2.412   | 1.391  | 0.792   |

The typical output for the mean structure is included:

Simply focusing on a few main questions, contrasts are evaluated:

For this variable, there is only one effect, the evolution within the control condition is less strong than the evolution of the pneumo condition for 20.

The predictions can be visualized as follows:

Table 72: variance - covariance: lip

|             | Variance  | StdDev    |
|-------------|-----------|-----------|
| (Intercept) | 2.1021336 | 1.4498737 |
| Residual    | 0.2817322 | 0.5307845 |

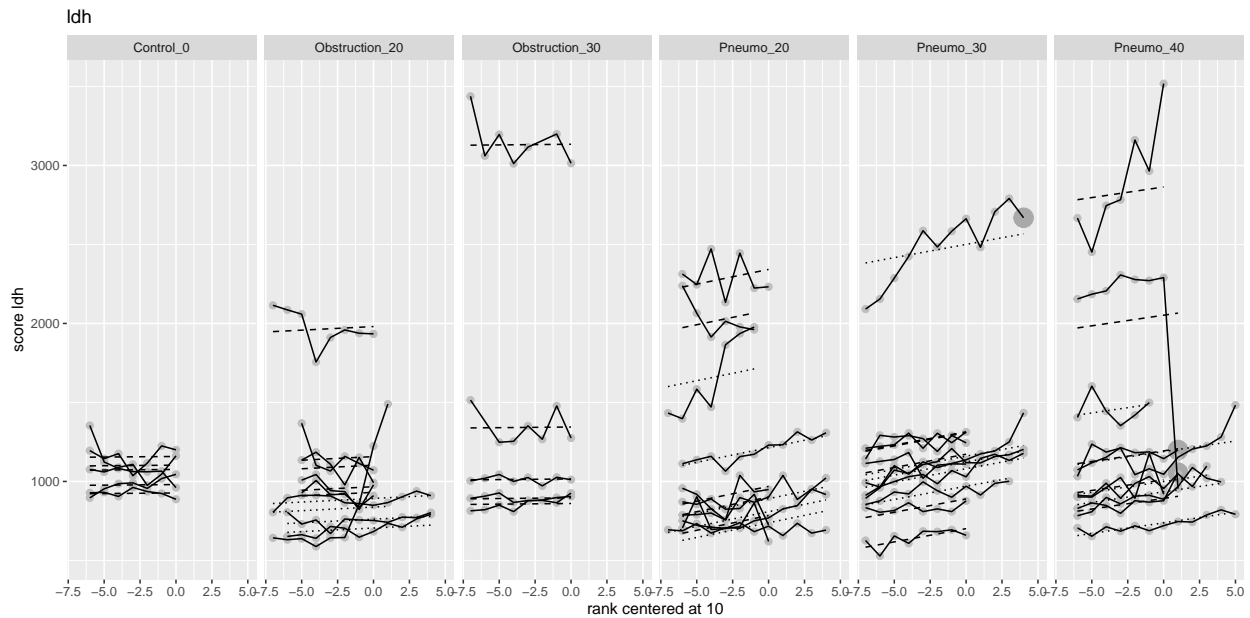

Some evolutions are well described by the average predicted evolution, but clearly there are various observations that do not in any way reflect the estimated model.

A few checks are made to verify the quality of the model. No severe distortions are observed. There are maybe a few very high values observed for the random effects.

Note that for this variable it appears that the evolution runs somewhat differently for the duration 3 and 5.

## lip

Different models are compared.

The final model allows for a pig-specific intercept and variance, but does not include a pig-specific evolution, following the AIC criterion.

The random intercept variance and residual variance are shown (the pig-specific variances are not):

Looking at the random intercept variance and the residual variance, there seems to be a very strong intra-class correlation, illustrating that different pigs score differently in average, conditional on what else is in the model.

The typical output for the mean structure is included:

Simply focusing on a few main questions, contrasts are evaluated:

There is only one effect of evolution, the evolution is stronger for the obstruction 20 versus 30.

Table 73: estimates lip

|                       | Value | Std.Error | DF  | t-value | p-value |
|-----------------------|-------|-----------|-----|---------|---------|
| (Intercept)           | 3.718 | 0.659     | 365 | 5.645   | 0.000   |
| r10                   | 0.022 | 0.031     | 365 | 0.724   | 0.469   |
| cndObstruction_20     | 3.905 | 0.846     | 43  | 4.614   | 0.000   |
| cndObstruction_30     | 8.578 | 1.022     | 43  | 8.391   | 0.000   |
| cndPneumo_20          | 2.763 | 0.812     | 43  | 3.404   | 0.001   |
| cndPneumo_30          | 4.423 | 0.854     | 43  | 5.181   | 0.000   |
| cndPneumo_40          | 5.388 | 0.886     | 43  | 6.084   | 0.000   |
| r10:cndObstruction_20 | 0.058 | 0.042     | 365 | 1.381   | 0.168   |
| r10:cndObstruction_30 | 0.342 | 0.087     | 365 | 3.919   | 0.000   |
| r10:cndPneumo_20      | 0.067 | 0.034     | 365 | 1.992   | 0.047   |
| r10:cndPneumo_30      | 0.119 | 0.039     | 365 | 3.070   | 0.002   |
| r10:cndPneumo_40      | 0.278 | 0.066     | 365 | 4.227   | 0.000   |

Table 74: contrasts: lip

|               | Estimate | lwr    | upr    | sigma | tstat  | pvalues |
|---------------|----------|--------|--------|-------|--------|---------|
| rank          | 0.022    | -0.064 | 0.109  | 0.031 | 0.724  | 0.997   |
| ctrl-obs 20   | -3.905   | -6.270 | -1.539 | 0.846 | -4.614 | 0.000   |
| ctrl-pnm 20   | -2.763   | -5.032 | -0.494 | 0.812 | -3.404 | 0.007   |
| obs 20-30     | -4.674   | -7.316 | -2.031 | 0.945 | -4.944 | 0.000   |
| pnm 20-30     | -1.660   | -3.675 | 0.355  | 0.721 | -2.303 | 0.185   |
| pnm 30-40     | -0.965   | -3.211 | 1.280  | 0.803 | -1.202 | 0.902   |
| x ctrl-obs 20 | -0.058   | -0.175 | 0.059  | 0.042 | -1.381 | 0.806   |
| x ctrl-pnm 20 | -0.067   | -0.161 | 0.027  | 0.034 | -1.992 | 0.357   |
| x obs 20-30   | -0.284   | -0.525 | -0.043 | 0.086 | -3.290 | 0.010   |
| x pnm 20-30   | -0.052   | -0.128 | 0.024  | 0.027 | -1.915 | 0.409   |
| x pnm 30-40   | -0.159   | -0.335 | 0.016  | 0.063 | -2.541 | 0.102   |

Table 75: variance - covariance: alt

|             | Variance  | StdDev   |
|-------------|-----------|----------|
| (Intercept) | 87.938714 | 9.377564 |
| Residual    | 6.809711  | 2.609542 |

The predictions can be visualized as follows:

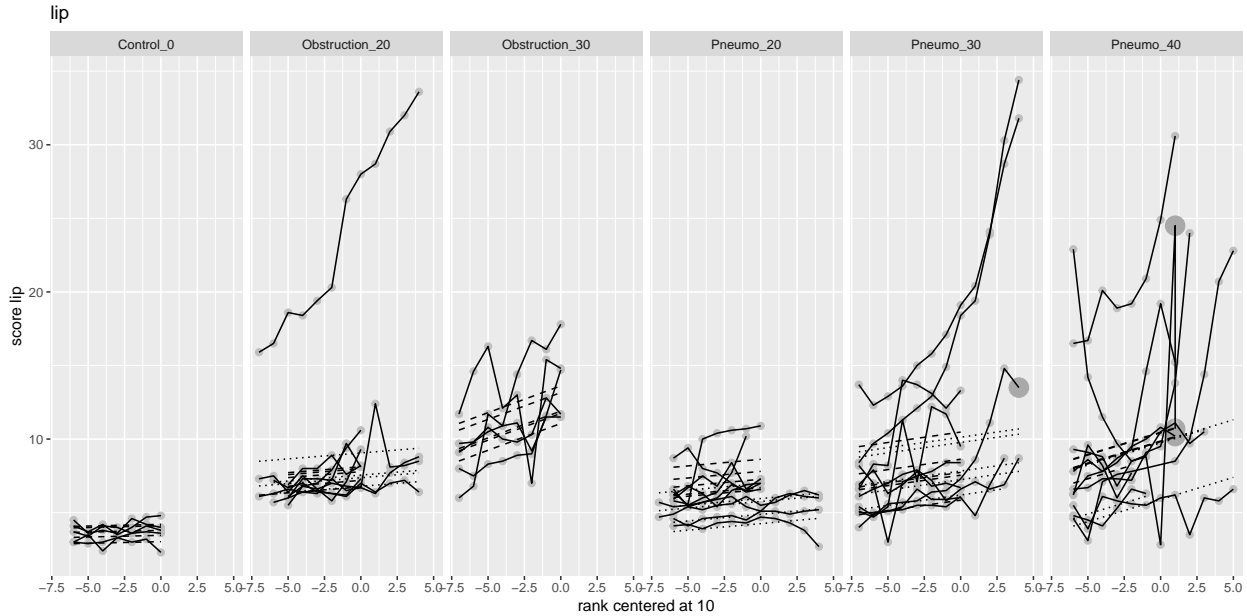

With respect to the effect, note that there is one pig for which contrary to what was suggested by the effect the evolution is particularly strong in the 20 condition (obstruction). The 40 condition also seems to show some evolutions that are not captured by the model.

A few check are made to verify the quality of the model. No severe distortions are observed.

Note that for this variable it appears that the evolution runs somewhat different for the duration 3 and 5.

## Gastro: lowest priority

There are no highest priority gastro variables, only medium priorities. The following variables are considered consecutively: .

### alt

Different models are compared.

The final model allows for a pig specific intercept and variance, but does not include a pig specific evolution, following the AIC criterion.

The random intercept variance and residual variance are shown (the pig specific variances are not):

Looking at the random intercept variance and the residual variance, there seems to be a very strong intra-class correlation, illustrating that different pigs score different in average, conditional what else is in the model.

Table 76: estimates: alt

|                       | Value  | Std.Error | DF  | t-value | p-value |
|-----------------------|--------|-----------|-----|---------|---------|
| (Intercept)           | 36.321 | 4.265     | 368 | 8.517   | 0.000   |
| r10                   | -0.063 | 0.208     | 368 | -0.300  | 0.764   |
| cndObstruction_20     | -8.925 | 5.314     | 43  | -1.680  | 0.100   |
| cndObstruction_30     | 10.317 | 6.200     | 43  | 1.664   | 0.103   |
| cndPneumo_20          | -5.435 | 5.252     | 43  | -1.035  | 0.306   |
| cndPneumo_30          | 4.603  | 5.217     | 43  | 0.882   | 0.382   |
| cndPneumo_40          | -8.023 | 5.240     | 43  | -1.531  | 0.133   |
| r10:cndObstruction_20 | 0.083  | 0.255     | 368 | 0.324   | 0.746   |
| r10:cndObstruction_30 | 0.974  | 0.413     | 368 | 2.358   | 0.019   |
| r10:cndPneumo_20      | 0.082  | 0.270     | 368 | 0.302   | 0.763   |
| r10:cndPneumo_30      | 0.719  | 0.229     | 368 | 3.136   | 0.002   |
| r10:cndPneumo_40      | 0.421  | 0.264     | 368 | 1.595   | 0.112   |

Table 77: contrasts: alt

|               | Estimate | lwr     | upr    | sigma | tstat  | pvalues |
|---------------|----------|---------|--------|-------|--------|---------|
| rank          | -0.063   | -0.644  | 0.519  | 0.208 | -0.300 | 1.000   |
| ctrl-obs 20   | 8.925    | -5.935  | 23.784 | 5.314 | 1.680  | 0.588   |
| ctrl-pnm 20   | 5.435    | -9.252  | 20.123 | 5.252 | 1.035  | 0.958   |
| obs 20-30     | -19.242  | -34.636 | -3.848 | 5.504 | -3.496 | 0.005   |
| pnm 20-30     | -10.039  | -22.041 | 1.964  | 4.292 | -2.339 | 0.170   |
| pnm 30-40     | 12.626   | 0.662   | 24.590 | 4.278 | 2.951  | 0.031   |
| x ctrl-obs 20 | -0.083   | -0.796  | 0.630  | 0.255 | -0.324 | 1.000   |
| x ctrl-pnm 20 | -0.082   | -0.836  | 0.673  | 0.270 | -0.302 | 1.000   |
| x obs 20-30   | -0.891   | -1.971  | 0.188  | 0.386 | -2.309 | 0.183   |
| x pnm 20-30   | -0.638   | -1.188  | -0.087 | 0.197 | -3.239 | 0.012   |
| x pnm 30-40   | 0.299    | -0.229  | 0.826  | 0.189 | 1.584  | 0.662   |

The typical output for the mean structure is included:

Simply focusing on a few main questions, contrasts are evaluated:

For this variable, there is only one difference in evolution, between the pneumo 20 and 30. At rank 10, there is a difference between pneumo 30 and 40, and between obstruction 20 and 30.

The predictions can be visualized as follows:

Table 78: variance - covariance: ggt

|             | Variance | StdDev   |
|-------------|----------|----------|
| (Intercept) | 55.75186 | 7.466717 |
| Residual    | 61.98721 | 7.873195 |

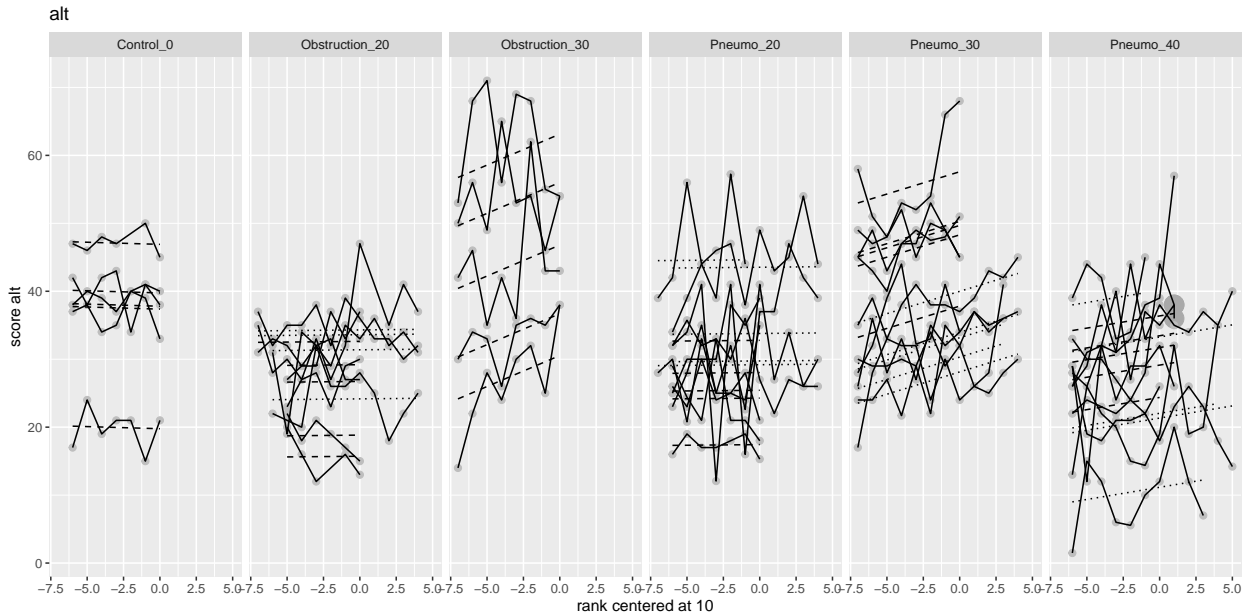

Most evolutions are fairly well described by the average predicted evolution.

A few check are made to verify the quality of the model. No severe distortions are observed.

## ggt

Different models are compared.

The final model allows for a pig specific intercept and variance, but does not include a pig specific evolution, following the AIC criterion.

The random intercept variance and residual variance are shown (the pig specific variances are not):

Looking at the random intercept variance and the residual variance, there seems to be a moderate intra-class correlation, illustrating that different pigs score different in average, conditional what else is in the model.

The typical output for the mean structure is included:

Simply focusing on a few main questions, contrasts are evaluated:

The evolution differs between pneumo 20 and 30, and between the control and each of the 20 conditions. No differences are observed at rank 10.

The predictions can be visualized as follows:



Table 79: estimates ggt

|                       | Value  | Std.Error | DF  | t-value | p-value |
|-----------------------|--------|-----------|-----|---------|---------|
| (Intercept)           | 26.531 | 3.945     | 366 | 6.725   | 0.000   |
| r10                   | -1.736 | 0.545     | 366 | -3.186  | 0.002   |
| cndObstruction_20     | 8.578  | 4.704     | 43  | 1.823   | 0.075   |
| cndObstruction_30     | 14.078 | 5.285     | 43  | 2.664   | 0.011   |
| cndPneumo_20          | 3.283  | 4.624     | 43  | 0.710   | 0.482   |
| cndPneumo_30          | 6.597  | 4.621     | 43  | 1.428   | 0.161   |
| cndPneumo_40          | 7.803  | 4.637     | 43  | 1.683   | 0.100   |
| r10:cndObstruction_20 | 1.692  | 0.560     | 366 | 3.020   | 0.003   |
| r10:cndObstruction_30 | 2.324  | 0.601     | 366 | 3.864   | 0.000   |
| r10:cndPneumo_20      | 1.651  | 0.554     | 366 | 2.982   | 0.003   |
| r10:cndPneumo_30      | 2.304  | 0.554     | 366 | 4.161   | 0.000   |
| r10:cndPneumo_40      | 2.111  | 0.565     | 366 | 3.734   | 0.000   |

Table 80: contrasts: ggt

|               | Estimate | lwr     | upr    | sigma | tstat  | pvalues |
|---------------|----------|---------|--------|-------|--------|---------|
| rank          | -1.736   | -3.243  | -0.230 | 0.545 | -3.186 | 0.013   |
| ctrl-obs 20   | -8.578   | -21.581 | 4.425  | 4.704 | -1.823 | 0.448   |
| ctrl-pnm 20   | -3.283   | -16.065 | 9.500  | 4.624 | -0.710 | 0.995   |
| obs 20-30     | -5.500   | -17.527 | 6.527  | 4.351 | -1.264 | 0.850   |
| pnm 20-30     | -3.314   | -12.733 | 6.104  | 3.407 | -0.973 | 0.963   |
| pnm 30-40     | -1.206   | -10.671 | 8.258  | 3.424 | -0.352 | 1.000   |
| x ctrl-obs 20 | -1.692   | -3.241  | -0.143 | 0.560 | -3.020 | 0.023   |
| x ctrl-pnm 20 | -1.651   | -3.182  | -0.121 | 0.554 | -2.982 | 0.026   |
| x obs 20-30   | -0.632   | -1.422  | 0.158  | 0.286 | -2.210 | 0.211   |
| x pnm 20-30   | -0.653   | -1.039  | -0.267 | 0.140 | -4.675 | 0.000   |
| x pnm 30-40   | 0.194    | -0.305  | 0.692  | 0.180 | 1.073  | 0.935   |

Table 81: variance - covariance: alp

|             | Variance  | StdDev   |
|-------------|-----------|----------|
| (Intercept) | 8460.3341 | 91.98007 |
| Residual    | 178.2463  | 13.35089 |

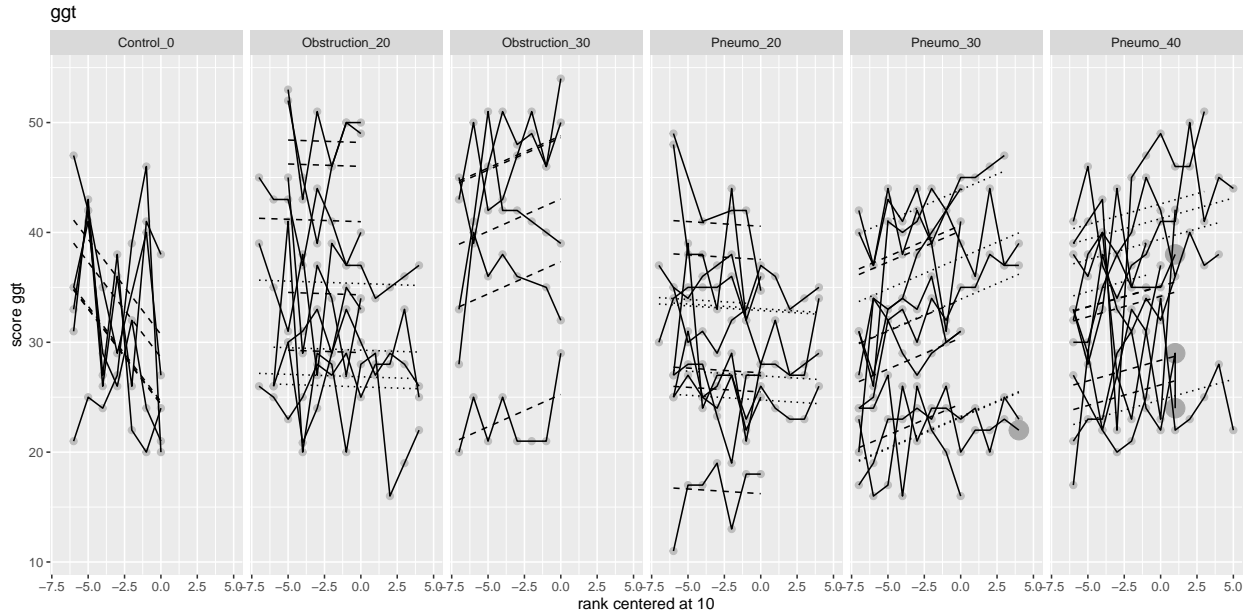

Note that some values were much higher than the model would assume.

A few check are made to verify the quality of the model. No severe distortions are observed.

## alp

Different models are compared.

The final model allows for a pig specific intercept and variance, but does not include a pig specific evolution, following the AIC criterion.

The random intercept variance and residual variance are shown (the pig specific variances are not):

Looking at the random intercept variance and the residual variance, there seems to be an extreme intra-class correlation, illustrating that different pigs score different in average, conditional what else is in the model.

The typical output for the mean structure is included:

Simply focusing on a few main questions, contrasts are evaluated:

Evolutions differ, between the control, pneumo 20, 30 and 40, and control, obstruction 20 and 30. At rank 10, nothing differs.

The predictions can be visualized as follows:

Table 82: estimates: alp

|                       | Value   | Std.Error | DF  | t-value | p-value |
|-----------------------|---------|-----------|-----|---------|---------|
| (Intercept)           | 391.674 | 41.455    | 363 | 9.448   | 0.000   |
| r10                   | -2.991  | 0.415     | 363 | -7.201  | 0.000   |
| cndObstruction_20     | -92.343 | 51.667    | 43  | -1.787  | 0.081   |
| cndObstruction_30     | 5.927   | 58.746    | 43  | 0.101   | 0.920   |
| cndPneumo_20          | -30.418 | 50.764    | 43  | -0.599  | 0.552   |
| cndPneumo_30          | -53.167 | 50.797    | 43  | -1.047  | 0.301   |
| cndPneumo_40          | 36.031  | 50.773    | 43  | 0.710   | 0.482   |
| r10:cndObstruction_20 | 3.043   | 0.775     | 363 | 3.929   | 0.000   |
| r10:cndObstruction_30 | 11.098  | 1.480     | 363 | 7.498   | 0.000   |
| r10:cndPneumo_20      | 9.247   | 0.864     | 363 | 10.699  | 0.000   |
| r10:cndPneumo_30      | 12.658  | 0.738     | 363 | 17.149  | 0.000   |
| r10:cndPneumo_40      | 18.599  | 0.872     | 363 | 21.319  | 0.000   |

Table 83: contrasts: alp

|               | Estimate | lwr      | upr     | sigma  | tstat   | pvalues |
|---------------|----------|----------|---------|--------|---------|---------|
| rank          | -2.991   | -4.157   | -1.824  | 0.415  | -7.201  | 0.000   |
| ctrl-obs 20   | 92.343   | -52.760  | 237.447 | 51.667 | 1.787   | 0.519   |
| ctrl-pnm 20   | 30.418   | -112.150 | 172.987 | 50.764 | 0.599   | 0.999   |
| obs 20-30     | -98.270  | -243.754 | 47.214  | 51.802 | -1.897  | 0.436   |
| pnm 20-30     | 22.749   | -93.733  | 139.232 | 41.476 | 0.548   | 1.000   |
| pnm 30-40     | -89.198  | -205.712 | 27.316  | 41.487 | -2.150  | 0.270   |
| x ctrl-obs 20 | -3.043   | -5.219   | -0.868  | 0.775  | -3.929  | 0.001   |
| x ctrl-pnm 20 | -9.247   | -11.674  | -6.820  | 0.864  | -10.699 | 0.000   |
| x obs 20-30   | -8.055   | -12.447  | -3.662  | 1.564  | -5.150  | 0.000   |
| x pnm 20-30   | -3.411   | -6.144   | -0.678  | 0.973  | -3.506  | 0.005   |
| x pnm 30-40   | -5.941   | -8.694   | -3.188  | 0.980  | -6.061  | 0.000   |

Table 84: variance - covariance: totBilMg

|             | Variance     | StdDev     |
|-------------|--------------|------------|
| (Intercept) | 0.0177694658 | 0.13330216 |
| Residual    | 0.0001871685 | 0.01368095 |

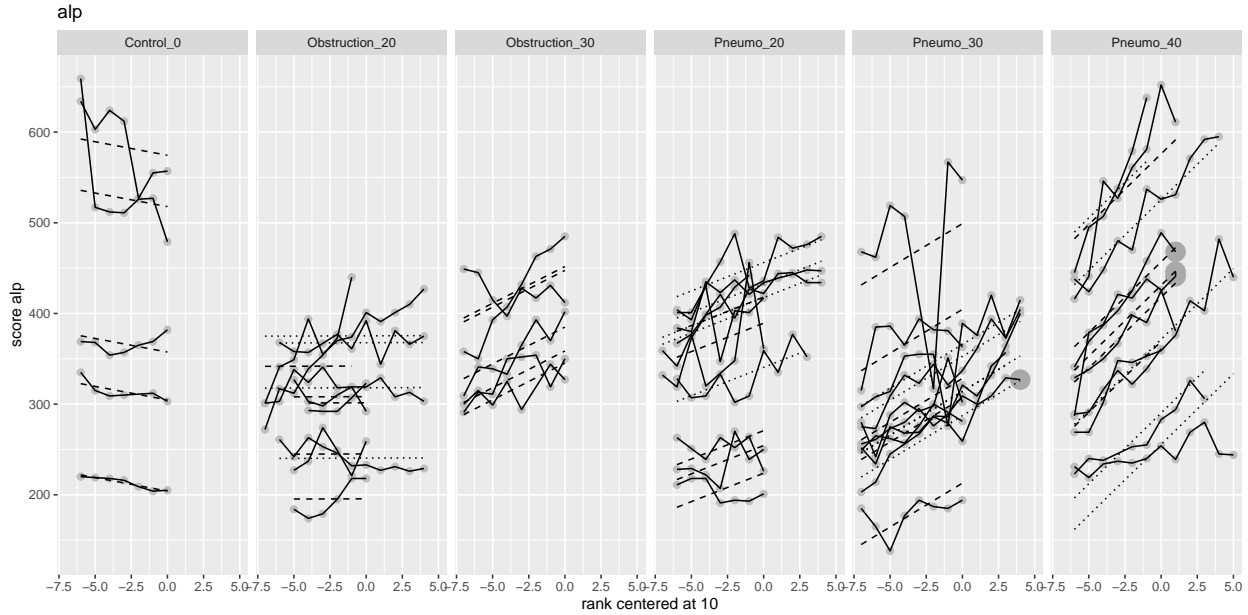

Most evolutions are well described by the average predicted evolution, but clearly there are anomalous observations.

A few checks are made to verify the quality of the model. No severe distortions are observed. There are maybe a few very high values observed for the random effects.

Note that for this variable it appears that the evolution runs somewhat differently for the duration 3 and 5.

## totBilMg

Different models are compared.

The final model allows for a pig-specific intercept and variance, but does not include a pig-specific evolution, following the AIC criterion.

The random intercept variance and residual variance are shown (the pig-specific variances are not):

Looking at the random intercept variance and the residual variance, there seems to be an extreme intra-class correlation, illustrating that different pigs score differently in average, conditional on what else is in the model.

The typical output for the mean structure is included:

Simply focusing on a few main questions, contrasts are evaluated:

The evolutions differ between the pneumo and obstruction conditions 20 and 30, and between the control and the obstruction 20. At rank 10 there is only a difference between the pneumo 20 and 30.

Table 85: estimates totBilMg

|                       | Value  | Std.Error | DF  | t-value | p-value |
|-----------------------|--------|-----------|-----|---------|---------|
| (Intercept)           | 0.295  | 0.061     | 358 | 4.849   | 0.000   |
| r10                   | 0.007  | 0.002     | 358 | 3.032   | 0.003   |
| cndObstruction_20     | -0.108 | 0.076     | 43  | -1.424  | 0.162   |
| cndObstruction_30     | 0.081  | 0.086     | 43  | 0.935   | 0.355   |
| cndPneumo_20          | -0.161 | 0.074     | 43  | -2.171  | 0.036   |
| cndPneumo_30          | 0.084  | 0.074     | 43  | 1.129   | 0.265   |
| cndPneumo_40          | 0.242  | 0.075     | 43  | 3.247   | 0.002   |
| r10:cndObstruction_20 | -0.019 | 0.003     | 358 | -6.928  | 0.000   |
| r10:cndObstruction_30 | 0.004  | 0.003     | 358 | 1.333   | 0.183   |
| r10:cndPneumo_20      | -0.005 | 0.002     | 358 | -2.256  | 0.025   |
| r10:cndPneumo_30      | 0.022  | 0.003     | 358 | 8.544   | 0.000   |
| r10:cndPneumo_40      | 0.021  | 0.003     | 358 | 7.242   | 0.000   |

Table 86: contrasts: totBilMg

|               | Estimate | lwr    | upr    | sigma | tstat   | pvalues |
|---------------|----------|--------|--------|-------|---------|---------|
| rank          | 0.007    | 0.001  | 0.013  | 0.002 | 3.032   | 0.023   |
| ctrl-obs 20   | 0.108    | -0.103 | 0.319  | 0.076 | 1.424   | 0.769   |
| ctrl-pnm 20   | 0.161    | -0.046 | 0.368  | 0.074 | 2.171   | 0.244   |
| obs 20-30     | -0.189   | -0.402 | 0.024  | 0.076 | -2.472  | 0.119   |
| pnm 20-30     | -0.245   | -0.413 | -0.077 | 0.060 | -4.060  | 0.001   |
| pnm 30-40     | -0.158   | -0.327 | 0.012  | 0.061 | -2.599  | 0.085   |
| x ctrl-obs 20 | 0.019    | 0.011  | 0.026  | 0.003 | 6.928   | 0.000   |
| x ctrl-pnm 20 | 0.005    | -0.001 | 0.012  | 0.002 | 2.256   | 0.202   |
| x obs 20-30   | -0.023   | -0.031 | -0.015 | 0.003 | -8.195  | 0.000   |
| x pnm 20-30   | -0.027   | -0.031 | -0.023 | 0.001 | -19.330 | 0.000   |
| x pnm 30-40   | 0.001    | -0.005 | 0.007  | 0.002 | 0.450   | 1.000   |

Table 87: variance - covariance: plat

|             | Variance    | StdDev     |
|-------------|-------------|------------|
| (Intercept) | 14889.93091 | 122.024305 |
| Residual    | 62.28807    | 7.892279   |

The predictions can be visualized as follows:

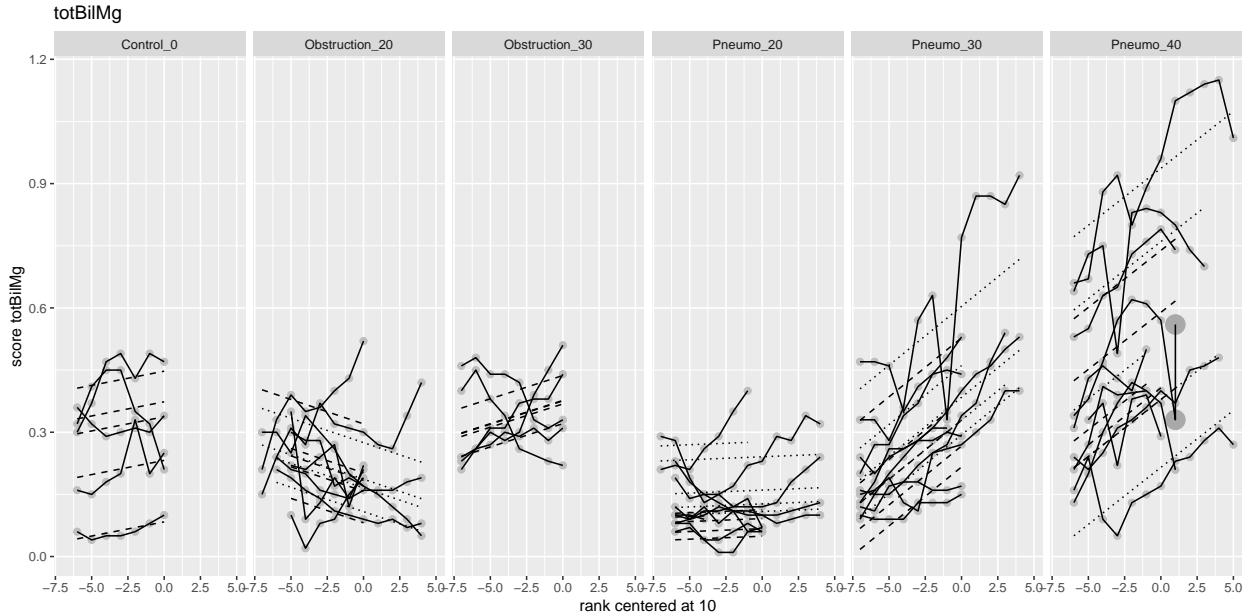

Most evolutions are fairly well captured by the model.

A few check are made to verify the quality of the model. No severe distortions are observed.

Note that for this variable it appears that the evolution runs somewhat different for the duration 3 and 5.

## Haema: medium priority

There are no highest priority Haema variables, one medium priorities .

### plat

Different models are compared.

The final model allows for a pig specific intercept and variance, but does not include a pig specific evolution, following the AIC criterion.

The random intercept variance and residual variance are shown (the pig specific variances are not):

Looking at the random intercept variance and the residual variance, there seems to be a very extreme intra-class correlation, illustrating that different pigs score different in average, conditional what else is in the model.

The typical output for the mean structure is included:

Table 88: estimates: plat

|                       | Value   | Std.Error | DF  | t-value | p-value |
|-----------------------|---------|-----------|-----|---------|---------|
| (Intercept)           | 385.284 | 54.881    | 370 | 7.020   | 0.000   |
| r10                   | 2.768   | 1.240     | 370 | 2.233   | 0.026   |
| cndObstruction_20     | -25.041 | 68.389    | 43  | -0.366  | 0.716   |
| cndObstruction_30     | -90.937 | 77.482    | 43  | -1.174  | 0.247   |
| cndPneumo_20          | 55.184  | 67.174    | 43  | 0.821   | 0.416   |
| cndPneumo_30          | 195.962 | 67.254    | 43  | 2.914   | 0.006   |
| cndPneumo_40          | 16.164  | 67.214    | 43  | 0.240   | 0.811   |
| r10:cndObstruction_20 | -7.252  | 1.384     | 370 | -5.240  | 0.000   |
| r10:cndObstruction_30 | -7.967  | 1.483     | 370 | -5.371  | 0.000   |
| r10:cndPneumo_20      | -9.525  | 1.392     | 370 | -6.843  | 0.000   |
| r10:cndPneumo_30      | -2.981  | 1.539     | 370 | -1.938  | 0.053   |
| r10:cndPneumo_40      | -9.719  | 1.474     | 370 | -6.595  | 0.000   |

Table 89: contrasts: plat

|               | Estimate | lwr      | upr     | sigma  | tstat  | pvalues |
|---------------|----------|----------|---------|--------|--------|---------|
| rank          | 2.768    | -0.684   | 6.221   | 1.240  | 2.233  | 0.211   |
| ctrl-obs 20   | 25.041   | -165.415 | 215.497 | 68.389 | 0.366  | 1.000   |
| ctrl-pnm 20   | -55.184  | -242.259 | 131.891 | 67.174 | -0.821 | 0.989   |
| obs 20-30     | 65.896   | -124.147 | 255.938 | 68.240 | 0.966  | 0.969   |
| pnm 20-30     | -140.778 | -293.610 | 12.054  | 54.879 | -2.565 | 0.093   |
| pnm 30-40     | 179.797  | 26.831   | 332.763 | 54.927 | 3.273  | 0.010   |
| x ctrl-obs 20 | 7.252    | 3.397    | 11.106  | 1.384  | 5.240  | 0.000   |
| x ctrl-pnm 20 | 9.525    | 5.649    | 13.402  | 1.392  | 6.843  | 0.000   |
| x obs 20-30   | 0.716    | -2.127   | 3.559   | 1.021  | 0.701  | 0.997   |
| x pnm 20-30   | -6.544   | -9.634   | -3.453  | 1.110  | -5.897 | 0.000   |
| x pnm 30-40   | 6.738    | 3.366    | 10.110  | 1.211  | 5.565  | 0.000   |

Simply focusing on a few main questions, contrasts are evaluated:

All consecutive pneumo measurements differ in their evolution, suggesting an less evolution in the 30 condition. The control condition also differs, from the 20 conditions in both pneumo and obstruction. The only difference at rank 10 is between the pneumo 30 and 40.

The predictions can be visualized as follows:

Most evolutions are quite well described by the average predicted evolution.

A few check are made to verify the quality of the model. No severe distortions are observed, maybe suggesting one value that is a bit different.

Note that for this variable it appears that the evolution runs somewhat different for the duration 3 and 5.

## Haema: lowest priority

The lowest priority Haema variables are hb,rcc,hema,hemo,wcc,plat,aptt,ptt,activ,inr,crp.

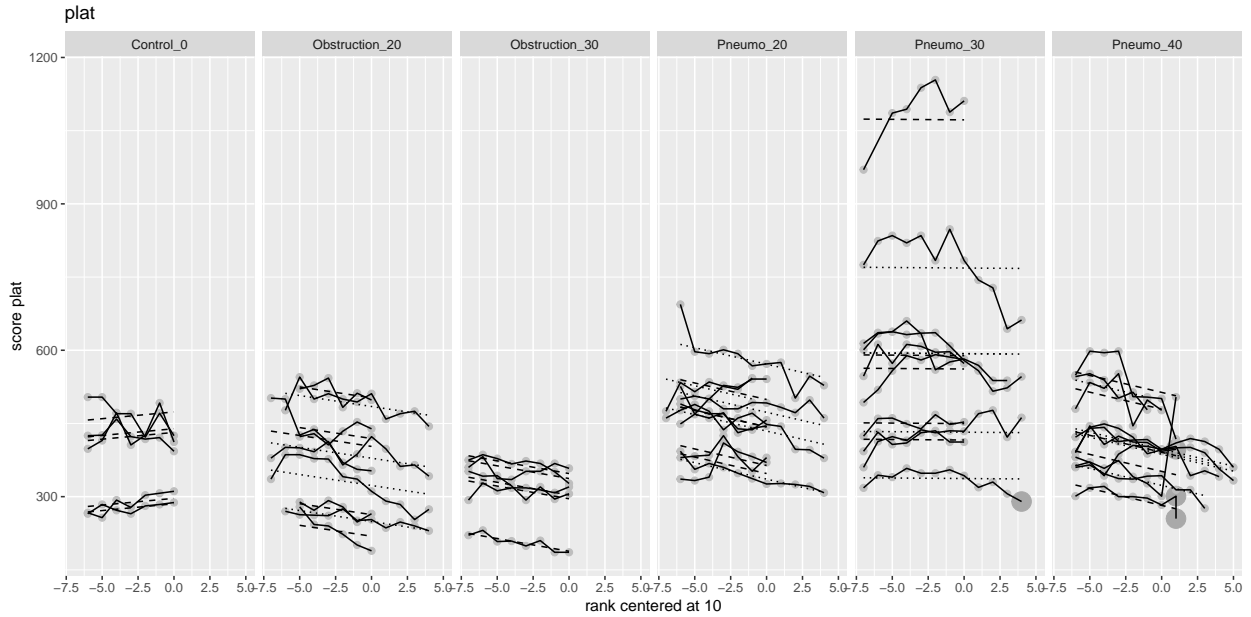

Figure 5: plat: predicted evolution and data

Table 90: variance - covariance: aptt

|             | Variance   | StdDev    |
|-------------|------------|-----------|
| (Intercept) | 604.230272 | 24.581096 |
| Residual    | 4.334939   | 2.082052  |

## aptt

Different models are compared. Note that due to convergence issues, the REML is turned into an ML for the chosen model.

The final model allows for a pig specific intercept and variance, but does not include a pig specific evolution, following the AIC criterion.

The random intercept variance and residual variance are shown (the pig specific variances are not):

Looking at the random intercept variance and the residual variance, there seems to be a very very extreme intra-class correlation, illustrating that different pigs score different in average, conditional what else is in the model.

The typical output for the mean structure is included:

Simply focusing on a few main questions, contrasts are evaluated:

As the figure suggests, there are several complicating issues here. The evolutions is suggested to be limited in most cases, with severe jumps in other cases, going up seemingly to a ceiling at 600. Maybe this analysis should at most be dealt with in a descriptive way, without taking the statistical results too seriously.

The statistical results also are limited to a difference at rank 10 for the obstruction 20 and 30 conditions. Due to the high variability the pneumo 40 does not reach significance either.



Table 91: estimates: aptt

|                       | Value  | Std.Error | DF  | t-value | p-value |
|-----------------------|--------|-----------|-----|---------|---------|
| (Intercept)           | 14.764 | 11.282    | 303 | 1.309   | 0.192   |
| r10                   | -0.006 | 0.282     | 303 | -0.021  | 0.983   |
| cndObstruction_20     | 32.823 | 14.607    | 42  | 2.247   | 0.030   |
| cndObstruction_30     | 38.975 | 26.248    | 42  | 1.485   | 0.145   |
| cndPneumo_20          | 11.932 | 13.833    | 42  | 0.863   | 0.393   |
| cndPneumo_30          | 22.433 | 13.942    | 42  | 1.609   | 0.115   |
| cndPneumo_40          | 71.026 | 14.272    | 42  | 4.977   | 0.000   |
| r10:cndObstruction_20 | -0.198 | 0.298     | 303 | -0.664  | 0.507   |
| r10:cndObstruction_30 | -9.468 | 2.802     | 303 | -3.380  | 0.001   |
| r10:cndPneumo_20      | 0.413  | 0.318     | 303 | 1.301   | 0.194   |
| r10:cndPneumo_30      | 0.572  | 0.414     | 303 | 1.383   | 0.168   |
| r10:cndPneumo_40      | 4.956  | 0.399     | 303 | 12.415  | 0.000   |

Table 92: contrasts: aptt

|               | Estimate | lwr     | upr     | sigma  | tstat   | pvalues |
|---------------|----------|---------|---------|--------|---------|---------|
| rank          | -0.006   | -0.776  | 0.764   | 0.277  | -0.022  | 1.000   |
| ctrl-obs 20   | -32.823  | -72.731 | 7.085   | 14.359 | -2.286  | 0.184   |
| ctrl-pnm 20   | -11.932  | -49.726 | 25.862  | 13.599 | -0.877  | 0.983   |
| obs 20-30     | -6.152   | -75.688 | 63.384  | 25.020 | -0.246  | 1.000   |
| pnm 20-30     | -10.501  | -41.794 | 20.791  | 11.259 | -0.933  | 0.974   |
| pnm 30-40     | -48.593  | -81.322 | -15.863 | 11.777 | -4.126  | 0.000   |
| x ctrl-obs 20 | 0.198    | -0.616  | 1.011   | 0.293  | 0.675   | 0.997   |
| x ctrl-pnm 20 | -0.413   | -1.282  | 0.455   | 0.312  | -1.324  | 0.824   |
| x obs 20-30   | 9.271    | 1.651   | 16.891  | 2.742  | 3.381   | 0.007   |
| x pnm 20-30   | -0.159   | -1.080  | 0.762   | 0.331  | -0.480  | 1.000   |
| x pnm 30-40   | -4.384   | -5.517  | -3.251  | 0.408  | -10.753 | 0.000   |

Table 93: variance - covariance: hema

|             | Variance  | StdDev    |
|-------------|-----------|-----------|
| (Intercept) | 6.3748312 | 2.5248428 |
| Residual    | 0.9452983 | 0.9722645 |

The predictions can be visualized as follows:

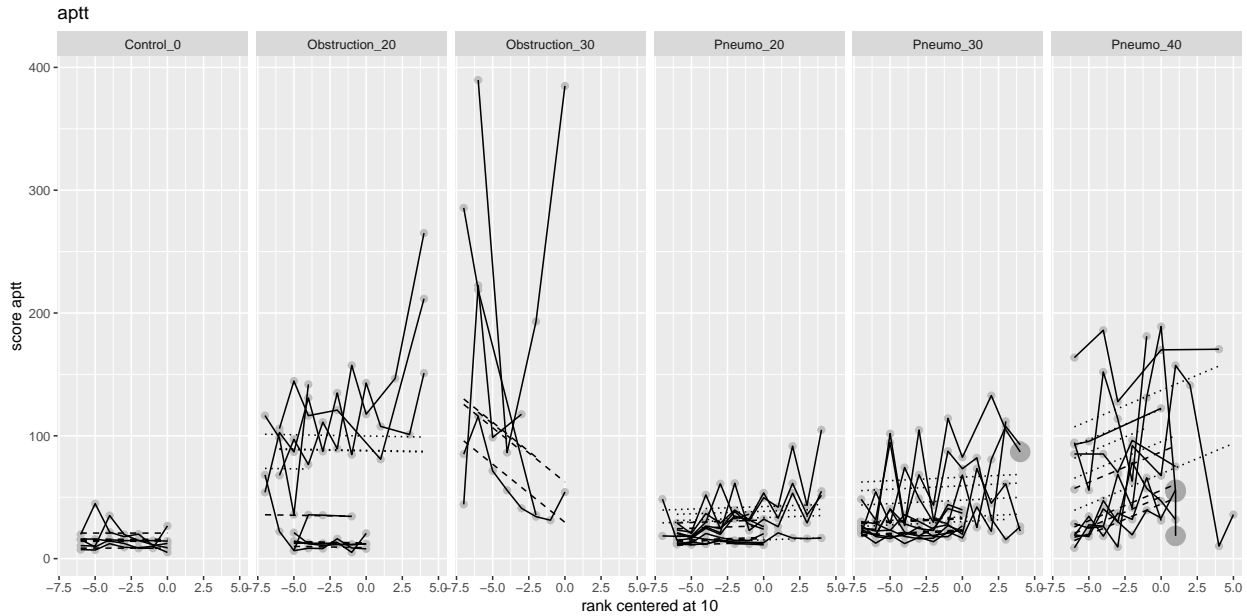

A few check are made to verify the quality of the model. Some issues are clear from the predictions and this also shows in the checks.

Note that for this variable it appears that the evolution runs somewhat different for the duration 3 and 5.

## hema

Different models are compared.

The final model allows for a pig specific intercept and variance, but does not include a pig specific evolution, following the AIC criterion.

The random intercept variance and residual variance are shown (the pig specific variances are not):

Looking at the random intercept variance and the residual variance, there seems to be a very strong intra-class correlation, illustrating that different pigs score different in average, conditional what else is in the model.

The typical output for the mean structure is included:

Simply focusing on a few main questions, contrasts are evaluated:

The evolution differs between the control and each of the two 20 conditions (pneumo and obstruction), also between the 20 and the 30 pneumo there seems to be a difference in evolution. At rank 10, there are only differences between the control and the 20 pneumo, and between the obstruction 20 and 30.

Table 94: estimates: hema

|                       | Value  | Std.Error | DF  | t-value | p-value |
|-----------------------|--------|-----------|-----|---------|---------|
| (Intercept)           | 24.693 | 1.137     | 366 | 21.722  | 0.000   |
| r10                   | -0.186 | 0.026     | 366 | -7.289  | 0.000   |
| cndObstruction_20     | 1.922  | 1.428     | 43  | 1.346   | 0.185   |
| cndObstruction_30     | 6.607  | 1.627     | 43  | 4.062   | 0.000   |
| cndPneumo_20          | 4.744  | 1.397     | 43  | 3.395   | 0.001   |
| cndPneumo_30          | 5.635  | 1.398     | 43  | 4.030   | 0.000   |
| cndPneumo_40          | 6.883  | 1.409     | 43  | 4.885   | 0.000   |
| r10:cndObstruction_20 | 0.112  | 0.042     | 366 | 2.678   | 0.008   |
| r10:cndObstruction_30 | 0.264  | 0.060     | 366 | 4.377   | 0.000   |
| r10:cndPneumo_20      | 0.260  | 0.033     | 366 | 7.754   | 0.000   |
| r10:cndPneumo_30      | 0.490  | 0.038     | 366 | 12.784  | 0.000   |
| r10:cndPneumo_40      | 0.416  | 0.054     | 366 | 7.653   | 0.000   |

Table 95: contrasts: hema

|               | Estimate | lwr    | upr    | sigma | tstat  | pvalues |
|---------------|----------|--------|--------|-------|--------|---------|
| rank          | -0.186   | -0.258 | -0.115 | 0.026 | -7.289 | 0.000   |
| ctrl-obs 20   | -1.922   | -5.927 | 2.082  | 1.428 | -1.346 | 0.834   |
| ctrl-pnm 20   | -4.744   | -8.662 | -0.825 | 1.397 | -3.395 | 0.007   |
| obs 20-30     | -4.685   | -8.748 | -0.621 | 1.449 | -3.233 | 0.013   |
| pnm 20-30     | -0.891   | -4.115 | 2.333  | 1.150 | -0.775 | 0.995   |
| pnm 30-40     | -1.249   | -4.514 | 2.017  | 1.164 | -1.073 | 0.952   |
| x ctrl-obs 20 | -0.112   | -0.228 | 0.005  | 0.042 | -2.678 | 0.072   |
| x ctrl-pnm 20 | -0.260   | -0.354 | -0.166 | 0.033 | -7.754 | 0.000   |
| x obs 20-30   | -0.152   | -0.331 | 0.026  | 0.064 | -2.391 | 0.154   |
| x pnm 20-30   | -0.231   | -0.331 | -0.130 | 0.036 | -6.430 | 0.000   |
| x pnm 30-40   | 0.074    | -0.082 | 0.231  | 0.056 | 1.332  | 0.843   |

Table 96: variance - covariance: inr

|             | Variance     | StdDev     | Corr   |
|-------------|--------------|------------|--------|
| (Intercept) | 0.0301925233 | 0.17375996 | (Intr) |
| rank        | 0.0003445704 | 0.01856261 | -0.472 |
| Residual    | 0.0059285873 | 0.07699732 |        |

The predictions can be visualized as follows:

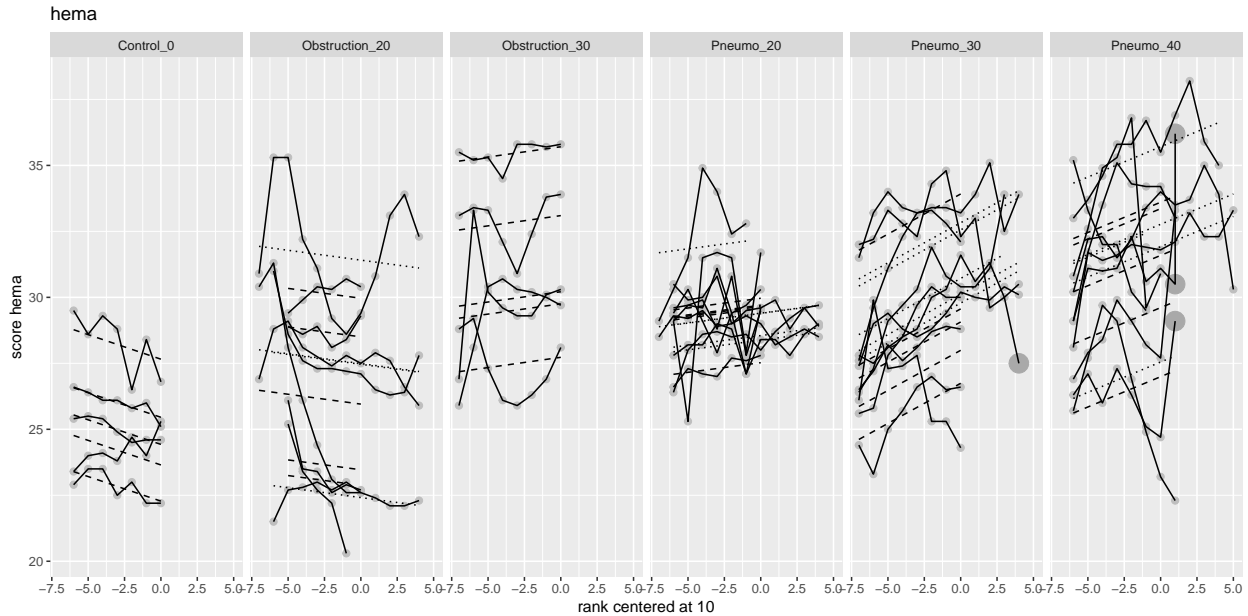

Most evolutions are quite well described by the average predicted evolution, except one very high value is noticed. Note that the dead (big dots) are not considered for estimating the model but are included in the visualization of the data.

A few check are made to verify the quality of the model. No severe distortions are observed, maybe suggesting one value that is a bit different.

Note that for this variable it appears that the evolution runs somewhat different for the duration 3 and 5.

## inr

Different models are compared.

The final model allows for a pig specific intercept and slope variance, following the AIC criterion. The pig specific variance model does not fit.

The random intercept and slope variance and residual variance are shown:

Looking at the random intercept variance and the residual variance, there seems to be a moderate intra-class correlation, illustrating that different pigs score different in average, conditional what else is in the model. The slope variance is minor.

The typical output for the mean structure is included:

Table 97: estimates: inr

|                       | Value  | Std.Error | DF  | t-value | p-value |
|-----------------------|--------|-----------|-----|---------|---------|
| (Intercept)           | 0.681  | 0.087     | 356 | 7.781   | 0.000   |
| r10                   | -0.055 | 0.011     | 356 | -4.878  | 0.000   |
| cndObstruction_20     | 0.364  | 0.108     | 43  | 3.368   | 0.002   |
| cndObstruction_30     | 0.666  | 0.123     | 43  | 5.421   | 0.000   |
| cndPneumo_20          | 0.531  | 0.106     | 43  | 5.004   | 0.000   |
| cndPneumo_30          | 0.350  | 0.106     | 43  | 3.303   | 0.002   |
| cndPneumo_40          | 0.346  | 0.106     | 43  | 3.262   | 0.002   |
| r10:cndObstruction_20 | 0.043  | 0.014     | 356 | 3.144   | 0.002   |
| r10:cndObstruction_30 | 0.065  | 0.015     | 356 | 4.336   | 0.000   |
| r10:cndPneumo_20      | 0.058  | 0.013     | 356 | 4.410   | 0.000   |
| r10:cndPneumo_30      | 0.037  | 0.013     | 356 | 2.881   | 0.004   |
| r10:cndPneumo_40      | 0.023  | 0.013     | 356 | 1.715   | 0.087   |

Table 98: contrasts: inr

|               | Estimate | lwr    | upr    | sigma | tstat  | pvalues |
|---------------|----------|--------|--------|-------|--------|---------|
| rank          | -0.055   | -0.086 | -0.024 | 0.011 | -4.878 | 0.000   |
| ctrl-obs 20   | -0.364   | -0.664 | -0.064 | 0.108 | -3.368 | 0.007   |
| ctrl-pnm 20   | -0.531   | -0.825 | -0.237 | 0.106 | -5.004 | 0.000   |
| obs 20-30     | -0.301   | -0.598 | -0.004 | 0.107 | -2.814 | 0.045   |
| pnm 20-30     | 0.181    | -0.054 | 0.416  | 0.085 | 2.138  | 0.244   |
| pnm 30-40     | 0.004    | -0.231 | 0.239  | 0.085 | 0.047  | 1.000   |
| x ctrl-obs 20 | -0.043   | -0.080 | -0.005 | 0.014 | -3.144 | 0.016   |
| x ctrl-pnm 20 | -0.058   | -0.094 | -0.022 | 0.013 | -4.410 | 0.000   |
| x obs 20-30   | -0.023   | -0.057 | 0.012  | 0.013 | -1.790 | 0.461   |
| x pnm 20-30   | 0.021    | -0.006 | 0.047  | 0.010 | 2.158  | 0.234   |
| x pnm 30-40   | 0.015    | -0.012 | 0.041  | 0.010 | 1.558  | 0.634   |

Simply focusing on a few main questions, contrasts are evaluated:

There is only a suggestion of the control differing from the pneumo 20 at rank 10, no indication of differential evolutions.

The predictions can be visualized as follows:

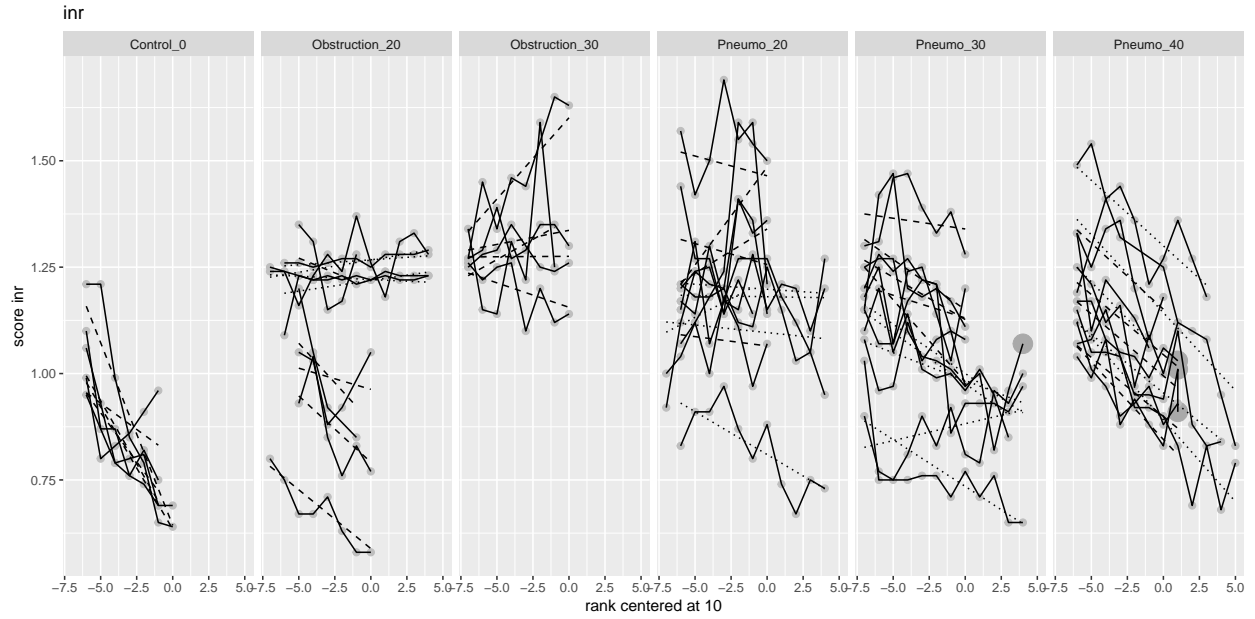

Most evolutions are quite well described by the average predicted evolution, but several observations clearly do not fit these evolutions. Note that the dead (big dots) are not considered for estimating the model but are included in the visualization of the data.

A few checks are made to verify the quality of the model. The model is not fully adequate, there is some skewness in the distribution of the residuals.
